# Supplementary material for: Gene discovery and pleiotropic architecture of Chronic Pain in a Genome-wide Association Study of >1.2 million Individuals
Source: medRxiv preprint, doi:10.1101/2025.02.28.25323112, version 1 (2025-03-05)
Supplement: Supplemental Table 1-23 [file 323112_file03.xlsx]

## Sheet: Index
Index of Supplementary Tables by order of appearance
Supplementary Table 1	Description of biobank datasets included in the meta-analysis
Supplementary Table 2	Genetic correlation of chronic pain across biobanks included in the meta-analysis
Supplementary Table 3	SNP heritability for chronic pain in primary and sex-stratified meta-analyses
Supplementary Table 4	Associated lead SNPs for chronic pain from the primary GWAS meta-analyses
Supplementary Table 5	Associated lead SNPs for chronic pain from the secondary GWAS meta-analyses
Supplementary Table 6	Region definition for fine-mapping analyses
Supplementary Table 7	Credible sets identified using fine-mapping analyses (FINEMAP)
Supplementary Table 8	Associated lead SNPs for chronic pain from the male GWAS meta-analyses
Supplementary Table 9	Associated lead SNPs for chronic pain from the female GWAS meta-analyses
Supplementary Table 10	Gene prioritization using eQTL (SMR)
Supplementary Table 11	Gene prioritization using sQTL (SMR)
Supplementary Table 12	Gene prioritization using mQTL (SMR)
Supplementary Table 13	Gene prioritization using blood pQTL (SMR)
Supplementary Table 14	Gene prioritization using brain pQTL (SMR)
Supplementary Table 15	Gene prioritization using chromatin-tissue association (H-MAGMA)
Supplementary Table 16	Summary information of prioritized genes across omics approaches
Supplementary Table 17	Summary information of prioritized genes with associated lead SNPs from meta-analyses
Supplementary Table 18	Genetic correlation of chronic pain with 80 complex traits
Supplementary Table 19	Genetic correlation of chronic pain with brain IDPs
Supplementary Table 20	Mendelian Randomization results for chronic pain and complex traits
Supplementary Table 21	Mendelian Randomization results for chronic pain and brain IDPs
Supplementary Table 22	Phenome-wide association meta-analysis for chronic pain PGS using PMBB and BioVU
Supplementary Table 23	Lab-wide associations for chronic pain PGS in BioVU

## Sheet: ST1
Supplementary Table 1. Description of biobank datasets included in the meta-analysis
Phenotypic endpoint	Pain assessment questionnaire or ICD used	Phenotyping details
Million Veteran Program
Pain intensity	Numerical Pain Rating Scale: ‘Are you in pain?’ They then rated their current pain on a scale of 0–10, where ‘0 is no pain and 10 is the worst pain imaginable’	Median pain score by year for each participant and the median of the annual median pain scores
UK Biobank
Multi-site chronic pain	Questionnaire: “Pain types experienced in the last month” (field ID 6159) at seven different body sites (head, face, neck/shoulder, back, stomach/abdomen, hip, knee)	Sum of body sites at which chronic pain (at least 3 months duration) was recorded: 0 to 7 sites
FinnGen
Pain (limb, back, neck, head abdominally)	ICD 9 and 10 included: G6_TRINEU|G6_ATYFAC|H7_OCUPAIN|M13_DORSALGIA|M13_RHEUMATISM|M13_MYALGIA|M13_NEURALGIA|M13_PANNICULITISNAS|M13_LIMBPAIN|M13_FIBROMYALGIA|PHANTOMLIMB|TEMPOROMANDIB|JOINTPAIN|R18_ABDOMI_PELVIC_PAIN|R18_HEADACHE1|R18_PAIN_NOT_ELSEW_CLASSIFIED	Individuals with one or more ICD-9 or -10 codes for 16 pain conditions were regarded as cases, and controls were those with no ICD pain codes

## Sheet: ST2
Supplementary Table 2. Genetic correlation of chronic pain across biobanks included in the meta-analysis
Biobank	rg	se	z	p	h2_obs	h2_obs_se	h2_int	h2_int_se	gcov_int	gcov_int_se
Primary meta-analyses
MVP vs UKB	0.7889	0.0189	41.75	0	0.0698	0.0031	1.0377	0.0122	0.0138	0.0088
MVP vs FinnGen	0.6593	0.0242	27.2589	1.3032e-163	0.0542	0.0029	1.1438	0.012	0.0115	0.0096
UKB vs FinnGen	0.6855	0.022	31.1671	2.974e-213	0.0558	0.0026	1.1427	0.0105	-0.0069	0.0063
Sex-stratified meta-analyses
MVP female vs UKB female	0.6996	0.0723	9.6814	3.6164e-22	0.0813	0.0041	1.0212	0.0088	2.0256e-05	0.0061
MVP male vs UKB male	0.7902	0.0289	27.299	4.3614e-164	0.0638	0.005	1.0188	0.01	0.0147	0.0076

## Sheet: ST3
Supplementary Table 3. SNP heritability for chronic pain in primary and sex-stratified meta-analyses
Dataset	h2	se	intercept	int_SE	lambda_GC	mean_Chi2	Ratio	Ratio_SE
Primary meta-analyses	0.054	0.0017	1.1524	0.0156	2.1155	2.6101	0.0947	0.0097
Secondary meta-analyses	0.0674	0.0022	1.1113	0.0138	1.959	2.3283	0.0838	0.0104
Male meta-analyses	0.0702	0.0026	1.092	0.0124	1.7452	1.9892	0.093	0.0125
Female meta-analyses	0.084	0.0035	1.011	0.0078	1.3101	1.3829	0.0287	0.0205

## Sheet: ST4
Supplementary Table 4. Associated lead SNPs for chronic pain from the primary GWAS meta-analyses (N = 1,235,695). GRCh37_bp: base position. P-values are considered GWS after correction for multiple testing at p<5x10-8.
GenomicLocus	Genomic_cord	rsID	CHR	GRCh37_bp	Effect allele	Other allele	BETA	SE	Freq1	P	Direction	mvp_Pval	ukb_Pval	fin_Pval	GWS_in_inputGWAS	HetPVal	start	end	nearestGene	dist	func	biotype	CADD	RDB	Indep_loci	Cond_Sig	Pain-related trait in GWAS catalog and MVP (within 1 Mb upstream and downstream of lead SNP)	Novel pain loci
1	p36.23	rs12140566	1	8677188	T	G	0.00953273	0.00166075	0.1786	9.467e-09	+++	1.80999e-07	0.00046	0.241261	N	0.01904	8375842	8980238	RERE	0	intronic	protein_coding	2.709	3a	L1	Y	Pain (pleiotropy) (GCST90104572)	N
2	p36.13	rs78695089	1	19402242	A	C	-0.0133305	0.00229441	0.0839	6.234e-09	---	8.90666e-06	0.06	0.000244641	N	0.2274	19240526	19769930	UBR4	0	intronic	protein_coding	5.171	4	L2	Y	Rheumatoid arthritis (GCST90302862)	N
3	p35.2	rs12739999	1	32207990	A	G	0.0121353	0.00162737	0.1882	8.88e-14	+++	1.77237e-06	7.5e-08	0.00544415	N	0.1435	32076061	32256590	BAI2	0	intronic	protein_coding	13.16	5	L3	Y	Pain intensity (PMID:38429522), Multisite chronic pain (GCST012332)	N
4	p34.3	rs4147222	1	37176422	A	G	-0.00945455	0.00136429	0.6806	4.21e-12	---	0.00538845	3.9e-07	2.46207e-05	N	0.1962	37082983	46865671	RP4-614N24.1	62318	intergenic	antisense	3.218		L4	Y	Pain intensity (PMID:38429522), Migraine (GCST90102553), Rheumatoid arthritis (GCST90013534)	N
4	p34.3	rs531785	1	38240931	A	G	-0.00724318	0.00127543	0.4644	1.351e-08	---	5.46084e-06	0.0043	0.0169551	N	0.3221	37082983	46865671	ACTN4P2	1410	intergenic	pseudogene	0.817	7	L5	Y	Pain intensity (PMID:38429522), Migraine (GCST90102553), Rheumatoid arthritis (GCST90013534)	N
4	p34.3	rs17264866	1	40022777	C	G	-0.0111465	0.00152088	0.774	2.326e-13	---	3.28609e-06	7.8e-07	0.00185281	N	0.3624	37082983	46865671	PPIEL	0	ncRNA_intronic	pseudogene	2.302	7	L6	Y	Pain (pleiotropy) (GCST90104572)	N
4	p34.3	rs11316275	1	42343350	A	AG	-0.00928396	0.00168401	0.8276	3.537e-08	---	2.53221e-07	0.043	0.0227217	N	0.06476	37082983	46865671	HIVEP3	0	intronic	protein_coding	0.443		L7	Y	Rheumatoid arthritis (GCST90132227)	N
4	p34.3	rs4660830	1	45473316	T	C	0.00806322	0.00135744	0.6744	2.843e-09	+++	4.98085e-06	0.0049	0.00422893	N	0.4372	37082983	46865671	HECTD3	0	intronic	protein_coding	2.683	5	L8	Y	Smoking initiation (GCST90243968)	Y
4	p34.3	rs3014237	1	46090252	A	G	-0.00896306	0.00143111	0.271	3.787e-10	---	6.56309e-07	0.013	0.000905357	N	0.2592	37082983	46865671	CCDC17	522	upstream	protein_coding	9.391		L9	Y	Smoking initiation (GCST90243968)	Y
5	p33	rs6676515	1	50861987	A	G	-0.00984533	0.00127646	0.5409	1.227e-14	---	1.03944e-05	3e-07	0.000116971	N	0.5963	50698760	51837195	HMGB1P45	2509	intergenic	pseudogene	3.103	6	L10	Y	Multisite chronic pain (GCST012332), Pain (pleiotropy) (GCST90104572)	N
6	p31.3	rs577841	1	65731694	T	G	0.00893272	0.00151711	0.7724	3.906e-09	+++	0.00404284	5.9e-06	0.00442996	N	0.3307	65698179	65869163	DNAJC6	0	intronic	protein_coding	9.557	3a	L11	Y	Pain (pleiotropy) (GCST90104572)	N
7	p31.1	rs34361149	1	72750470	A	G	-0.0103742	0.00171163	0.1655	1.355e-09	---	1.36863e-05	0.002	0.00249557	N	0.6464	72519040	73298749	NEGR1	2052	intergenic		8.685	4	L12	Y	Migraine (GCST003720), Osteoarthritis (GCST90271767)	N
8	p31.1	rs71658797	1	77967507	A	T	0.0135411	0.00194836	0.1213	3.663e-12	+++	1.24735e-09	1.6e-05	0.10994	Y	0.007572	77557339	78623626	AK5	0	intronic	protein_coding	10.96	5	L13	Y	Pain intensity (PMID:38429522)	N
9	p22.2	rs17130426	1	88790511	A	T	0.0128433	0.00218386	0.9064	4.087e-09	+++	1.45847e-06	0.02	0.00296845	N	0.2394	88629880	88881800	CTA-21C21.1	11525	intergenic	pseudogene	2.597	7	L14	Y	Smoking initiation (GCST90243968)	Y
10	p21.3	rs6658412	1	98309251	A	C	0.00956056	0.00144747	0.2615	3.982e-11	+++	0.000113328	6.4e-06	0.00200623	N	0.5525	98012711	98562260	DPYD	0	intronic	protein_coding	2.002	6	L15	Y	Pain (pleiotropy) (GCST90104572), Musculoskeletal pain factor (GCST90129462)	N
11	p21.1	rs12722976	1	103345744	C	G	-0.00719383	0.00127257	0.4879	1.575e-08	---	7.72118e-05	0.0007	0.0149012	N	0.5814	102902818	103757081	COL11A1	0	intronic	protein_coding	0.19	6	L16	Y	Back pain (GCST90103483, GCST90103484)	N
12	p13.3	rs569670	1	110022896	A	C	0.00810067	0.00148228	0.7566	4.632e-08	+++	0.0101998	2.1e-06	0.0264198	N	0.1247	109825591	112347256	SYPL2	0	UTR3	protein_coding	0.801	7	L17	Y	Pain (pleiotropy) (GCST90104572)	N
12	p13.3	rs12033257	1	112318484	A	G	0.0100266	0.001604	0.6194	4.067e-10	++?	0.000617464	4.2e-08		Y	0.1005	109825591	112347256	KCND3	0	UTR3	protein_coding	1.056	5	L18	Y	Multisite chronic pain (GCST012332)	N
13	p12	rs1289882	1	117903516	T	C	0.013916	0.00241054	0.1184	7.771e-09	++?	2.19156e-06	0.00069		N	0.4371	117812481	118098984	RP11-188D8.1	4004	intergenic	lincRNA	1.673	6	L19	N	Pain intensity (PMID:38429522), Osteoarthritis (hip) (GCST90034522)	N
13	p12	rs1289948	1	117957288	A	G	-0.00863575	0.00147117	0.2489	4.356e-09	---	8.9046e-07	0.00016	0.14821	N	0.04892	117812481	118098984	MAN1A2	0	intronic	protein_coding	1.338	7	L19	Y	Pain intensity (PMID:38429522), Osteoarthritis (hip) (GCST90034522)	N
14	q21.2	rs115815732	1	150382759	T	C	0.0145094	0.0026477	0.9385	4.243e-08	+++	2.3803e-05	0.00053	0.0749428	N	0.223	149673166	156598920	RPRD2	0	intronic	protein_coding	4.799	3a	L20	N	Multisite chronic pain (GCST012332), Chronic musculoskeletal pain (GCST90245879)	N
14	q21.2	rs60709164	1	150494720	CAAAA	C	0.0118318	0.00159029	0.6009	1.005e-13	++?	0.000125981	1.2e-11		Y	0.02114	149673166	156598920	LINC00568	4211	intergenic	lincRNA	0.882		L20	Y	Multisite chronic pain (GCST012332), Chronic musculoskeletal pain (GCST90245879)	N
14	q21.2	rs9660679	1	153582258	T	C	-0.00702931	0.00127319	0.4802	3.375e-08	---	0.000109955	0.00034	0.0352201	N	0.4171	149673166	156598920	S100A16	0	intronic	protein_coding	9.446	4	L21	Y	Pain (pleiotropy) (GCST90104572)	N
14	q21.2	rs12136718	1	156409585	A	G	0.0135288	0.00246877	0.0715	4.261e-08	+++	0.00111874	0.0098	0.000280808	N	0.7953	149673166	156598920	RP11-98G7.1	6618	intergenic	lincRNA	13.43	4	L22	Y	Pain (pleiotropy) (GCST90104572)	N
15	q24.1	rs11576904	1	166878464	C	G	-0.00828644	0.00132923	0.3551	4.546e-10	---	3.79372e-12	0.23	0.012984	Y	0.0002058	166515192	169086221	RP4-782G3.1	1146	intergenic	lincRNA	4.131	1f	L23	Y	Pain intensity (PMID:38429522)	N
15	q24.1	rs686610	1	168709029	A	G	-0.00831735	0.00127293	0.4829	6.384e-11	---	0.000121048	0.00011	0.000305548	N	0.9655	166515192	169086221	AL049798.1	8004	intergenic	miRNA	0.406		L24	Y	Smoking cessation (GCST90243968)	Y
15	q24.1	rs1200136	1	169079664	T	C	-0.00719509	0.00131899	0.368	4.906e-08	---	0.00146854	0.003	0.000981635	N	0.9834	166515192	169086221	ATP1B1	0	intronic	protein_coding	10.6	2b	L25	Y	Smoking cessation (GCST90243968)	Y
16	q25.1	rs7536102	1	174465939	T	C	0.0108211	0.00142233	0.7236	2.782e-14	+++	4.36542e-05	7.6e-07	2.98903e-05	N	0.7033	173471890	176895381	RABGAP1L	0	intronic	protein_coding	4.843	5	L26	Y	Pain intensity (PMID:38429522), Pain (pleiotropy) (GCST90104572)	N
16	q25.1	rs12138378	1	176589008	T	C	0.0212481	0.00348558	0.0527	1.087e-09	++?	2.9678e-06	8.5e-05		N	0.7306	173471890	176895381	PAPPA2	0	intronic	protein_coding	4.217	6	L27	Y	Smoking initiation (GCST90243968)	Y
17	q31.1	rs12121218	1	191031130	T	G	-0.0100044	0.00161466	0.8079	5.808e-10	---	0.00213639	0.0053	1.12912e-06	N	0.2848	190494599	191808947	HNRNPA1P46	84024	intergenic	pseudogene	4.513	7	L28	N	Pain intensity (PMID:38429522)	N
17	q31.1	rs11332270	1	191388815	G	GA	0.00908036	0.00132463	0.3607	7.149e-12	+++	3.89141e-08	0.0027	0.000947175	Y	0.2076	190494599	191808947	RP11-309H21.2	191217	intergenic	lincRNA	0.91		L28	Y	Pain intensity (PMID:38429522)	N
18	q31.3	rs12561959	1	198293574	A	G	0.0102096	0.00143939	0.2661	1.315e-12	+++	3.20661e-07	0.022	1.5569e-06	N	0.1264	198030154	199119573	NEK7	2023	intergenic		0.283	7	L29	Y	Back pain (GCST90103483)	N
18	q31.3	rs12137224	1	198776932	A	G	-0.0100762	0.00182938	0.1407	3.627e-08	---	5.87901e-05	0.00083	0.0305914	N	0.4382	198030154	199119573	MIR181A1HG	0	ncRNA_exonic	lincRNA	0.532	7	L29	N	Back pain (GCST90103483)	N
19	q32.2	rs7540932	1	208694658	T	G	0.00871814	0.00158512	0.4691	3.797e-08	?++		0.00062	1.40712e-05	N	0.5694	208638645	210958191	RP11-565N2.1	85786	intergenic	lincRNA	2.055	6	L30	Y	Smoking initiation (GCST90243968), Smoking status (GCST010018)	Y
19	q32.2	rs4328122	1	210834507	A	G	-0.00833305	0.00136028	0.677	8.993e-10	---	0.000651448	0.025	8.24005e-07	N	0.1813	208638645	210958191	HHAT	0	intronic	protein_coding	7.695	7	L31	Y	Smoking initiation (GCST90243968), Smoking status (GCST010018)	Y
20	q32.3	rs12124666	1	214491961	T	C	0.0116551	0.00209361	0.8971	2.599e-08	+++	0.00319689	0.055	2.05973e-06	N	0.1404	214424307	214662788	SMYD2	0	intronic	protein_coding	0.259	4	L31	N	Smoking initiation (GCST90243968)	Y
21	q42.13	rs6666360	1	229830140	A	C	-0.0103497	0.00185912	0.1354	2.598e-08	---	0.000213264	0.00011	0.0376565	N	0.3677	229554924	230150116	RP11-108F13.2	4488	intergenic	pseudogene	4.726	4	L32	Y	Smoking initiation (GCST90243968)	Y
22	q43	rs12032174	1	237856168	T	C	0.00838334	0.0013345	0.651	3.343e-10	+++	2.42711e-10	0.0077	0.0755231	Y	0.004326	237834701	237912733	RYR2	0	intronic	protein_coding	0.38	5	L33	Y	Pain intensity (PMID:38429522)	N
23	q43	rs3897821	1	243420388	A	G	-0.00926561	0.0013582	0.6751	8.991e-12	---	8.83788e-06	2.2e-08	0.0698265	Y	0.02017	243098453	245479650	SDCCAG8	0	intronic	protein_coding	2.802		L34	Y	Pain intensity (PMID:38429522), Multisite chronic pain (GCST008512)	N
23	q43	rs35570502	1	243728212	T	C	-0.0112839	0.00179081	0.8519	2.967e-10	---	2.63564e-08	0.0038	0.0174297	Y	0.07094	243098453	245479650	AKT3	0	intronic	protein_coding	4.736	7	L34	N	Pain intensity (PMID:38429522), Multisite chronic pain (GCST008512)	N
23	q43	rs6428906	1	245422577	T	C	-0.00728905	0.00127297	0.4825	1.03e-08	---	0.0245202	0.0001	0.000128209	N	0.3538	243098453	245479650	KIF26B	0	intronic	protein_coding	1.39	5	L35	Y	Pain intensity (PMID:38429522), Multisite chronic pain (GCST008512)	N
24	p24.3	rs13012094	2	16631289	T	C	0.00773519	0.00136351	0.6799	1.403e-08	+++	3.32109e-05	0.00031	0.0398804	N	0.3209	16575908	16782979	AC010880.1	17318	intergenic	lincRNA	16.22	7	L36	Y	Rheumatoid arthritis (GCST002318)	N
25	p24.1	rs4416248	2	22455521	A	G	0.00911884	0.00127322	0.4798	7.955e-13	+++	5.88452e-07	0.00017	0.00029849	N	0.6463	22414978	22722766	AC068490.2	0	ncRNA_intronic	lincRNA	0.325	6	L37	Y	Pain (pleiotropy) (GCST90104572)	N
26	p23.3	rs6705514	2	27213937	T	C	-0.0114348	0.00130609	0.3868	2.038e-18	---	3.85419e-13	0.0012	5.37886e-06	Y	0.02664	26937669	28293299	MAPRE3	0	ncRNA_intronic	protein_coding	0.008	7	L38	Y	Pain intensity (PMID:38429522)	N
26	p23.3	rs72810784	2	27379262	T	C	-0.00707186	0.00127352	0.4772	2.811e-08	---	0.003288	0.0024	0.000263682	N	0.8462	26937669	28293299	AC013403.13	2168	intergenic	pseudogene	0.316	6	L38	N	Pain intensity (PMID:38429522)	N
27	p23.1	rs56229323	2	32325025	T	TAGTGCTGC	-0.010015	0.00130335	0.6087	1.541e-14	---	1.36908e-08	0.018	2.31505e-07	Y	0.06289	31588577	32861555	SPAST	0	intronic	protein_coding	3.233		L39	Y	Pain intensity (PMID:38429522), Osteoarthritis of the hip or knee (GCST007092, GCST90034521), osteoarthritis (GCST007093), Knee osteoarthritis (GCST006925, GCST007090)	N
28	p16.3	rs76376207	2	51093698	T	C	0.0174774	0.00252673	0.068	4.609e-12	+++	1.10315e-08	0.0022	0.00175376	Y	0.1374	50884338	53391441	NRXN1	0	intronic	protein_coding	1.589	6	L40	Y	Pain intensity (PMID:38429522)	N
28	p16.3	rs72807818	2	51819019	A	G	-0.0113318	0.00197246	0.1179	9.175e-09	---	1.07593e-10	0.093	0.0938556	Y	0.0007855	50884338	53391441	AC007682.1	0	ncRNA_intronic	lincRNA	0.333	7	L41	Y	Pain intensity (PMID:38429522)	N
28	p16.3	rs1376569	2	53087260	T	C	-0.00856496	0.00130524	0.3882	5.299e-11	---	5.9105e-10	7.4e-05	0.251812	Y	0.002127	50884338	53391441	AC010967.2	0	ncRNA_intronic	lincRNA	6.846		L42	Y	Pain intensity (PMID:38429522)	N
29	p16.1	rs13018470	2	59694749	T	C	-0.00747472	0.00131274	0.3767	1.24e-08	---	0.00310451	1.2e-05	0.0100967	N	0.3494	59312947	61994601	RP11-444A22.1	0	ncRNA_intronic	lincRNA	0.453	6	L43	Y	Pain intensity (PMID:38429522), Methadone dose in opioid dependence (GCST004136)	N
29	p16.1	rs2540094	2	59761338	T	C	-0.0104594	0.00177128	0.8479	3.517e-09	---	1.82813e-06	1.8e-06	0.494006	N	0.003775	59312947	61994601	RP11-444A22.1	0	ncRNA_intronic	lincRNA	0.975		L44	Y	Pain intensity (PMID:38429522), Methadone dose in opioid dependence (GCST004136)	N
29	p16.1	rs359258	2	60486157	T	C	-0.010578	0.00132657	0.3583	1.535e-15	---	6.36154e-07	0.00022	3.34495e-07	N	0.6362	59312947	61994601	AC007381.3	91572	intergenic	lincRNA	3.203	5	L45	Y	Pain intensity (PMID:38429522), Methadone dose in opioid dependence (GCST004136)	N
29	p16.1	rs3087898	2	61765074	A	G	-0.00720962	0.0012939	0.4088	2.514e-08	---	1.88895e-06	0.0071	0.032765	N	0.1773	59312947	61994601	XPO1	0	UTR5	protein_coding	18.28		L46	Y	Pain intensity (PMID:38429522), Methadone dose in opioid dependence (GCST004136)	N
30	p12	rs4528777	2	80702160	A	G	-0.010711	0.00174276	0.2903	7.929e-10	?--		1.1e-07	0.000644941	N	0.1518	80503573	84014885	CTNNA2	0	intronic	protein_coding	1.808	6	L47	Y	Multisite chronic pain (GCST012332)	N
30	p12	rs114089087	2	83078007	A	G	0.0197237	0.0031568	0.0424	4.153e-10	+++	1.76752e-07	0.027	0.000960771	N	0.1337	80503573	84014885	AC098817.5	5919	intergenic	pseudogene	1.335	5	L48	Y	Smoking initiation (GCST90243968)	Y
30	p12	rs13412678	2	83231361	T	C	-0.01157	0.00188529	0.869	8.435e-10	---	0.00463286	0.0045	7.02716e-07	N	0.2189	80503573	84014885	AC098817.5	146475	intergenic	pseudogene	4.586	6	L48	N	Smoking initiation (GCST90243968)	Y
31	q11.2	rs4850917	2	100493439	A	G	0.0093276	0.00131764	0.6302	1.457e-12	+++	0.000880207	1.1e-07	0.000226694	N	0.2537	100202482	100543061	AFF3	0	intronic	protein_coding	1.137	7	L49	Y	Multisite chronic pain (GCST012332), Pain (pleiotropy) (GCST90104572)	N
32	q12.1	rs10204051	2	103775435	T	G	0.00738101	0.0012956	0.4054	1.222e-08	+++	1.27898e-06	0.11	0.000862363	N	0.09732	103703338	107701621	AC073987.1	0	ncRNA_intronic	lincRNA	2.299	7	L50	N	Pain (pleiotropy) (GCST90104572)	N
32	q12.1	rs264957	2	104305595	T	C	-0.00933984	0.0015642	0.4541	2.356e-09	--?	2.29205e-07	0.0013		N	0.2273	103703338	107701621	AC018880.2	65306	intergenic	pseudogene	1.526	7	L50	Y	Pain intensity (PMID:38429522), smoking initiation (GCST008810)	N
32	q12.1	rs10170477	2	104993719	A	C	0.00843358	0.00151384	0.229	2.535e-08	+++	0.00610607	0.014	8.79954e-06	N	0.3201	103703338	107701621	AHCYP3	17740	intergenic	pseudogene	1.058	6	L51	Y	Pain intensity (PMID:38429522), smoking status (GCST007468)	N
32	q12.1	rs2906605	2	107624367	T	C	0.00724164	0.00127314	0.4807	1.284e-08	+++	0.00870152	0.005	9.39832e-06	N	0.3611	103703338	107701621	AC005040.3	44236	intergenic	pseudogene	0.057	6	L52	Y	Alcohol consumption (GCST90032654)	Y
33	q22.1	rs1187143	2	138802939	A	T	-0.00742295	0.00127258	0.4877	5.453e-09	---	4.89137e-06	0.0083	0.00452783	N	0.3896	138698117	144519082	HNMT	29008	intergenic		0.62	7	L53	N	Smoking initiation (GCST90243968), Insomnia (GCST90131901)	Y
33	q22.1	rs17651262	2	139437714	A	G	0.00727185	0.00132941	0.3549	4.495e-08	+++	2.53367e-07	0.087	0.0121428	N	0.05308	138698117	144519082	NXPH2	0	intronic	protein_coding	2.662	7	L53	N	Smoking initiation (GCST90243968), Insomnia (GCST90131901)	Y
33	q22.1	rs201316997	2	139634194	A	AAAATAGC	0.0155127	0.00261421	0.0632	2.951e-09	+++	6.07203e-05	0.093	6.09593e-06	N	0.126	138698117	144519082	RN7SKP286	12728	intergenic	misc_RNA	3.085		L53	Y	Smoking initiation (GCST90243968), Insomnia (GCST90131901)	Y
33	q22.1	rs10187901	2	140586648	A	C	0.0123483	0.00223054	0.0893	3.094e-08	+++	0.00363033	0.02	1.42603e-05	N	0.3573	138698117	144519082	AC078851.2	2297	intergenic	miRNA	1.408	6	L53	N	Smoking initiation (GCST90243968), Insomnia (GCST90131901)	Y
33	q22.1	rs13001716	2	142229102	T	C	-0.00952416	0.00174085	0.1587	4.482e-08	---	3.00536e-05	0.002	0.0290851	N	0.407	138698117	144519082	LRP1B	0	intronic	protein_coding	1.541	6	L54	Y	Smoking initiation (GCST90243968)	Y
33	q22.1	rs16822399	2	144126493	T	C	0.00961675	0.00157652	0.7953	1.061e-09	+++	2.18361e-05	0.076	7.61062e-06	N	0.1357	138698117	144519082	ARHGAP15	0	ncRNA_intronic	protein_coding	0.365	7	L55	Y	Pain intensity (PMID:38429522), Migraine (GCST90102553)	N
33	q22.1	rs13428598	2	144250487	T	C	-0.00881222	0.00132157	0.3646	2.588e-11	---	1.82248e-06	0.0082	4.61892e-05	N	0.3877	138698117	144519082	ARHGAP15	0	ncRNA_intronic	protein_coding	0.207	7	L56	Y	Pain intensity (PMID:38429522), Migraine (GCST90102553)	N
33	q22.1	rs28396876	2	144487090	A	G	0.00888126	0.00131321	0.624	1.356e-11	+++	2.96543e-07	0.0035	0.000312004	N	0.3565	138698117	144519082	ARHGAP15	0	ncRNA_intronic	protein_coding	1.704	5	L57	Y	Pain intensity (PMID:38429522), Migraine (GCST90102553)	N
34	q24.2	rs35698743	2	160422212	T	C	-0.0135731	0.00217658	0.0943	4.482e-10	---	1.37679e-07	0.00074	0.0353029	N	0.09628	160257558	164449314	BAZ2B	0	intronic	protein_coding	0.002	7	L58	Y	Opioid use disorder (GCST90296425)	Y
34	q24.2	rs6710938	2	161333872	A	C	0.00860066	0.00152089	0.774	1.559e-08	+++	5.30988e-06	0.0034	0.0233572	N	0.2916	160257558	164449314	RBMS1	0	intronic	protein_coding	0.03	6	L58	N	Opioid use disorder (GCST90296425)	Y
34	q24.2	rs7421396	2	164403334	A	G	0.0105993	0.00175835	0.2818	1.659e-09	?++		2.7e-05	1.51381e-05	N	0.9984	160257558	164449314	FIGN	46571	intergenic		0.55	7	L59	Y	Smoking cessation (GCST90243968)	Y
35	q31.1	rs10182067	2	171596129	A	G	-0.0118076	0.00162639	0.6439	3.858e-13	--?	3.8672e-08	2e-06		Y	0.7567	171570488	172052632	AC007405.4	0	ncRNA_intronic	lincRNA	0.946	3a	L60	Y	Pain intensity (PMID:38429522), smoking status (GCST007468)	N
36	q33.3	rs114354942	2	206891138	T	C	-0.0145333	0.00215724	0.0962	1.618e-11	---	2.78463e-05	0.046	5.89916e-08	N	0.06232	206430393	212344135	INO80D	0	intronic	protein_coding	1.987	6	L61	Y	Pain (pleiotropy) (GCST90104572)	N
36	q33.3	rs142895582	2	207404213	T	C	0.030657	0.00494707	0.9753	5.755e-10	+?+	0.00163386		1.58209e-08	Y	0.06255	206430393	212344135	ADAM23	0	intronic	protein_coding	6.947	7	L62	Y	Pain intensity (PMID:38429522)	N
36	q33.3	rs55772859	2	208042581	A	C	0.010915	0.00135775	0.3253	9.027e-16	+++	9.24688e-07	1.1e-07	0.000196182	N	0.4716	206430393	212344135	AC007879.1	0	ncRNA_intronic	lincRNA	0.619	6	L63	Y	Pain intensity (PMID:38429522)	N
36	q33.3	rs57402142	2	208509471	G	GGAAAAAAAA	-0.0100485	0.0015647	0.5476	1.343e-10	--?	1.34206e-08	0.00085		Y	0.1422	206430393	212344135	AC079767.3	10033	intergenic	pseudogene	0.828		L63	N	Pain intensity (PMID:38429522)	N
36	q33.3	rs112314380	2	211356071	A	G	-0.0128	0.00179902	0.2498	1.12e-12	--?	5.14696e-07	4.5e-07		N	0.8181	206430393	212344135	CPS1	0	intronic	protein_coding	0.68	5	L64	Y	Pain (pleiotropy) (GCST90104572), General pain factor (GCST90129461)	N
36	q33.3	rs6435622	2	212296094	C	G	0.00847809	0.00137945	0.3067	7.969e-10	+++	0.000293297	7.5e-06	0.0100988	N	0.3636	206430393	212344135	ERBB4	0	intronic	protein_coding	0.302	6	L65	Y	Pain (pleiotropy) (GCST90104572), General pain factor (GCST90129461)	N
37	q35	rs2280039	2	220363488	A	G	0.00877366	0.00134318	0.6604	6.476e-11	+++	3.19238e-08	0.0062	0.00301203	Y	0.122	220339100	222981144	AC053503.11	0	ncRNA_intronic	antisense	9.373		L66	Y	Pain intensity (PMID:38429522)	N
37	q35	rs17315907	2	222879533	A	G	0.00767309	0.00127228	0.4943	1.626e-09	+++	2.21708e-06	0.0031	0.00680409	N	0.3515	220339100	222981144	AC009302.4	29710	intergenic	pseudogene	4.984	7	L67	Y	Pain intensity (PMID:38429522), Insomnia (GCST90131901), Depression (GCST90018833)	N
38	p26.3	rs75120399	3	2306480	T	C	-0.0103396	0.00185165	0.8633	2.353e-08	---	0.0110868	0.00049	0.000236314	N	0.624	2231987	2422321	CNTN4	0	intronic	protein_coding	5.685	6	L68	Y	Smoking initiation (GCST90243968)	Y
39	p24.3	rs4635727	3	18705035	A	G	0.0077582	0.00139913	0.7081	2.933e-08	+++	0.00306381	0.0023	0.00031722	N	0.8708	18609478	20754619	AC144521.1	0	ncRNA_intronic	processed_transcript	11		L69	Y	Migraine (GCST90000016)	N
39	p24.3	rs62237509	3	20724955	A	T	-0.00856741	0.00144305	0.264	2.912e-09	---	0.00020807	3.4e-05	0.0145285	N	0.4344	18609478	20754619	RNU6-815P	175706	intergenic	snRNA	5.947	7	L70	Y	Osteoarthritis (GCST90034520)	N
40	p24.1	rs6551129	3	26699296	A	G	-0.0100778	0.00164858	0.818	9.808e-10	---	9.6513e-06	0.01	0.000408404	N	0.5105	26560818	29807487	LRRC3B	0	intronic	protein_coding	6.031	5	L71	Y	Smoking initiation (GCST90243968)	Y
40	p22.1	rs7638850	3	29766450	C	G	0.00727827	0.00133034	0.3538	4.463e-08	+++	0.000565685	0.00031	0.0151116	N	0.6502	43202378	51287152	RBMS3	0	intronic	protein_coding	0.799	6	L72	Y	Pain (pleiotropy) (GCST90104572)	N
41	p22.1	rs3733156	3	43761441	A	G	0.00836801	0.00144376	0.2636	6.811e-09	+++	0.00222645	1e-05	0.00916769	N	0.3559	43202378	51287152	ABHD5	0	downstream	protein_coding	9.762		L73	Y	Osteoarthritis and BMI (GCST90271772)	N
41	p22.1	rs3804580	3	44892033	A	G	-0.00802563	0.0012727	0.4859	2.856e-10	---	0.00110539	0.0012	9.65006e-06	N	0.6247	43202378	51287152	KIF15	0	intronic	protein_coding	9.057		L74	Y	Osteoarthritis and BMI (GCST90271772)	N
41	p22.1	rs143861937	3	48451307	A	G	0.0135794	0.00216025	0.9041	3.249e-10	+++	1.49352e-05	0.015	4.63458e-05	N	0.4199	43202378	51287152	PLXNB1	0	intronic	protein_coding	7.825	5	L75	N	Pain intensity (PMID:38429522), Migraine (GCST90102553)	N
41	p22.1	rs9586	3	49213637	T	C	-0.0122408	0.00157196	0.7937	6.85e-15	---	4.83989e-05	9.1e-07	5.52752e-06	N	0.732	43202378	51287152	KLHDC8B	0	UTR3	protein_coding	11.63		L75	N	Pain intensity (PMID:38429522), Multisite chronic pain (GCST008512)	N
41	p22.1	rs115435316	3	49568181	A	G	0.026172	0.00381627	0.0286	6.981e-12	+++	0.000193185	1.1e-07	0.00383575	N	0.1815	43202378	51287152	DAG1	0	intronic	protein_coding	2.802	5	L75	N	Pain intensity (PMID:38429522), Multisite chronic pain (GCST008512)	N
41	p22.1	rs73077107	3	49671037	A	G	-0.0144841	0.00176227	0.154	2.051e-16	---	4.36103e-10	0.00023	2.23955e-05	Y	0.2306	43202378	51287152	BSN	0	intronic	protein_coding	14.55	7	L75	N	Pain intensity (PMID:38429522), Multisite chronic pain (GCST008512)	N
41	p22.1	rs2271961	3	49878113	T	C	-0.0143124	0.00127778	0.5469	4.036e-29	---	1.13043e-19	2.6e-06	3.80329e-08	Y	0.009828	43202378	51287152	TRAIP	0	intronic	protein_coding	1.395	1f	L75	Y	Pain intensity (PMID:38429522), Multisite chronic pain (GCST008512; GCST012332)	N
41	p22.1	rs150628303	3	49955296	A	G	-0.0202688	0.00296978	0.9518	8.778e-12	---	1.82741e-10	0.045	0.000916811	Y	0.01075	43202378	51287152	MON1A	0	intronic	protein_coding	7.006	7	L76	N	Pain intensity (PMID:38429522), Multisite chronic pain (GCST008512; GCST012332)	N
41	p22.1	rs142344547	3	49956036	A	G	-0.0198776	0.00249468	0.0699	1.612e-15	---	5.42234e-10	3.7e-06	0.00346354	Y	0.08252	43202378	51287152	MON1A	0	intronic	protein_coding	2.617	7	L76	Y	Pain intensity (PMID:38429522), Multisite chronic pain (GCST008512; GCST012332)	N
41	p22.1	rs34118560	3	50212381	A	AT	0.0164587	0.00275275	0.9434	2.249e-09	+++	9.18353e-05	0.00011	0.00993276	N	0.561	43202378	51287152	SEMA3F	0	intronic	protein_coding	2.096		L76	N	Pain intensity (PMID:38429522), Multisite chronic pain (GCST008512; GCST012332)	N
41	p22.1	rs4547694	3	50297330	A	G	-0.00779455	0.00131023	0.3804	2.699e-09	---	0.000336283	0.00044	0.00135416	N	0.957	43202378	51287152	U73166.2	404	upstream	lincRNA	4.447		L76	N	Pain intensity (PMID:38429522), Multisite chronic pain (GCST008512; GCST012332)	N
42	p14.3	rs13071861	3	58371332	C	G	-0.00974971	0.00174757	0.8428	2.418e-08	---	0.00165411	0.003	0.000389601	N	0.9225	57676428	58556841	PXK	0	intronic	protein_coding	2.372	7	L77	Y	Rheumatoid arthritis (GCST000679)	N
43	p14.1	rs6780736	3	67987662	T	G	-0.012583	0.00220406	0.0917	1.138e-08	---	3.3817e-07	0.01	0.0324923	N	0.09847	67587445	78633484	RP11-81N13.1	0	ncRNA_intronic	lincRNA	9.366	7	L78	Y	Pain intensity (PMID:38429522)	N
43	p14.1	rs1032376	3	68317975	T	C	0.0110185	0.00200957	0.8083	4.187e-08	?++		1.6e-05	0.000554383	N	0.4898	67587445	78633484	FAM19A1	0	intronic	protein_coding	16.13	6	L78	N	Pain intensity (PMID:38429522)	N
43	p14.1	rs5849952	3	70514634	T	TG	0.0119337	0.00167373	0.6632	1.004e-12	?++		1.1e-06	1.92331e-07	N	0.8964	67587445	78633484	RP11-231I13.2	152756	intergenic	antisense	9.024		L79	Y	Juvenile idiopathic osteoarthritis (GCST90010715)	N
43	p14.1	rs12487457	3	71327991	C	G	-0.0138937	0.00254417	0.933	4.727e-08	---	2.88755e-06	0.038	0.00852001	N	0.193	67587445	78633484	FOXP1	0	intronic	protein_coding	0.417	6	L79	N	Juvenile idiopathic osteoarthritis (GCST90010715)	N
43	p14.1	rs1696286	3	71660449	T	C	0.00708028	0.00127229	0.494	2.615e-08	+++	0.000366142	0.00013	0.0238232	N	0.4789	67587445	78633484	RP11-154H23.3	23888	intergenic	lincRNA	7.197		L79	N	Juvenile idiopathic osteoarthritis (GCST90010715)	N
43	p14.1	rs11710505	3	73424991	A	G	-0.0110342	0.0020044	0.193	3.693e-08	?--		0.41	6.31539e-12	Y	2.721e-05	67587445	78633484	PDZRN3	6592	intergenic		0.939	7	L80	Y	Pain (FinnGen)	N
43	p14.1	rs6549671	3	74952237	A	G	-0.0085436	0.00151268	0.7705	1.626e-08	---	0.000115529	0.0027	0.00368562	N	0.8185	67587445	78633484	NIPA2P2	181068	intergenic	pseudogene	0.064	7	L81	Y	Pain intensity (PMID:38429522), cocaine use (GCST009384), smoking initiation (GCST007468)	N
43	p14.1	rs62268946	3	76194352	T	C	0.00746016	0.00127742	0.5452	5.211e-09	+++	6.22692e-07	0.0049	0.0240769	N	0.1544	67587445	78633484	ROBO2	0	intronic	protein_coding	3.878	5	L82	N	Pain intensity (PMID:38429522)	N
43	p14.1	rs3071072	3	77245653	CTT	C	0.0110316	0.00178245	0.7431	6.059e-10	++?	5.69111e-08	0.0011		N	0.178	67587445	78633484	ROBO2	0	intronic	protein_coding	0.945		L82	Y	Pain intensity (PMID:38429522)	N
43	p14.1	rs5850333	3	77607070	A	AC	0.00814959	0.00141732	0.2796	8.928e-09	+++	3.55702e-07	4.9e-05	0.436287	N	0.006903	67587445	78633484	ROBO2	0	intronic	protein_coding	3.247		L82	N	Pain intensity (PMID:38429522)	N
43	p14.1	rs4563376	3	78506900	A	G	-0.00823057	0.00137451	0.3107	2.126e-09	---	1.32546e-06	0.041	0.000645283	N	0.1875	67587445	78633484	MRPS17P3	67350	intergenic	pseudogene	1.142		L82	N	Pain intensity (PMID:38429522)	N
44	q13.12	rs638293	3	107318320	A	T	0.0108943	0.00177259	0.2745	7.951e-10	?++		5.4e-08	0.001013	N	0.1069	107152358	107551521	BBX	0	UTR5	protein_coding	0.037	3a	L83	Y	Multisite chronic pain (GCST012332)	N
45	q13.31	rs9837485	3	114106253	A	G	0.00724876	0.00127889	0.5511	1.444e-08	+++	0.000415076	0.023	6.90621e-05	N	0.5115	114018053	114131674	ZBTB20	0	ncRNA_intronic	protein_coding	4.174	7	L84	Y	Cannabis use disorder (GCST90296427), Alcohol use disorder (GCST90296428)	Y
46	q13.32	rs6438417	3	117547715	T	G	-0.00932604	0.00135082	0.3319	5.072e-12	---	0.000754241	0.00014	1.6099e-06	N	0.5472	117366248	117969134	LSAMP	0	ncRNA_intronic	protein_coding	1.595	7	L85	Y	Back pain (GCST90103484)	N
46	q13.32	rs7618118	3	117755473	T	C	0.0101502	0.0014896	0.2399	9.525e-12	+++	1.46225e-05	2.5e-05	0.00114675	N	0.7043	117366248	117969134	RP11-384F7.1	0	ncRNA_intronic	lincRNA	0.832	6	L85	N	Back pain (GCST90103484)	N
47	q22.2	rs9852075	3	135947144	T	G	-0.011905	0.00148664	0.7587	1.165e-15	---	3.22774e-06	4.9e-08	0.000152398	Y	0.4392	135468347	137771152	PCCB	22003	intergenic		2.197	6	L86	Y	Pain intensity (PMID:38429522), Multisite chronic pain (GCST008512; GCST012332)	N
47	q22.2	rs9835571	3	136523475	T	G	-0.00866872	0.00137402	0.3111	2.817e-10	---	3.68013e-06	0.0079	0.000335552	N	0.4621	135468347	137771152	RP11-731C17.1	3917	intergenic	pseudogene	3.25	7	L86	N	Pain intensity (PMID:38429522), Multisite chronic pain (GCST008512; GCST012332)	N
47	q22.2	rs4411833	3	137605747	A	G	-0.00937026	0.00163816	0.3703	1.067e-08	?--		0.052	1.16434e-09	Y	0.004452	135468347	137771152	HSPA8P9	4667	intergenic	pseudogene	5.534	7	L87	Y	Pain intensity (PMID:38429522), Multisite chronic pain (GCST008512; GCST012332)	N
48	q26.31	rs556464	3	173113680	C	G	-0.00787814	0.00127664	0.4583	6.797e-10	---	0.00525848	2.3e-06	0.001226	N	0.2883	173019407	173130573	NLGN1	393	upstream	protein_coding	10.38	4	L88	Y	Pain (pleiotropy) (GCST90104572)	N
49	q26.33	rs12696498	3	182521143	T	G	0.00845073	0.0013532	0.6704	4.232e-10	+++	0.00020932	0.005	1.87491e-05	N	0.6268	182446674	182831612	ATP11B	0	intronic	protein_coding	0.575	6	L89	Y	Pain intensity (PMID:38429522), Smoking initiation (ever regular vs never regular) (GCST007474)	N
50	q29	rs145646459	3	196937941	T	TTA	-0.0118837	0.00216225	0.1532	3.884e-08	--?	0.00219211	1.9e-06		N	0.1717	196716738	197050392	DLG1	0	intronic	protein_coding	6.087		L90	Y	Smoking initiation (GCST90243968)	Y
51	p16.3	rs13118508	4	1129620	A	G	-0.007981	0.00135134	0.6686	3.501e-09	---	5.99323e-06	0.0036	0.00602282	N	0.4435	1000138	3448228	TMED11P	0	ncRNA_intronic	pseudogene	0.652	7	L91	Y	Back pain (GCST90103484)	N
51	p16.3	rs13131466	4	1761543	T	C	0.0106826	0.00189644	0.7757	1.773e-08	?++		2e-05	0.000207114	N	0.6342	1000138	3448228	TACC3	14644	intergenic		1.956	2b	L92	Y	Back pain (GCST90103484)	N
51	p16.3	rs1475974	4	2942073	T	C	0.0102261	0.00134184	0.659	2.519e-14	+++	1.97144e-07	1.2e-05	0.000319257	N	0.577	1000138	3448228	NOP14	0	ncRNA_exonic	protein_coding	2.256		L93	Y	Pain intensity (PMID:38429522), cigarettes per day (GCST008809)	N
51	p16.3	rs2298971	4	3200079	A	G	0.00824243	0.00127829	0.5488	1.131e-10	+++	5.07518e-06	0.0013	0.000795848	N	0.6632	1000138	3448228	HTT	0	intronic	protein_coding	1.66	6	L93	N	Pain intensity (PMID:38429522), cigarettes per day (GCST008809)	N
51	p16.3	rs73193346	4	3286505	A	G	0.0132725	0.00193336	0.1235	6.663e-12	+++	1.58359e-08	0.00035	0.00922614	Y	0.1117	1000138	3448228	RGS12	8249	intergenic		1.429	3a	L94	Y	Pain intensity (PMID:38429522), cigarettes per day (GCST008809)	N
52	p15.2	rs34811474	4	25408838	A	G	-0.0137494	0.00151944	0.2266	1.443e-19	---	1.88225e-09	4.2e-11	0.00200286	Y	0.02634	25111387	28873007	ANAPC4	0	exonic	protein_coding	23.7	6	L95	Y	Pain intensity (PMID:38429522), Multisite chronic pain (GCST008512; GCST012332)	N
52	p15.2	rs1024120	4	28400119	T	C	-0.00793803	0.00139386	0.7043	1.231e-08	---	0.00163394	0.00077	0.000777034	N	0.9554	25111387	28873007	RP11-180C1.1	0	intronic	protein_coding	1.843	7	L96	Y	Cannabis use disorder (GCST90296427)	Y
53	p15.1	rs66944385	4	34258430	T	C	0.0135118	0.00232881	0.0812	6.541e-09	+++	2.59429e-05	0.013	0.000928496	N	0.5595	33642313	34493677	RP11-548L20.1	0	ncRNA_intronic	lincRNA	1.523	6	L97	Y	Smoking initiation (GCST90243968), Insomnia (GCST007988)	Y
54	p14	rs13102095	4	38626522	T	C	-0.00732537	0.00133504	0.3484	4.09e-08	---	0.00386898	0.00016	0.00411728	N	0.6977	38537708	38900397	RP11-617D20.1	0	ncRNA_exonic	antisense	13.37	7	L98	Y	Smoking initiation (GCST90243968)	Y
55	q12	rs12505880	4	56307155	A	C	0.00908766	0.0016257	0.3568	2.271e-08	++?	7.01282e-07	0.0039		N	0.1931	56046659	56544248	TMEM165	0	intronic	protein_coding	0.213	3a	L99	Y	Pain (pleiotropy) (GCST90104572)	N
56	q13.1	rs1376310	4	62765983	A	G	-0.00705783	0.00127306	0.5184	2.963e-08	---	0.00477529	0.00047	0.000947218	N	0.8229	62467185	63371512	LPHN3	0	intronic	protein_coding	4.612	6	L100	N	Smoking initiation (GCST90243968), Insomnia (GCST007988)	Y
56	q13.1	rs55776420	4	62887838	T	TA	0.0107841	0.00188468	0.1311	1.05e-08	+++	0.00173491	3.1e-05	0.00812643	N	0.4904	62467185	63371512	LPHN3	0	intronic	protein_coding	0.165		L100	Y	Smoking initiation (GCST90243968), Insomnia (GCST007988)	Y
56	q13.1	rs13122283	4	62993563	A	G	-0.00719837	0.00129958	0.3979	3.035e-08	---	2.1916e-05	0.018	0.00337614	N	0.468	62467185	63371512	RP11-84A1.3	0	ncRNA_intronic	antisense	10.53	7	L100	N	Smoking initiation (GCST90243968), Insomnia (GCST007988)	Y
57	q13.2	rs62305487	4	67063529	T	C	0.00849284	0.0014233	0.2758	2.415e-09	+++	5.23117e-09	0.077	0.00908657	Y	0.01479	67041359	68058681	RP11-25H12.1	47798	intergenic	lincRNA	11.66	5	L101	Y	Pain intensity (PMID:38429522), Pain (pleiotropy) (GCST90104572)	N
57	q13.2	rs17087844	4	67863736	T	C	-0.00821947	0.0012777	0.5464	1.252e-10	---	4.65567e-07	1.1e-06	0.220103	N	0.009717	67041359	68058681	RNU6-699P	100646	intergenic	snRNA	0.178	5	L102	Y	Pain intensity (PMID:38429522), Pain (pleiotropy) (GCST90104572)	N
58	q21.21	rs71662898	4	81147550	A	ATTTTCT	-0.00795857	0.0013464	0.3363	3.402e-09	---	0.000123359	0.0091	0.000172012	N	0.6979	81073276	81167372	PRDM8	22066	intergenic		1.642		L103	Y	Insomnia (GCST90131901)	Y
59	q24	rs13107325	4	103188709	T	C	0.0248834	0.00273685	0.0573	9.679e-20	+++	1.10534e-15	2.3e-13	0.699715	Y	2.016e-08	102321252	104069822	SLC39A8	0	exonic	protein_coding	23.1	5	L104	Y	Pain intensity (PMID:38429522), Multisite chronic pain (GCST008512; GCST012332, GCST012334)	N
60	q25	rs3934797	4	112467612	A	G	-0.00924092	0.0016756	0.1746	3.481e-08	---	0.00854007	2.4e-05	0.00597806	N	0.3874	112167666	112516337	RP11-255I10.1	5397	intergenic	pseudogene	2.499	6	L105	Y	Pain (pleiotropy) (GCST90104572)	N
61	q28.2	rs72516830	4	130244072	A	AC	0.0105651	0.00154393	0.2167	7.747e-12	+++	2.15314e-08	0.03	6.75367e-05	Y	0.07767	130127544	130366552	RP11-419L4.1	17894	intergenic	lincRNA	2.859		L106	Y	Pain intensity (PMID:38429522)	N
62	q31.1	rs34236292	4	140786038	T	G	-0.0107636	0.00166774	0.3213	1.086e-10	--?	7.47066e-06	3.2e-06		N	0.7506	140725423	140977925	MAML3	0	intronic	protein_coding	2.548	2b	L107	N	Pain intensity (PMID:38429522), Multisite chronic pain (GCST008512)	N
62	q31.1	rs12505942	4	140906390	T	C	0.0138862	0.00134257	0.6598	4.494e-25	+++	6.78808e-16	7.1e-08	1.2059e-05	Y	0.04069	140725423	140977925	MAML3	0	intronic	protein_coding	2.756	5	L107	Y	Pain intensity (PMID:38429522), Multisite chronic pain (GCST008512)	N
63	q32.1	rs1354252	4	160498966	T	G	-0.0100442	0.00180813	0.1447	2.768e-08	---	0.00295356	0.0061	9.46629e-05	N	0.6931	160396606	160604028	RP11-6C14.1	70785	intergenic	lincRNA	5.36		L108	Y	Alcohol consumption (GCST90101760)	Y
64	p15.31	rs17813430	5	7418378	T	C	-0.00992761	0.00153157	0.2216	9.041e-11	---	0.000483622	0.00015	7.52264e-05	N	0.9021	7187119	7447405	ADCY2	0	intronic	protein_coding	2.298	7	L109	Y	Smoking initiation (GCST90243968)	Y
65	p15.2	rs17239989	5	13013974	A	C	-0.00757307	0.00132512	0.3601	1.098e-08	---	1.05203e-06	0.017	0.0105216	N	0.1815	12778508	13365841	RP11-419C19.2	0	ncRNA_intronic	lincRNA	0.136	6	L110	Y	Smoking initiation (GCST90243968)	Y
66	p13.3	rs56070621	5	30825684	A	T	0.0113424	0.00128701	0.5757	1.217e-18	+++	6.57195e-07	1.2e-05	3.61601e-09	Y	0.5921	30567499	30914671	RPL19P11	227987	intergenic	pseudogene	2.537	7	L111	Y	Pain (FinnGen)	N
67	p12	rs145678215	5	45116428	T	C	-0.0101246	0.00175257	0.1561	7.616e-09	---	3.14853e-06	0.2	7.31223e-05	N	0.05717	44595088	46115369	RP11-357F12.1	17678	intergenic	lincRNA	0.669	7	L112	Y	Smoking initiation (GCST90243968)	Y
68	q11.2	rs62359143	5	57242700	T	C	-0.0086643	0.00143615	0.268	1.61e-09	---	0.000204142	0.0014	0.000418004	N	0.9741	57092821	57338413	RP11-478P10.1	47710	intergenic	lincRNA	3.059	7	L113	Y	Pain intensity (PMID:38429522)	N
69	q14.3	rs1027430	5	92395690	A	G	0.00923857	0.00139661	0.7063	3.712e-11	+++	5.35618e-06	0.0015	0.000219806	N	0.7125	92144478	94253296	CTD-2091N23.1	0	ncRNA_intronic	lincRNA	1.387		L114	Y	Pain intensity (PMID:38429522)	N
69	q14.3	rs112161672	5	93321799	A	G	-0.0166611	0.00232567	0.1287	7.809e-13	--?	1.47198e-08	9.2e-06		Y	0.5114	92144478	94253296	FAM172A	0	intronic	protein_coding	0.741	7	L115	Y	Pain intensity (PMID:38429522)	N
69	q14.3	rs42756	5	94198498	T	C	0.00865669	0.00146129	0.746	3.144e-09	+++	8.32658e-05	0.0026	0.00100286	N	0.8689	92144478	94253296	MCTP1	0	intronic	protein_coding	4.218		L116	Y	Pain intensity (PMID:38429522)	N
70	q21.2	rs34073570	5	103998895	CT	C	-0.0101442	0.00161558	0.3987	3.404e-10	?--		1e-10	0.0133835	Y	0.00353	103044989	104996076	RP11-6N13.1	0	ncRNA_intronic	lincRNA	1.733		L117	Y	Multisite chronic pain (GCST012332)	N
71	q21.3	rs10065099	5	109177378	T	C	-0.00801322	0.00143683	0.2676	2.445e-08	---	0.0162355	0.036	2.54724e-07	N	0.05975	108652105	109231379	MAN2A1	0	intronic	protein_coding	2.388	6	L118	Y	Osteoarthritis (GCST90134288)	N
72	q22.3	rs41236	5	113655761	A	G	-0.00915847	0.00164721	0.6392	2.692e-08	?--		7.4e-05	9.52796e-05	N	0.9001	113393781	113833017	KCNN2	40880	intergenic		2.017	2b	L119	Y	Pain (pleiotropy) (GCST90104572)	N
73	q23.1	rs1122319	5	119921283	A	C	0.00730362	0.00133913	0.6561	4.929e-08	+++	0.000122343	7.7e-05	0.0975731	N	0.1839	119873621	120477398	PRR16	0	intronic	protein_coding	3.228		L120	N	Pain intensity (PMID:38429522), Multisite chronic pain (GCST008512)	N
73	q23.1	rs2122194	5	120088654	A	G	-0.0145722	0.00172411	0.7144	2.869e-17	--?	1.91758e-15	0.0001		Y	0.008853	119873621	120477398	CTD-2334D19.1	28258	intergenic	lincRNA	0.385		L120	Y	Pain intensity (PMID:38429522), Multisite chronic pain (GCST008512)	N
74	q31.1	rs35096828	5	133897439	T	C	0.0112264	0.0014283	0.7273	3.85e-15	+++	2.44885e-10	8.5e-05	0.00101873	Y	0.1037	133793417	134306784	JADE2	0	intronic	protein_coding	4.866	4	L121	Y	Pain intensity (PMID:38429522)	N
75	q31.3	rs246039	5	140331337	A	G	0.00897855	0.00128706	0.4242	3.04e-12	+++	5.64869e-07	0.009	1.08138e-05	N	0.2793	139729152	141337126	PCDHA1	0	intronic	protein_coding	1.287		L122	Y	Smoking initiation (GCST90243968)	Y
75	q31.3	rs9324858	5	141264461	T	C	-0.0074764	0.00127258	0.4877	4.217e-09	---	0.00128076	0.00062	0.000396068	N	0.9441	139729152	141337126	PCDH1	5649	intergenic		6.471	5	L123	Y	Smoking initiation (GCST90243968)	Y
76	q33.2	rs2963998	5	153177053	T	C	-0.00899552	0.00127578	0.5375	1.774e-12	---	6.30382e-10	0.0053	0.00166548	Y	0.04582	153053621	153483653	GRIA1	0	intronic	protein_coding	2.784		L124	Y	Pain intensity (PMID:38429522)	N
77	q34	rs1946247	5	160836620	T	G	-0.0110025	0.00185854	0.1355	3.219e-09	---	0.00529779	5.9e-08	0.0336372	N	0.03621	160571458	161234805	GABRB2	0	intronic	protein_coding	2.186	5	L125	N	Multisite chronic pain (GCST012332)	N
77	q34	rs62381583	5	160941481	A	G	0.00899204	0.00147435	0.7527	1.065e-09	+++	0.00180073	3.8e-07	0.0153028	N	0.1215	160571458	161234805	GABRB2	0	intronic	protein_coding	10.87	6	L125	Y	Multisite chronic pain (GCST012332)	N
78	q34	rs139399164	5	167415224	T	G	0.0202054	0.00358189	0.0326	1.691e-08	+++	5.64316e-06	0.0067	0.0135966	N	0.3285	167398432	170894847	TENM2	0	intronic	protein_coding	5.878	3a	L126	Y	Pain intensity (PMID:38429522), Pain sensitivity (PMC9393798), Response to buprenorphine in opioid use disorder (GCST90044777)	N
78	q34	rs150457448	5	170360511	C	G	0.00754142	0.00135175	0.669	2.418e-08	+++	0.000618221	0.0004	0.00681522	N	0.7996	167398432	170894847	RANBP17	0	intronic	protein_coding	9.879	6	L127	N	Migraine disorder (GCST90244660)	N
78	q34	rs34772405	5	170831912	T	C	-0.00922455	0.00127746	0.5454	5.176e-13	---	0.000224838	9.5e-08	0.000410204	N	0.2963	167398432	170894847	NPM1	0	intronic	protein_coding	0.44	5	L127	Y	Migraine disorder (GCST90244660)	N
79	q35.2	rs1966265	5	176516631	A	G	0.00823903	0.00150402	0.2333	4.297e-08	+++	2.19981e-06	0.016	0.0226929	N	0.183	176328196	176772737	FGFR4	0	exonic	protein_coding	6.204	5	L128	Y	Pain intensity (PMID:38429522), Migraine (GCST90102553)	N
80	p24.1	rs62395444	6	11972254	T	C	0.0113844	0.00192206	0.1252	3.163e-09	+++	0.0566001	5.2e-05	1.22445e-05	N	0.1319	11913828	13124594	RP11-456H18.1	18321	intergenic	antisense	2.792	5	L129	Y	Pain (pleiotropy) (GCST90104572)	N
80	p24.1	rs12202891	6	12768218	T	C	-0.00964637	0.00162506	0.1889	2.928e-09	---	0.000146686	4.2e-05	0.0164248	N	0.4234	11913828	13124594	PHACTR1	0	intronic	protein_coding	0.012	7	L130	Y	Pain (pleiotropy) (GCST90104572)	N
80	p24.1	rs1953088	6	12925936	A	C	-0.00725286	0.00132618	0.6412	4.528e-08	---	0.00490773	7.1e-07	0.0772734	N	0.05746	11913828	13124594	PHACTR1	0	intronic	protein_coding	1.232	7	L130	N	Pain (pleiotropy) (GCST90104572)	N
81	p22.3	rs34292681	6	17014588	A	G	-0.0087426	0.00154627	0.2158	1.566e-08	---	0.000588033	0.00026	0.00666653	N	0.7622	16921776	17073209	STMND1	87900	intergenic		0.539	7	L131	Y	Smoking initiation (GCST90243968)	Y
82	p22.2	rs36085954	6	26354464	A	G	0.0151165	0.00236381	0.1285	1.601e-10	?++		8.4e-05	3.47792e-07	N	0.467	25357564	29612837	RNU6-1259P	1199	intergenic	snRNA	5.472	4	L132	N	Pain intensity (PMID:38429522), Pain (pleiotropy) (GCST90104572)	N
82	p22.2	rs2237235	6	26391395	A	G	0.0107732	0.00180364	0.7401	2.33e-09	?++		0.00056	6.52409e-07	N	0.3224	25357564	29612837	BTN2A2	0	UTR3	protein_coding	11.26	6	L132	N	Pain intensity (PMID:38429522), Pain (pleiotropy) (GCST90104572)	N
82	p22.2	rs12201477	6	27264344	T	C	-0.0128143	0.00233539	0.0807	4.096e-08	---	0.0065594	0.097	3.44239e-07	N	0.04917	25357564	29612837	POM121L2	0	intronic	protein_coding	1.079	4	L132	N	Pain intensity (PMID:38429522), Pain (pleiotropy) (GCST90104572)	N
82	p22.2	rs2113864070	6	27740110	CA	C	0.0171099	0.00243661	0.1118	2.183e-12	+?+	0.000247776		2.84453e-10	Y	0.04843	25357564	29612837	RSL24D1P1	8287	intergenic	pseudogene	7.26		L132	Y	Pain intensity (PMID:38429522), Pain (pleiotropy) (GCST90104572)	N
82	p22.2	rs6456886	6	29010587	A	G	-0.00805771	0.00147415	0.7526	4.596e-08	---	0.000297187	0.0066	0.00187284	N	0.8795	25357564	29612837	OR2W1	1402	intergenic		3.522	7	L133	N	Pain (pleiotropy) (GCST90104572)	N
82	p22.2	rs3131857	6	29606794	T	C	-0.0109723	0.00161429	0.4006	1.066e-11	?--		0.00014	7.62641e-09	Y	0.1967	25357564	29612837	SUMO2P1	2673	intergenic	pseudogene	1.494		L133	Y	Pain (pleiotropy) (GCST90104572), Pain (FinnGen)	N
83	p21.32	rs9278029	6	33341424	A	C	0.00942917	0.00134434	0.6616	2.311e-12	+++	2.42167e-06	0.0039	6.86768e-06	N	0.4523	33200578	36608267	LYPLA2P1	7403	intergenic	pseudogene	2.182	6	L134	Y	Pain intensity (PMID:38429522), Insomnia (GCST90131901, GCST007988)	N
83	p21.32	rs3818528	6	33661091	A	G	-0.0105505	0.00134231	0.6595	3.84e-15	---	1.68441e-07	1.8e-07	0.00154088	N	0.2404	33200578	36608267	ITPR3	0	intronic	protein_coding	3.455	1f	L135	Y	Pain intensity (PMID:38429522), Insomnia (GCST90131901, GCST007988)	N
83	p21.32	rs9469599	6	33794258	T	G	0.0131533	0.00235006	0.0796	2.181e-08	+++	0.00658692	2.5e-06	0.0197665	N	0.1608	33200578	36608267	MLN	22469	intergenic		2.206	5	L136	Y	Pain intensity (PMID:38429522), Insomnia (GCST90131901, GCST007988)	N
83	p21.32	rs11752353	6	33795628	A	G	-0.0100775	0.00176985	0.1524	1.243e-08	---	0.0434351	5.7e-10	0.0766867	Y	0.00135	33200578	36608267	MLN	23839	intergenic		8.832	4	L137	Y	Pain intensity (PMID:38429522), Multisite chronic pain (GCST012332), Insomnia (GCST90131901, GCST007988)	N
83	p21.32	rs12202516	6	34490146	A	G	-0.0101912	0.00162178	0.1899	3.296e-10	---	9.16236e-05	0.00022	0.00105862	N	0.9116	33200578	36608267	PACSIN1	0	intronic	protein_coding	0.86	7	L137	N	Pain intensity (PMID:38429522), Multisite chronic pain (GCST008512)	N
83	p21.32	rs9296130	6	34774449	C	G	-0.0157944	0.00164679	0.8175	8.731e-22	---	1.14304e-13	1.2e-08	0.000578535	Y	0.02412	33200578	36608267	UHRF1BP1	0	intronic	protein_coding	0.277	3a	L138	Y	Pain intensity (PMID:38429522), Multisite chronic pain (GCST008512)	N
83	p21.32	rs33959228	6	35259397	T	C	0.0278182	0.00417315	0.0238	2.621e-11	+++	0.000217329	9.6e-09	0.0296859	Y	0.03204	33200578	36608267	ZNF76	0	exonic	protein_coding	26.5	5	L138	N	Pain intensity (PMID:38429522), Multisite chronic pain (GCST008512)	N
83	p21.32	rs56077076	6	36364765	T	C	-0.00729131	0.00127381	0.5252	1.042e-08	---	6.99078e-05	0.00013	0.0349832	N	0.343	33200578	36608267	PXT1	0	intronic	protein_coding	13.1	5	L139	Y	Pain intensity (PMID:38429522), Multisite chronic pain (GCST008512)	N
84	p21.1	rs11444709	6	43116506	T	TA	-0.0105453	0.00158504	0.5306	2.878e-11	?--		4.8e-05	1.00679e-07	N	0.428	42878706	43364494	PTK7	0	intronic	protein_coding	1.784		L140	Y	Osteoarthritis (GCST90271770)	N
84	p21.1	rs11967948	6	43132792	T	C	-0.0110448	0.00190461	0.8721	6.663e-09	---	0.00183171	0.014	8.39093e-06	N	0.3744	42878706	43364494	PTK7	3334	intergenic		0.962	5	L140	N	Osteoarthritis (GCST90271770)	N
85	q12	rs56016894	6	69610898	A	T	-0.0121471	0.00198418	0.8837	9.26e-10	---	6.28108e-10	0.0001	0.643719	Y	0.0003179	69449455	70203760	BAI3	0	intronic	protein_coding	1.651	6	L141	Y	Pain intensity (PMID:38429522)	N
86	q13	rs9352202	6	76022082	A	G	-0.00718255	0.00130355	0.391	3.598e-08	---	9.55333e-06	0.0046	0.0252994	N	0.3202	75876767	76445075	FILIP1	0	intronic	protein_coding	0.067	6	L142	Y	Migraine disorder (GCST90244660)	N
87	q14.2	rs12193842	6	84322158	A	C	-0.0121038	0.00136473	0.681	7.351e-19	---	1.56879e-11	1.7e-06	0.000156571	Y	0.1368	84195580	84466444	SNAP91	0	intronic	protein_coding	4.453	7	L143	Y	Pain intensity (PMID:38429522)	N
88	q16.1	rs62414081	6	93660102	A	C	0.00747923	0.00134157	0.6587	2.473e-08	+++	0.00920794	0.025	1.5579e-06	N	0.1496	93570222	98886500	ATF1P1	61802	intergenic	pseudogene	0.339	6	L144	Y	Smoking initiation (GCST90243968)	Y
88	q16.1	rs12524320	6	94647235	A	G	0.00875054	0.00127857	0.5499	7.727e-12	+++	0.000129812	8.9e-07	0.00164702	N	0.3927	93570222	98886500	RP11-524K14.1	48106	intergenic	lincRNA	2.567	7	L145	Y	Smoking initiation (GCST90243968)	Y
88	q16.1	rs806131	6	94841667	T	C	-0.00981704	0.00166588	0.8228	3.782e-09	---	2.84887e-05	0.018	0.000311129	N	0.5011	93570222	98886500	RP3-463P15.1	31970	intergenic	lincRNA	0.334	5	L145	N	Smoking initiation (GCST90243968)	Y
88	q16.1	rs1206157	6	97551806	A	G	-0.00789007	0.00141424	0.7184	2.424e-08	---	0.000392705	0.022	0.000148847	N	0.5833	93570222	98886500	KLHL32	0	intronic	protein_coding	6.51	6	L146	Y	Pain intensity (PMID:38429522)	N
88	q16.1	rs2503775	6	98521600	A	G	0.0124229	0.00191357	0.1265	8.484e-11	+++	2.96043e-08	0.028	0.000657915	Y	0.08115	93570222	98886500	RP11-436D23.1	0	ncRNA_intronic	lincRNA	0.54		L147	Y	Pain intensity (PMID:38429522)	N
89	q16.3	rs11285463	6	105392004	A	AT	0.00981146	0.00156333	0.5428	3.465e-10	++?	0.000150545	2.9e-07		N	0.2566	105001954	107456847	LINC00577	3601	intergenic	lincRNA	4.498		L148	Y	Rheumatoid arthritis (GCST002318)	N
89	q16.3	rs9480737	6	107442277	A	G	0.00865583	0.00134679	0.6641	1.303e-10	+++	0.000349243	0.026	1.19969e-07	N	0.1075	105001954	107456847	BEND3	5803	intergenic		1.713	5	L149	Y	Smoking initiation (GCST90243968)	Y
90	q21	rs697642	6	112053105	A	G	0.0163592	0.00244678	0.0729	2.29e-11	+++	0.00335357	4.7e-07	0.000237493	N	0.2478	111968250	112306397	FYN	0	intronic	protein_coding	6.672	4	L150	Y	Migraine (GCST90102553)	N
91	q22.32	rs1490384	6	126851160	T	C	-0.00828768	0.00127229	0.4938	7.312e-11	---	1.13082e-05	0.00067	0.000531337	N	0.8123	126545036	130461810	MIR588	45300	intergenic	miRNA	18.6	7	L151	Y	Smoking initiation (GCST90243968)	Y
91	q22.32	rs4337952	6	129338913	A	C	0.00884432	0.00138236	0.6956	1.571e-10	+++	5.1487e-05	1.3e-05	0.00724403	N	0.4327	126545036	130461810	LAMA2	0	intronic	protein_coding	4.478	6	L152	Y	Pain (pleiotropy) (GCST90104572)	N
91	q22.32	rs6902109	6	130316559	A	G	0.00703438	0.00128388	0.4327	4.289e-08	+++	2.48257e-05	0.0033	0.0215229	N	0.4314	126545036	130461810	L3MBTL3	18284	intergenic		1.141	6	L153	Y	Pain intensity (PMID:38429522)	N
92	q24.3	rs12199557	6	147972241	T	C	-0.00699511	0.00127253	0.5115	3.87e-08	---	1.44901e-05	0.018	0.00573495	N	0.403	147893472	148018479	SAMD5	0	intronic	protein_coding	6.611	5	L154	Y	Insomnia (GCST90131901)	Y
93	q25.1	rs4870063	6	152244647	A	C	-0.0109957	0.00133282	0.6491	1.589e-16	---	1.77748e-10	0.02	4.58058e-08	Y	0.01887	152171113	152398345	ESR1	0	intronic	protein_coding	9.39	7	L155	Y	Pain intensity (PMID:38429522), Pain (FinnGen), Osteoporosis (GCST90086122)	N
94	q26	rs2846539	6	163027995	T	C	0.00857236	0.00135446	0.6716	2.467e-10	+++	2.35101e-06	0.0015	0.00249609	N	0.4844	162890378	165318519	PARK2	0	intronic	protein_coding	1.45		L156	N	Pain intensity (PMID:38429522), Insomnia (GCST90131901, GCST007988)	N
94	q26	rs370097730	6	163033062	G	GA	0.00962791	0.00149131	0.2391	1.072e-10	+++	9.63843e-08	0.015	0.000856525	N	0.1503	162890378	165318519	PARK2	0	intronic	protein_coding	1.497		L156	Y	Pain intensity (PMID:38429522), Insomnia (GCST90131901, GCST007988)	N
94	q26	rs1566006	6	165063676	T	C	-0.00883462	0.00158241	0.5102	2.368e-08	?--		0.0035	7.57914e-07	N	0.1771	162890378	165318519	RP11-300M24.1	177562	intergenic	lincRNA	3.892		L157	Y	Smoking initiation (GCST90243968)	Y
95	p22.3	rs112302425	7	1080772	G	GGA	0.0100619	0.00135551	0.6726	1.145e-13	+++	0.000308657	2.1e-07	3.9626e-05	N	0.4181	964207	4010726	C7orf50	0	ncRNA_intronic	protein_coding	9.006		L158	N	Pain intensity (PMID:38429522), Neuropathic pain in head and neck cancer (GCST005934)	N
95	p22.3	rs138324521	7	1917144	T	C	-0.0161122	0.00160576	0.1949	1.077e-23	---	8.40204e-15	4.2e-05	6.01742e-08	Y	0.05822	964207	4010726	MAD1L1	0	intronic	protein_coding	11.47	5	L158	Y	Pain intensity (PMID:38429522), Neuropathic pain in head and neck cancer (GCST005934)	N
95	p22.3	rs872464	7	2034562	A	G	0.00926172	0.00129661	0.4034	9.149e-13	+++	1.91548e-07	2.9e-05	0.00312133	N	0.3142	964207	4010726	MAD1L1	0	intronic	protein_coding	3.322		L159	N	Pain intensity (PMID:38429522), Neuropathic pain in head and neck cancer (GCST005934)	N
95	p22.3	rs2644312	7	2841164	A	G	-0.00777967	0.00136798	0.3162	1.29e-08	---	9.412e-07	0.0023	0.0649337	N	0.1109	964207	4010726	GNA12	0	intronic	protein_coding	0.511		L159	Y	Pain intensity (PMID:38429522), Neuropathic pain in head and neck cancer (GCST005934)	N
95	p22.3	rs68135341	7	3395033	T	C	0.01048	0.00141546	0.2808	1.317e-13	+++	0.00164562	5.4e-08	1.62159e-05	N	0.198	964207	4010726	SDK1	0	intronic	protein_coding	0.271	4	L160	Y	Pain intensity (PMID:38429522), Neuropathic pain in head and neck cancer (GCST005934)	N
95	p22.3	rs7804059	7	3519120	T	C	0.0142217	0.00189018	0.8698	5.317e-14	+++	1.03858e-05	0.00018	1.16437e-06	N	0.7809	964207	4010726	SDK1	0	intronic	protein_coding	10.49	6	L161	Y	Pain intensity (PMID:38429522), Neuropathic pain in head and neck cancer (GCST005934)	N
95	p22.3	rs2568524	7	3685496	A	T	-0.0122726	0.00192844	0.7859	1.969e-10	?--		8.6e-05	4.26167e-07	N	0.4811	964207	4010726	SDK1	0	intronic	protein_coding	0.214	6	L162	Y	Pain intensity (PMID:38429522), Neuropathic pain in head and neck cancer (GCST005934)	N
95	p22.3	rs12535195	7	3841811	T	G	0.0103831	0.00186982	0.7665	2.802e-08	?++		0.0033	1.0223e-06	N	0.195	964207	4010726	SDK1	0	intronic	protein_coding	1.928	5	L163	Y	Pain intensity (PMID:38429522), Neuropathic pain in head and neck cancer (GCST005934)	N
96	p21.3	rs59700575	7	13691252	A	G	-0.00764903	0.0013659	0.682	2.139e-08	---	0.000400205	1.1e-05	0.0732605	N	0.1568	13678712	13779259	AC011288.2	0	ncRNA_intronic	lincRNA	9.22	7	L164	Y	Smoking initiation (GCST90243968)	Y
97	p15.3	rs28541530	7	21531161	A	G	-0.0121092	0.00136564	0.6818	7.522e-19	---	8.14364e-09	1e-06	2.88144e-06	Y	0.8022	21396724	21709652	SP4	0	intronic	protein_coding	2.916	6	L165	Y	Pain intensity (PMID:38429522), Multisite chronic pain (GCST008512; GCST012332)	N
98	p15.2	rs7779546	7	28126159	T	C	-0.0136896	0.00248001	0.9292	3.393e-08	---	0.012783	0.0081	9.37001e-06	N	0.3047	27953364	28257321	JAZF1	0	intronic	protein_coding	7.58	3a	L166	Y	Endometriosis (GCST90258642)	N
99	p14.3	rs10233473	7	32265007	T	C	0.0112077	0.00187827	0.2305	2.415e-09	?++		3.6e-07	0.00073514	N	0.1936	32247925	32457821	PDE1C	0	intronic	protein_coding	2.454	5	L167	Y	Smoking behaviour (GCST009096)	Y
100	p13	rs10275309	7	44327049	T	C	0.00811001	0.00143312	0.2698	1.526e-08	+++	0.00116746	2.8e-06	0.0555763	N	0.1265	44268785	44387014	CAMK2B	0	intronic	protein_coding	2.699	5	L168	Y	Osteoarthritis (GCST002155)	N
101	p12.2	rs2661876	7	49874533	A	C	0.00720394	0.00130957	0.6186	3.786e-08	+++	9.05023e-07	0.3	0.000525969	N	0.03081	49823972	50096782	VWC2	0	intronic	protein_coding	4.771	7	L169	Y	Pain intensity (PMID:38429522), cigarettes smoked per day (GCST007459)	N
102	q11.22	rs78060431	7	69362946	A	G	0.0200226	0.00361419	0.032	3.033e-08	+++	8.46164e-05	0.17	2.45595e-05	N	0.1082	68894722	72658989	AUTS2	0	intronic	protein_coding	0.819	6	L170	Y	Smoking initiation (GCST011703)	Y
102	q11.22	rs75141388	7	71676800	T	G	-0.0198087	0.00287541	0.0516	5.633e-12	---	2.22773e-07	0.017	1.81865e-05	N	0.1792	68894722	72658989	CALN1	0	intronic	protein_coding	2.74		L171	Y	Smoking cessation (GCST90243968)	Y
103	q21.11	rs4730347	7	78138925	A	G	0.00924495	0.00127481	0.4679	4.105e-13	+++	8.08619e-06	1.1e-05	0.000213093	N	0.8325	78094640	78176624	MAGI2	0	intronic	protein_coding	5.787	6	L172	Y	Opioid use disorder (GCST90296425)	Y
104	q21.11	rs71117513	7	86261480	T	TA	-0.00908285	0.00163067	0.648	2.553e-08	--?	0.00534283	2.4e-07		N	0.06442	85767754	86625044	GRM3	11749	intergenic		11.84		L173	Y	Psoriatic arthritis (GCST007043)	N
105	q21.3	rs4236530	7	95847348	T	C	-0.0105625	0.00132495	0.6397	1.565e-15	---	0.000488374	8.5e-08	5.05836e-07	N	0.2806	95648166	96677979	SLC25A13	0	intronic	protein_coding	6.772	7	L174	Y	Multisite chronic pain (GCST012332)	N
105	q21.3	rs11769618	7	96621498	T	C	-0.0101555	0.00177948	0.8496	1.148e-08	---	0.00303848	1.4e-05	0.00876214	N	0.3769	95648166	96677979	DLX6-AS1	0	ncRNA_intronic	antisense	19.71	4	L175	Y	Multisite chronic pain (GCST012332)	N
106	q31.1	rs848387	7	108531167	T	C	-0.0106227	0.00180781	0.7538	4.194e-09	--?	7.8763e-06	0.00013		N	0.78	108522148	109235327	C7orf66	6522	intergenic		2.686		L176	Y	Smoking initiation (GCST90243968)	Y
106	q31.1	rs12672452	7	109137124	T	C	0.00837853	0.00128151	0.4398	6.244e-11	+++	5.31947e-08	0.00016	0.0392726	N	0.06877	108522148	109235327	AC073071.1	24913	intergenic	lincRNA	1.096	7	L177	Y	Smoking initiation (GCST90243968)	Y
107	q31.1	rs2040658	7	114138751	C	G	0.0145677	0.00128883	0.5802	1.273e-29	+++	2.1091e-18	5e-08	1.28419e-07	Y	0.03993	113530275	116720183	FOXP2	0	intronic	protein_coding	1.027	6	L178	Y	Pain intensity (PMID:38429522), Neck or shoulder pain (GCST010080), multisite chronic pain (GCST008512; GCST012332)	N
107	q31.1	rs78607823	7	114248919	T	C	0.0195844	0.00353509	0.0335	3.016e-08	+++	0.00380208	0.042	3.37194e-06	N	0.1821	113530275	116720183	FOXP2	0	intronic	protein_coding	6.555	7	L178	N	Pain intensity (PMID:38429522), Neck or shoulder pain (GCST010080), multisite chronic pain (GCST008512; GCST012332)	N
107	q31.1	rs2045293	7	114350102	T	C	0.00960788	0.00129208	0.4126	1.04e-13	+++	7.5021e-08	2.1e-06	0.00612816	N	0.1609	113530275	116720183	FOXP2	16274	intergenic		4.595	6	L178	N	Pain intensity (PMID:38429522), Neck or shoulder pain (GCST010080), multisite chronic pain (GCST008512; GCST012332)	N
107	q31.1	rs7797141	7	115052164	A	G	0.00985576	0.00170662	0.3125	7.714e-09	?++		0.00025	7.02846e-06	N	0.6159	113530275	116720183	RP11-222O23.1	91256	intergenic	pseudogene	1.545	5	L179	Y	Pain intensity (PMID:38429522), Neck or shoulder pain (GCST010080), multisite chronic pain (GCST008512; GCST012332)	N
107	q31.1	rs38857	7	116365413	T	C	0.00791889	0.00141763	0.2794	2.319e-08	+++	0.00995471	0.04	4.83226e-07	N	0.08276	113530275	116720183	MET	0	intronic	protein_coding	5.352	7	L180	Y	Pain intensity (PMID:38429522), Neck or shoulder pain (GCST010080), multisite chronic pain (GCST008512; GCST012332)	N
108	q31.32	rs3757540	7	121962558	T	C	-0.00831971	0.00131164	0.6217	2.247e-10	---	0.0146539	8.5e-06	3.21707e-05	N	0.2435	121937298	122020759	CADPS2	0	intronic	protein_coding	4.541		L181	Y	Osteoarthritis (GCST90271767)	N
109	q31.33	rs3824000	7	127502961	A	G	0.0147575	0.00249957	0.1129	3.543e-09	?++		8.6e-05	1.00323e-05	N	0.796	126944260	127836132	SND1	0	intronic	protein_coding	9.567		L182	N	Pain intensity (PMID:38429522), Smoking initiation (GCST007603)	N
109	q31.33	rs10487502	7	127600378	T	C	-0.0094596	0.00149891	0.2356	2.768e-10	---	1.3142e-11	0.025	0.0733888	Y	0.0008288	126944260	127836132	SND1	0	intronic	protein_coding	11.72	7	L182	Y	Pain intensity (PMID:38429522), Smoking initiation (GCST007603)	N
110	q34	rs17621014	7	140155800	T	C	0.0143397	0.00219228	0.0928	6.097e-11	+++	4.88048e-12	0.17	0.00389206	Y	0.0005101	140058376	140183018	MKRN1	0	intronic	protein_coding	13.84	4	L183	N	Pain intensity (PMID:38429522)	N
110	q34	rs79453306	7	140173170	A	G	0.0139608	0.00145123	0.7406	6.606e-22	+++	8.33614e-14	2.1e-06	1.20579e-05	Y	0.0888	140058376	140183018	MKRN1	0	intronic	protein_coding	5.32	7	L183	Y	Pain intensity (PMID:38429522)	N
111	q35	rs10081335	7	146659682	T	G	0.00906431	0.00131405	0.6252	5.281e-12	+++	2.41288e-05	0.0058	8.38687e-07	N	0.3446	146582565	146739888	CNTNAP2	0	intronic	protein_coding	0.427	7	L184	Y	Smoking status (GCST008687)	Y
112	q36.3	rs7802866	7	157689081	A	G	0.00913588	0.00167446	0.1749	4.878e-08	+++	0.000146753	0.087	0.000103288	N	0.2654	157674708	157755871	PTPRN2	0	intronic	protein_coding	0.413	5	L185	Y	Headache (GCST90281119)	N
113	p23.1	rs330050	8	9087679	C	G	-0.00793897	0.00127575	0.4627	4.884e-10	---	5.038e-09	0.02	0.012288	Y	0.02826	8088230	12341535	RP11-10A14.8	2843	intergenic	pseudogene	0.889	7	L186	N	Pain intensity (PMID:38429522), Osteoarthritis of the hip or knee (GCST007092), osteoarthritis (GCST007091, GCST007093)	N
113	p23.1	rs7814142	8	10637552	A	G	-0.00819288	0.00128455	0.5692	1.794e-10	---	5.91573e-09	0.008	0.0129846	Y	0.04101	8088230	12341535	SOX7	0	intronic	protein_coding	3.266	5	L186	N	Pain intensity (PMID:38429522), Pain (pleiotropy) (GCST90104572), Osteoarthritis (GCST90134286)	N
113	p23.1	rs59028984	8	11036127	T	C	0.0166399	0.00278074	0.9142	2.182e-09	++?	0.00030342	1e-06		N	0.2788	8088230	12341535	XKR6	0	intronic	protein_coding	1.614	6	L186	N	Pain intensity (PMID:38429522), Osteoarthritis of the hip or knee (GCST007092)	N
113	p23.1	rs7461062	8	11831948	T	C	-0.00905829	0.00127689	0.4571	1.302e-12	---	3.1751e-09	0.00099	0.00273149	Y	0.1017	8088230	12341535	DEFB136	0	intronic	protein_coding	2.607	3a	L186	Y	Pain intensity (PMID:38429522), Osteoarthritis of the hip or knee (GCST007092)	N
114	p12	rs76947678	8	36452534	A	G	0.0126174	0.00219548	0.0925	9.093e-09	+++	0.000249999	0.0066	0.000385141	N	0.832	35543181	36794427	RP11-962G15.1	0	ncRNA_intronic	lincRNA	0.27	7	L187	Y	Smoking initiation (GCST90243968)	Y
115	q12.3	rs2011689	8	64341554	A	G	0.00783136	0.00130132	0.3948	1.77e-09	+++	0.000432136	0.25	1.29655e-08	Y	0.007313	63846938	66484385	CTD-3046C4.1	0	ncRNA_intronic	lincRNA	10.84		L188	Y	Pain (FinnGen)	N
115	q12.3	rs2150445433	8	64851998	T	TAG	0.0124481	0.00227279	0.8686	4.315e-08	+?+	3.63548e-06		0.00198157	N	0.3144	63846938	66484385	RP11-32K4.1	0	ncRNA_intronic	antisense	0.43		L188	N	Pain (FinnGen)	N
115	q12.3	rs1514508	8	66229214	A	G	0.00910694	0.00157997	0.2035	8.236e-09	+++	4.52039e-06	0.033	0.00140017	N	0.2776	63846938	66484385	RP11-678D18.1	60612	intergenic	pseudogene	0.138		L189	Y	Pain (FinnGen)	N
116	q21.11	rs78864863	8	76645780	A	T	0.0187163	0.00341913	0.0359	4.393e-08	+++	0.00327719	0.018	3.15617e-05	N	0.4502	75764145	77548571	AC016194.1	52819	intergenic	miRNA	0.885	7	L190	Y	Smoking initiation (GCST90243968)	Y
117	q21.3	rs5893143	8	91906078	A	AT	-0.0099684	0.00168385	0.7051	3.212e-09	-?-	7.2453e-05		1.02353e-05	N	0.6874	91228721	92334136	NECAB1	0	intronic	protein_coding	2.776		L191	Y	Medication use (antimigraine preparations) (GCST90018997)	Y
118	q22.1	rs34358161	8	95610512	T	TA	-0.0105382	0.00166665	0.3221	2.562e-10	--?	2.05147e-06	2.9e-05		N	0.8314	95350450	95742139	RP11-267M23.7	3682	intergenic	pseudogene	0.071		L192	Y	Pain intensity (PMID:38429522), Insomnia (GCST90131901)	N
119	q22.3	rs10098039	8	106230510	A	G	0.00933338	0.00170628	0.8332	4.501e-08	+++	8.45617e-05	0.016	0.00199022	N	0.6394	106117391	106502453	RP11-127H5.1	0	intronic	protein_coding	4.165	7	L193	Y	Pain intensity (PMID:38429522), Insomnia (GCST90131901)	N
120	q23.3	rs57603195	8	115575638	A	T	0.00822209	0.00131029	0.3803	3.497e-10	+++	1.02127e-05	0.00021	0.00631452	N	0.5237	115016679	115863500	RP11-192P9.1	228243	intergenic	pseudogene	2.512	7	L194	Y	Smoking initiation (GCST90243968)	Y
121	q24.3	rs11167016	8	141995180	A	G	-0.00726739	0.00127342	0.4781	1.149e-08	---	0.000479173	3.7e-05	0.0221004	N	0.3904	141561857	142696491	PTK2	0	intronic	protein_coding	0.058	7	L195	Y	Multisite chronic pain (GCST012332)	N
121	q24.3	rs59918340	8	142232256	A	G	-0.0103454	0.00127281	0.5158	4.377e-16	---	1.39772e-10	0.00023	9.61214e-05	Y	0.1431	141561857	142696491	SLC45A4	0	intronic	protein_coding	2.221	4	L196	Y	Pain intensity (PMID:38429522), Multisite chronic pain (GCST008512)	N
121	q24.3	rs1566085	8	142624527	T	G	-0.0103712	0.00158654	0.5375	6.27e-11	?--		1.4e-05	9.88508e-07	N	0.7703	141561857	142696491	AC138647.1	95689	intergenic		2.44	5	L197	Y	Pain intensity (PMID:38429522), Multisite chronic pain (GCST008512)	N
122	p23	rs587791	9	10318490	T	G	0.0117287	0.0020814	0.1751	1.747e-08	?++		7.4e-05	6.15361e-05	N	0.958	10266786	14514321	PTPRD	0	intronic	protein_coding	0.795	3b	L198	Y	Smoking status (GCST008687)	Y
122	p23	rs10756056	9	10521839	A	C	0.00704515	0.00127261	0.5127	3.093e-08	+++	0.000532366	7.2e-05	0.0298099	N	0.4008	10266786	14514321	PTPRD	0	intronic	protein_coding	0.802	6	L198	N	Smoking status (GCST008687), Smoking initiation (GCST007468)	Y
122	p23	rs10959640	9	11225906	T	C	0.00783178	0.00127637	0.4596	8.463e-10	+++	0.00043416	3.7e-06	0.0118193	N	0.2893	10266786	14514321	RP11-23D5.1	49407	intergenic	lincRNA	0.052	7	L199	Y	Smoking initiation (GCST007468)	Y
122	p23	rs12004755	9	14159091	A	G	0.0102582	0.00182076	0.1423	1.762e-08	+++	6.67563e-07	0.0018	0.106709	N	0.07025	10266786	14514321	NFIB	0	intronic	protein_coding	2.798	4	L200	Y	Migraine (GCST90102553)	N
122	p23	rs10756553	9	14458975	A	G	-0.00702763	0.00127335	0.4787	3.401e-08	---	1.87977e-05	0.00069	0.0624008	N	0.2427	10266786	14514321	NFIB	59992	intergenic		1.728	7	L201	Y	Migraine (GCST90102553)	N
123	p21.3	rs10966547	9	24898113	A	G	0.00922503	0.00167484	0.1748	3.625e-08	+++	0.00144944	0.011	0.000146332	N	0.7098	24862969	25004127	RMRPP5	7353	intergenic	misc_RNA	1.607	7	L202	Y	Smoking initiation (GCST90243968)	Y
124	p21.1	rs13288673	9	31208005	A	T	-0.00911408	0.00138807	0.3	5.179e-11	---	4.83218e-05	0.021	7.335e-07	N	0.1963	31118965	31321155	RP11-572H4.1	41026	intergenic	pseudogene	5.37	7	L203	Y	Osteoarthritis (GCST90134288)	N
125	q21.2	rs11145538	9	80317808	A	G	0.0096119	0.00171457	0.709	2.072e-08	++?	0.000371155	1.1e-05		N	0.448	80287843	80908089	GNAQ	13194	intergenic		0.315	5	L204	Y	Smoking initiation (GCST90243968)	Y
126	q22.31	rs2895249	9	96365753	A	G	-0.010698	0.00130241	0.3929	2.134e-16	---	6.90847e-10	4.5e-08	0.0101212	Y	0.02864	95943304	96605924	PHF2	0	intronic	protein_coding	2.332	7	L205	Y	Pain intensity (PMID:38429522), Osteoarthritis of the hip or knee (GCST90034536)	N
127	q31.2	rs996826	9	108847224	A	G	-0.00869649	0.00158521	0.2017	4.115e-08	---	1.21778e-05	0.011	0.0113204	N	0.3829	108756219	109112349	RP11-6F6.1	20117	intergenic	lincRNA	5.539	6	L206	Y	Cannabis use disorder (GCST90296427)	Y
128	q33.1	rs10983783	9	120534666	T	G	-0.0079202	0.00127683	0.5426	5.534e-10	---	0.000130498	2.1e-05	0.00735902	N	0.488	120327400	131159086	RP11-281A20.2	11059	intergenic	lincRNA	4.943	6	L207	Y	Rheumatoid arthritis (GCST006048)	N
128	q33.1	rs1333907	9	122673388	A	T	-0.0109246	0.00130287	0.3921	5.072e-17	---	6.22525e-11	0.0045	4.6904e-07	Y	0.05241	120327400	131159086	RP11-360A18.2	23942	intergenic	lincRNA	16.41	6	L208	Y	Pain intensity (PMID:38429522), Self-reported risk-taking behaviour (GCST006810), Adventurousness (GCST007324)	N
128	q33.1	rs10818798	9	126032978	T	C	-0.0147068	0.00259516	0.0642	1.453e-08	---	0.015001	0.00011	0.000368638	N	0.486	120327400	131159086	STRBP	2122	intergenic		0.565	7	L209	Y	Pain intensity (PMID:38429522), Osteoarthritis (hip) (GCST90034522)	N
128	q33.1	rs10818937	9	127015440	T	C	0.00799802	0.00136183	0.3216	4.27e-09	+++	0.00367355	0.00055	0.000126829	N	0.7526	120327400	131159086	NEK6	4444	intergenic		0.359	7	L210	Y	Pain intensity (PMID:38429522), Osteoarthritis (hip) (GCST90034522)	N
128	q33.1	rs588818	9	127821554	A	G	0.0114268	0.00143716	0.7326	1.856e-15	+++	2.40995e-09	3.6e-06	0.0017262	Y	0.1584	120327400	131159086	SCAI	0	intronic	protein_coding	8.477	7	L211	Y	Pain intensity (PMID:38429522), Osteoarthritis (hip) (GCST90034522)	N
128	q33.1	rs7849174	9	128483627	T	C	-0.00849245	0.00132715	0.3576	1.563e-10	---	2.05989e-10	0.042	0.0102537	Y	0.006138	120327400	131159086	MAPKAP1	14113	intergenic		3.305	7	L211	N	Pain intensity (PMID:38429522), Osteoarthritis (hip) (GCST90034522)	N
128	q33.1	rs3003575	9	130987638	A	G	-0.00832036	0.0012773	0.5447	7.338e-11	---	3.25312e-05	5.5e-06	0.00941998	N	0.3274	120327400	131159086	DNM1	0	intronic	protein_coding	2.814	2b	L212	Y	Smoking initiation (GCST90243968)	Y
129	q34.3	rs79140116	9	140243968	T	C	0.0182993	0.0020087	0.1919	8.247e-20	?++		1e-12	7.72414e-09	Y	0.2738	140072180	140428156	EXD3	0	exonic	protein_coding	0.227	5	L213	Y	Multisite chronic pain (GCST012332), Pain (FinnGen)	N
130	p15.1	rs10795105	10	3997672	T	C	0.00966487	0.0015925	0.5571	1.284e-09	?++		2.6e-07	0.000541901	N	0.1984	3990312	4233037	RP11-464C19.3	19666	intergenic	lincRNA	1.627	5	L214	Y	Smoking initiation (GCST90243968)	Y
131	p13	rs57276326	10	16642567	A	G	-0.0124526	0.00220751	0.8487	1.686e-08	?--		0.00067	5.1074e-06	N	0.4619	16551917	22501895	RSU1	0	intronic	protein_coding	2.535	6	L215	Y	Depressive symptom (GCST90101758)	Y
131	p13	rs12254400	10	18555510	A	C	0.0109958	0.00199997	0.1142	3.84e-08	+++	0.000807915	0.00054	0.00655602	N	0.8364	16551917	22501895	CACNB2	0	intronic	protein_coding	0.308	7	L216	N	Pain intensity (PMID:38429522)	N
131	p13	rs10741041	10	18661781	T	C	0.00925181	0.0012839	0.4326	5.773e-13	+++	5.54563e-13	0.062	0.00116515	Y	0.0008644	16551917	22501895	CACNB2	0	intronic	protein_coding	0.182	5	L216	Y	Pain intensity (PMID:38429522)	N
131	p13	rs2131316450	10	18898729	G	GT	-0.011443	0.00201852	0.8245	1.438e-08	-?-	4.27083e-07		0.00339531	N	0.1557	16551917	22501895	NSUN6	0	intronic	protein_coding	3.681		L217	N	Pain intensity (PMID:38429522)	N
131	p13	rs1339046	10	19270803	A	G	0.0093866	0.00162567	0.615	7.757e-09	?++		2.8e-05	6.89049e-05	N	0.8153	16551917	22501895	RP11-288D15.1	40920	intergenic	pseudogene	2.096	6	L217	Y	Pain intensity (PMID:38429522)	N
131	p13	rs10764280	10	21047772	T	C	0.0097032	0.00133414	0.6506	3.522e-13	+++	1.55705e-07	1.1e-05	0.00336411	N	0.2791	16551917	22501895	NEBL	21129	intergenic		1.327	6	L218	Y	Pain intensity (PMID:38429522), Multisite chronic pain (GCST008512; GCST012332)	N
131	p13	rs10828248	10	21824619	A	G	-0.0126348	0.00133956	0.6566	4.033e-21	---	4.69836e-11	2.5e-07	5.10634e-06	Y	0.4189	16551917	22501895	MLLT10	0	intronic	protein_coding	3.906	4	L219	Y	Pain intensity (PMID:38429522), Multisite chronic pain (GCST008512; GCST012332)	N
132	q22.2	rs6480771	10	76861680	T	C	-0.00699785	0.00128377	0.567	4.995e-08	---	2.10017e-10	0.45	0.0301113	Y	0.0003481	76664836	77660765	DUSP13	00:00:00	exonic	protein_coding	8.103	5	L220	Y	Pain intensity (PMID:38429522), Osteoarthritis of the hip or knee (with total joint replacement) (GCST90034526)	N
132	q22.2	rs4746339	10	77656509	A	T	-0.00811261	0.00147717	0.2459	3.964e-08	---	0.000186043	0.00079	0.0159199	N	0.6452	76664836	77660765	C10orf11	0	intronic	protein_coding	3.931	6	L221	Y	Pain intensity (PMID:38429522), Osteoarthritis of the hip or knee (with total joint replacement) (GCST90034526)	N
133	q23.1	rs28800841	10	86019343	T	C	0.0124809	0.00214338	0.0976	5.79e-09	+++	0.0197572	0.0001	9.09913e-05	N	0.3714	85928618	86417162	RGR	0	UTR3	protein_coding	1.563	7	L222	Y	Smoking initiation (GCST90243968)	Y
134	q24.32	rs3824754	10	104614350	T	C	-0.0131087	0.00221058	0.0911	3.032e-09	---	0.000257841	0.0075	8.97202e-05	N	0.7113	103623986	107991779	C10orf32	0	intronic	protein_coding	11.72		L223	N	Pain intensity (PMID:38429522), Multisite chronic pain (GCST008512; GCST012332)	N
134	q24.32	rs57602965	10	105020445	CACAA	C	-0.00933242	0.00157456	0.4268	3.08e-09	--?	1.17321e-08	0.0096	0.440997	Y	0.04274	103623986	107991779	RPEL1	12671		protein_coding	0.543		L223	N	Pain intensity (PMID:38429522), Multisite chronic pain (GCST008512; GCST012332)	N
134	q24.32	rs10884031	10	106441985	A	T	0.00757727	0.00133145	0.3525	1.261e-08	+++	1.46969e-05	0.022	0.00149259	N	0.4234	103623986	107991779	SORCS3	0	intronic	protein_coding	6.939	6	L223	N	Pain intensity (PMID:38429522), Multisite chronic pain (GCST008512; GCST012332)	N
134	q24.32	rs11596250	10	106544393	C	G	0.00994393	0.00155495	0.7875	1.61e-10	+++	7.18588e-09	0.00087	0.0589088	Y	0.02669	103623986	107991779	SORCS3	0	intronic	protein_coding	2.796	5	L223	N	Pain intensity (PMID:38429522), Multisite chronic pain (GCST008512; GCST012332)	N
134	q24.32	rs12250380	10	106587950	A	G	0.0104993	0.00130735	0.3848	9.636e-16	+++	3.43153e-12	2.5e-06	0.029282	Y	0.004429	103623986	107991779	SORCS3	0	intronic	protein_coding	0.246	5	L223	Y	Pain intensity (PMID:38429522), Multisite chronic pain (GCST008512; GCST012332)	N
134	q24.32	rs4918211	10	107943225	T	G	0.00822355	0.00146744	0.2508	2.095e-08	+++	0.00497875	0.00064	0.000456846	N	0.8094	103623986	107991779	RP11-298H24.1	0	ncRNA_intronic	lincRNA	7.677	6	L223	N	Opioid use disorder (GCST90244135)	Y
135	q26.13	rs10901842	10	126635262	A	G	0.0085335	0.00145548	0.2571	4.536e-09	+++	0.000844548	0.00044	0.00092871	N	0.9607	126581095	126738471	ZRANB1	0	intronic	protein_coding	0.491	1f	L224	Y	Smoking initiation (GCST90243968)	Y
136	q26.3	rs12773533	10	134957797	A	T	-0.01116	0.00183733	0.7652	1.248e-09	--?	0.000173977	1.1e-06		N	0.3309	134915611	135038088	RPL5P28	318	downstream	pseudogene	2.741	2b	L225	Y	PHF-tau measurement (GCST010340)	Y
137	p15.2	rs10766073	11	13317964	A	G	-0.0100215	0.00141887	0.2786	1.635e-12	---	5.28579e-08	0.011	3.1017e-05	N	0.1695	13230507	17422619	ARNTL	0	intronic	protein_coding	5.2	3a	L226	Y	Pain intensity (PMID:38429522), Osteoarthritis of the hand (GCST90034527)	N
137	p15.2	rs12418276	11	16335121	T	C	0.0114042	0.00175856	0.1548	8.848e-11	+++	0.0227296	4.2e-10	0.00465897	Y	0.006242	13230507	17422619	SOX6	0	intronic	protein_coding	2.391	7	L227	Y	Pain intensity (PMID:38429522)	N
137	p15.2	rs757081	11	17351683	C	G	0.00803911	0.0013493	0.6666	2.552e-09	+++	1.70339e-07	0.0024	0.0463756	N	0.08096	13230507	17422619	NUCB2	0	exonic	protein_coding	21.1	7	L228	Y	Pain intensity (PMID:38429522)	N
138	p14.3	rs11028033	11	24595442	T	C	0.00753513	0.00133389	0.6503	1.609e-08	+++	0.00536079	0.0065	1.86234e-05	N	0.4565	24549096	24629356	LUZP2	0	intronic	protein_coding	6.096	6	L229	Y	Smoking initiation (GCST90243968)	Y
139	q12.1	rs61904011	11	57809764	A	G	0.00806008	0.00142783	0.273	1.651e-08	+++	0.00026424	0.0027	0.0018517	N	0.936	57404779	58417882	OR9Q1	0	intronic	protein_coding	11.28	7	L230	Y	Smoking cessation (GCST90243968)	Y
140	q12.3	rs584845	11	62496519	T	C	0.00936847	0.00154188	0.7825	1.236e-09	+++	9.97005e-07	0.00065	0.0293096	N	0.1828	62309787	62697813	TTC9C	0	exonic	protein_coding	22.5		L231	Y	Migraine (GCST90102553)	N
141	q13.5	rs7123238	11	76448811	A	G	-0.00932037	0.00157652	0.2047	3.382e-09	---	0.00135418	1.2e-06	0.0256555	N	0.1442	76413954	76511286	RP11-672A2.1	18158	intergenic	lincRNA	2.233	5	L232	Y	Knee osteoarthritis (GCST90271770)	N
142	q23.2	rs10789930	11	112842749	T	G	-0.0137757	0.00200636	0.8075	6.618e-12	?--		0.0001	6.9645e-09	Y	0.214	112602785	121832956	NCAM1	0	intronic	protein_coding	5.177	5	L233	Y	Pain (FinnGen)	N
142	q23.2	rs7122246	11	113304457	A	G	-0.00883778	0.00128643	0.5742	6.413e-12	---	2.29502e-06	0.017	2.34105e-06	N	0.2101	112602785	121832956	DRD2	0	intronic	protein_coding	2.338	5	L234	Y	Pain intensity (PMID:38429522), Back pain (GCST90245850), Pain (pleiotropy) (GCST90104572)	N
142	q23.2	rs7125588	11	113436072	A	G	0.00892536	0.00130794	0.6161	8.853e-12	+++	5.66024e-07	2.7e-05	0.00936311	N	0.2432	112602785	121832956	DRD2	89658	intergenic		1.64	7	L235	Y	Pain intensity (PMID:38429522), Back pain (GCST90245850), Pain (pleiotropy) (GCST90104572)	N
142	q23.2	rs3793957	11	115095654	T	C	0.00722195	0.00127281	0.4844	1.396e-08	+++	2.57544e-06	0.00077	0.084672	N	0.1223	112602785	121832956	CADM1	0	intronic	protein_coding	9.981		L236	Y	Smoking initiation (GCST90243968)	Y
142	q23.2	rs236911	11	117085270	A	C	0.0129752	0.00180864	0.8554	7.302e-13	+++	1.5639e-06	0.00086	2.14274e-05	N	0.6799	112602785	121832956	PCSK7	0	intronic	protein_coding	1.923	7	L237	Y	Smoking initiation (GCST90243968)	Y
142	q23.2	rs4938724	11	119672156	A	G	0.00705194	0.00127845	0.4506	3.459e-08	+++	0.0189227	0.031	4.44519e-07	N	0.0735	112602785	121832956	RP11-215D10.1	19856	intergenic	pseudogene	12.87	5	L238	Y	Rheumatoid arthritis (GCST90131437)	N
142	q23.2	rs1622638	11	121800971	A	G	0.00768808	0.00130064	0.396	3.39e-09	+++	5.13801e-06	0.0011	0.0173017	N	0.3403	112602785	121832956	RNU6-256P	74091	intergenic	snRNA	22.3	4	L239	Y	Opioid use disorder (GCST90296425)	Y
143	q25	rs6590700	11	133315491	T	C	0.00853057	0.00150424	0.7668	1.418e-08	+++	0.00114513	0.0021	0.000478278	N	0.9642	133275575	134345274	OPCML	0	intronic	protein_coding	1.082	7	L240	Y	Migraine (GCST003720)	N
143	q25	rs74622686	11	134264227	A	G	-0.0103641	0.0018597	0.8647	2.5e-08	---	5.10734e-06	0.0021	0.0482525	N	0.2126	133275575	134345274	B3GAT1	0	intronic	protein_coding	1.321	5	L241	Y	Migraine (GCST003720)	N
144	p13.31	rs7965269	12	7053022	T	C	0.00775864	0.00140428	0.2883	3.287e-08	+++	0.000240096	0.017	0.000509542	N	0.6926	6953257	7151943	C12orf57	0	ncRNA_exonic	protein_coding	0.505	1b	L242	Y	Smoking initiation (GCST90243968)	Y
145	p12.3	rs12309210	12	15388361	T	C	-0.0105225	0.00136726	0.6832	1.405e-14	---	5.37524e-05	2.9e-06	3.54724e-06	N	0.7942	15308804	15568509	RERG	0	intronic	protein_coding	0.676	6	L243	Y	General pain factor (GCST90129461)	N
146	p12.3	rs17501788	12	19141776	C	G	0.0122448	0.00208458	0.1677	4.245e-09	++?	3.55462e-08	0.0066		Y	0.07146	18838805	19700204	RPL7P6	100197	intergenic	pseudogene	0.962	7	L244	Y	Pain intensity (PMID:38429522)	N
146	p12.3	rs74894866	12	19179195	T	C	-0.0127683	0.00228946	0.0843	2.453e-08	---	0.000525146	0.0082	0.000421813	N	0.8401	18838805	19700204	RPL7P6	62778	intergenic	pseudogene	0.002	5	L244	N	Pain intensity (PMID:38429522)	N
146	p12.3	rs4763522	12	19324343	A	G	-0.00999857	0.00144217	0.2645	4.13e-12	---	7.76475e-08	0.00021	0.00395303	N	0.2409	18838805	19700204	PLEKHA5	0	intronic	protein_coding	3.307	7	L245	Y	Pain intensity (PMID:38429522)	N
147	p12.1	rs9804988	12	23982559	T	C	0.0150995	0.00192866	0.1242	4.917e-15	+++	9.51295e-07	4.8e-07	0.000281093	N	0.531	23784488	24291541	SOX5	0	intronic	protein_coding	0.412	7	L246	Y	Back pain (GCST007152)	N
147	p12.1	rs7314161	12	24107433	A	G	0.00820862	0.00141455	0.2814	6.506e-09	+++	0.000801325	0.019	1.51095e-05	N	0.4094	23784488	24291541	SOX5	3466	intergenic		13.43	3a	L246	N	Back pain (GCST007152)	N
147	p12.1	rs10842266	12	24203778	A	C	-0.00963858	0.00166068	0.348	6.489e-09	?--		0.00084	1.25435e-06	N	0.3271	23784488	24291541	SOX5	99811	intergenic		0.888	6	L247	Y	Back pain (GCST007152)	N
148	q12	rs11183219	12	46231953	T	C	-0.00774743	0.00142076	0.2774	4.941e-08	---	3.25669e-05	0.014	0.00534134	N	0.5168	46076419	50160662	ARID2	0	intronic	protein_coding	5.637	6	L248	N	Rheumatoid arthritis (GCST90132222)	N
148	q12	rs10880966	12	46801782	C	G	-0.00762122	0.00131016	0.3805	6.004e-09	---	0.0131118	1.2e-05	0.00105363	N	0.3304	46076419	50160662	RP11-96H19.1	0	ncRNA_intronic	lincRNA	3.997	7	L248	Y	Rheumatoid arthritis (GCST90132222)	N
148	q12	rs60064985	12	49903593	CA	C	-0.0187205	0.00286904	0.0801	6.798e-11	--?	2.40185e-06	6.5e-06		N	0.9618	46076419	50160662	SPATS2	0	intronic	protein_coding	1.061		L249	Y	Smoking initiation (GCST007468)	Y
149	q13.2	rs1081975	12	56393337	C	G	0.00864308	0.00129756	0.5984	2.714e-11	+++	8.17274e-05	3.6e-07	0.0108843	N	0.1715	56354272	58469303	SUOX	0	UTR5	protein_coding	2.861	5	L250	Y	Pain intensity (PMID:38429522), Migraine (GCST90102553, GCST011062, GCST001105)	N
149	q13.2	rs2140455406	12	58204430	T	TA	0.0103539	0.00163182	0.6691	2.23e-10	+?+	1.45729e-06		3.37381e-05	N	0.7044	56354272	58469303	AVIL	0	intronic	protein_coding	2.171		L251	Y	Hip osteoarthritis (GCST007091)	N
150	q21.1	rs7977748	12	75304137	T	C	0.0101408	0.00173942	0.7078	5.552e-09	?++		0.00016	8.18804e-06	N	0.6906	75194418	75564510	RP11-81K13.1	110611	intergenic	antisense	0.338	6	L252	Y	Smoking initiation (GCST90243968)	Y
151	q21.31	rs12425866	12	81748545	T	C	-0.00822201	0.00146377	0.7473	1.94e-08	---	0.00023131	0.0013	0.00480164	N	0.8609	81430043	84771127	PPFIA2	0	intronic	protein_coding	2.433	7	L253	Y	Alcohol consumption (GCST010543)	Y
151	q21.31	rs401687	12	83924986	C	G	-0.0080737	0.00127225	0.4952	2.217e-10	---	3.23767e-06	2.3e-05	0.0364485	N	0.1569	81430043	84771127	RP11-384P14.1	129801	intergenic	lincRNA	0.219	5	L254	Y	Smoking initiation (GCST90243968)	Y
152	q21.33	rs60689454	12	90415434	CT	C	-0.0102376	0.0018543	0.7713	3.378e-08	--?	3.41608e-06	0.0018		N	0.3613	89870544	90552234	RP11-654D12.2	32367	intergenic	lincRNA	3.681		L255	Y	Migraine (GCST90102553)	N
153	q23.1	rs76904423	12	101188744	A	G	0.0273068	0.00463535	0.0192	3.829e-09	+++	0.0542442	1.2e-05	6.9472e-05	N	0.1364	101128866	101588099	ANO4	0	UTR5	protein_coding	6.253	4	L256	Y	Alcohol dependence (GCST002477)	Y
154	q23.3	rs7295213	12	107685309	A	G	-0.00861871	0.00128926	0.4189	2.312e-11	---	2.28736e-05	0.00017	0.000353021	N	0.9282	107548112	108629780	SETP7	19685	intergenic	pseudogene	1.84	7	L257	Y	Pain pleiotropy (GCST90104572)	N
154	q23.3	rs3764002	12	108618630	T	C	-0.0104171	0.00140733	0.2862	1.343e-13	---	1.05983e-05	9.7e-05	6.5884e-06	N	0.9432	107548112	108629780	WSCD2	0	exonic	protein_coding	28.1	7	L258	Y	Pain intensity (PMID:38429522), Knee osteoarthritis (GCST90034523)	N
155	q24.31	rs10847803	12	122676531	A	G	0.00956869	0.00159054	0.8001	1.786e-09	+++	8.43978e-05	0.013	7.335e-05	N	0.5613	122459861	124330148	LRRC43	0	intronic	protein_coding	5.494	5	L259	Y	Pain intensity (PMID:38429522)	N
155	q24.31	rs118097728	12	123425261	T	C	0.0262374	0.00442601	0.0211	3.059e-09	+++	2.14727e-05	0.0019	0.0039443	N	0.6502	122459861	124330148	ABCB9	0	intronic	protein_coding	0.26	6	L259	N	Pain intensity (PMID:38429522), Migraine (GCST90102553), Knee osteoarthritis (GCST006925, GCST007090, GCST90034523), Hip osteoarthritis (GCST002155, GCST007091), Osteoarthritis ( GCST007093)	N
155	q24.31	rs67624109	12	123824635	T	C	-0.012913	0.00157764	0.2043	2.723e-16	---	2.98843e-15	0.002	0.00224616	Y	0.0008393	122459861	124330148	SBNO1	0	intronic	protein_coding	1.449	6	L260	Y	Pain intensity (PMID:38429522), Migraine (GCST90102553), Knee osteoarthritis (GCST006925, GCST007090, GCST90034523), Hip osteoarthritis (GCST002155, GCST007091), Osteoarthritis ( GCST007093)	N
156	q13.2	rs67277443	13	34622370	CAGG	C	-0.00745301	0.00130617	0.3867	1.158e-08	---	0.00610396	0.0046	1.61039e-05	N	0.4503	34499488	34685032	VDAC1P12	34195	intergenic	pseudogene	2.34		L261	Y	Multisite chronic pain (GCST012332)	N
157	q14.3	rs2408858	13	53919555	A	T	-0.0123503	0.00159133	0.4461	8.438e-15	?--		3.2e-09	4.01319e-07	Y	0.4726	53605235	60832322	AL450423.1	22424	intergenic	miRNA	1.653	6	L262	Y	Multisite chronic pain (GCST012332)	N
157	q14.3	rs1512643	13	56792776	A	C	-0.00843343	0.00135216	0.6694	4.468e-10	---	1.33685e-09	0.012	0.0336713	Y	0.01301	53605235	60832322	SPATA2P1	1699	intergenic	pseudogene	3.38	6	L263	Y	Pain intensity (PMID:38429522), Externalizing behaviour (ADHD, substance abuse, antisocial behavior) (GCST90061435)	N
157	q14.3	rs1333524	13	59315196	A	G	0.0100506	0.00176295	0.2794	1.193e-08	?++		0.049	1.59974e-09	Y	0.005265	53605235	60832322	DNAJA1P1	9984	intergenic	pseudogene	0.915	7	L264	Y	Pain (FinnGen)	N
157	q14.3	rs12866976	13	60332473	T	C	-0.0112061	0.00150762	0.2317	1.063e-13	---	1.29545e-07	0.0002	0.000126826	N	0.5637	53605235	60832322	DIAPH3	0	intronic	protein_coding	0.364	6	L265	Y	Pain (FinnGen)	N
158	q21.31	rs55855888	13	65070364	A	G	0.00770396	0.00141047	0.2841	4.701e-08	+++	0.000104231	0.0058	0.00525945	N	0.7328	64623557	67019957	LINC00355	420219	intergenic	lincRNA	5.084	7	L266	Y	Smoking initiation (GCST90243968)	Y
158	q21.31	rs1460655	13	66491156	A	G	-0.0103667	0.00174084	0.8413	2.599e-09	---	2.51057e-06	0.00046	0.0383893	N	0.1965	64623557	67019957	LINC01052	38804	intergenic	lincRNA	1.664		L267	Y	Smoking initiation (GCST90243968)	Y
158	q21.31	rs7988498	13	66946477	T	C	-0.00899922	0.00158242	0.4897	1.294e-08	?--		1.1e-06	0.00139685	N	0.2038	64623557	67019957	PCDH9	0	intronic	protein_coding	4.161	5	L268	Y	Smoking initiation (GCST90243968)	Y
159	q22.1	rs78116502	13	74699821	A	G	-0.0110147	0.00181282	0.8562	1.23e-09	---	7.1236e-08	0.19	0.00020919	N	0.02266	74675573	74733764	KLF12	0	intronic	protein_coding	0.131	5	L269	Y	Pain intensity (PMID:38429522)	N
160	q12	rs28826952	14	29495203	T	C	0.0113654	0.00199779	0.8131	1.278e-08	++?	0.000344253	6.9e-06		N	0.4132	29273706	29849733	RP11-148E17.1	0	ncRNA_intronic	lincRNA	0.218	7	L270	Y	Pain pleiotropy (GCST90104572)	N
160	q12	rs17641673	14	29694034	A	G	-0.0148367	0.00269024	0.9044	3.496e-08	?--		8.9e-05	0.000103841	N	0.9138	29273706	29849733	RP11-562L8.1	39996	intergenic	processed_transcript	19.48	6	L270	N	Pain pleiotropy (GCST90104572)	N
161	q13.2	rs12432118	14	36445509	T	C	0.0207633	0.00376557	0.9706	3.5e-08	+++	0.000198035	0.013	0.000926574	N	0.7485	35895951	38218718	RP11-116N8.1	0	ncRNA_intronic	sense_overlapping	2.516	6	L271	Y	Pain intensity (PMID:38429522)	N
161	q13.2	rs34034928	14	37731252	G	GA	-0.0082826	0.0013802	0.3061	1.958e-09	---	2.04853e-05	5.6e-05	0.0356107	N	0.2494	35895951	38218718	MIPOL1	0	intronic	protein_coding	0.655		L272	Y	Pain intensity (PMID:38429522)	N
162	q21.1	rs1137567	14	42077288	A	G	0.00731056	0.00127251	0.4889	9.177e-09	+++	0.00032244	4.8e-05	0.0211252	N	0.4129	41931698	42547516	LRFN5	0	UTR5	protein_coding	15.19	4	L273	Y	Migraine (GCST90102553)	N
163	q21.2	rs1491905	14	47296286	T	C	0.0108757	0.00127365	0.4759	1.35e-17	+++	1.98932e-10	0.00063	8.35718e-07	Y	0.1725	46777783	47453632	MDGA2	12539	intergenic		1.532		L274	Y	Pain intensity (PMID:38429522)	N
164	q22.2	rs56262555	14	55561962	T	C	-0.00715479	0.00127673	0.4579	2.092e-08	---	0.00437699	9.5e-05	0.00280595	N	0.6453	55239544	55916225	MAPK1IP1L	25051	intergenic		0.764	5	L275	Y	Smoking initiation (GCST90243968)	Y
165	q24.1	rs61985013	14	69241236	A	C	-0.00827659	0.00141046	0.7159	4.419e-09	---	7.11216e-06	0.0073	0.00329329	N	0.4565	69138011	69791308	ZFP36L1	13140	intergenic		3.261	7	L276	Y	Pain intensity (PMID:38429522), Osteoporosis (GCST90018887)	N
165	q24.1	rs4902677	14	69403695	T	C	-0.00773234	0.00137415	0.311	1.833e-08	---	7.26341e-05	0.0067	0.00242231	N	0.7309	69138011	69791308	ACTN1	0	intronic	protein_coding	1.741	5	L276	N	Pain intensity (PMID:38429522), Osteoporosis (GCST90018887)	N
165	q24.1	rs10135971	14	69517494	A	G	0.0104817	0.00134848	0.3342	7.654e-15	+++	2.15333e-07	5.9e-05	2.33443e-05	N	0.7799	69138011	69791308	DCAF5	103	downstream	protein_coding	10.39	5	L277	Y	Pain intensity (PMID:38429522), Osteoporosis (GCST90018887)	N
165	q24.1	rs1890940	14	69748886	T	C	0.00811495	0.00127233	0.5075	1.788e-10	+++	6.18774e-06	0.00082	0.00163226	N	0.6497	69138011	69791308	GALNT16	0	intronic	protein_coding	0.624	2b	L277	N	Pain intensity (PMID:38429522), Osteoporosis (GCST90018887)	N
166	q24.3	rs34253239	14	75228486	CT	C	-0.00910976	0.00158513	0.531	9.109e-09	?--		2.9e-05	7.81628e-05	N	0.8035	75019157	75668384	YLPM1	1582	intergenic		0.041		L278	Y	Migraine (GCST90102553)	N
167	q32.2	rs7149242	14	101159416	T	G	0.00773318	0.0013792	0.3069	2.062e-08	+++	5.76966e-06	0.017	0.00636283	N	0.3217	101099721	104537680	RP11-566J3.2	13194	intergenic	lincRNA	5.635	1f	L279	Y	Pain intensity (PMID:38429522), Smoking initiation (GCST90243985)	N
167	q32.2	rs3803286	14	103246470	A	G	0.00994251	0.00134395	0.3388	1.387e-13	+++	6.47292e-08	4.6e-05	0.000979535	N	0.3745	101099721	104537680	TRAF3	0	intronic	protein_coding	11.87		L280	Y	Pain intensity (PMID:38429522), Multisite chronic pain (GCST012332)	N
167	q32.2	rs7401901	14	104250843	T	C	-0.00892602	0.00158459	0.5919	1.769e-08	--?	0.000821896	3.1e-06		N	0.2711	101099721	104537680	PPP1R13B	0	intronic	protein_coding	0.529	6	L281	Y	Pain intensity (PMID:38429522), Multisite chronic pain (GCST012332)	N
168	q14	rs35134214	15	38865321	CTG	C	-0.00880236	0.00159839	0.8027	3.641e-08	---	0.0130959	0.0032	3.66944e-05	N	0.4609	38817150	38999345	RASGRP1	7544	intergenic		1.271		L282	Y	Rheumatoid arthritis (GCST005568)	N
169	q21.1	rs1915159	15	46406722	A	G	-0.00782407	0.00127428	0.4714	8.262e-10	---	2.59811e-07	0.0022	0.0181526	N	0.1506	46298458	46618157	RP11-315O8.1	14131	intergenic	pseudogene	1.768		L283	Y	Pain intensity (PMID:38429522), Opioid use disorder (MTAG) (GCST90134625)	N
170	q23	rs11630322	15	69951728	A	G	-0.00755942	0.00132204	0.636	1.078e-08	---	1.70659e-05	0.01	0.00288928	N	0.5202	69936071	69958471	RP11-279F6.3	0	ncRNA_intronic	lincRNA	5.411	5	L284	Y	Osteoarthritis of the hip or knee (GCST007092), osteoarthritis hip (GCST90034522, GCST007091)	N
171	q24.1	rs80100436	15	73813745	T	C	-0.015493	0.00279254	0.9451	2.893e-08	---	1.76503e-06	0.015	0.0197765	N	0.1822	73564181	76134174	C15orf60	0	intronic	protein_coding	0.435	7	L285	N	Pain intensity (PMID:38429522), Multisite chronic pain (GCST012332)	N
171	q24.1	rs71137359	15	74165781	CTTT	C	-0.0141919	0.00209815	0.835	1.339e-11	--?	6.52769e-10	0.00094		Y	0.06749	73564181	76134174	RP11-24D15.1	73	upstream	antisense	0.595		L285	Y	Pain intensity (PMID:38429522), Multisite chronic pain (GCST012332)	N
171	q24.1	rs139642070	15	75348905	CAACA	C	-0.00908791	0.00156392	0.5449	6.229e-09	--?	0.0046618	4.5e-08		Y	0.04126	73564181	76134174	PPCDC	0	intergenic		3.923		L286	N	Pain intensity (PMID:38429522), Multisite chronic pain (GCST012332)	N
171	q24.1	rs76621678	15	75844953	T	C	0.010038	0.00169818	0.1688	3.408e-09	+++	5.48358e-05	0.00015	0.0160535	N	0.4708	73564181	76134174	PTPN9	0	ncRNA_intronic	protein_coding	0.074	4	L286	Y	Pain intensity (PMID:38429522), Multisite chronic pain (GCST012332)	N
172	q25.3	rs4369625	15	86931797	A	G	-0.00864142	0.00135637	0.3266	1.883e-10	---	0.000689655	0.056	1.27283e-08	Y	0.03085	86790134	87109504	AGBL1	0	intronic	protein_coding	3.938	7	L287	Y	Pain (FinnGen)	N
173	q26.1	rs6496748	15	91546936	A	G	-0.0104064	0.00129739	0.5981	1.047e-15	---	6.29543e-05	4.1e-11	0.000746225	Y	0.03673	91444476	91581269	VPS33B	0	intronic	protein_coding	3.604	7	L288	Y	Pain intensity (PMID:38429522), Multisite chronic pain (GCST012332)	N
174	q26.2	rs16975040	15	95888064	T	C	0.0070888	0.00128072	0.5576	3.111e-08	+++	6.30819e-05	0.11	8.87197e-05	N	0.1932	95870977	97247499	CTD-2536I1.1	17705	intergenic	lincRNA	5.215	7	L289	Y	Smoking initiation (GCST90243968)	Y
174	q26.2	rs12438687	15	96955776	T	C	0.0105865	0.00189892	0.1288	2.469e-08	+++	0.0167186	2.5e-05	0.00189439	N	0.3581	95870977	97247499	RP11-522B15.4	7356	intergenic	lincRNA	0.808	4	L290	Y	Smoking initiation (GCST90243968)	Y
175	p13.3	rs3752490	16	717828	T	G	-0.00755671	0.00130019	0.3968	6.177e-09	---	0.00244377	1.4e-05	0.00625389	N	0.4171	609130	792190	WDR90	0	UTR3	protein_coding	2.088		L291	Y	Smoking cessation (GCST90243968)	Y
176	p13.2	rs6497316	16	9716408	A	C	0.00832046	0.0013667	0.6827	1.143e-09	+++	6.11603e-05	0.0012	0.00104653	N	0.8887	9683896	9778237	RNA5SP404	22322	intergenic	rRNA	2.677	7	L292	Y	Smoking initiation (GCST90243968)	Y
177	p12.1	rs62032342	16	25338151	A	G	-0.0142409	0.00178435	0.8506	1.45e-15	---	3.47326e-08	0.00054	1.66104e-06	Y	0.4383	25227828	25527156	ZKSCAN2	68898	intergenic		2.919	7	L293	Y	Pain intensity (PMID:38429522)	N
178	p11.2	rs7201780	16	30147265	T	C	-0.00765094	0.00127728	0.4554	2.104e-09	---	1.48074e-06	0.017	0.00190735	N	0.2683	29494017	31378235	MAPK3	12437	intergenic		1.747	6	L294	Y	Pain intensity (PMID:38429522)	N
178	p11.2	rs8044030	16	30927990	A	G	-0.00983381	0.0016016	0.3836	8.233e-10	--?	4.98758e-09	0.006		Y	0.04442	29494017	31378235	FBXL19-AS1	2649	intergenic	antisense	0.104	5	L295	Y	Pain intensity (PMID:38429522)	N
179	q12.1	rs7187662	16	49614038	T	C	-0.010713	0.00155871	0.7889	6.269e-12	---	3.2855e-06	0.015	1.95088e-06	N	0.2279	49536854	49653496	ZNF423	0	intronic	protein_coding	5.659	5	L296	Y	Pain intensity (PMID:38429522)	N
180	q21	rs1369788	16	60591948	A	T	0.008384	0.00129783	0.4011	1.047e-10	+++	0.000875859	1e-05	0.000501811	N	0.6181	60544428	60745208	RP11-354I13.1	34793	intergenic	lincRNA	5.114	6	L297	Y	Smoking cessation (GCST90243968)	Y
181	q21	rs10557877	16	65987543	A	ACT	-0.00918542	0.00162459	0.3579	1.568e-08	--?	2.68884e-06	0.0011		N	0.3992	65919908	72260693	RP11-356O24.1	15186	intergenic	pseudogene	3.633		L298	Y	Insomnia (GCST90131901)	Y
181	q21	rs3759982	16	69140747	T	C	-0.0132145	0.00240264	0.8763	3.806e-08	?--		7.6e-05	0.000131404	N	0.8606	65919908	72260693	HAS3	0	intronic	protein_coding	12.6	4	L299	Y	Chronic musculoskeletal pain (GCST90245880)	N
181	q21	rs62053265	16	69977302	A	C	0.0077405	0.00127858	0.4501	1.414e-09	+++	5.97334e-05	0.044	1.07372e-05	N	0.2353	65919908	72260693	WWP2	1657	intergenic		2.521	2b	L300	Y	Chronic musculoskeletal pain (GCST90245880)	N
181	q21	rs60783588	16	71974745	CT	C	0.0104239	0.00177639	0.2596	4.404e-09	++?	0.00036526	1.8e-06		N	0.3025	65919908	72260693	PKD1L3	0	ncRNA_intronic	processed_transcript	0.509		L301	Y	Neck pain (GCST010080)	N
182	q23.1	rs1683399	16	77106058	A	G	-0.00908465	0.00128314	0.4348	1.441e-12	---	1.35078e-05	3.2e-07	0.0047203	N	0.2323	76989401	77367782	MON1B	118673	intergenic		0.101	6	L302	Y	Multisite chronic pain (GCST012332)	N
182	q23.1	rs2232498	16	77224889	T	G	-0.00999232	0.00183211	0.1402	4.927e-08	---	2.02735e-05	0.00042	0.101517	N	0.1703	76989401	77367782	MON1B	0	UTR5	protein_coding	10.8	4	L302	N	Multisite chronic pain (GCST012332)	N
183	q24.3	rs7190662	16	88726280	A	C	-0.00978377	0.00173996	0.1589	1.88e-08	---	0.000590356	1.5e-05	0.0451835	N	0.2299	88706330	90153167	MVD	0	intronic	protein_coding	0.168	6	L303	N	Pain intensity (PMID:38429522), Osteoarthritis (GCST007093)	N
183	q24.3	rs12927793	16	89238190	A	G	0.00898021	0.0015928	0.5579	1.717e-08	?++		2.6e-07	0.00425893	N	0.08827	88706330	90153167	CDH15	0	UTR5	protein_coding	8.468	4	L303	N	Pain intensity (PMID:38429522), Osteoarthritis (GCST007093)	N
183	q24.3	rs164749	16	89708224	T	G	-0.00886093	0.00128271	0.5639	4.928e-12	---	1.76975e-08	5.1e-05	0.0253676	Y	0.06634	88706330	90153167	CHMP1A	2614	intergenic		1.21		L303	Y	Pain intensity (PMID:38429522), Osteoarthritis (GCST007093)	N
183	q24.3	rs3212349	16	89983537	T	C	-0.00832781	0.00127923	0.4476	7.512e-11	---	2.41114e-06	0.00045	0.00254132	N	0.5278	88706330	90153167	MC1R	0	ncRNA_intronic	protein_coding	0.392	7	L303	N	Pain intensity (PMID:38429522), Osteoarthritis (GCST007093)	N
184	p13.2	rs79940062	17	4797910	A	G	0.0242192	0.00442602	0.0211	4.45e-08	+++	8.6258e-08	0.11	0.0156646	N	0.02855	3874536	5677345	MINK1	0	exonic	protein_coding	26.9	5	L304	Y	Pain intensity (PMID:38429522), Migraine (GCST003720)	N
185	p11.2	rs203462	17	19812541	T	C	-0.00760599	0.00131274	0.6233	6.871e-09	---	3.48769e-08	0.29	0.000859983	Y	0.01072	19713038	20440621	AKAP10	0	exonic	protein_coding	17.48	6	L305	Y	Pain intensity (PMID:38429522)	N
186	q11.2	rs28494843	17	29010238	A	T	-0.00768588	0.00136832	0.3159	1.941e-08	---	3.99596e-05	0.00019	0.0600344	N	0.2485	28661392	29255323	AC005562.1	10430	intergenic	processed_transcript	0.053	6	L306	Y	Pain pleiotropy (GCST90104572)	N
187	q21.31	rs12936234	17	43177951	T	C	0.00978175	0.00163574	0.3473	2.234e-09	++?	0.000372469	7.7e-07		N	0.2473	43081974	43334978	NMT1	0	intronic	protein_coding	2.317	6	L307	Y	Smoking initiation (GCST90243968)	Y
188	q21.33	rs12453010	17	50316131	T	C	0.0104694	0.00130591	0.3871	1.083e-15	+++	3.70132e-07	9.7e-12	0.0407953	Y	0.002308	50188905	50342947	snoZ178	12423	intergenic	snoRNA	3.63	5	L308	Y	Multisite chronic pain (GCST012332)	N
189	q23.2	rs117140195	17	61348981	T	C	-0.00867147	0.00158905	0.2004	4.847e-08	---	0.00163056	0.081	6.24612e-06	N	0.165	60907107	61543178	TANC2	0	ncRNA_intronic	protein_coding	3.464	6	L309	Y	Hip osteoarthritis (GCST007091)	N
190	q24.2	rs113985803	17	65989971	A	G	-0.0144942	0.00149734	0.7637	3.654e-22	---	1.0113e-07	2.4e-07	3.44223e-10	Y	0.6943	65762341	66204635	RP11-855A2.5	24	upstream	lincRNA	9.38	4	L310	Y	Pain intensity (PMID:38429522), Pain (FinnGen)	N
191	q25.1	rs62086015	17	74808719	T	C	0.016899	0.00280156	0.0844	1.618e-09	++?	4.90891e-06	7.9e-05		N	0.7949	74603634	74853404	CTD-2246P4.1	6683	intergenic	lincRNA	0.641	5	L311	Y	Smoking initiation (GCST90243968)	Y
192	q11.2	rs1788823	18	21114917	A	G	0.00879991	0.00134043	0.3425	5.198e-11	+++	0.00435499	5.5e-05	6.02254e-06	N	0.4113	20879432	21200467	NPC1	0	intronic	protein_coding	0.118		L312	Y	Total cholesterol levels (GCST90018974), Monocyte count (GCST90018967)	Y
193	q12.1	rs726145	18	31187910	A	C	-0.00933327	0.00164841	0.3596	1.493e-08	?--		0.0004	8.38745e-06	N	0.5734	30353181	31639037	ASXL3	0	intronic	protein_coding	4.662	7	L313	N	Smoking initiation (GCST90243968)	Y
193	q12.1	rs17747003	18	31332460	T	G	0.0110791	0.00181209	0.2562	9.707e-10	?++		1.1e-06	0.000150117	N	0.392	30353181	31639037	ASXL3	1303	intergenic		0.438	7	L313	Y	Smoking initiation (GCST90243968)	Y
194	q12.2	rs12967741	18	35168263	A	G	0.00934132	0.00134679	0.3359	4.03e-12	+++	4.13856e-06	0.00023	0.000214057	N	0.8344	35086406	35408205	CELF4	22262	intergenic		5.498	6	L314	Y	Smoking initiation (GCST90243968)	Y
195	q12.3	rs17785503	18	39114609	T	C	-0.00966201	0.00173247	0.8394	2.445e-08	---	0.0155403	5.2e-05	0.00117355	N	0.4372	38774061	39381834	RP11-142I20.1	0	ncRNA_intronic	lincRNA	9.527	7	L315	N	Pain (FinnGen)	N
195	q12.3	rs6507431	18	39296323	T	C	0.0117529	0.00159232	0.8007	1.571e-13	+++	0.00194079	3.7e-05	2.21034e-08	Y	0.1786	38774061	39381834	RP11-188I24.1	72803	intergenic	pseudogene	0.849	5	L315	Y	Pain (FinnGen)	N
196	q12.3	rs72902653	18	42749081	A	G	-0.0103529	0.00148707	0.2411	3.359e-12	---	0.0129588	1.6e-05	1.05167e-07	N	0.1003	42627356	42885109	RP11-846C15.2	0	ncRNA_exonic	antisense	6.663	4	L316	Y	Smoking initiation (GCST90243968)	Y
197	q21.2	rs12961437	18	50106099	T	G	0.0119582	0.00175856	0.8452	1.044e-11	+++	2.25449e-05	6.4e-05	0.000401541	N	0.8951	49931122	53720256	DCC	0	intronic	protein_coding	4.019	7	L317	N	Pain intensity (PMID:38429522), Insomnia (GCST90131901)	N
197	q21.2	rs9959803	18	50622904	T	C	0.0145417	0.00264972	0.9386	4.074e-08	+++	0.0349999	0.08	1.70781e-08	Y	0.01006	49931122	53720256	DCC	0	intronic	protein_coding	8.548	6	L317	N	Pain intensity (PMID:38429522), Insomnia (GCST90131901)	N
197	q21.2	rs17411339	18	50807359	A	G	-0.0133485	0.00128648	0.5744	3.172e-25	---	9.90504e-06	6.8e-11	1.27526e-12	Y	0.09069	49931122	53720256	DCC	0	intronic	protein_coding	2.034	6	L317	Y	Pain intensity (PMID:38429522), Multisite chronic pain (GCST012332)	N
197	q21.2	rs1504741	18	50909228	C	G	-0.0110103	0.00175995	0.1545	3.957e-10	---	0.000634558	0.021	3.73792e-07	N	0.1581	49931122	53720256	DCC	0	intronic	protein_coding	1.882	5	L317	N	Pain intensity (PMID:38429522), Insomnia (GCST90131901)	N
197	q21.2	rs34220720	18	52795084	T	C	-0.00751745	0.00135669	0.6737	3.006e-08	---	6.0509e-09	0.012	0.24065	Y	0.004511	49931122	53720256	CTD-2171N6.1	3546	intergenic	lincRNA	0.533	6	L318	N	Pain intensity (PMID:38429522), Multisite chronic pain (GCST008512; GCST012332), Chronic back pain (GCST007152)	N
197	q21.2	rs118084819	18	52852466	A	C	-0.0248081	0.00284432	0.9472	2.724e-18	---	7.16711e-13	0.00032	2.33276e-05	Y	0.04364	49931122	53720256	TCF4	37095	intergenic		1.24	6	L318	Y	Pain intensity (PMID:38429522), Multisite chronic pain (GCST008512; GCST012332), Chronic back pain (GCST007152)	N
197	q21.2	rs375140529	18	52894479	CAA	C	0.0179671	0.00246563	0.1124	3.159e-13	++?	2.52701e-10	9.1e-05		Y	0.1364	49931122	53720256	TCF4	0	UTR3	protein_coding	8.735		L318	N	Pain intensity (PMID:38429522), Multisite chronic pain (GCST008512; GCST012332), Chronic back pain (GCST007152)	N
197	q21.2	rs613872	18	53210302	T	G	0.0129267	0.00171579	0.8355	4.907e-14	+++	9.22218e-11	1.3e-06	0.0920598	Y	0.003224	49931122	53720256	TCF4	0	intronic	protein_coding	1.664	5	L319	Y	Pain intensity (PMID:38429522), Multisite chronic pain (GCST008512; GCST012332), Chronic back pain (GCST007152)	N
198	q23	rs545933	18	77550222	T	C	0.00835379	0.00147515	0.7531	1.488e-08	+++	0.00275885	2.9e-05	0.00754362	N	0.4694	77396601	77725683	RP11-154H12.2	0	ncRNA_intronic	lincRNA	6.129	5	L320	N	Pain intensity (PMID:38429522), Opioid sensitivity (GCST002235)	N
198	q23	rs11665567	18	77563334	A	G	0.0128614	0.00156142	0.2101	1.771e-16	+++	2.90368e-10	0.00039	1.44049e-05	Y	0.193	77396601	77725683	RP11-154H12.3	0	ncRNA_intronic	lincRNA	0.143	5	L320	Y	Pain intensity (PMID:38429522), Opioid sensitivity (GCST002235)	N
199	p13.3	rs13169	19	808586	C	G	-0.0104029	0.00165283	0.8192	3.084e-10	---	0.000670986	7.2e-05	0.000382737	N	0.8523	779908	2771573	PTBP1	0	exonic	protein_coding	11.36	4	L321	Y	Rheumatoid arthritis (GCST90132222)	N
199	p13.3	rs12461580	19	2683829	C	G	0.0090411	0.00153656	0.7804	4.001e-09	+++	3.20428e-05	0.0038	0.00190831	N	0.7111	779908	2771573	GNG7	0	intronic	protein_coding	2.087	5	L322	Y	Rheumatoid arthritis (GCST90132222)	N
200	p13.2	rs57148308	19	10776280	A	AT	0.00892898	0.00161581	0.367	3.276e-08	++?	0.0019089	1.9e-06		N	0.1807	10649210	11180047	ILF3	0	intronic	protein_coding	6.129		L323	Y	Chronic musculoskeletal pain (GCST90245880)	N
201	p13.11	rs2023878	19	18834124	T	C	-0.0091946	0.0015563	0.212	3.458e-09	---	1.14252e-06	0.0043	0.0140738	N	0.2292	18597196	18911078	CRTC1	0	intronic	protein_coding	0.15	5	L324	Y	Migraine (GCST90102553)	N
202	q13.12	rs8101606	19	35774556	A	C	-0.00820744	0.00149498	0.7626	4.021e-08	---	1.67738e-05	0.03	0.00294029	N	0.3793	35697823	38474060	HAMP	0	intronic	protein_coding	5.468	7	L325	Y	Rheumatoid arthritis (GCST90132222)	N
202	q13.12	rs4586564	19	37746380	T	G	-0.0118094	0.00177318	0.1517	2.73e-11	---	0.00116531	0.00018	5.06629e-06	N	0.5991	35697823	38474060	AC012309.5	0	ncRNA_intronic	lincRNA	3.511	6	L326	Y	Pain intensity (PMID:38429522)	N
203	q13.32	rs12162222	19	45348522	T	G	-0.00898681	0.00140573	0.2873	1.626e-10	---	2.38887e-05	0.001	0.000411027	N	0.8656	45323170	45859884	PVRL2	909	upstream	protein_coding	1.666	4	L327	Y	Pain intensity (PMID:38429522), Osteoarthritis of the hand (GCST90034527)	N
203	q13.32	rs429358	19	45411941	T	C	0.0153218	0.00173992	0.8411	1.302e-18	+++	2.54211e-11	0.00015	2.49804e-06	Y	0.1735	45323170	45859884	APOE	0	exonic	protein_coding	12.64	5	L328	Y	Pain intensity (PMID:38429522), Osteoarthritis of the hand (GCST90034527)	N
203	q13.32	rs4884	19	45810035	A	G	-0.00774941	0.00142061	0.2775	4.887e-08	---	0.000394567	0.22	3.96269e-06	N	0.0613	45323170	45859884	CKM	0	exonic	protein_coding	21.8		L328	N	Pain intensity (PMID:38429522), Osteoarthritis of the hand (GCST90034527)	N
204	q13.33	rs10401643	19	49965475	T	C	0.009621	0.00162682	0.6443	3.334e-09	++?	4.57563e-06	0.00017		N	0.6844	49943778	49995536	ALDH16A1	0	intronic	protein_coding	0.178	7	L329	Y	Smoking initiation (GCST90243968)	Y
205	p13	rs56301259	20	1894606	T	C	0.00796701	0.00131817	0.3691	1.504e-09	+++	4.74255e-05	0.058	8.84138e-06	N	0.1864	1592215	1906028	SIRPA	0	intronic	protein_coding	0.212	5	L330	Y	Smoking initiation (GCST90243968)	Y
206	p12.1	rs80044408	20	16025289	T	G	-0.0136673	0.00235683	0.0791	6.676e-09	---	8.46499e-05	0.0003	0.0127403	N	0.5771	15828197	16043408	MACROD2	0	intronic	protein_coding	17.1	4	L331	Y	Smoking initiation (GCST90243968)	Y
207	p11.23	rs6112505	20	19648772	A	T	0.0151647	0.00223076	0.8525	1.062e-11	?++		2.9e-10	0.000795628	Y	0.02875	19575017	21631378	SLC24A3	0	intronic	protein_coding	0.245	5	L332	Y	Multisite chronic pain (GCST012332)	N
207	p11.23	rs11475262	20	21145353	CT	C	0.00931537	0.00165225	0.3332	1.716e-08	++?	7.07317e-06	0.00055		N	0.5719	19575017	21631378	PLK1S1	0	ncRNA_intronic	processed_transcript	1.165		L333	Y	Pain intensity (PMID:38429522)	N
208	q11.21	rs6119267	20	31163914	C	G	-0.00976177	0.0013323	0.6485	2.357e-13	---	2.54017e-05	1.4e-06	0.000236995	N	0.6553	30689924	31400673	C20orf112	0	intronic	protein_coding	0.498	5	L334	Y	Migraine (GCST003720)	N
209	q12	rs6065515	20	41211992	T	C	0.00724254	0.00127577	0.4626	1.369e-08	+++	0.0276326	0.0015	7.17067e-06	N	0.241	41199435	42076976	PTPRT	0	intronic	protein_coding	1.694	5	L335	N	Smoking initiation (GCST90243968)	Y
209	q12	rs4583528	20	41949755	A	G	0.00974507	0.00162418	0.6131	1.967e-09	?++		1.4e-06	0.000234234	N	0.3684	41199435	42076976	RP5-862K6.4	16435	intergenic	pseudogene	0.3	5	L335	Y	Smoking initiation (GCST90243968)	Y
210	q13.2	rs1964133	20	50788244	T	G	0.00697894	0.0012726	0.4874	4.163e-08	+++	0.0112748	0.026	2.21835e-06	N	0.1571	50715685	51299884	ZFP64	0	intronic	protein_coding	2.031	7	L336	Y	Back pain (GCST90245851)	N
211	q13.33	rs2738774	20	62269338	A	G	-0.00866446	0.00135446	0.3284	1.583e-10	---	2.95572e-08	0.02	0.00182747	Y	0.08457	62018289	62910548	STMN3	1722	intergenic		1.491	7	L337	N	Pain intensity (PMID:38429522)	N
211	q13.33	rs11473068	20	62406029	CTG	C	0.00939638	0.00157051	0.564	2.187e-09	++?	8.29916e-08	0.0024		N	0.1425	62018289	62910548	ZBTB46	0	intronic	protein_coding	1.735		L337	N	Pain intensity (PMID:38429522)	N
211	q13.33	rs66486049	20	62426150	C	G	-0.0193107	0.0025459	0.0669	3.331e-14	---	2.22424e-08	2.6e-05	0.000968055	Y	0.3108	62018289	62910548	ZBTB46	0	intronic	protein_coding	3.208	4	L337	Y	Pain intensity (PMID:38429522)	N
211	q13.33	rs3003138	20	62831503	A	G	-0.00953758	0.00153832	0.7811	5.644e-10	---	1.25529e-05	0.00077	0.00287614	N	0.6593	62018289	62910548	MYT1	0	intronic	protein_coding	4.533	5	L338	Y	Pain intensity (PMID:38429522)	N
212	q22.3	rs150770076	21	44048984	T	TGATA	-0.00995623	0.00156348	0.4061	1.921e-10	-?-	8.79378e-05		3.3607e-07	N	0.3525	43883205	46730056	AP001626.1	13815	intergenic	lincRNA	0.73		L339	Y	Rheumatoid arthritis (GCST90013534)	N
212	q22.3	rs3215899	21	46631972	A	AT	0.00744001	0.00128298	0.5647	6.675e-09	+++	1.23792e-05	0.0027	0.00841415	N	0.4917	43883205	46730056	ADARB1	0	intronic	protein_coding	0.216		L340	Y	Pain intensity (PMID:38429522)	N
213	q12.2	rs113034943	22	31193569	CTATT	C	0.0115243	0.00200877	0.1919	9.662e-09	?++		0.0006	3.10563e-06	N	0.4318	30955094	32512070	OSBP2	0	intronic	protein_coding	4.552		L341	N	Smoking initiation (GCST90243968)	Y
213	q12.2	rs111230813	22	31779048	A	G	-0.0244555	0.00376877	0.0447	8.664e-11	--?	1.24872e-05	1.4e-06		N	0.606	30955094	32512070	RNU6-338P	5670	intergenic	snRNA	0.914	6	L341	Y	Smoking initiation (GCST90243968)	Y
214	q13.2	rs11373181	22	42705672	A	AC	0.00897203	0.00155846	0.4834	8.573e-09	++?	0.00117393	7.4e-07		N	0.1683	42691689	42859142	TCF20	0	intronic	protein_coding	0.594		L342	Y	Pain intensity (PMID:38429522), Osteoarthritis (GCST007093)	N
215		rs12877	23	153630255	C	G	-0.0123455	0.00218351	0.8553	1.567e-08	-?-	2.90443e-07		0.00459727	N	0.1233	153297010	154562897	RPL10	0	UTR3	protein_coding	0.641	3a	L343	Y	Rheumatoid arthritis (GCST005568)	N

## Sheet: ST5
Supplementary Table 5. Associated lead SNPs for chronic pain from the secondary GWAS meta-analyses (N = 851,332). GRCh37_bp: base position. P-values are considered GWS after correction for multiple testing at p<5x10-8.
GenomicLocus	Genomic_cord	rsID	CHR	GRCh37_bp	Effect allele	Other allele	BETA	SE	Freq1	P	Direction	mvp_Pval	ukb_Pval	GWS_in_inputGWAS	HetPVal	pryGWAS_beta	pryGWAS_p	start	end	nearestGene	dist	func	biotype	CADD	RDB	Indep_loci	Cond_Sig	Pain-related trait in GWAS catalog and MVP (within 1 Mb upstream and downstream of lead SNP)	Novel pain loci
1	p36.23	rs12140566	1	8677188	T	G	0.0124041	0.00200067	0.1862	5.65e-10	++	1.81e-07	0.00046	N	0.3037	0.00953273	9.467e-09	8375842	8980238	RERE	0	intronic	protein_coding	2.709	3a	L1	Y	Pain (pleiotropy) (GCST90104572)	N
2	p35.2	rs2297600	1	32207581	T	G	-0.0149141	0.00204275	0.8235	2.85e-13	--	6.08e-07	8.7e-08	N	0.6353	-0.0120514	9.831e-14	32156940	32256590	BAI2	0	intronic	protein_coding	5.496	5	L2	Y	Pain intensity (PMID:38429522), Multisite chronic pain (GCST012332)	N
3	p34.3	rs218989	1	37166715	T	G	0.00941037	0.00167803	0.314	2.05e-08	++	0.00373313	3.4e-07	N	0.08485	0.00937844	7.16e-12	37082983	40138114	FTLP18	70256	intergenic	pseudogene	0.125		L3	Y	Pain intensity (PMID:38429522), Migraine (GCST90102553), Rheumatoid arthritis (GCST90013534)	N
3	p34.3	rs61781364	1	40019591	A	G	-0.0125777	0.00184695	0.7687	9.79e-12	--	2.62e-06	7.7e-07	N	0.7074	-0.0110468	3.881e-13	37082983	40138114	PPIEL	0	ncRNA_intronic	pseudogene	1.643	7	L4	Y	Pain (pleiotropy) (GCST90104572)	N
4	p34.1	rs499600	1	46039077	T	G	-0.0121885	0.00212381	0.1601	9.55e-09	--	2.64e-05	9.3e-05	N	0.9704	-0.0109768	4.603e-10	45451477	46885357	AKR1A1	3355	intergenic	protein_coding	2.685	4	L5	Y	Smoking initiation (GCST90243968)	Y
5	p33	rs10788928	1	50968097	A	T	0.010982	0.00155928	0.4767	1.88e-12	++	5.13e-06	5.6e-08	N	0.4087	0.00967361	6.135e-14	50698760	51827223	FAF1	0	intronic	protein_coding	1.063	2b	L6	Y	Multisite chronic pain (GCST012332), Pain (pleiotropy) (GCST90104572)	N
6	p31.1	rs61771920	1	73211920	A	T	0.0135282	0.00217216	0.8485	4.73e-10	++	8.05e-06	1.4e-05	N	0.9199	0.0114482	4.057e-09	72599170	74047756	RP4-660H19.1	2683	intergenic	lincRNA	1.862	6	L7	Y	Migraine (GCST003720), Osteoarthritis (GCST90271767)	N
7	p31.1	rs71658797	1	77967507	A	T	0.0178616	0.00242027	0.1173	1.59e-13	++	1.25e-09	1.6e-05	Y	0.3053	0.0135411	3.663e-12	77557339	78623626	AK5	0	intronic	protein_coding	10.96	5	L8	Y	Pain intensity (PMID:38429522)	N
8	p22.2	rs4656036	1	88815650	A	C	0.0130733	0.00239746	0.8801	4.95e-08	++	3.42e-06	0.0025	N	0.3252	0.0118352	7.092e-09	88653131	88881800	CTA-21C21.1	36664	intergenic	pseudogene	2.256	7	L9	Y	Smoking initiation (GCST90243968)	Y
9	p21.3	rs6658412	1	98309251	A	C	0.0108685	0.00184088	0.2335	3.55e-09	++	0.000113328	6.4e-06	N	0.5239	0.00956056	3.982e-11	98012711	98562260	DPYD	0	intronic	protein_coding	2.002	6	L10	Y	Pain (pleiotropy) (GCST90104572), Musculoskeletal pain factor (GCST90129462)	N
10	p13.2	rs12033257	1	112318484	A	G	0.0100266	0.001604	0.6194	4.07e-10	++	0.000617464	4.2e-08	Y	0.1005	0.0100266	4.067e-10	112272001	112347256	KCND3	0	UTR3	protein_coding	1.056	5	L11	Y	Multisite chronic pain (GCST012332)	N
11	p13.1	rs1289960	1	117926118	T	C	0.0113074	0.00183115	0.7629	6.63e-10	++	7.77e-07	0.00017	N	0.5145	0.00863622	4.526e-09	116977534	118926559	MAN1A2	0	intronic	protein_coding	1.12	5	L12	Y	Pain intensity (PMID:38429522), Osteoarthritis (hip) (GCST90034522)	N
11	p13.1	rs184701857	1	117962772	A	T	0.0405537	0.00721211	0.0118	1.88e-08	++	2.19e-06	0.0015	N	0.3492	0.0295425	9.161e-07	116977534	118926559	MAN1A2	0	intronic	protein_coding	10.17	7	L13	Y	Pain intensity (PMID:38429522), Osteoarthritis (hip) (GCST90034522)	N
11	p13.1	rs12144850	1	117995899	A	C	-0.0109483	0.00178428	0.7439	8.47e-10	--	3.65e-06	5.5e-05	N	0.8106	-0.00688	3.384e-06	116977534	118926559	MAN1A2	0	intronic	protein_coding	2.782	6	L14	Y	Pain intensity (PMID:38429522), Osteoarthritis (hip) (GCST90034522)	N
12	q21.2	rs509345	1	150276022	A	G	-0.0120497	0.00155882	0.52	1.07e-14	--	1.04e-05	4.3e-11	Y	0.07584	-0.00782206	8.496e-10	149673166	154218114	MRPS21	0	intronic	protein_coding	16.5		L15	Y	Multisite chronic pain (GCST012332), Chronic musculoskeletal pain (GCST90245879)	N
12	q21.2	rs115815732	1	150382759	T	C	0.0185927	0.00341025	0.9448	4.98e-08	++	2.38e-05	0.00053	N	0.707	0.0145094	4.243e-08	149673166	154218114	RPRD2	0	intronic	protein_coding	4.799	3a	L15	N	Multisite chronic pain (GCST012332), Chronic musculoskeletal pain (GCST90245879)	N
12	q21.2	rs9427216	1	153728239	A	G	0.00852483	0.00155847	0.4833	4.51e-08	++	0.000620484	1.4e-05	N	0.4153	0.00597204	2.771e-06	149673166	154218114	INTS3	0	intronic	protein_coding	2.115	7	L16	Y	Pain (pleiotropy) (GCST90104572)	N
13	q24.1	rs11576904	1	166878464	C	G	-0.00943554	0.00160523	0.3791	4.16e-09	--	3.79e-12	0.23	Y	0.0001008	-0.00828644	4.546e-10	166517996	168742357	RP4-782G3.1	1146	intergenic	lincRNA	4.131	1f	L17	Y	Pain intensity (PMID:38429522)	N
13	q24.1	rs373383692	1	168715416	T	G	0.00869673	0.00155855	0.4825	2.41e-08	++	0.000106882	5.7e-05	N	0.7852	0.00869673	2.405e-08	166517996	168742357	AL049798.1	1617	intergenic	miRNA	1.167	7	L18	Y	Smoking cessation (GCST90243968)	Y
14	q25.1	rs2901785	1	174104743	A	G	-0.0101193	0.00156621	0.4476	1.04e-10	--	2.71e-06	8.9e-06	N	0.9874	-0.00937434	2.422e-13	173429995	176895381	RP11-160H22.5	0	ncRNA_intronic	lincRNA	3.107	6	L19	Y	Pain intensity (PMID:38429522), Pain (pleiotropy) (GCST90104572)	N
14	q25.1	rs12138378	1	176589008	T	C	0.0212481	0.00348558	0.0527	1.09e-09	++	2.97e-06	8.5e-05	N	0.7306	0.0212481	1.087e-09	173429995	176895381	PAPPA2	0	intronic	protein_coding	4.217	6	L20	Y	Smoking initiation (GCST90243968)	Y
15	q31.2	rs1246725	1	191350825	C	G	-0.0098698	0.00155847	0.5168	2.4e-10	--	5.57e-08	0.00052	N	0.2304	-0.00825696	8.804e-11	190814038	191459679	RP11-309H21.2	153227	intergenic	lincRNA	0.793	7	L21	Y	Pain intensity (PMID:38429522)	N
16	q31.3	rs9943176	1	198189485	A	G	-0.00999442	0.00183249	0.7634	4.92e-08	--	2.3e-06	0.0033	N	0.2706	-0.0101909	3.093e-12	198099990	198525030	NEK7	0	intronic	protein_coding	5.896	5	L22	Y	Back pain (GCST90103483)	N
17	q32.1	rs10920270	1	201856521	C	G	0.0103254	0.00175096	0.7284	3.69e-09	++	9.9e-05	7.9e-06	N	0.5605	0.00586044	4.431e-05	201685606	201919960	SHISA4	1286	intergenic		8.883	4	L23	Y	Smoking initiation (GCST90243985)	Y
18	q43	rs34967813	1	237841390	A	G	0.0109869	0.00168331	0.6896	6.71e-11	++	1.73e-10	0.0061	Y	0.01723	0.00802403	9.733e-09	237830895	237948762	RYR2	0	exonic	protein_coding	22.6	4	L24	Y	Pain intensity (PMID:38429522)	N
19	q43	rs5782261	1	243421494	T	TA	-0.0116997	0.00165273	0.6672	1.46e-12	--	9.08e-06	2e-08	Y	0.2978	-0.00926467	9.648e-12	243098453	244011942	SDCCAG8	0	intronic	protein_coding	0.117		L25	Y	Pain intensity (PMID:38429522), Multisite chronic pain (GCST008512)	N
19	q43	rs35570502	1	243728212	T	C	-0.013539	0.00224378	0.8599	1.6e-09	--	2.64e-08	0.0038	Y	0.08745	-0.0112839	2.967e-10	243098453	244011942	AKT3	0	intronic	protein_coding	4.736	7	L25	N	Pain intensity (PMID:38429522), Multisite chronic pain (GCST008512)	N
20	p25.3	rs6742365	2	1793809	T	C	0.0126439	0.00221823	0.856	1.2e-08	++	1.18e-06	0.0016	N	0.3008	0.00916786	1.826e-07	1782479	1969755	MYT1L	0	UTR3		11.75		L26	Y	Smoking initiation (GCST90243985)	Y
21	p25.2	rs6721975	2	5832667	T	C	-0.0151124	0.00269287	0.2314	2e-08	?-		2e-08	Y	1			5712068	5939162	SOX11	131	upstream		15.07	4	L27	Y	Multisite chronic pain (GCST012332)	N
21	p25.2	rs147903676	2	5835352	CT	C	0.0138349	0.00235648	0.1248	4.32e-09	++	0.000784745	5.8e-07	N	0.182	0.0101392	1.634e-07	5712068	5939162	SOX11	0	UTR3		19.48		L27	N	Multisite chronic pain (GCST012332)	N
22	p24.3	rs13012094	2	16631289	T	C	0.00937308	0.00170606	0.704	3.93e-08	++	3.32e-05	0.00031	N	0.8252	0.00773519	1.403e-08	16576164	16782979	AC010880.1	17318	intergenic	lincRNA	16.22	7	L28	Y	Rheumatoid arthritis (GCST002318)	N
23	p24.1	rs61533748	2	22582968	T	C	-0.0104211	0.0015998	0.6141	7.32e-11	--	1.11e-06	1.5e-05	N	0.8493	-0.00905245	2.893e-12	22430795	22753950	AC068490.2	0	ncRNA_intronic	lincRNA	4.248	7	L29	Y	Pain (pleiotropy) (GCST90104572)	N
24	p23.3	rs6705514	2	27213937	T	C	-0.0119679	0.00159444	0.3931	6.12e-14	--	3.85e-13	0.0012	Y	0.008752	-0.0114348	2.038e-18	26937669	27386349	MAPRE3	0	ncRNA_intronic	protein_coding	0.008	7	L30	Y	Pain intensity (PMID:38429522)	N
25	p23.1	rs13409142	2	32666137	T	C	-0.00950253	0.00163078	0.6481	5.66e-09	--	3.01e-06	0.0004	N	0.5314	-0.00866908	8.047e-11	31678065	32946773	BIRC6	0	intronic	protein_coding	2.311	7	L31	Y	Pain intensity (PMID:38429522), Osteoarthritis of the hip or knee (GCST007092, GCST90034521), osteoarthritis (GCST007093), Knee osteoarthritis (GCST006925, GCST007090)	N
26	p16.3	rs76376207	2	51093698	T	C	0.0189552	0.00302847	0.0712	3.89e-10	++	1.1e-08	0.0022	Y	0.09104	0.0174774	4.609e-12	50884338	53391441	NRXN1	0	intronic	protein_coding	1.589	6	L32	Y	Pain intensity (PMID:38429522)	N
26	p16.3	rs1516180	2	51932130	T	C	-0.0137363	0.00234208	0.1266	4.49e-09	--	3.11e-10	0.061	Y	0.003158	-0.0114861	1.005e-08	50884338	53391441	AC007682.1	0	ncRNA_intronic	lincRNA	8.889	6	L33	Y	Pain intensity (PMID:38429522)	N
26	p16.3	rs1376569	2	53087260	T	C	-0.0113941	0.00157704	0.4217	5.01e-13	--	5.91e-10	7.4e-05	Y	0.1731	-0.00856496	5.299e-11	50884338	53391441	AC010967.2	0	ncRNA_intronic	lincRNA	6.846		L34	Y	Pain intensity (PMID:38429522)	N
27	p16.1	rs71420327	2	59777138	T	C	-0.0172555	0.00251428	0.8925	6.76e-12	--	5.94e-07	2.5e-06	N	0.9978	-0.0111242	1.925e-08	59312947	60532802	RP11-444A22.1	0	ncRNA_intronic	lincRNA	4.524	6	L35	Y	Pain intensity (PMID:38429522), Methadone dose in opioid dependence (GCST004136)	N
27	p16.1	rs359258	2	60486157	T	C	-0.00994786	0.00161544	0.3674	7.35e-10	--	6.36e-07	0.00022	N	0.468	-0.010578	1.535e-15	59312947	60532802	AC007381.3	91572	intergenic	lincRNA	3.203	5	L36	Y	Pain intensity (PMID:38429522), Methadone dose in opioid dependence (GCST004136)	N
28	p12	rs1434074	2	80711752	A	T	-0.0144656	0.00261301	0.2528	3.1e-08	?-		3.1e-08	Y	1	-0.00933654	5.917e-07	80475448	83550605	CTNNA2	0	intronic	protein_coding	8.274	6	L37	Y	Multisite chronic pain (GCST012332)	N
28	p12	rs60160168	2	83102299	A	C	0.0200988	0.00360776	0.049	2.53e-08	++	2.76e-07	0.0076	N	0.1137	0.0168947	2.205e-09	80475448	83550605	AC098817.5	17413	intergenic	pseudogene	0.582	7	L38	Y	Smoking initiation (GCST90243968)	Y
29	q11.2	rs4850917	2	100493439	A	G	0.00973289	0.00160556	0.6213	1.35e-09	++	0.000880207	1.1e-07	N	0.1133	0.0093276	1.457e-12	100202482	100543061	AFF3	0	intronic	protein_coding	1.137	7	L39	Y	Multisite chronic pain (GCST012332), Pain (pleiotropy) (GCST90104572)	N
30	q12.1	rs264934	2	104295479	T	G	0.00939324	0.00156294	0.5413	1.85e-09	++	3.04e-07	0.00087	N	0.2765	0.00636373	6.352e-07	103970751	104690832	AC018880.2	55190	intergenic		1.021	6	L40	Y	Pain intensity (PMID:38429522), smoking initiation (GCST008810)	N
30	q12.1	rs2582974	2	104578923	T	C	0.0095997	0.00158411	0.4089	1.36e-09	++	3.09e-10	0.031	Y	0.00603	0.00694103	1.078e-07	103970751	104690832	RP11-76I14.1	0	ncRNA_intronic		0.077		L41	Y	Pain intensity (PMID:38429522), smoking status (GCST007468)	N
31	q22.3	rs10169606	2	144492914	C	G	0.00926801	0.00160208	0.617	7.27e-09	++	5.54e-07	0.0018	N	0.2454	0.00884874	1.978e-11	144376402	144511229	ARHGAP15	0	ncRNA_intronic	protein_coding	1.655	7	L42	Y	Pain intensity (PMID:38429522), Migraine (GCST90102553)	N
32	q24.2	rs6755927	2	160417561	A	G	-0.0159308	0.00256659	0.1026	5.4e-10	--	9.79e-08	0.00069	N	0.2358	-0.0135027	4.568e-10	160049432	161038846	BAZ2B	0	intronic	protein_coding	1.242	7	L43	Y	Opioid use disorder (GCST90296425)	Y
33	q31.1	rs12994080	2	171599082	A	G	0.0122032	0.00162169	0.3608	5.27e-14	++	1.26e-08	8.1e-07	Y	0.7547	0.00943469	1.69e-12	171570488	172052632	AC007405.4	0	ncRNA_intronic	lincRNA	1.312	7	L44	Y	Pain intensity (PMID:38429522), smoking status (GCST007468)	N
34	q33.3	rs55772859	2	208042581	A	C	0.0120945	0.00167699	0.3147	5.5e-13	++	9.25e-07	1.1e-07	N	0.6175	0.010915	9.027e-16	207886157	212344135	AC007879.1	0	ncRNA_intronic	lincRNA	0.619	6	L45	Y	Pain intensity (PMID:38429522)	N
34	q33.3	rs13023972	2	208507674	T	C	-0.0103276	0.00156431	0.5463	4.04e-11	--	3.06e-09	0.00085	Y	0.1016	-0.00648336	3.806e-07	207886157	212344135	AC079767.3	11830	intergenic		1.006	7	L46	Y	Pain intensity (PMID:38429522)	N
34	q33.3	rs35851828	2	211359390	T	TG	0.0129053	0.0017919	0.7472	5.93e-13	++	1.24e-06	8.5e-08	N	0.5664	0.0102319	1.945e-12	207886157	212344135	CPS1	0	intronic	protein_coding	4.238		L47	Y	Pain (pleiotropy) (GCST90104572), General pain factor (GCST90129461)	N
34	q33.3	rs4673545	2	211565535	A	C	-0.00955842	0.00174775	0.7268	4.52e-08	--	0.000322847	3.2e-05	N	0.575	-0.00647741	2.087e-06	207886157	212344135	CPS1	21703	intergenic		2.214	6	L47	N	Pain (pleiotropy) (GCST90104572), General pain factor (GCST90129461)	N
34	q33.3	rs16825008	2	212304841	A	G	-0.00984876	0.00166843	0.6792	3.57e-09	--	0.00033098	1.6e-06	N	0.3027	-0.00741786	4.641e-08	207886157	212344135	ERBB4	0	intronic	protein_coding	4.28	7	L48	Y	Pain (pleiotropy) (GCST90104572), General pain factor (GCST90129461)	N
35	q35	rs2280039	2	220363488	A	G	0.00967193	0.00163875	0.6554	3.59e-09	++	3.19e-08	0.0062	Y	0.07178	0.00877366	6.476e-11	220339466	222982586	AC053503.11	0	ncRNA_intronic	antisense	9.373		L49	Y	Pain intensity (PMID:38429522)	N
35	q35	rs4674625	2	222893936	T	C	0.00885347	0.00155953	0.4751	1.37e-08	++	4.07e-07	0.0037	N	0.1735	0.00731431	9.266e-09	220339466	222982586	AC009302.4	15307	intergenic	pseudogene	1.652	6	L50	Y	Pain intensity (PMID:38429522), Insomnia (GCST90131901), Depression (GCST90018833)	N
36	p24.3	rs62237509	3	20724955	A	T	-0.00974818	0.00175896	0.2677	2.99e-08	--	0.00020807	3.4e-05	N	0.636	-0.00856741	2.912e-09	20379347	20754619	RNU6-815P	175706	intergenic	snRNA	5.947	7	L51	Y	Osteoarthritis (GCST90034520)	N
37	p22.3	rs2336653	3	34549511	A	C	0.0164754	0.00292481	0.9232	1.78e-08	++	1.88e-05	0.00024	N	0.7942	0.01149	2.074e-06	34322319	34812897	AC018359.1	0	ncRNA_intronic		1.471	7	L52	Y	Smoking initiation (GCST90243968)	Y
38	p21.31	rs7653505	3	49518023	A	G	-0.0235423	0.00315454	0.9348	8.48e-14	--	3.69e-07	4.1e-08	Y	0.6123	-0.0235423	8.475e-14	48518906	53251598	DAG1	0	intronic	protein_coding	2.595	7	L53	N	Pain intensity (PMID:38429522), Multisite chronic pain (GCST008512)	N
38	p21.31	rs73079014	3	49863483	T	C	-0.0176299	0.00237535	0.1225	1.15e-13	--	6.48e-11	0.0001	Y	0.09941	-0.0143772	5.711e-16	48518906	53251598	TRAIP	2550	intergenic	protein_coding	4.515	5	L53	N	Pain intensity (PMID:38429522), Multisite chronic pain (GCST008512)	N
38	p21.31	rs1317154	3	49910084	T	C	-0.0157525	0.00155781	0.4906	4.9e-24	--	3.7e-20	6.2e-07	Y	0.007401	-0.0139537	6.633e-28	48518906	53251598	ACTBP13	695	downstream	pseudogene	9.246	5	L53	Y	Pain intensity (PMID:38429522), Multisite chronic pain (GCST008512; GCST012332)	N
38	p21.31	rs150628303	3	49955296	A	G	-0.02034	0.00338155	0.9438	1.8e-09	--	1.83e-10	0.045	Y	0.003583	-0.0202688	8.778e-12	48518906	53251598	MON1A	0	intronic	protein_coding	7.006	7	L53	N	Pain intensity (PMID:38429522), Multisite chronic pain (GCST008512; GCST012332)	N
38	p21.31	rs142344547	3	49956036	A	G	-0.02538	0.00329996	0.0592	1.47e-14	--	5.42e-10	3.7e-06	Y	0.3746	-0.0198776	1.612e-15	48518906	53251598	MON1A	0	intronic	protein_coding	2.617	7	L53	N	Pain intensity (PMID:38429522), Multisite chronic pain (GCST008512; GCST012332)	N
38	p21.31	rs114783302	3	50566730	A	G	-0.025643	0.00464884	0.0289	3.47e-08	--	0.000385689	1.9e-05	N	0.4976	-0.0217176	1.035e-07	48518906	53251598	CACNA2D2	25054	intergenic		0.042	5	L53	N	Pain intensity (PMID:38429522), Multisite chronic pain (GCST008512; GCST012332)	N
38	p21.31	rs2153451712	3	52646903	CA	C	0.0122513	0.00219165	0.3921	2.27e-08	+?	2.27e-08		Y	1			48518906	53251598	PBRM1	0	intronic	protein_coding	1.286		L54	Y	Pain intensity (PMID:38429522), Multisite chronic pain (GCST008512; GCST012332)	N
39	p14.1	rs6787449	3	67905314	A	G	-0.0149171	0.00256882	0.1024	6.35e-09	--	5.01e-08	0.0073	N	0.07419	-0.0113739	7.144e-08	67858297	68268866	RP11-81N13.1	0	ncRNA_intronic		2.467	4	L55	Y	Pain intensity (PMID:38429522)	N
40	p12.3	rs4334682	3	74949456	T	C	-0.0126029	0.00209663	0.1653	1.85e-09	--	5.5e-09	0.01	Y	0.03367	-0.00962431	5.487e-08	74710819	77706846	NIPA2P2	183849	intergenic		2.332	5	L56	Y	Pain intensity (PMID:38429522), cocaine use (GCST009384), smoking initiation (GCST007468)	N
40	p12.3	rs11128505	3	76211681	A	C	0.00938776	0.00155839	0.516	1.7e-09	++	1.14e-07	0.0016	N	0.1804	0.00726308	1.177e-08	74710819	77706846	ROBO2	0	intronic	protein_coding	2.615	6	L57	Y	Pain intensity (PMID:38429522)	N
40	p12.3	rs35149182	3	77307430	A	C	-0.0114977	0.00176021	0.2671	6.48e-11	--	6.66e-09	0.00075	Y	0.1276	-0.00725902	1.329e-06	74710819	77706846	ROBO2	0	intronic	protein_coding	1.543	7	L58	Y	Pain intensity (PMID:38429522)	N
40	p12.3	rs5850333	3	77607070	A	AC	0.0111241	0.00171404	0.2913	8.59e-11	++	3.56e-07	4.9e-05	N	0.5919	0.00814959	8.928e-09	74710819	77706846	ROBO2	0	intronic	protein_coding	3.247		L58	N	Pain intensity (PMID:38429522)	N
41	p12.1	rs144433312	3	84591507	A	AT	0.0130656	0.00227149	0.5062	8.8e-09	?+		8.8e-09	Y	1			84048375	84844532	AC107025.1	45692	intergenic		1.019		L59	Y	Multisite chronic pain (GCST012332)	N
42	q13.12	rs62263345	3	107252190	A	G	-0.0198803	0.00329471	0.8622	1.6e-09	?-		1.6e-09	Y	1	-0.0121402	8.191e-07	106990475	107698638	BBX	0	intronic	protein_coding	7.915	5	L60	Y	Multisite chronic pain (GCST012332)	N
43	q13.31	rs16823659	3	115011917	T	C	0.0112021	0.00191949	0.7922	5.34e-09	++	0.000693252	9.1e-07	N	0.2122	0.0079821	1.133e-07	114434158	117983751	RP11-190P13.2	7722	intergenic		0.201	5	L61	Y	Cannabis use disorder (GCST90296427), Alcohol use disorder (GCST90296428)	Y
43	q13.31	rs199898097	3	117604954	A	ATATATATT	0.011066	0.00175958	0.2674	3.2e-10	++	6.85e-06	1.1e-05	N	0.9082	0.011066	3.198e-10	114434158	117983751	LSAMP	00:00:00	ncRNA_intronic	protein_coding	0.907		L62	Y	Back pain (GCST90103484)	N
44	q22.2	rs9852075	3	135947144	T	G	-0.0129143	0.00181152	0.7553	1.01e-12	--	3.23e-06	4.9e-08	Y	0.4368	-0.011905	1.165e-15	135468347	136947138	PCCB	22003	intergenic	protein_coding	2.197	6	L63	Y	Pain intensity (PMID:38429522), Multisite chronic pain (GCST008512; GCST012332)	N
45	q29	rs11927266	3	196816845	A	C	0.00966741	0.00166967	0.6801	7.05e-09	++	0.000527195	1.9e-06	N	0.2757	0.00611636	7.591e-06	196781206	197050392	DLG1	0	intronic	protein_coding	6.03	7	L64	Y	Smoking initiation (GCST90243968)	Y
46	p16.3	rs34884217	4	944210	A	C	-0.0148466	0.00249103	0.8902	2.52e-09	--	0.000394614	8.2e-07	N	0.2466	-0.0108988	9.799e-07	708132	3448228	TMEM175	0	exonic:splicing		0.091		L65	Y	Back pain (GCST90103484)	N
46	p16.3	rs12509340	4	2688719	A	G	-0.0159172	0.00270516	0.9088	4e-09	--	8.16e-06	0.00012	N	0.7951	-0.0114973	6.32e-07	708132	3448228	FAM193A	0	intronic	protein_coding	3.271	2b	L66	N	Pain intensity (PMID:38429522), cigarettes per day (GCST008809)	N
46	p16.3	rs12503220	4	2850142	A	G	0.0113832	0.00198521	0.19	9.8e-09	++	2.44e-06	0.00078	N	0.4315	0.00917183	4.378e-08	708132	3448228	ADD1	0	intronic	protein_coding	1.466	6	L66	N	Pain intensity (PMID:38429522), cigarettes per day (GCST008809)	N
46	p16.3	rs11937729	4	3017169	T	C	0.0122968	0.00166623	0.6776	1.58e-13	++	1.07e-08	2.7e-06	Y	0.6124	0.0100628	4.467e-14	708132	3448228	GRK4	0	intronic	protein_coding	4.75	6	L66	Y	Pain intensity (PMID:38429522), cigarettes per day (GCST008809)	N
46	p16.3	rs73193340	4	3281799	A	G	-0.0150556	0.00229053	0.8666	4.94e-11	--	3.5e-08	0.00019	Y	0.2867	-0.0130152	1.12e-11	708132	3448228	MSANTD1	8333	intergenic	protein_coding	5.326	5	L67	Y	Pain intensity (PMID:38429522), cigarettes per day (GCST008809)	N
47	p16.1	rs4428285	4	6952251	A	G	-0.012297	0.00194882	0.8005	2.79e-10	--	6.55e-06	1e-05	N	0.9015	-0.00859945	1.088e-07	6913449	7111052	TBC1D14	0	intronic	protein_coding	6.318	5	L68	Y	Migraine or type 2 diabetes (GCST90244660)	N
48	p15.2	rs34811474	4	25408838	A	G	-0.0165881	0.00186467	0.2251	5.77e-19	--	1.88e-09	4.2e-11	Y	0.4955	-0.0137494	1.443e-19	25111387	25459798	ANAPC4	0	exonic	protein_coding	23.7	6	L69	Y	Pain intensity (PMID:38429522), Multisite chronic pain (GCST008512; GCST012332)	N
49	q12	rs75801206	4	56424426	A	G	-0.00918637	0.00162103	0.6385	1.45e-08	--	4.04e-07	0.0039	N	0.1694	-0.00694835	1.281e-07	56046659	56534563	PDCL2	0	intronic	protein_coding	3.014	6	L70	Y	Pain (pleiotropy) (GCST90104572)	N
50	q13.2	rs62305486	4	67060118	T	C	-0.00949066	0.00173377	0.7196	4.39e-08	--	4.45e-09	0.079	Y	0.006058	-0.00830663	4.528e-09	67041359	68058681	RP11-25H12.1	44387	intergenic	lincRNA	0.771	6	L71	N	Pain intensity (PMID:38429522), Pain (pleiotropy) (GCST90104572)	N
50	q13.2	rs17087844	4	67863736	T	C	-0.0109963	0.00156865	0.5593	2.39e-12	--	4.66e-07	1.1e-06	N	0.9279	-0.00821947	1.252e-10	67041359	68058681	RNU6-699P	100646	intergenic	snRNA	0.178	5	L71	Y	Pain intensity (PMID:38429522), Pain (pleiotropy) (GCST90104572)	N
51	q24	rs201081507	4	102681041	A	G	-0.0279446	0.00491464	0.9434	1.3e-08	?-		1.3e-08	Y	1			102321252	104069822	BANK1	0	intronic	protein_coding	2.941	6	L72	N	Pain intensity (PMID:38429522), Multisite chronic pain (GCST008512; GCST012332, GCST012334)	N
51	q24	rs13107325	4	103188709	T	C	0.0313719	0.00288876	0.0789	1.79e-27	++	1.11e-15	2.3e-13	Y	0.8721	0.0248834	9.679e-20	102321252	104069822	SLC39A8	0	exonic	protein_coding	23.1	5	L72	Y	Pain intensity (PMID:38429522), Multisite chronic pain (GCST008512; GCST012332, GCST012334)	N
52	q28.2	rs72516830	4	130244072	A	AC	0.0104181	0.00187275	0.2224	2.65e-08	++	2.15e-08	0.03	Y	0.02381	0.0105651	7.747e-12	130127544	130402750	RP11-419L4.1	17894	intergenic	lincRNA	2.859		L73	Y	Pain intensity (PMID:38429522)	N
53	q31.1	rs12512994	4	140785515	T	G	-0.010827	0.00166774	0.3213	8.45e-11	--	6.6e-06	2.8e-06	N	0.7491	-0.00797097	9.919e-09	140725750	140977925	MAML3	0	intronic	protein_coding	1.362	5	L74	N	Pain intensity (PMID:38429522), Multisite chronic pain (GCST008512)	N
53	q31.1	rs13136239	4	140908755	A	G	-0.0158936	0.00164564	0.3386	4.55e-22	--	6.82e-16	3.5e-08	Y	0.1277	-0.0137798	8.321e-25	140725750	140977925	MAML3	0	intronic	protein_coding	3.311	4	L74	Y	Pain intensity (PMID:38429522), Multisite chronic pain (GCST008512)	N
54	p13.3	rs56070621	5	30825684	A	T	0.0104741	0.00158172	0.587	3.55e-11	++	6.57e-07	1.2e-05	N	0.8224	0.0113424	1.217e-18	30580918	30914671	RPL19P11	227987	intergenic	pseudogene	2.537	7	L75	Y	Pain (FinnGen)	N
55	q12.3	rs6869446	5	65570607	T	C	-0.0133794	0.00233457	0.6156	1e-08	?-		1e-08	Y	1	-0.00650883	7.861e-05	65535648	65598729	RP11-305P14.1	23688	intergenic		0.131	6	L76	Y	Multisite chronic pain (GCST012332)	N
56	q14.3	rs139532049	5	92431449	A	G	0.00949943	0.00161692	0.6342	4.22e-09	++	1.99e-06	0.00043	N	0.4852	0.00777132	2.568e-09	92255166	93688984	CTD-2091N23.1	27073	intergenic	lincRNA	1.832	7	L77	Y	Pain intensity (PMID:38429522)	N
56	q14.3	rs10078941	5	93279029	T	C	-0.0167874	0.0023203	0.1294	4.65e-13	--	1.49e-08	5.6e-06	Y	0.5634	-0.0127928	1.748e-09	92255166	93688984	FAM172A	0	intronic	protein_coding	3.605	7	L78	Y	Pain intensity (PMID:38429522)	N
57	q21.2	rs34073570	5	103998895	CT	C	-0.0150001	0.00231949	0.3986	1e-10	?-		1e-10	Y	1	-0.0101442	3.404e-10	103044989	104996076	RP11-6N13.1	0	ncRNA_intronic	lincRNA	1.733		L79	Y	Multisite chronic pain (GCST012332)	N
58	q23.1	rs6595242	5	119923983	T	G	-0.00895204	0.00161618	0.3666	3.05e-08	--	9.44e-05	8.4e-05	N	0.8534	-0.00730301	5.08e-08	119913953	120486814	PRR16	0	intronic	protein_coding	4.094	7	L80	N	Pain intensity (PMID:38429522), Multisite chronic pain (GCST008512)	N
58	q23.1	rs7717562	5	120155940	A	T	-0.0150947	0.00171297	0.7081	1.23e-18	--	1.66e-15	1.1e-05	Y	0.02371	-0.0104475	2.642e-14	119913953	120486814	CTD-2334D19.1	29466	intergenic	lincRNA	3.412	5	L80	Y	Pain intensity (PMID:38429522), Multisite chronic pain (GCST008512)	N
59	q31.1	rs35096828	5	133897439	T	C	0.0126667	0.00173469	0.7201	2.83e-13	++	2.45e-10	8.5e-05	Y	0.1387	0.0112264	3.85e-15	133793417	134258009	JADE2	0	intronic	protein_coding	4.866	4	L81	Y	Pain intensity (PMID:38429522)	N
60	q33.2	rs2963998	5	153177053	T	C	-0.0100006	0.00155967	0.5258	1.44e-10	--	6.3e-10	0.0053	Y	0.02708	-0.00899552	1.774e-12	153053621	153483653	GRIA1	0	intronic	protein_coding	2.784		L82	Y	Pain intensity (PMID:38429522)	N
61	q34	rs6892693	5	160057496	A	G	0.0119437	0.00210796	0.8369	1.46e-08	++	7.51e-05	4.9e-05	N	0.8104	0.00943584	9.848e-08	159975438	161179137	ATP10B:CTC-348L5.1	00:00:00	ncRNA_intronic		3.139	6	L83	Y	Multisite chronic pain (GCST012332)	N
61	q34	rs1946247	5	160836620	T	G	-0.0126113	0.00219441	0.1478	9.06e-09	--	0.00529779	5.9e-08	N	0.04195	-0.0110025	3.219e-09	159975438	161179137	GABRB2	0	intronic	protein_coding	2.186	5	L83	N	Multisite chronic pain (GCST012332)	N
61	q34	rs62381583	5	160941481	A	G	0.0101458	0.00176295	0.7342	8.69e-09	++	0.00180073	3.8e-07	N	0.1197	0.00899204	1.065e-09	159975438	161179137	GABRB2	0	intronic	protein_coding	10.87	6	L84	Y	Multisite chronic pain (GCST012332)	N
62	q34	rs4869025	5	166698422	T	G	-0.0169955	0.0031042	0.0675	4.38e-08	--	2.78e-09	0.094	Y	0.004271	-0.0125373	9.746e-07	166545847	166843682	TENM2	13381	intergenic		15.86	5	L85	Y	Pain intensity (PMID:38429522), Pain sensitivity (PMC9393798), Response to buprenorphine in opioid use disorder (GCST90044777)	N
63	q35.1	rs11745599	5	170207363	A	C	0.0092745	0.00168169	0.6885	3.5e-08	++	0.00070768	8.7e-06	N	0.3605	0.00701858	1.9e-07	170197927	170894847	MIR4454	0	ncRNA_intronic		0.177	7	L85	N	Migraine disorder (GCST90244660)	N
63	q35.1	rs34772405	5	170831912	T	C	-0.00991725	0.00156325	0.5425	2.23e-10	--	0.000224838	9.5e-08	N	0.1758	-0.00922455	5.176e-13	170197927	170894847	NPM1	0	intronic	protein_coding	0.44	5	L86	Y	Migraine disorder (GCST90244660)	N
64	p24.1	rs9349379	6	12903957	A	G	0.0100116	0.00158737	0.5964	2.84e-10	++	0.000400635	5.3e-08	N	0.1253	0.00757759	4.118e-09	12758654	12982423	PHACTR1	0	intronic	protein_coding	5.478	6	L87	Y	Pain (pleiotropy) (GCST90104572)	N
65	p21.31	rs3818528	6	33661091	A	G	-0.0119411	0.00161672	0.634	1.51e-13	--	1.68e-07	1.8e-07	N	0.8327	-0.0105505	3.84e-15	33515520	36608267	ITPR3	0	intronic	protein_coding	3.455	1f	L88	N	Pain intensity (PMID:38429522), Insomnia (GCST90131901, GCST007988)	N
65	p21.31	rs17529077	6	33793332	C	G	0.0189674	0.00310483	0.8409	1e-09	?+		1e-09	Y	1	0.0101769	6.864e-07	33515520	36608267	MLN	21543	intergenic		1.625	5	L88	N	Pain intensity (PMID:38429522), Insomnia (GCST90131901, GCST007988)	N
65	p21.31	rs552109265	6	34785628	A	AT	0.0190287	0.00203059	0.1792	7.21e-21	++	2.47e-14	2.5e-08	Y	0.2414	0.0107247	6.638e-17	33515520	36608267	UHRF1BP1	0	intronic	protein_coding	1.379		L88	Y	Pain intensity (PMID:38429522), Multisite chronic pain (GCST008512)	N
65	p21.31	rs2077750	6	35089811	A	G	-0.0118805	0.00196566	0.195	1.5e-09	--	1.27e-05	2.9e-05	N	0.96	-0.0095155	3.067e-09	33515520	36608267	TCP11	0	intronic	protein_coding	0.248	7	L88	N	Pain intensity (PMID:38429522), Multisite chronic pain (GCST008512)	N
65	p21.31	rs33959228	6	35259397	T	C	0.0348714	0.00526281	0.0224	3.45e-11	++	0.000217329	9.6e-09	Y	0.101	0.0278182	2.621e-11	33515520	36608267	ZNF76	0	exonic	protein_coding	26.5	5	L88	N	Pain intensity (PMID:38429522), Multisite chronic pain (GCST008512)	N
65	p21.31	rs9368926	6	36359881	T	C	-0.00921148	0.00157542	0.575	5.02e-09	--	2.02e-05	6.3e-05	N	0.9911	-0.00723775	1.579e-08	33515520	36608267	PXT1	0	intronic	protein_coding	1.842	6	L88	N	Pain intensity (PMID:38429522), Multisite chronic pain (GCST008512)	N
66	p12.3	rs6922746	6	50889828	A	T	-0.00965146	0.00172965	0.7174	2.41e-08	--	5.77e-05	0.00011	N	0.9549	-0.00711677	2.567e-07	50640125	50977502	FTH1P5	8858	intergenic		0.338	7	L89	Y	Smoking initiation (GCST90243985)	Y
67	q12	rs56016894	6	69610898	A	T	-0.0174984	0.00244118	0.885	7.59e-13	--	6.28e-10	0.0001	Y	0.159	-0.0121471	9.26e-10	69363560	70261968	BAI3	0	intronic	protein_coding	1.651	6	L90	Y	Pain intensity (PMID:38429522)	N
68	q14.2	rs12193842	6	84322158	A	C	-0.0135882	0.00165932	0.6724	2.64e-16	--	1.57e-11	1.7e-06	Y	0.2545	-0.0121038	7.351e-19	84196990	84456394	SNAP91	0	intronic	protein_coding	4.453	7	L91	Y	Pain intensity (PMID:38429522)	N
69	q16.1	rs12524320	6	94647235	A	G	0.009664	0.00157011	0.563	7.49e-10	++	0.000129812	8.9e-07	N	0.3407	0.00875054	7.727e-12	94460497	94919277	RP11-524K14.1	48106	intergenic	lincRNA	2.567	7	L92	Y	Smoking initiation (GCST90243968)	Y
70	q16.1	rs9398662	6	98489561	T	C	0.00893038	0.00157225	0.5681	1.35e-08	++	2.7e-09	0.049	Y	0.008127	0.00651673	4.703e-07	98297832	98627410	RP11-436D23.1	0	ncRNA_intronic		16.28	5	L93	Y	Pain intensity (PMID:38429522)	N
71	q16.3	rs413130	6	105398087	T	C	0.00993859	0.00156341	0.5431	2.06e-10	++	0.000146753	1.6e-07	N	0.2259	0.00777182	1.253e-09	104976837	105528088	LIN28B	6835	intergenic	protein_coding	8.343		L94	Y	Rheumatoid arthritis (GCST002318)	N
72	q21	rs113630303	6	112108587	C	G	-0.0223864	0.00396009	0.9597	1.58e-08	--	0.00484221	1.5e-07	N	0.05863	-0.0206044	1.471e-10	111505794	112433176	FYN	0	intronic	protein_coding	1.497	7	L95	Y	Migraine (GCST90102553)	N
72	q21	rs10687473	6	112258739	A	AAAAT	-0.0121774	0.00221568	0.8556	3.89e-08	--	6.5e-05	0.00016	N	0.993	-0.0118181	2.503e-10	111505794	112433176	RP1-97J1.2	35684	intergenic	lincRNA	1.363		L95	N	Migraine (GCST90102553)	N
73	q22.32	rs1490384	6	126851160	T	C	-0.00861047	0.00155761	0.5019	3.24e-08	--	1.13e-05	0.00067	N	0.5926	-0.00828768	7.312e-11	126572573	129566200	MIR588	45300	intergenic	miRNA	18.6	7	L96	Y	Smoking initiation (GCST90243968)	Y
73	q22.32	rs4337952	6	129338913	A	C	0.00995215	0.00167629	0.6848	2.91e-09	++	5.15e-05	1.3e-05	N	0.6914	0.00884432	1.571e-10	126572573	129566200	LAMA2	0	intronic	protein_coding	4.478	6	L97	Y	Pain (pleiotropy) (GCST90104572)	N
74	q25.1	rs1913475	6	152245756	T	C	0.0102037	0.00162972	0.3529	3.82e-10	++	1.63e-10	0.019	Y	0.007441	0.0109894	1.695e-16	152196952	152392233	ESR1	0	intronic	protein_coding	2.07		L98	Y	Pain intensity (PMID:38429522), Osteoporosis (GCST90086122)	N
75	q26	rs370097730	6	163033062	G	GA	0.0104005	0.00187396	0.222	2.86e-08	++	9.64e-08	0.015	N	0.05915	0.00962791	1.072e-10	162933253	163320074	PARK2	0	intronic	protein_coding	1.497		L99	N	Pain intensity (PMID:38429522), Insomnia (GCST90131901, GCST007988)	N
75	q26	rs35754151	6	163074867	A	G	0.0137525	0.0024123	0.8818	1.19e-08	++	2.56e-05	0.00012	N	0.9306	0.0128605	1.527e-09	162933253	163320074	PARK2	0	intronic	protein_coding	6.152	6	L99	Y	Pain intensity (PMID:38429522), Insomnia (GCST90131901, GCST007988)	N
76	p22.3	rs112302425	7	1080772	G	GGA	0.0100922	0.00163173	0.649	6.2e-10	++	0.000308657	2.1e-07	N	0.1924	0.0100619	1.145e-13	964207	6884042	C7orf50	0	ncRNA_intronic	protein_coding	9.006		L100	N	Pain intensity (PMID:38429522), Neuropathic pain in head and neck cancer (GCST005934)	N
76	p22.3	rs1403174	7	2032865	A	T	0.0107727	0.00158166	0.4131	9.7e-12	++	7.18e-08	2.5e-05	N	0.5311	0.00926069	1.063e-12	964207	6884042	MAD1L1	0	intronic	protein_coding	5.967	5	L100	N	Pain intensity (PMID:38429522), Neuropathic pain in head and neck cancer (GCST005934)	N
76	p22.3	rs151034593	7	2081006	G	GGCTGGGGAAGGGGAGCAGGA	-0.018747	0.00209862	0.1649	4.16e-19	--	1.38e-14	1.2e-06	Y	0.081	-0.0154576	1.167e-20	964207	6884042	MAD1L1	0	intronic	protein_coding	1.722		L100	Y	Pain intensity (PMID:38429522), Neuropathic pain in head and neck cancer (GCST005934)	N
76	p22.3	rs2644312	7	2841164	A	G	-0.00967075	0.00170891	0.2943	1.52e-08	--	9.41e-07	0.0023	N	0.2527	-0.00777967	1.29e-08	964207	6884042	GNA12	0	intronic	protein_coding	0.511		L100	N	Pain intensity (PMID:38429522), Neuropathic pain in head and neck cancer (GCST005934)	N
76	p22.3	rs68135341	7	3395033	T	C	0.0103492	0.00171913	0.2884	1.75e-09	++	0.00164562	5.4e-08	N	0.072	0.01048	1.317e-13	964207	6884042	SDK1	0	intronic	protein_coding	0.271	4	L100	N	Pain intensity (PMID:38429522), Neuropathic pain in head and neck cancer (GCST005934)	N
76	p22.3	rs35791987	7	3556548	C	G	-0.01309	0.00186441	0.2252	2.21e-12	--	8.48e-07	5.4e-07	N	0.7865	-0.0100116	9.88e-12	964207	6884042	SDK1	0	intronic	protein_coding	1.179	3a	L100	N	Pain intensity (PMID:38429522), Neuropathic pain in head and neck cancer (GCST005934)	N
76	p22.3	rs12532973	7	5353344	A	G	0.0147356	0.00246662	0.1123	2.32e-09	++	1.48e-05	3.9e-05	N	0.9816	0.01025	6.335e-07	964207	6884042	TNRC18	0	exonic	protein_coding	7.896	5	L101	Y	Smoking initiation (GCST90243968)	Y
76	p22.3	rs6979882	7	6693438	T	C	0.00971937	0.00174935	0.2724	2.76e-08	++	7.6e-05	9.5e-05	N	0.8986	0.00659525	3.474e-06	964207	6884042	ZNF316	0	ncRNA_exonic		18.9	5	L102	Y	Migraine or type 2 diabetes (GCST90244660)	N
77	p21.3	rs59700575	7	13691252	A	G	-0.00941812	0.00168451	0.6904	2.25e-08	--	0.000400205	1.1e-05	N	0.4399	-0.00764903	2.139e-08	13678712	13779259	AC011288.2	0	ncRNA_intronic	lincRNA	9.22	7	L103	Y	Smoking initiation (GCST90243968)	Y
78	p15.3	rs12668354	7	21531891	A	C	-0.0128615	0.00167555	0.6843	1.64e-14	--	4.75e-09	6.4e-07	Y	0.6951	-0.0117305	2.017e-17	21422023	21704788	SP4	0	intronic	protein_coding	0.699	7	L104	Y	Pain intensity (PMID:38429522), Multisite chronic pain (GCST008512; GCST012332)	N
79	p13	rs10275309	7	44327049	T	C	0.00960482	0.00172253	0.2865	2.46e-08	++	0.00116746	2.8e-06	N	0.2366	0.00811001	1.526e-08	44268785	44387014	CAMK2B	0	intronic	protein_coding	2.699	5	L105	Y	Osteoarthritis (GCST002155)	N
80	q11.22	rs116858843	7	71468501	T	C	-0.0265561	0.00458022	0.0298	6.7e-09	--	1.14e-06	0.001	N	0.3461	-0.0187323	7.369e-12	71202333	72408063	CALN1	0	intronic	protein_coding	5.143	7	L106	Y	Smoking cessation (GCST90243968)	Y
81	q21.11	rs1030015	7	78139581	T	G	0.00985849	0.0015589	0.5205	2.55e-10	++	1.07e-05	5.4e-06	N	0.7708	0.00913578	7.025e-13	78095593	78175993	MAGI2	0	intronic	protein_coding	0.823	7	L107	Y	Opioid use disorder (GCST90296425)	Y
82	q21.11	rs71117513	7	86261480	T	TA	-0.00908285	0.00163067	0.648	2.55e-08	--	0.00534283	2.4e-07	N	0.06442	-0.00908285	2.553e-08	85767754	86625044	GRM3	11749	intergenic	protein_coding	11.84		L108	Y	Psoriatic arthritis (GCST007043)	N
83	q21.3	rs7811016	7	95839843	A	T	0.0101516	0.00161111	0.3722	2.96e-10	++	0.00025744	1.1e-07	N	0.1744	0.0103559	3.491e-15	95648166	96068060	SLC25A13	0	intronic	protein_coding	2.319	6	L109	Y	Multisite chronic pain (GCST012332)	N
84	q31.1	rs1525205	7	108532718	T	C	0.0108028	0.00181254	0.2443	2.53e-09	++	3.9e-06	0.00015	N	0.6844	0.00700236	2.293e-06	108522559	109235327	FLJ00325	7670	intergenic		9.158		L110	Y	Smoking initiation (GCST90243968)	Y
84	q31.1	rs12537844	7	109117268	T	C	-0.0107839	0.00156311	0.542	5.23e-12	--	6.96e-09	9.1e-05	Y	0.2612	-0.00808264	2.456e-10	108522559	109235327	AC073071.1	44769	intergenic	lincRNA	1.015	7	L111	Y	Smoking initiation (GCST90243968)	Y
85	q31.1	rs1989903	7	114137940	A	G	-0.0160197	0.00158423	0.4086	4.86e-24	--	1.99e-18	5e-08	Y	0.04154	-0.0145858	1.296e-29	113741727	114579432	FOXP2	0	intronic	protein_coding	2.964		L112	Y	Pain intensity (PMID:38429522), Neck or shoulder pain (GCST010080), multisite chronic pain (GCST008512; GCST012332)	N
85	q31.1	rs2045293	7	114350102	T	C	0.0113552	0.00158416	0.4088	7.63e-13	++	7.5e-08	2.1e-06	N	0.8135	0.00960788	1.04e-13	113741727	114579432	FOXP2	16274	intergenic	protein_coding	4.595	6	L112	N	Pain intensity (PMID:38429522), Neck or shoulder pain (GCST010080), multisite chronic pain (GCST008512; GCST012332)	N
86	q32.1	rs73232968	7	127611358	A	G	-0.0114067	0.00176084	0.2668	9.29e-11	--	1.13e-11	0.025	Y	0.002494	-0.00941025	3.418e-10	127181328	127837247	SND1	0	intronic	protein_coding	2.962	6	L113	Y	Pain intensity (PMID:38429522), Smoking initiation (GCST007603)	N
87	q34	rs17621014	7	140155800	T	C	0.0154638	0.00259025	0.1005	2.38e-09	++	4.88e-12	0.17	Y	0.0001846	0.0143397	6.097e-11	140058376	140183018	MKRN1	0	intronic	protein_coding	13.84	4	L114	N	Pain intensity (PMID:38429522)	N
87	q34	rs112120514	7	140172554	A	ACT	-0.0154478	0.00177194	0.2616	2.83e-18	--	8.11e-14	1.7e-06	Y	0.1014	-0.0139843	6.702e-22	140058376	140183018	MKRN1	0	intronic	protein_coding	1.294		L114	Y	Pain intensity (PMID:38429522)	N
88	q36.1	rs743507	7	150707488	T	C	0.0103482	0.0018	0.7506	9e-09	++	5.49e-05	4.1e-05	N	0.8263	0.00628711	4.222e-05	150521813	150723212	NOS3	0	intronic	protein_coding	6.093		L115	Y	Multisite chronic pain (GCST012332)	N
89	p23.1	rs2929451	8	9085295	A	T	0.00937753	0.00155773	0.4934	1.74e-09	++	1.51e-09	0.018	Y	0.01543	0.00769845	1.474e-09	8093511	12303418	RP11-10A14.8	5227	intergenic	pseudogene	1.613	6	L116	N	Pain intensity (PMID:38429522), Osteoarthritis of the hip or knee (GCST007092), osteoarthritis (GCST007091, GCST007093)	N
89	p23.1	rs17149991	8	9271136	A	C	-0.0128039	0.00224986	0.8608	1.26e-08	--	8.04e-07	0.0022	N	0.2479	-0.00831216	3.208e-06	8093511	12303418	RP11-115J16.1:RP11-115J16.2	00:00:00	ncRNA_intronic		2.266	5	L116	N	Pain intensity (PMID:38429522), Osteoarthritis of the hip or knee (GCST007092), osteoarthritis (GCST007091, GCST007093)	N
89	p23.1	rs7015168	8	10772210	C	G	-0.0141145	0.00214311	0.473	4.51e-11	-?	4.51e-11		Y	1	-0.00943841	1.152e-09	8093511	12303418	XKR6	0	intronic	protein_coding	1.552		L116	Y	Pain intensity (PMID:38429522), Pain (pleiotropy) (GCST90104572), Osteoarthritis (GCST90134286)	N
89	p23.1	rs59028984	8	11036127	T	C	0.0166399	0.00278074	0.9142	2.18e-09	++	0.00030342	1e-06	N	0.2788	0.0166399	2.182e-09	8093511	12303418	XKR6	0	intronic	protein_coding	1.614	6	L116	N	Pain intensity (PMID:38429522), Osteoarthritis of the hip or knee (GCST007092)	N
89	p23.1	rs7461062	8	11831948	T	C	-0.0102397	0.0015588	0.4803	5.07e-11	--	3.18e-09	0.00099	Y	0.09607	-0.00905829	1.302e-12	8093511	12303418	DEFB136	0	intronic	protein_coding	2.607	3a	L116	N	Pain intensity (PMID:38429522), Osteoarthritis of the hip or knee (GCST007092)	N
90	q22.1	rs72674877	8	95592707	T	C	0.010756	0.00166967	0.6801	1.18e-10	++	1.82e-06	1.5e-05	N	0.9028	0.008296	4.727e-10	95353199	95724648	RP11-267M23.5	9635	intergenic	pseudogene	0.464	6	L117	Y	Pain intensity (PMID:38429522), Insomnia (GCST90131901)	N
91	q23.3	rs10108622	8	115562322	T	G	-0.0109821	0.00187185	0.7773	4.45e-09	--	8.93e-05	1.1e-05	N	0.6079	-0.00772058	4.536e-07	115012510	115913568	RP11-393K19.1	231181	intergenic		2.85	7	L118	Y	Smoking initiation (GCST90243968)	Y
92	q24.3	rs34308086	8	141673356	G	GA	-0.00867584	0.0015576	0.5008	2.55e-08	--	0.0016127	1.8e-06	N	0.1893	-0.00623438	9.873e-07	141556893	142687681	PTK2	0	intronic	protein_coding	1.926		L119	N	Multisite chronic pain (GCST012332)	N
92	q24.3	rs59918340	8	142232256	A	G	-0.0112241	0.00155977	0.5265	6.21e-13	--	1.4e-10	0.00023	Y	0.08564	-0.0103454	4.377e-16	141556893	142687681	SLC45A4	0	intronic	protein_coding	2.221	4	L119	Y	Pain intensity (PMID:38429522), Multisite chronic pain (GCST008512)	N
92	q24.3	rs11786084	8	142651709	A	G	0.0133197	0.00240862	0.3336	3.2e-08	?+		3.2e-08	Y	1	0.0103811	5.832e-10	141556893	142687681	AC138647.1	122871	intergenic	protein_coding	0.646	5	L120	Y	Pain intensity (PMID:38429522), Multisite chronic pain (GCST008512)	N
93	p23	rs10959640	9	11225906	T	C	0.00895285	0.00156136	0.4653	9.8e-09	++	0.00043416	3.7e-06	N	0.3394	0.00783178	8.463e-10	11016563	14224063	RP11-23D5.1	49407	intergenic	lincRNA	0.052	7	L121	Y	Smoking initiation (GCST007468)	Y
93	p23	rs12004755	9	14159091	A	G	0.0127141	0.00220807	0.1456	8.5e-09	++	6.68e-07	0.0018	N	0.2556	0.0102582	1.762e-08	11016563	14224063	NFIB	0	intronic	protein_coding	2.798	4	L122	Y	Migraine (GCST90102553)	N
94	p21.1	rs2656988	9	31295017	A	G	-0.00883605	0.00156529	0.5495	1.66e-08	--	1.42e-05	0.00029	N	0.7346	-0.00757203	2.819e-09	31119133	31384116	SLC25A6P2	40241	intergenic	pseudogene	1.807	7	L123	Y	Osteoarthritis (GCST90134288)	N
95	q21.2	rs10125844	9	80319889	A	G	0.00995032	0.00172091	0.7126	7.37e-09	++	0.000182157	8.2e-06	N	0.4968	0.00704673	4.695e-07	80279118	80908089	GNAQ	11113	intergenic		1.099	6	L124	Y	Smoking initiation (GCST90243968)	Y
96	q22.31	rs2895249	9	96365753	A	G	-0.0131671	0.00159795	0.3883	1.72e-16	--	6.91e-10	4.5e-08	Y	0.8037	-0.010698	2.134e-16	95943304	96605924	PHF2	0	intronic	protein_coding	2.332	7	L125	Y	Pain intensity (PMID:38429522), Multisite chronic pain (GCST012332), Osteoarthritis of the hip or knee (GCST90034536)	N
97	q33.1	rs6478241	9	119252629	A	G	0.0140348	0.00235919	0.3648	2.7e-09	?+		2.7e-09	Y	1	0.00700519	1.872e-05	119155568	122676273	ASTN2	0	intronic	protein_coding	3.07	5	L126	Y	Multisite chronic pain (GCST012332), Rheumatoid arthritis (GCST006048)	N
97	q33.1	rs4837504	9	120521428	A	G	-0.00918244	0.0015651	0.5489	4.44e-09	--	0.000164659	5.2e-06	N	0.4638	-0.00784006	8.494e-10	119155568	122676273	RP11-281A20.2	24297	intergenic	lincRNA	2.214	7	L127	Y	Rheumatoid arthritis (GCST006048)	N
97	q33.1	rs189022423	9	120909402	A	G	-0.0386294	0.0070376	0.0124	4.04e-08	--	4.92e-06	0.0016	N	0.4034	-0.0337836	2.98e-07	119155568	122676273	TPT1P9	63741	intergenic		2.985	6	L128	Y	Rheumatoid arthritis (GCST006048)	N
97	q33.1	rs1333907	9	122673388	A	T	-0.0106542	0.00158852	0.4018	1.99e-11	--	6.23e-11	0.0045	Y	0.01569	-0.0109246	5.072e-17	119155568	122676273	RP11-360A18.2	23942	intergenic	lincRNA	16.41	6	L129	Y	Pain intensity (PMID:38429522), Self-reported risk-taking behaviour (GCST006810), Adventurousness (GCST007324)	N
98	q33.3	rs588818	9	127821554	A	G	0.01264	0.00168063	0.6878	5.45e-14	++	2.41e-09	3.6e-06	Y	0.4715	0.0114268	1.856e-15	127594420	131133347	SCAI	0	intronic	protein_coding	8.477	7	L130	Y	Pain intensity (PMID:38429522), Osteoarthritis (hip) (GCST90034522)	N
98	q33.3	rs7849174	9	128483627	T	C	-0.00969522	0.00161023	0.3732	1.73e-09	--	2.06e-10	0.042	Y	0.003988	-0.00849245	1.563e-10	127594420	131133347	MAPKAP1	14113	intergenic	protein_coding	3.305	7	L130	N	Pain intensity (PMID:38429522), Osteoarthritis (hip) (GCST90034522)	N
98	q33.3	rs3003575	9	130987638	A	G	-0.0095983	0.00156299	0.5415	8.22e-10	--	3.25e-05	5.5e-06	N	0.6466	-0.00832036	7.338e-11	127594420	131133347	DNM1	0	intronic	protein_coding	2.814	2b	L131	Y	Smoking initiation (GCST90243968)	Y
99	q34.3	rs73581580	9	140251458	A	G	0.025956	0.0034397	0.1245	4.5e-14	?+		4.5e-14	Y	1	0.0189706	2.723e-19	139967824	140428156	EXD3	0	intronic	protein_coding	0.057	5	L132	Y	Multisite chronic pain (GCST012332)	N
100	p12.33	rs10764437	10	18648505	A	G	0.0103727	0.00155792	0.4896	2.77e-11	++	3.89e-13	0.045	Y	0.000433	0.00888391	3.597e-12	18563156	22299503	CACNB2	0	intronic	protein_coding	1.986	7	L133	Y	Pain intensity (PMID:38429522)	N
100	p12.33	rs4748715	10	21048806	T	C	0.0109843	0.00160613	0.622	7.96e-12	++	1.65e-07	1e-05	N	0.7077	0.00968394	3.875e-13	18563156	22299503	NEBL	20095	intergenic		0.163	6	L134	Y	Pain intensity (PMID:38429522), Multisite chronic pain (GCST008512; GCST012332)	N
100	p12.33	rs10828248	10	21824619	A	G	-0.0135679	0.00162958	0.647	8.35e-17	--	4.7e-11	2.5e-07	Y	0.4482	-0.0126348	4.033e-21	18563156	22299503	MLLT10	0	intronic	protein_coding	3.906	4	L135	Y	Pain intensity (PMID:38429522), Multisite chronic pain (GCST008512; GCST012332)	N
101	q22.2	rs12775558	10	75570868	A	G	0.00867234	0.0015837	0.5904	4.34e-08	++	7.27e-05	0.00016	N	0.9785	0.00674277	1.329e-07	75028460	75695724	NDST2	0	intronic	protein_coding	9.858	2b	L136	Y	Pain intensity (PMID:38429522), Osteoarthritis of the hip or knee (with total joint replacement) (GCST90034526)	N
102	q24.2	rs112213274	10	99784552	CCA	C	-0.0124689	0.00227452	0.4735	4.2e-08	?-		4.2e-08	Y	1			99694970	100027987	CRTAC1	0	intronic	protein_coding	8.718		L137	Y	Pain (pleiotropy) (GCST90104572)	N
103	q24.32	rs4918003	10	105044157	T	C	-0.00948798	0.0015719	0.4327	1.58e-09	--	9.53e-09	0.0067	Y	0.04976	-0.00675618	1.299e-07	104546467	107491895	INA	0	intronic	protein_coding	0.157	1b	L138	Y	Pain intensity (PMID:38429522), Multisite chronic pain (GCST008512; GCST012332)	N
103	q24.32	rs61867290	10	106537886	T	C	-0.0126487	0.00194626	0.2002	8.1e-11	--	8.58e-09	0.00076	Y	0.1344	-0.00947047	8.492e-10	104546467	107491895	SORCS3	0	intronic	protein_coding	1.722	6	L139	N	Pain intensity (PMID:38429522), Multisite chronic pain (GCST008512; GCST012332)	N
103	q24.32	rs12250380	10	106587950	A	G	0.013077	0.00157687	0.422	1.1e-16	++	3.43e-12	2.5e-06	Y	0.1785	0.0104993	9.636e-16	104546467	107491895	SORCS3	0	intronic	protein_coding	0.246	5	L139	Y	Pain intensity (PMID:38429522), Multisite chronic pain (GCST008512; GCST012332)	N
104	q26.3	rs56138741	10	134917355	A	G	0.0120411	0.00210952	0.1628	1.15e-08	++	7.12e-05	4e-05	N	0.7905	0.00778359	1.353e-06	134876496	135047809	GPR123	0	intronic	protein_coding	1.014	5	L140	N	PHF-tau measurement (GCST010340)	Y
104	q26.3	rs12776037	10	134972196	T	C	0.0111922	0.00175014	0.272	1.61e-10	++	0.000196893	7.7e-08	N	0.1744	0.00818912	7.982e-09	134876496	135047809	KNDC1	1754	intergenic		1.058	5	L140	Y	PHF-tau measurement (GCST010340)	Y
105	p15.2	rs11022753	11	13310854	T	C	0.0104046	0.0017638	0.7346	3.66e-09	++	2.39e-08	0.0074	Y	0.06039	0.00993833	4.083e-12	13230633	17418477	ARNTL	0	intronic	protein_coding	3.362	4	L141	Y	Pain intensity (PMID:38429522), Osteoarthritis of the hand (GCST90034527)	N
105	p15.2	rs7929530	11	16381813	A	C	0.0198611	0.00315807	0.1526	3.2e-10	?+		3.2e-10	Y	1	0.0147551	2.455e-10	13230633	17418477	SOX6	0	intronic	protein_coding	5.406	7	L142	Y	Pain intensity (PMID:38429522)	N
105	p15.2	rs757081	11	17351683	C	G	0.0097387	0.00165399	0.6682	3.92e-09	++	1.7e-07	0.0024	N	0.1687	0.00803911	2.552e-09	13230633	17418477	NUCB2	0	exonic	protein_coding	21.1	7	L143	Y	Pain intensity (PMID:38429522)	N
106	p12	rs79130449	11	43554650	A	C	0.0209366	0.00368732	0.9532	1.36e-08	++	0.000221125	1.3e-05	N	0.5218	0.0136326	1.291e-05	42811758	47326184	CTBP2P6	9835	intergenic		5.602	6	L144	Y	Multisite chronic pain (GCST012332)	N
106	p12	rs117837188	11	46327578	A	G	0.0189021	0.00339294	0.0558	2.53e-08	++	3.48e-07	0.0066	N	0.1292	0.0153744	2.19e-07	42811758	47326184	CREB3L1	0	intronic	protein_coding	0.091	7	L145	Y	Migraine (GCST90102553)	N
107	q12.3	rs5792269	11	62515553	G	GT	-0.0109251	0.00180193	0.2486	1.34e-09	--	6.76e-07	0.00036	N	0.4179	-0.0109251	1.34e-09	62316195	62697813	ZBTB3	237	downstream	protein_coding	1.967		L146	Y	Migraine (GCST90102553)	N
108	q13.5	rs10899274	11	76447337	T	C	0.00945326	0.00160035	0.6148	3.49e-09	++	0.000609815	6.5e-07	N	0.2036	0.00697638	1.033e-07	76421533	76511286	RP11-672A2.1	16684	intergenic		3.446	4	L147	Y	Knee osteoarthritis (GCST90271770)	N
109	q23.2	rs61687445	11	113438092	A	C	-0.0102533	0.00157211	0.4322	6.92e-11	--	5.32e-07	2.8e-05	N	0.6968	-0.00891533	9.368e-12	113378952	117175658	DRD2	91678	intergenic	protein_coding	20.9	7	L148	Y	Pain intensity (PMID:38429522), Back pain (GCST90245850), Pain (pleiotropy) (GCST90104572)	N
109	q23.2	rs12099024	11	115082142	A	G	-0.00895758	0.00156001	0.5278	9.33e-09	--	2.04e-06	0.00086	N	0.4057	-0.00713361	2.097e-08	113378952	117175658	CADM1	0	intronic	protein_coding	6.831	1f	L149	Y	Smoking initiation (GCST90243968)	Y
109	q23.2	rs236911	11	117085270	A	C	0.0136889	0.00236792	0.8766	7.42e-09	++	1.56e-06	0.00086	N	0.3854	0.0129752	7.302e-13	113378952	117175658	PCSK7	0	intronic	protein_coding	1.923	7	L150	Y	Smoking initiation (GCST90243968)	Y
110	q24.1	rs1622638	11	121800971	A	G	0.00884638	0.00159222	0.3963	2.76e-08	++	5.14e-06	0.0011	N	0.4526	0.00768808	3.39e-09	121772095	121832956	RNU6-256P	74091	intergenic	snRNA	22.3	4	L151	Y	Opioid use disorder (GCST90296425)	Y
111	p12.3	rs12309210	12	15388361	T	C	-0.010221	0.00166276	0.675	7.88e-10	--	5.38e-05	2.9e-06	N	0.5254	-0.0105225	1.405e-14	15308279	15568509	RERG	0	intronic	protein_coding	0.676	6	L152	Y	General pain factor (GCST90129461)	N
112	p12.3	rs6486925	12	19148654	A	G	-0.0122699	0.00206703	0.8287	2.93e-09	--	2.85e-08	0.0057	Y	0.07279	-0.00911693	1.117e-07	18875354	19557893	RPL7P6	93319	intergenic		0.28	7	L153	N	Pain intensity (PMID:38429522)	N
112	p12.3	rs954976	12	19314915	A	T	-0.0113921	0.00176485	0.2649	1.08e-10	--	9.99e-08	0.00017	N	0.3595	-0.00997379	4.532e-12	18875354	19557893	PLEKHA5	0	intronic	protein_coding	1.417	6	L153	Y	Pain intensity (PMID:38429522)	N
113	p12.1	rs9804988	12	23982559	T	C	0.0164915	0.00234922	0.1257	2.23e-12	++	9.51e-07	4.8e-07	N	0.762	0.0150995	4.917e-15	23784488	24118604	SOX5	0	intronic	protein_coding	0.412	7	L154	Y	Back pain (GCST007152)	N
114	q13.11	rs10467213	12	46720263	A	T	0.00883418	0.00159606	0.6091	3.11e-08	++	0.000131254	6e-05	N	0.7655	0.00757697	6.761e-09	46605239	50160662	SLC38A2	31708	intergenic	protein_coding	1.981	6	L155	Y	Rheumatoid arthritis (GCST90132222)	N
114	q13.11	rs60064985	12	49903593	CA	C	-0.0187205	0.00286904	0.0801	6.8e-11	--	2.4e-06	6.5e-06	N	0.9618	-0.0187205	6.798e-11	46605239	50160662	SPATS2	0	intronic	protein_coding	1.061		L156	Y	Smoking initiation (GCST007468)	Y
115	q13.2	rs2271194	12	56477694	A	T	-0.0105108	0.00157891	0.4181	2.8e-11	--	1.02e-05	5.1e-07	N	0.5294	-0.00834262	1.033e-10	56354272	56691600	ERBB3	0	intronic	protein_coding	0.43	5	L157	Y	Pain intensity (PMID:38429522), Migraine (GCST90102553, GCST011062, GCST001105)	N
116	q21.31	rs370604	12	83926427	T	C	-0.00984229	0.00156425	0.4539	3.14e-10	--	3.23e-06	2.3e-05	N	0.9114	-0.00806737	2.281e-10	83730697	84771127	RP11-384P14.1	128360	intergenic	lincRNA	2.725		L158	Y	Smoking initiation (GCST90243968)	Y
117	q21.33	rs4842707	12	90428341	A	G	0.0104269	0.0017836	0.2564	5.05e-09	++	2.18e-06	0.00047	N	0.4824	0.0074018	6.487e-07	90266631	90568752	RP11-654D12.2	45274	intergenic		0.084	7	L159	Y	Migraine (GCST90102553)	N
118	q23.3	rs7295213	12	107685309	A	G	-0.00891228	0.00157433	0.4273	1.51e-08	--	2.29e-05	0.00017	N	0.867	-0.00861871	2.312e-11	107548112	108629780	SETP7	19685	intergenic	pseudogene	1.84	7	L160	Y	Pain pleiotropy (GCST90104572)	N
118	q23.3	rs3764002	12	108618630	T	C	-0.0104513	0.00177773	0.259	4.13e-09	--	1.06e-05	9.7e-05	N	0.8545	-0.0104171	1.343e-13	107548112	108629780	WSCD2	0	exonic	protein_coding	28.1	7	L161	Y	Pain intensity (PMID:38429522), Knee osteoarthritis (GCST90034523)	N
119	q24.31	rs10847242	12	123079020	T	G	-0.00933685	0.0016098	0.3737	6.65e-09	--	4.94e-08	0.0076	Y	0.07236	-0.00735057	2.684e-08	122674758	123972878	KNTC1	0	intronic	protein_coding	0.067	5	L162	N	Pain intensity (PMID:38429522), Migraine (GCST90102553), Knee osteoarthritis (GCST006925, GCST007090, GCST90034523), Hip osteoarthritis (GCST002155, GCST007091), Osteoarthritis ( GCST007093)	N
119	q24.31	rs67624109	12	123824635	T	C	-0.0152719	0.00194224	0.2013	3.76e-15	--	2.99e-15	0.002	Y	0.001565	-0.012913	2.723e-16	122674758	123972878	SBNO1	0	intronic	protein_coding	1.449	6	L162	Y	Pain intensity (PMID:38429522), Migraine (GCST90102553), Knee osteoarthritis (GCST006925, GCST007090, GCST90034523), Hip osteoarthritis (GCST002155, GCST007091), Osteoarthritis ( GCST007093)	N
120	q14.3	rs2587366	13	53947732	T	C	-0.0107956	0.00157807	0.5803	7.84e-12	--	0.00132098	5.1e-11	Y	0.009932	-0.00976553	3.884e-14	53605235	60832322	AL450423.1	5640	intergenic	miRNA	18.26	7	L163	Y	Multisite chronic pain (GCST012332)	N
120	q14.3	rs33999860	13	56772960	CA	C	-0.010078	0.00162733	0.6448	5.9e-10	--	1.24e-09	0.0098	Y	0.02222	-0.00841197	4.592e-10	53605235	60832322	SPATA2P1	15546	intergenic	pseudogene	4.768		L164	Y	Pain intensity (PMID:38429522), Externalizing behaviour (ADHD, substance abuse, antisocial behavior) (GCST90061435)	N
120	q14.3	rs12866976	13	60332473	T	C	-0.0114768	0.00179521	0.2514	1.63e-10	--	1.3e-07	0.0002	N	0.3609	-0.0112061	1.063e-13	53605235	60832322	DIAPH3	0	intronic	protein_coding	0.364	6	L165	Y	Pain (FinnGen)	N
121	q21.32	rs1460655	13	66491156	A	G	-0.0128613	0.00220682	0.8542	5.6e-09	--	2.51e-06	0.00046	N	0.4975	-0.0103667	2.599e-09	66369264	66858592	LINC01052	38804	intergenic	lincRNA	1.664		L166	Y	Smoking initiation (GCST90243968)	Y
122	q34	rs9549670	13	112628416	T	C	0.00854633	0.00155926	0.5231	4.22e-08	++	0.000262322	3.8e-05	N	0.6204	0.00663799	1.878e-07	112574325	112735823	AL136302.1	65267	intergenic		5.63	5	L167	Y	Osteoarthritis (GCST001209)	N
123	q12	rs1957466	14	29497921	T	C	0.0114404	0.00199206	0.8117	9.31e-09	++	0.000347184	4.7e-06	N	0.3796	0.008355	1.221e-07	29275041	29675957	RP11-148E17.1	0	ncRNA_exonic		2.112	4	L168	Y	Pain pleiotropy (GCST90104572)	N
124	q13.3	rs34034928	14	37731252	G	GA	-0.00980728	0.00167274	0.3177	4.54e-09	--	2.05e-05	5.6e-05	N	0.9908	-0.0082826	1.958e-09	37448052	38218718	MIPOL1	0	intronic	protein_coding	0.655		L169	Y	Pain intensity (PMID:38429522)	N
125	q21.1	rs8009571	14	42145815	C	G	0.00921915	0.00158133	0.4137	5.54e-09	++	3.31e-05	4.2e-05	N	0.8926	0.00738339	1.395e-08	41932816	42697579	LRFN5	0	intronic	protein_coding	0.274	5	L170	Y	Migraine (GCST90102553)	N
126	q21.2	rs17681972	14	47243109	A	G	-0.0110647	0.00155776	0.5075	1.23e-12	--	1.03e-11	0.0017	Y	0.0173	-0.0102714	7.423e-16	46794666	47453632	MDGA2	65716	intergenic	protein_coding	4.825	7	L171	Y	Pain intensity (PMID:38429522)	N
127	q24.1	rs12431732	14	69350528	T	G	0.0197051	0.00334269	0.0576	3.74e-09	++	5.55e-06	0.00016	N	0.7131	0.0147863	1.134e-07	69174593	69791308	ACTN1	0	intronic		0.547	7	L172	N	Pain intensity (PMID:38429522), Osteoporosis (GCST90018887)	N
127	q24.1	rs4902704	14	69703588	C	G	0.0106998	0.00159626	0.6094	2.04e-11	++	1.09e-09	0.00095	Y	0.07593	0.0101304	7.887e-15	69174593	69791308	EXD2	0	intronic	protein_coding	1.314	5	L172	Y	Pain intensity (PMID:38429522), Osteoporosis (GCST90018887)	N
128	q32.31	rs3803286	14	103246470	A	G	0.0110651	0.00164438	0.3397	1.71e-11	++	6.47e-08	4.6e-05	N	0.4589	0.00994251	1.387e-13	103113552	104537680	TRAF3	0	intronic	protein_coding	11.87		L173	Y	Pain intensity (PMID:38429522), Multisite chronic pain (GCST012332)	N
128	q32.31	rs12879501	14	104272634	T	G	0.00903425	0.00158496	0.4075	1.2e-08	++	0.000797972	2e-06	N	0.246	0.00600165	3.323e-06	103113552	104537680	PPP1R13B	0	intronic	protein_coding	1.333	5	L174	Y	Pain intensity (PMID:38429522), Multisite chronic pain (GCST012332)	N
129	q21.1	rs1915159	15	46406722	A	G	-0.00913483	0.00156204	0.4623	4.97e-09	--	2.6e-07	0.0022	N	0.1924	-0.00782407	8.262e-10	46300580	46618157	RP11-315O8.1	14131	intergenic	pseudogene	1.768		L175	Y	Pain intensity (PMID:38429522), Opioid use disorder (MTAG) (GCST90134625)	N
130	q24.1	rs896591	15	74150392	A	G	0.0135665	0.00199653	0.1872	1.09e-11	++	1.43e-08	0.0001	Y	0.2907	0.00959833	3.81e-09	74080589	76121530	RP11-24D15.1	12898	intergenic	antisense	0.301		L176	Y	Pain intensity (PMID:38429522), Multisite chronic pain (GCST012332)	N
130	q24.1	rs4886860	15	74340336	C	G	-0.0115825	0.00185202	0.7705	4e-10	--	2.33e-06	4e-05	N	0.8032	-0.00731022	5.794e-07	74080589	76121530	PML	182	downstream		2.778	4	L176	N	Pain intensity (PMID:38429522), Multisite chronic pain (GCST012332)	N
130	q24.1	rs4886417	15	75330159	T	G	-0.00922914	0.00156294	0.5413	3.52e-09	--	0.00260333	6.1e-08	N	0.06052	-0.00584553	5.602e-06	74080589	76121530	PPCDC	0	intronic	protein_coding	1.881	4	L176	N	Pain intensity (PMID:38429522), Multisite chronic pain (GCST012332)	N
130	q24.1	rs76621678	15	75844953	T	C	0.0115184	0.00208063	0.1685	3.1e-08	++	5.48e-05	0.00015	N	0.9944	0.010038	3.408e-09	74080589	76121530	PTPN9	00:00:00	ncRNA_intronic	protein_coding	0.074	4	L176	N	Pain intensity (PMID:38429522), Multisite chronic pain (GCST012332)	N
131	q26.1	rs6496748	15	91546936	A	G	-0.0118532	0.00159338	0.6054	1.02e-13	--	6.3e-05	4.1e-11	Y	0.0394	-0.0104064	1.047e-15	91444476	91581269	VPS33B	0	intronic	protein_coding	3.604	7	L177	Y	Pain intensity (PMID:38429522), Multisite chronic pain (GCST012332)	N
132	p12.1	rs62032342	16	25338151	A	G	-0.0136375	0.0021352	0.842	1.69e-10	--	3.47e-08	0.00054	Y	0.2062	-0.0142409	1.45e-15	25243180	25527156	ZKSCAN2	68898	intergenic	protein_coding	2.919	7	L178	Y	Pain intensity (PMID:38429522)	N
133	p11.2	rs4889603	16	30982225	A	G	0.0102019	0.00159256	0.6042	1.49e-10	++	3.87e-09	0.002	Y	0.07348	0.00690726	9.676e-08	30517718	31378235	SETD1A	0	intronic	protein_coding	0.156	1f	L179	Y	Pain intensity (PMID:38429522)	N
134	q12.1	rs4785295	16	49466576	A	G	0.00996367	0.00174007	0.7229	1.03e-08	++	3.31e-05	8e-05	N	0.9808	0.00685517	2.134e-06	49391164	49653496	RP11-189E14.5	10244	intergenic		6.544	6	L180	Y	Pain intensity (PMID:38429522)	N
134	q12.1	rs11642983	16	49597423	T	G	-0.0114392	0.00208707	0.8328	4.23e-08	--	6.16e-06	0.0014	N	0.4384	-0.0114368	1.701e-11	49391164	49653496	ZNF423	0	intronic	protein_coding	1.393	5	L180	N	Pain intensity (PMID:38429522)	N
135	q21	rs2012044	16	60595531	T	G	0.00877422	0.00159271	0.3956	3.61e-08	++	0.00084332	7.1e-06	N	0.3274	0.00836834	1.158e-10	60544428	60745208	RP11-354I13.1	38376	intergenic	lincRNA	0.447		L181	Y	Smoking cessation (GCST90243968)	Y
136	q21	rs548213	16	65964522	T	C	-0.0101762	0.0015579	0.51	6.5e-11	--	9.8e-07	1.5e-05	N	0.8363	-0.00665614	1.672e-07	65913331	66074325	RP11-356O24.1	7569	intergenic		1.532	6	L182	Y	Insomnia (GCST90131901)	Y
137	q22.2	rs60783588	16	71974745	CT	C	0.0104239	0.00177639	0.2596	4.4e-09	++	0.00036526	1.8e-06	N	0.3025	0.0104239	4.404e-09	71437689	72260693	PKD1L3	0	ncRNA_intronic	processed_transcript	0.509		L183	Y	Neck pain (GCST010080)	N
138	q23.1	rs682081	16	77103050	T	C	-0.0106648	0.00157483	0.4262	1.27e-11	--	1.69e-05	1.1e-07	N	0.3607	-0.00906318	1.498e-12	77027006	77335405	MON1B	121681	intergenic	protein_coding	0.042	5	L184	Y	Multisite chronic pain (GCST012332)	N
138	q23.1	rs1974890	16	77269673	T	C	0.0114605	0.00204142	0.8232	1.98e-08	++	5.7e-06	0.00075	N	0.5104	0.00841318	2.022e-07	77027006	77335405	RP11-538I12.2:RP11-538I12.3	00:00:00	ncRNA_intronic		2.481		L184	N	Multisite chronic pain (GCST012332)	N
139	q24.3	rs7190662	16	88726280	A	C	-0.0118317	0.00216341	0.153	4.52e-08	--	0.000590356	1.5e-05	N	0.427	-0.00978377	1.88e-08	88706330	90149365	MVD	0	intronic	protein_coding	0.168	6	L185	N	Pain intensity (PMID:38429522), Osteoarthritis (GCST007093)	N
139	q24.3	rs164749	16	89708224	T	G	-0.0107794	0.00156723	0.5554	6.07e-12	--	1.77e-08	5.1e-05	Y	0.3605	-0.00886093	4.928e-12	88706330	90149365	CHMP1A	2614	intergenic	protein_coding	1.21		L185	Y	Pain intensity (PMID:38429522), Osteoarthritis (GCST007093)	N
139	q24.3	rs3212345	16	89982272	T	C	0.00923905	0.00157798	0.5801	4.77e-09	++	4.56e-06	0.00024	N	0.6379	0.00814417	1.874e-10	88706330	90149365	MC1R	00:00:00	ncRNA_intronic	protein_coding	1.009	4	L185	N	Pain intensity (PMID:38429522), Osteoarthritis (GCST007093)	N
140	q11.2	rs28494843	17	29010238	A	T	-0.00928128	0.0016726	0.3178	2.87e-08	--	4e-05	0.00019	N	0.9198	-0.00768588	1.941e-08	28703881	29255323	AC005562.1	10430	intergenic	processed_transcript	0.053	6	L186	Y	Pain pleiotropy (GCST90104572)	N
141	q21.31	rs7215357	17	43157329	A	G	0.0100035	0.0015771	0.4216	2.25e-10	++	0.00149958	4.1e-09	Y	0.0355	0.00681738	1.083e-07	43064174	43334978	NMT1	0	intronic	protein_coding	5.326	7	L187	Y	Multisite chronic pain (GCST012332)	N
142	q21.33	rs967823	17	50317276	A	G	-0.013742	0.00159587	0.6089	7.21e-18	--	6.01e-08	1e-11	Y	0.2157	-0.0104623	1.286e-15	50188905	50342947	snoZ178	13568	intergenic	snoRNA	2.051	7	L188	Y	Multisite chronic pain (GCST012332)	N
143	q24.2	rs113985803	17	65989971	A	G	-0.0138106	0.00186177	0.7739	1.19e-13	--	1.01e-07	2.4e-07	N	0.9139	-0.0144942	3.654e-22	65762341	66203119	RP11-855A2.5	24	upstream	lincRNA	9.38	4	L189	Y	Pain intensity (PMID:38429522)	N
144	q25.1	rs62086015	17	74808719	T	C	0.016899	0.00280156	0.0844	1.62e-09	++	4.91e-06	7.9e-05	N	0.7949	0.016899	1.618e-09	74606193	74853404	CTD-2246P4.1	6683	intergenic	lincRNA	0.641	5	L190	Y	Smoking initiation (GCST90243968)	Y
145	q12.2	rs12967741	18	35168263	A	G	0.00953252	0.001622	0.3605	4.17e-09	++	4.14e-06	0.00023	N	0.6338	0.00934132	4.03e-12	35086406	38347805	CELF4	22262	intergenic	protein_coding	5.498	6	L191	Y	Smoking initiation (GCST90243968)	Y
145	q12.2	rs9957031	18	38189902	A	G	-0.00883816	0.00161398	0.631	4.36e-08	--	6.48e-05	0.00018	N	0.9896	-0.00564522	1.698e-05	35086406	38347805	RNU7-145P	137055	intergenic		2.894	7	L192	Y	Pain (FinnGen)	N
146	q21.2	rs12961437	18	50106099	T	G	0.0124946	0.00214463	0.8437	5.68e-09	++	2.25e-05	6.4e-05	N	0.9974	0.0119582	1.044e-11	49948131	53577939	DCC	0	intronic	protein_coding	4.019	7	L193	N	Pain intensity (PMID:38429522), Insomnia (GCST90131901)	N
146	q21.2	rs2043187	18	50394405	A	G	-0.0137803	0.00227585	0.4684	1.4e-09	?-		1.4e-09	Y	1			49948131	53577939	DCC	0	intronic	protein_coding	1.653		L193	N	Pain intensity (PMID:38429522), Insomnia (GCST90131901)	N
146	q21.2	rs17488580	18	50757261	T	G	0.0126789	0.00157718	0.4214	9.05e-16	++	4.55e-07	1.9e-10	Y	0.2393	0.0131691	1.379e-24	49948131	53577939	DCC	0	intronic	protein_coding	0.053	6	L193	Y	Pain intensity (PMID:38429522), Multisite chronic pain (GCST012332)	N
146	q21.2	rs34704187	18	52800390	A	G	-0.00990516	0.001655	0.669	2.16e-09	--	4.02e-09	0.013	Y	0.02596	-0.00747539	3.724e-08	49948131	53577939	CTD-2171N6.1	8852	intergenic	lincRNA	3.911	7	L194	N	Pain intensity (PMID:38429522), Multisite chronic pain (GCST008512; GCST012332), Chronic back pain (GCST007152)	N
146	q21.2	rs7243387	18	52882650	A	G	0.0280895	0.00353016	0.0513	1.77e-15	++	1.1e-13	0.0002	Y	0.01698	0.0223398	3.303e-12	49948131	53577939	TCF4	6911	intergenic	protein_coding	7.795	5	L194	Y	Pain intensity (PMID:38429522), Multisite chronic pain (GCST008512; GCST012332), Chronic back pain (GCST007152)	N
146	q21.2	rs41437147	18	52926576	T	C	-0.0151756	0.00263145	0.903	8.06e-09	--	7.41e-07	0.0016	N	0.2723	-0.0118058	4.697e-07	49948131	53577939	TCF4	0	intronic	protein_coding	3.167	6	L195	Y	Pain intensity (PMID:38429522), Multisite chronic pain (GCST008512; GCST012332), Chronic back pain (GCST007152)	N
146	q21.2	rs596668	18	53264343	A	G	-0.0180823	0.00220866	0.1455	2.67e-16	--	1.25e-10	3.2e-07	Y	0.4892	-0.013101	9.481e-13	49948131	53577939	TCF4	0	intronic	protein_coding	2.972	5	L196	Y	Pain intensity (PMID:38429522), Multisite chronic pain (GCST008512; GCST012332), Chronic back pain (GCST007152)	N
147	q23	rs151286028	18	77567763	A	G	0.013694	0.00193582	0.2031	1.51e-12	++	1.38e-10	0.00046	Y	0.06403	0.013694	1.506e-12	77406443	77934588	RP11-154H12.3	0	ncRNA_intronic	lincRNA	4.133	7	L197	Y	Pain intensity (PMID:38429522), Opioid sensitivity (GCST002235)	N
148	p13.2	rs12974306	19	10830281	T	G	-0.00900566	0.00155888	0.4797	7.62e-09	--	3.79e-05	5.1e-05	N	0.902	-0.00648149	3.561e-07	10724002	11185014	DNM2	0	intronic	protein_coding	5.713	4	L198	Y	Chronic musculoskeletal pain (GCST90245880)	N
149	p13.11	rs2023878	19	18834124	T	C	-0.0109588	0.00199288	0.1881	3.82e-08	--	1.14e-06	0.0043	N	0.2083	-0.0091946	3.458e-09	18638405	19800467	CRTC1	0	intronic	protein_coding	0.15	5	L199	Y	Migraine (GCST90102553)	N
149	p13.11	rs35824797	19	19456264	T	C	0.0165888	0.00293711	0.0761	1.63e-08	++	0.00583201	1.1e-07	N	0.04842	0.0121263	1.149e-06	18638405	19800467	MAU2	0	intronic	protein_coding	0.853	4	L200	Y	Migraine (GCST90102553)	N
150	q13.12	rs367817327	19	37476422	G	GT	0.00888373	0.0016226	0.3599	4.38e-08	++	4.63e-08	0.029	Y	0.0309	0.00888373	4.379e-08	36654931	38474060	ZNF568	0	intronic	protein_coding	0.495		L201	Y	Pain intensity (PMID:38429522)	N
151	q13.32	rs10402271	19	45329214	T	G	0.00944574	0.0016668	0.678	1.45e-08	++	8.29e-06	0.00041	N	0.6278	0.00841868	3.224e-10	45232161	45653883	BCAM	4540	intergenic	protein_coding	1.611	5	L202	N	Pain intensity (PMID:38429522), Osteoarthritis of the hand (GCST90034527)	N
151	q13.32	rs429358	19	45411941	T	C	0.0163637	0.00219499	0.8523	8.98e-14	++	2.54e-11	0.00015	Y	0.06947	0.0153218	1.302e-18	45232161	45653883	APOE	0	exonic	protein_coding	12.64	5	L202	Y	Pain intensity (PMID:38429522), Osteoarthritis of the hand (GCST90034527)	N
151	q13.32	rs7412	19	45412079	T	C	0.0161007	0.0028593	0.0807	1.79e-08	++	5.02e-07	0.004	N	0.1766	0.0132339	8.154e-08	45232161	45653883	APOE	0	exonic	protein_coding	25.1	4	L202	N	Pain intensity (PMID:38429522), Osteoarthritis of the hand (GCST90034527)	N
152	q13.33	rs145838789	19	49953662	T	TTTG	-0.00995723	0.0016262	0.3563	9.19e-10	--	1.53e-06	0.00013	N	0.609	-0.00668273	7.58e-07	49942568	50055903	PIH1D1	0	intronic	protein_coding	4.256		L203	Y	Smoking initiation (GCST90243968)	Y
153	p11.23	rs2424248	20	19650324	A	G	-0.0216405	0.00342684	0.1256	2.7e-10	?-		2.7e-10	Y	1	-0.0151158	1.217e-11	19575017	21640407	SLC24A3	0	intronic	protein_coding	0.461	7	L204	Y	Multisite chronic pain (GCST012332)	N
153	p11.23	rs33994170	20	21142124	CACCGTGCCCGGCT	C	0.00959015	0.00165262	0.3329	6.51e-09	++	4.28e-06	0.00034	N	0.5857	0.00707627	1.938e-07	19575017	21640407	PLK1S1:RP5-872K7.7:RP4-777D9.2	00:00:00	ncRNA_intronic		0.925		L205	Y	Pain intensity (PMID:38429522)	N
154	q11.21	rs6119267	20	31163914	C	G	-0.0106764	0.001675	0.6839	1.84e-10	--	2.54e-05	1.4e-06	N	0.5327	-0.00976177	2.357e-13	30689924	31400673	C20orf112	0	intronic	protein_coding	0.498	5	L206	Y	Migraine (GCST003720)	N
155	q12	rs1006749	20	41716653	A	G	-0.00883951	0.00155845	0.5165	1.41e-08	--	8.01e-05	4.4e-05	N	0.788	-0.0058766	3.949e-06	41668007	41753494	PTPRT	0	intronic	protein_coding	0.178		L207	Y	Smoking initiation (GCST90243968)	Y
156	q13.33	rs2738774	20	62269338	A	G	-0.00937873	0.00166585	0.3227	1.8e-08	--	2.96e-08	0.02	Y	0.03497	-0.00866446	1.583e-10	62018289	62908382	STMN3	1722	intergenic	protein_coding	1.491	7	L208	N	Pain intensity (PMID:38429522)	N
156	q13.33	rs6089988	20	62405960	T	C	-0.0095418	0.00157092	0.435	1.25e-09	--	6.49e-08	0.0018	N	0.1514	-0.00746142	6.029e-09	62018289	62908382	ZBTB46	0	intronic	protein_coding	1.955	5	L208	N	Pain intensity (PMID:38429522)	N
156	q13.33	rs66486049	20	62426150	C	G	-0.0215011	0.00309145	0.0681	3.52e-12	--	2.22e-08	2.6e-05	Y	0.4386	-0.0193107	3.331e-14	62018289	62908382	ZBTB46	0	intronic	protein_coding	3.208	4	L208	Y	Pain intensity (PMID:38429522)	N
156	q13.33	rs3003138	20	62831503	A	G	-0.010405	0.00189699	0.7854	4.12e-08	--	1.26e-05	0.00077	N	0.5842	-0.00953758	5.644e-10	62018289	62908382	MYT1	0	intronic	protein_coding	4.533	5	L208	N	Pain intensity (PMID:38429522)	N
157	q22.3	rs8129315	21	46498863	A	G	-0.00924943	0.00160441	0.3801	8.16e-09	--	2.6e-06	0.00063	N	0.4622	-0.00757236	7.456e-09	46485406	46720912	ADARB1	0	intronic	protein_coding	11.98	4	L209	Y	Pain intensity (PMID:38429522)	N
158	q12.2	rs7286320	22	31763724	A	G	0.0257921	0.00382219	0.9566	1.5e-11	++	3.4e-06	9.1e-07	N	0.6978	0.0147977	1.781e-07	31091305	32512070	AC005003.1	19053	intergenic		1.421	5	L210	Y	Smoking initiation (GCST90243968)	Y
159	q13.2	rs5751245	22	42620940	T	C	0.00967772	0.00170773	0.705	1.45e-08	++	3.86e-05	9.8e-05	N	0.9898	0.00693531	3.052e-06	41624461	42859142	TCF20	0	intronic	protein_coding	1.088	5	L211	N	Pain intensity (PMID:38429522), Osteoarthritis (GCST007093)	N
159	q13.2	rs1041878	22	42705394	T	C	-0.00909047	0.00155846	0.5166	5.46e-09	--	0.000939706	5.9e-07	N	0.1717	-0.00684924	7.382e-08	41624461	42859142	TCF20	0	intronic	protein_coding	2.393	2b	L211	Y	Pain intensity (PMID:38429522), Osteoarthritis (GCST007093)	N
160		rs195035	23	85528423	A	C	0.0131591	0.0021801	0.5934	1.58e-09	+?	1.58e-09		Y	1	0.00846877	5.23e-08	85402575	85890412	DACH2	0	intronic	protein_coding	3.048	7	L212	Y	Pain intensity (PMID:38429522)	N

## Sheet: ST6
Supplementary Table 5: Region definition for fine-mapping analyses
GenomicLocus	Genomic_cord	indexSNP	CHR	start	end	indexSNPs_in_region	indexGenes_in_region
1	p36.23	rs12140566	1	8375842	8980238	rs12140566	RERE
2	p36.13	rs78695089	1	19240526	19769930	rs78695089	UBR4
3	p35.2	rs12739999	1	32076061	32256590	rs12739999	BAI2
4	p34.3	rs17264866	1	37082983	46865671	rs4147222, rs531785, rs17264866, rs11316275, rs4660830, rs3014237	RP4-614N24.1, ACTN4P2, PPIEL, HIVEP3, HECTD3, CCDC17
5	p33	rs6676515	1	50698760	51837195	rs6676515	HMGB1P45
6	p31.3	rs577841	1	65698179	65869163	rs577841	DNAJC6
7	p31.1	rs34361149	1	72519040	73298749	rs34361149	NEGR1
8	p31.1	rs71658797	1	77557339	78623626	rs71658797	AK5
9	p22.2	rs17130426	1	88629880	88881800	rs17130426	CTA-21C21.1
10	p21.3	rs6658412	1	98012711	98562260	rs6658412	DPYD
11	p21.1	rs12722976	1	102902818	103757081	rs12722976	COL11A1
12	p13.3	rs12033257	1	109825591	112347256	rs569670, rs12033257	SYPL2, KCND3
13	p12	rs1289948	1	117812481	118098984	rs1289882, rs1289948	RP11-188D8.1, MAN1A2
14	q21.2	rs60709164	1	149673166	156598920	rs115815732, rs60709164, rs9660679, rs12136718	RPRD2, LINC00568, S100A16, RP11-98G7.1
15	q24.1	rs686610	1	166515192	169086221	rs11576904, rs686610, rs1200136	RP4-782G3.1, AL049798.1, ATP1B1
16	q25.1	rs7536102	1	173471890	176895381	rs7536102, rs12138378	RABGAP1L, PAPPA2
17	q31.1	rs11332270	1	190494599	191808947	rs12121218, rs11332270	HNRNPA1P46, RP11-309H21.2
18	q31.3	rs12561959	1	198030154	199119573	rs12561959, rs12137224	NEK7, MIR181A1HG
19	q32.2	rs4328122	1	208638645	210958191	rs7540932, rs4328122	RP11-565N2.1, HHAT
20	q32.3	rs12124666	1	214424307	214662788	rs12124666	SMYD2
21	q42.13	rs6666360	1	229554924	230150116	rs6666360	RP11-108F13.2
22	q43	rs12032174	1	237834701	237912733	rs12032174	RYR2
23	q43	rs3897821	1	243098453	245479650	rs3897821, rs35570502, rs6428906	SDCCAG8, AKT3, KIF26B
24	p24.3	rs13012094	2	16575908	16782979	rs13012094	AC010880.1
25	p24.1	rs4416248	2	22414978	22722766	rs4416248	AC068490.2
26	p23.3	rs6705514	2	26937669	28293299	rs6705514, rs72810784	AC013472.4:MAPRE3:AC013472.3, AC013403.13
27	p23.1	rs56229323	2	31588577	32861555	rs56229323	SPAST
28	p16.3	rs76376207	2	50884338	53391441	rs76376207, rs72807818, rs1376569	NRXN1, AC007682.1, AC010967.2
29	p16.1	rs359258	2	59312947	61994601	rs13018470, rs2540094, rs359258, rs3087898	RP11-444A22.1:AC007131.2, RP11-444A22.1:AC007131.2, AC007381.3, XPO1
30	p12	rs114089087	2	80503573	84014885	rs4528777, rs114089087, rs13412678	CTNNA2, AC098817.5, AC098817.5
31	q11.2	rs4850917	2	100202482	100543061	rs4850917	AFF3
32	q12.1	rs264957	2	103703338	107701621	rs10204051, rs264957, rs10170477, rs2906605	AC073987.1, AC018880.2, AHCYP3, AC005040.3
33	q22.1	rs28396876	2	138698117	144519082	rs1187143, rs17651262, rs201316997, rs10187901, rs13001716, rs16822399, rs13428598, rs28396876	HNMT, NXPH2, RN7SKP286, AC078851.2, LRP1B, ARHGAP15:AC096558.1:RP11-570L15.2, ARHGAP15:RP11-570L15.2, ARHGAP15:RP11-434H14.1
34	q24.2	rs35698743	2	160257558	164449314	rs35698743, rs6710938, rs7421396	BAZ2B, RBMS1, FIGN
35	q31.1	rs10182067	2	171570488	172052632	rs10182067	AC007405.4
36	q33.3	rs55772859	2	206430393	212344135	rs114354942, rs142895582, rs55772859, rs57402142, rs112314380, rs6435622	INO80D, ADAM23, AC007879.1, AC079767.3, CPS1, ERBB4
37	q35	rs2280039	2	220339100	222981144	rs2280039, rs17315907	AC053503.11, AC009302.4
38	p26.3	rs75120399	3	2231987	2422321	rs75120399	CNTN4
39	p24.3	rs62237509	3	18609478	20754619	rs4635727, rs62237509	AC144521.1, RNU6-815P
40	p24.1	rs6551129	3	26560818	29807487	rs6551129, rs7638850	LRRC3B, RBMS3
40	p22.1	rs6551129	3	43202378	51287152	rs6551129, rs7638850	LRRC3B, RBMS3
41	p22.1	rs2271961	3	43202378	51287152	rs3733156, rs3804580, rs143861937, rs9586, rs115435316, rs73077107, rs2271961, rs150628303, rs142344547, rs34118560, rs4547694	ABHD5, KIF15, PLXNB1, KLHDC8B, DAG1, BSN, TRAIP, MON1A, MON1A, SEMA3F, U73166.2
42	p14.3	rs13071861	3	57676428	58556841	rs13071861	PXK
43	p14.1	rs5849952	3	67587445	78633484	rs6780736, rs1032376, rs5849952, rs12487457, rs1696286, rs11710505, rs6549671, rs62268946, rs3071072, rs5850333, rs4563376	RP11-81N13.1, FAM19A1, RP11-231I13.2, FOXP1, RP11-154H23.3, PDZRN3, NIPA2P2, ROBO2, ROBO2, ROBO2, MRPS17P3
44	q13.12	rs638293	3	107152358	107551521	rs638293	BBX
45	q13.31	rs9837485	3	114018053	114131674	rs9837485	ZBTB20:ZBTB20-AS1
46	q13.32	rs6438417	3	117366248	117969134	rs6438417, rs7618118	LSAMP:RP11-384F7.2, RP11-384F7.1
47	q22.2	rs9852075	3	135468347	137771152	rs9852075, rs9835571, rs4411833	PCCB, RP11-731C17.1, HSPA8P9
48	q26.31	rs556464	3	173019407	173130573	rs556464	NLGN1
49	q26.33	rs12696498	3	182446674	182831612	rs12696498	ATP11B
50	q29	rs145646459	3	196716738	197050392	rs145646459	DLG1
51	p16.3	rs1475974	4	1000138	3448228	rs13118508, rs13131466, rs1475974, rs2298971, rs73193346	TMED11P, TACC3, NOP14-AS1:NOP14, HTT, RGS12
52	p15.2	rs34811474	4	25111387	28873007	rs34811474, rs1024120	ANAPC4, RP11-180C1.1
53	p15.1	rs66944385	4	33642313	34493677	rs66944385	RP11-548L20.1
54	p14	rs13102095	4	38537708	38900397	rs13102095	RP11-617D20.1
55	q12	rs12505880	4	56046659	56544248	rs12505880	TMEM165:CLOCK
56	q13.1	rs55776420	4	62467185	63371512	rs1376310, rs55776420, rs13122283	LPHN3, LPHN3, RP11-84A1.3
57	q13.2	rs17087844	4	67041359	68058681	rs62305487, rs17087844	RP11-25H12.1, RNU6-699P
58	q21.21	rs71662898	4	81073276	81167372	rs71662898	PRDM8
59	q24	rs13107325	4	102321252	104069822	rs13107325	SLC39A8
60	q25	rs3934797	4	112167666	112516337	rs3934797	RP11-255I10.1
61	q28.2	rs72516830	4	130127544	130366552	rs72516830	RP11-419L4.1
62	q31.1	rs12505942	4	140725423	140977925	rs34236292, rs12505942	MAML3, MAML3
63	q32.1	rs1354252	4	160396606	160604028	rs1354252	U3
64	p15.31	rs17813430	5	7187119	7447405	rs17813430	ADCY2
65	p15.2	rs17239989	5	12778508	13365841	rs17239989	RP11-419C19.2
66	p13.3	rs56070621	5	30567499	30914671	rs56070621	RPL19P11
67	p12	rs145678215	5	44595088	46115369	rs145678215	RP11-357F12.1
68	q11.2	rs62359143	5	57092821	57338413	rs62359143	RP11-478P10.1
69	q14.3	rs112161672	5	92144478	94253296	rs1027430, rs112161672, rs42756	CTD-2091N23.1, FAM172A, MCTP1
70	q21.2	rs34073570	5	103044989	104996076	rs34073570	RP11-6N13.1
71	q21.3	rs10065099	5	108652105	109231379	rs10065099	MAN2A1
72	q22.3	rs41236	5	113393781	113833017	rs41236	KCNN2
73	q23.1	rs2122194	5	119873621	120477398	rs1122319, rs2122194	PRR16, CTD-2334D19.1
74	q31.1	rs35096828	5	133793417	134306784	rs35096828	JADE2
75	q31.3	rs246039	5	139729152	141337126	rs246039, rs9324858	PCDHA1:PCDHA2:PCDHA3:PCDHA4:PCDHA5:PCDHA6:PCDHA7:PCDHA8:PCDHA9:PCDHA10:PCDHA11:PCDHA12:PCDHA13:PCDHAC1, PCDH1
76	q33.2	rs2963998	5	153053621	153483653	rs2963998	GRIA1
77	q34	rs62381583	5	160571458	161234805	rs1946247, rs62381583	GABRB2, GABRB2
78	q34	rs34772405	5	167398432	170894847	rs139399164, rs150457448, rs34772405	TENM2, RANBP17, NPM1
79	q35.2	rs1966265	5	176328196	176772737	rs1966265	FGFR4
80	p24.1	rs12202891	6	11913828	13124594	rs62395444, rs12202891, rs1953088	RP11-456H18.1, PHACTR1, PHACTR1
81	p22.3	rs34292681	6	16921776	17073209	rs34292681	STMND1
82	p22.2	rs2113864070	6	25357564	29612837	rs36085954, rs2237235, rs12201477, rs2113864070, rs6456886, rs3131857	RNU6-1259P, BTN2A2, POM121L2, RSL24D1P1, OR2W1, SUMO2P1
83	p21.32	rs9296130	6	33200578	36608267	rs9278029, rs3818528, rs9469599, rs11752353, rs12202516, rs9296130, rs33959228, rs56077076	LYPLA2P1, ITPR3, MLN, MLN, PACSIN1, UHRF1BP1, ZNF76, PXT1
84	p21.1	rs11444709	6	42878706	43364494	rs11444709, rs11967948	PTK7, PTK7
85	q12	rs56016894	6	69449455	70203760	rs56016894	BAI3
86	q13	rs9352202	6	75876767	76445075	rs9352202	FILIP1
87	q14.2	rs12193842	6	84195580	84466444	rs12193842	SNAP91
88	q16.1	rs12524320	6	93570222	98886500	rs62414081, rs12524320, rs806131, rs1206157, rs2503775	ATF1P1, RP11-524K14.1, RP3-463P15.1, KLHL32, RP11-436D23.1
89	q16.3	rs9480737	6	105001954	107456847	rs11285463, rs9480737	LINC00577, BEND3
90	q21	rs697642	6	111968250	112306397	rs697642	FYN
91	q22.32	rs1490384	6	126545036	130461810	rs1490384, rs4337952, rs6902109	MIR588, LAMA2, L3MBTL3
92	q24.3	rs12199557	6	147893472	148018479	rs12199557	SAMD5
93	q25.1	rs4870063	6	152171113	152398345	rs4870063	ESR1
94	q26	rs370097730	6	162890378	165318519	rs2846539, rs370097730, rs1566006	PARK2, PARK2, RP11-300M24.1
95	p22.3	rs138324521	7	964207	4010726	rs112302425, rs138324521, rs872464, rs2644312, rs68135341, rs7804059, rs2568524, rs12535195	C7orf50:AC073957.15, MAD1L1, MAD1L1, GNA12, SDK1, SDK1, SDK1, SDK1
96	p21.3	rs59700575	7	13678712	13779259	rs59700575	AC011288.2
97	p15.3	rs28541530	7	21396724	21709652	rs28541530	SP4
98	p15.2	rs7779546	7	27953364	28257321	rs7779546	JAZF1
99	p14.3	rs10233473	7	32247925	32457821	rs10233473	PDE1C
100	p13	rs10275309	7	44268785	44387014	rs10275309	CAMK2B
101	p12.2	rs2661876	7	49823972	50096782	rs2661876	VWC2
102	q11.22	rs75141388	7	68894722	72658989	rs78060431, rs75141388	AUTS2, CALN1
103	q21.11	rs4730347	7	78094640	78176624	rs4730347	MAGI2
104	q21.11	rs71117513	7	85767754	86625044	rs71117513	GRM3
105	q21.3	rs4236530	7	95648166	96677979	rs4236530, rs11769618	SLC25A13, DLX6-AS1
106	q31.1	rs12672452	7	108522148	109235327	rs848387, rs12672452	C7orf66, AC073071.1
107	q31.1	rs2040658	7	113530275	116720183	rs2040658, rs78607823, rs2045293, rs7797141, rs38857	FOXP2, FOXP2, FOXP2, RP11-222O23.1, MET
108	q31.32	rs3757540	7	121937298	122020759	rs3757540	CADPS2
109	q31.33	rs10487502	7	126944260	127836132	rs3824000, rs10487502	SND1, SND1
110	q34	rs79453306	7	140058376	140183018	rs17621014, rs79453306	MKRN1, MKRN1
111	q35	rs10081335	7	146582565	146739888	rs10081335	CNTNAP2
112	q36.3	rs7802866	7	157674708	157755871	rs7802866	PTPRN2
113	p23.1	rs7461062	8	8088230	12341535	rs330050, rs7814142, rs59028984, rs7461062	RP11-10A14.8, SOX7:SOX7:PINX1, XKR6, DEFB136
114	p12	rs76947678	8	35543181	36794427	rs76947678	RP11-962G15.1
115	q12.3	rs2011689	8	63846938	66484385	rs2011689, rs2150445433, rs1514508	CTD-3046C4.1, RP11-32K4.1, RP11-678D18.1
116	q21.11	rs78864863	8	75764145	77548571	rs78864863	AC016194.1
117	q21.3	rs5893143	8	91228721	92334136	rs5893143	NECAB1
118	q22.1	rs34358161	8	95350450	95742139	rs34358161	RP11-267M23.7
119	q22.3	rs10098039	8	106117391	106502453	rs10098039	RP11-127H5.1
120	q23.3	rs57603195	8	115016679	115863500	rs57603195	RP11-192P9.1
121	q24.3	rs59918340	8	141561857	142696491	rs11167016, rs59918340, rs1566085	PTK2, SLC45A4, AC138647.1
122	p23	rs10959640	9	10266786	14514321	rs587791, rs10756056, rs10959640, rs12004755, rs10756553	PTPRD, PTPRD, RP11-23D5.1, NFIB, NFIB
123	p21.3	rs10966547	9	24862969	25004127	rs10966547	RMRPP5
124	p21.1	rs13288673	9	31118965	31321155	rs13288673	RP11-572H4.1
125	q21.2	rs11145538	9	80287843	80908089	rs11145538	GNAQ
126	q22.31	rs2895249	9	95943304	96605924	rs2895249	PHF2
127	q31.2	rs996826	9	108756219	109112349	rs996826	RP11-6F6.1
128	q33.1	rs1333907	9	120327400	131159086	rs10983783, rs1333907, rs10818798, rs10818937, rs588818, rs7849174, rs3003575	RP11-281A20.2, RP11-360A18.2, STRBP, NEK6, SCAI, MAPKAP1, DNM1
129	q34.3	rs79140116	9	140072180	140428156	rs79140116	EXD3
130	p15.1	rs10795105	10	3990312	4233037	rs10795105	RP11-464C19.3
131	p13	rs10828248	10	16551917	22501895	rs57276326, rs12254400, rs10741041, rs2131316450, rs1339046, rs10764280, rs10828248	RSU1, CACNB2, CACNB2, NSUN6, RP11-288D15.1, NEBL, MLLT10
132	q22.2	rs4746339	10	76664836	77660765	rs6480771, rs4746339	DUSP13:SAMD8, C10orf11
133	q23.1	rs28800841	10	85928618	86417162	rs28800841	RGR
134	q24.32	rs12250380	10	103623986	107991779	rs3824754, rs57602965, rs10884031, rs11596250, rs12250380, rs4918211	C10orf32:C10orf32-ASMT, RPEL1, SORCS3, SORCS3, SORCS3, RP11-298H24.1
135	q26.13	rs10901842	10	126581095	126738471	rs10901842	ZRANB1
136	q26.3	rs12773533	10	134915611	135038088	rs12773533	RPL5P28
137	p15.2	rs10766073	11	13230507	17422619	rs10766073, rs12418276, rs757081	ARNTL, SOX6, NUCB2
138	p14.3	rs11028033	11	24549096	24629356	rs11028033	LUZP2
139	q12.1	rs61904011	11	57404779	58417882	rs61904011	OR9Q1
140	q12.3	rs584845	11	62309787	62697813	rs584845	TTC9C
141	q13.5	rs7123238	11	76413954	76511286	rs7123238	RP11-672A2.1
142	q23.2	rs236911	11	112602785	121832956	rs10789930, rs7122246, rs7125588, rs3793957, rs236911, rs4938724, rs1622638	NCAM1, DRD2, DRD2, CADM1, PCSK7, RP11-215D10.1, RNU6-256P
143	q25	rs6590700	11	133275575	134345274	rs6590700, rs74622686	OPCML, B3GAT1
144	p13.31	rs7965269	12	6953257	7151943	rs7965269	C12orf57:U47924.31:RNU7-1
145	p12.3	rs12309210	12	15308804	15568509	rs12309210	RERG
146	p12.3	rs4763522	12	18838805	19700204	rs17501788, rs74894866, rs4763522	RPL7P6, RPL7P6, PLEKHA5
147	p12.1	rs9804988	12	23784488	24291541	rs9804988, rs7314161, rs10842266	SOX5, SOX5, SOX5
148	q12	rs60064985	12	46076419	50160662	rs11183219, rs10880966, rs60064985	ARID2, RP11-96H19.1, SPATS2
149	q13.2	rs1081975	12	56354272	58469303	rs1081975, rs2140455406	SUOX, AVIL
150	q21.1	rs7977748	12	75194418	75564510	rs7977748	RP11-81K13.1
151	q21.31	rs401687	12	81430043	84771127	rs12425866, rs401687	PPFIA2, RP11-384P14.1
152	q21.33	rs60689454	12	89870544	90552234	rs60689454	RP11-654D12.2
153	q23.1	rs76904423	12	101128866	101588099	rs76904423	ANO4
154	q23.3	rs3764002	12	107548112	108629780	rs7295213, rs3764002	SETP7, WSCD2
155	q24.31	rs67624109	12	122459861	124330148	rs10847803, rs118097728, rs67624109	LRRC43, ABCB9, SBNO1
156	q13.2	rs67277443	13	34499488	34685032	rs67277443	VDAC1P12
157	q14.3	rs2408858	13	53605235	60832322	rs2408858, rs1512643, rs1333524, rs12866976	AL450423.1, SPATA2P1, DNAJA1P1, DIAPH3
158	q21.31	rs1460655	13	64623557	67019957	rs55855888, rs1460655, rs7988498	LINC00355, LINC01052, PCDH9
159	q22.1	rs78116502	13	74675573	74733764	rs78116502	KLF12
160	q12	rs28826952	14	29273706	29849733	rs28826952, rs17641673	RP11-148E17.1, RP11-562L8.1
161	q13.2	rs34034928	14	35895951	38218718	rs12432118, rs34034928	RP11-116N8.1, MIPOL1
162	q21.1	rs1137567	14	41931698	42547516	rs1137567	LRFN5
163	q21.2	rs1491905	14	46777783	47453632	rs1491905	MDGA2
164	q22.2	rs56262555	14	55239544	55916225	rs56262555	MAPK1IP1L
165	q24.1	rs10135971	14	69138011	69791308	rs61985013, rs4902677, rs10135971, rs1890940	ZFP36L1, ACTN1, DCAF5, GALNT16
166	q24.3	rs34253239	14	75019157	75668384	rs34253239	YLPM1
167	q32.2	rs3803286	14	101099721	104537680	rs7149242, rs3803286, rs7401901	RP11-566J3.2, TRAF3, PPP1R13B
168	q14	rs35134214	15	38817150	38999345	rs35134214	RASGRP1
169	q21.1	rs1915159	15	46298458	46618157	rs1915159	RP11-315O8.1
170	q23	rs11630322	15	69936071	69958471	rs11630322	RP11-279F6.3
171	q24.1	rs71137359	15	73564181	76134174	rs80100436, rs71137359, rs139642070, rs76621678	C15orf60, RP11-24D15.1, PPCDC, PTPN9:CTD-2323K18.1
172	q25.3	rs4369625	15	86790134	87109504	rs4369625	AGBL1
173	q26.1	rs6496748	15	91444476	91581269	rs6496748	VPS33B
174	q26.2	rs12438687	15	95870977	97247499	rs16975040, rs12438687	CTD-2536I1.1, RP11-522B15.4
175	p13.3	rs3752490	16	609130	792190	rs3752490	WDR90
176	p13.2	rs6497316	16	9683896	9778237	rs6497316	RNA5SP404
177	p12.1	rs62032342	16	25227828	25527156	rs62032342	ZKSCAN2
178	p11.2	rs8044030	16	29494017	31378235	rs7201780, rs8044030	MAPK3, FBXL19-AS1
179	q12.1	rs7187662	16	49536854	49653496	rs7187662	ZNF423
180	q21	rs1369788	16	60544428	60745208	rs1369788	RP11-354I13.1
181	q21	rs62053265	16	65919908	72260693	rs10557877, rs3759982, rs62053265, rs60783588	RP11-356O24.1, HAS3, WWP2, PKD1L3
182	q23.1	rs1683399	16	76989401	77367782	rs1683399, rs2232498	MON1B, MON1B
183	q24.3	rs164749	16	88706330	90153167	rs7190662, rs12927793, rs164749, rs3212349	MVD, CDH15, CHMP1A, RP11-566K11.7:MC1R
184	p13.2	rs79940062	17	3874536	5677345	rs79940062	MINK1
185	p11.2	rs203462	17	19713038	20440621	rs203462	AKAP10
186	q11.2	rs28494843	17	28661392	29255323	rs28494843	AC005562.1
187	q21.31	rs12936234	17	43081974	43334978	rs12936234	NMT1
188	q21.33	rs12453010	17	50188905	50342947	rs12453010	snoZ178
189	q23.2	rs117140195	17	60907107	61543178	rs117140195	TANC2:AC037445.1
190	q24.2	rs113985803	17	65762341	66204635	rs113985803	RP11-855A2.5
191	q25.1	rs62086015	17	74603634	74853404	rs62086015	CTD-2246P4.1
192	q11.2	rs1788823	18	20879432	21200467	rs1788823	NPC1
193	q12.1	rs17747003	18	30353181	31639037	rs726145, rs17747003	ASXL3, ASXL3
194	q12.2	rs12967741	18	35086406	35408205	rs12967741	CELF4
195	q12.3	rs6507431	18	38774061	39381834	rs17785503, rs6507431	RP11-142I20.1, RP11-188I24.1
196	q12.3	rs72902653	18	42627356	42885109	rs72902653	RP11-846C15.2
197	q21.2	rs17411339	18	49931122	53720256	rs12961437, rs9959803, rs17411339, rs1504741, rs34220720, rs118084819, rs375140529, rs613872	DCC, DCC, DCC, DCC, CTD-2171N6.1, TCF4, TCF4, TCF4
198	q23	rs11665567	18	77396601	77725683	rs545933, rs11665567	RP11-154H12.2, RP11-154H12.3
199	p13.3	rs13169	19	779908	2771573	rs13169, rs12461580	PTBP1, GNG7
200	p13.2	rs57148308	19	10649210	11180047	rs57148308	ILF3
201	p13.11	rs2023878	19	18597196	18911078	rs2023878	CRTC1
202	q13.12	rs4586564	19	35697823	38474060	rs8101606, rs4586564	HAMP, AC012309.5
203	q13.32	rs429358	19	45323170	45859884	rs12162222, rs429358, rs4884	PVRL2, APOE, CKM
204	q13.33	rs10401643	19	49943778	49995536	rs10401643	ALDH16A1
205	p13	rs56301259	20	1592215	1906028	rs56301259	SIRPA
206	p12.1	rs80044408	20	15828197	16043408	rs80044408	MACROD2
207	p11.23	rs6112505	20	19575017	21631378	rs6112505, rs11475262	SLC24A3, PLK1S1:RP4-777D9.2
208	q11.21	rs6119267	20	30689924	31400673	rs6119267	C20orf112
209	q12	rs4583528	20	41199435	42076976	rs6065515, rs4583528	PTPRT, SCARNA15
210	q13.2	rs1964133	20	50715685	51299884	rs1964133	ZFP64
211	q13.33	rs66486049	20	62018289	62910548	rs2738774, rs11473068, rs66486049, rs3003138	STMN3, ZBTB46, ZBTB46, MYT1
212	q22.3	rs150770076	21	43883205	46730056	rs150770076, rs3215899	AP001626.1, ADARB1
213	q12.2	rs111230813	22	30955094	32512070	rs113034943, rs111230813	OSBP2, RNU6-338P
214	q13.2	rs11373181	22	42691689	42859142	rs11373181	TCF20
215		rs12877	23	153297010	154562897	rs12877	RPL10:DNASE1L1

## Sheet: ST7
Supplementary Table 6. Credible sets identified using fine-mapping analyses. 95% credible set with posterior inclusion probability (PIP) and Bayes factor for causality in log 10 scale( log10(BF)) are obtained using FINEMAP snp sss argument. Credible sets (PP > 0.5) that contain the same variants as the index variant are shown in red and sets with a different lead variant is shown in blue
Region	Genomic_cord	indexSNP	Cond_Sig	novel	k	Post-Pr(# of causal SNPs is k)	log10bf	rsID	finemap_posterior_probability	CHR	hg19_bp	Allele1	Allele2	BETA	SE	P	Freq1	r2	symbol	biotype	func	CADD	RDB	pLI	eqtlMapts	eqtlDirection	ciMap	ciMapts
1	p36.23	rs12140566	Y	N	3	1	417.202	rs11587482	1	1	8743195	T	G	-0.00832178	0.001643	4.08e-07	0.8164	0.880549			intronic	3.773	6
1	p36.23	rs12140566	Y	N	3	1	233.9	rs12140566	1	1	8677188	T	G	0.00953273	0.00166075	9.467e-09	0.1786	1	RERE	protein_coding	intronic	2.709	3a	0.999996	eQTLGen_cis_eQTLs:BIOSQTL/BIOS_eQTL_geneLevel:GTEx/v8/Adipose_Subcutaneous:GTEx/v8/Adipose_Visceral_Omentum:GTEx/v8/Whole_Blood:GTEx/v8/Brain_Anterior_cingulate_cortex_BA24:GTEx/v8/Brain_Caudate_basal_ganglia:GTEx/v8/Brain_Cortex:GTEx/v8/Brain_Frontal_Cortex_BA9:GTEx/v8/Brain_Hippocampus:GTEx/v8/Brain_Nucleus_accumbens_basal_ganglia:GTEx/v8/Brain_Putamen_basal_ganglia:GTEx/v8/Muscle_Skeletal:GTEx…	-	No
1	p36.23	rs12140566	Y	N	3	1	199.23	rs74521170	1	1	8676924	A	C	0.00870303	0.00161466	7.057e-08	0.1921	0.936933			intronic	7.751	2b
2	p36.13	rs78695089	Y	N	2	1	19.0186	rs77198583	1	1	19465117	A	G	-0.0127592	0.00229193	2.588e-08	0.0841	0.957594	UBR4	protein_coding	intronic	2.461	4	1	eQTLGen_cis_eQTLs:GTEx/v8/Adipose_Subcutaneous:GTEx/v8/Adipose_Visceral_Omentum:GTEx/v8/Adrenal_Gland:GTEx/v8/Artery_Aorta:GTEx/v8/Artery_Tibial:GTEx/v8/Brain_Cerebellum:GTEx/v8/Nerve_Tibial	-	No
2	p36.13	rs78695089	Y	N	2	1	18.8959	rs34114464	1	1	19393531	T	C	0.00975986	0.00176937	3.471e-08	0.8475	0.525993	RP5-1126H10.2	3prime_overlapping_ncrna	intergenic	4.257	2b
3	p35.2	rs12739999	Y	N	3	1	413.93	rs10798888	1	1	32199099	T	G	0.0119289	0.00162209	1.926e-13	0.1898	0.986169	BAI2	protein_coding	intronic	3.145	5	0.995235			Yes	Promoter_anchored_loops
3	p35.2	rs12739999	Y	N	3	1	366.149	rs2050256	1	1	32204683	A	G	-0.0116644	0.00162637	7.365e-13	0.8115	0.945047	BAI2	protein_coding	intronic	0.862	5	0.995235			Yes	Promoter_anchored_loops
3	p35.2	rs12739999	Y	N	3	1	38.8243	rs55634335	1	1	32180167	A	T	-0.00995795	0.00179584	2.934e-08	0.8529	0.709435	COL16A1	protein_coding	intergenic	18.05	2b	3.38474e-15	PsychENCODE_eQTLs:GTEx/v8/Adipose_Subcutaneous:GTEx/v8/Brain_Caudate_basal_ganglia:GTEx/v8/Brain_Cortex:GTEx/v8/Brain_Frontal_Cortex_BA9:GTEx/v8/Brain_Hippocampus:GTEx/v8/Brain_Putamen_basal_ganglia	-	No
4	p34.3	rs17264866	Y	N	3	1	453.426	rs1707338	1	1	46511981	T	G	-0.00797674	0.00140957	1.519e-08	0.2847	0.708266	PIK3R3	protein_coding	intronic	9.265	6	1.40586e-06	PsychENCODE_eQTLs:eQTLGen_cis_eQTLs:BIOSQTL/BIOS_eQTL_geneLevel:GTEx/v8/Adipose_Subcutaneous:GTEx/v8/Whole_Blood:GTEx/v8/Artery_Tibial:GTEx/v8/Brain_Cortex	+	No
4	p34.3	rs17264866	Y	N	3	1	224.621	rs1768818	1	1	46514286	C	G	0.00796724	0.00140764	1.517e-08	0.714	0.708266	PIK3R3	protein_coding	intronic	0.852	6	1.40586e-06	PsychENCODE_eQTLs:eQTLGen_cis_eQTLs:BIOSQTL/BIOS_eQTL_geneLevel:GTEx/v8/Adipose_Subcutaneous:GTEx/v8/Whole_Blood:GTEx/v8/Artery_Tibial:GTEx/v8/Brain_Cortex	+	No
4	p34.3	rs17264866	Y	N	3	1	184.228	rs2293476	1	1	40036847	C	G	0.0108738	0.00190835	1.21e-08	0.2204	1	PABPC4	protein_coding	ncRNA_intronic	20.6	4	0.992493	eQTLGen_cis_eQTLs:BIOSQTL/BIOS_eQTL_geneLevel:GTEx/v8/Adipose_Subcutaneous:GTEx/v8/Adipose_Visceral_Omentum:GTEx/v8/Adrenal_Gland:GTEx/v8/Whole_Blood:GTEx/v8/Artery_Aorta:GTEx/v8/Artery_Tibial:GTEx/v8/Muscle_Skeletal:GTEx/v8/Nerve_Tibial	-	Yes	Fetal_Cortex
5	p33	rs6676515	Y	N	3	1	517.033	rs2484683	1	1	50849274	A	G	0.00942931	0.00127475	1.393e-13	0.4683	0.924386	HMGB1P45	pseudogene	intergenic	4.41
5	p33	rs6676515	Y	N	3	1	263.183	rs10888690	1	1	50960521	T	C	-0.00880432	0.00132455	2.99e-11	0.6392	0.670393	FAF1	protein_coding	intronic	1.587	7	0.997398	eQTLGen_cis_eQTLs:GTEx/v8/Muscle_Skeletal	+	No
5	p33	rs6676515	Y	N	3	1	240.695	rs2653881	0.999822	1	50858748	A	G	-0.0094162	0.00127453	1.493e-13	0.5303	0.94035	HMGB1P45	pseudogene	intergenic	3.179
6	p31.3	rs577841	Y	N	1	1	7.10078	rs577841	0.0480563	1	65731694	T	G	0.00893272	0.00151711	3.906e-09	0.7724	1	DNAJC6	protein_coding	intronic	9.557	3a	0.999188	GTEx/v8/Artery_Tibial:GTEx/v8/Brain_Spinal_cord_cervical_c-1	+	No
7	p31.1	rs34361149	Y	N	3	1	353.224	rs56142491	1	1	73128306	A	G	0.0110181	0.00193742	1.29e-08	0.8771	0.156968	RNU6-1246P	snRNA	intergenic	11.12	7
7	p31.1	rs34361149	Y	N	3	1	171.779	rs11210054	0.998699	1	73228715	T	C	-0.0106608	0.0017999	3.164e-09	0.1463	0.159286	RP4-660H19.1	lincRNA	ncRNA_intronic	4.607	7
7	p31.1	rs34361149	Y	N	3	1	70.1047	rs782218	0.678611	1	72925397	C	G	-0.00978784	0.00167371	4.968e-09	0.1751	0.853699	RPL31P12	pseudogene	intergenic	8.522	5
8	p31.1	rs71658797	Y	N	3	0.882786	61.9601	rs12042177	0.711744	1	77986638	A	G	-0.008679	0.00153883	1.696e-08	0.7813	0.455081	AK5	protein_coding	intronic	3.614	5	0.139499	PsychENCODE_eQTLs:eQTLGen_cis_eQTLs:BIOSQTL/BIOS_eQTL_geneLevel:GTEx/v8/Whole_Blood:GTEx/v8/Nerve_Tibial	-	No
8	p31.1	rs71658797	Y	N	3	0.882786	61.4313	rs71658797	0.894894	1	77967507	A	T	0.0135411	0.00194836	3.663e-12	0.1213	1	AK5	protein_coding	intronic	10.96	5	0.139499	PsychENCODE_eQTLs:eQTLGen_cis_eQTLs:BIOSQTL/BIOS_eQTL_geneLevel:GTEx/v8/Whole_Blood:GTEx/v8/Nerve_Tibial	-	No
8	p31.1	rs71658797	Y	N	3	0.882786	2.7207	rs6695572	0.99542	1	77945635	A	G	0.0087139	0.00154914	1.852e-08	0.2147	0.465252	AK5	protein_coding	intronic	3.1	7	0.139499	PsychENCODE_eQTLs:eQTLGen_cis_eQTLs:BIOSQTL/BIOS_eQTL_geneLevel:GTEx/v8/Whole_Blood:GTEx/v8/Nerve_Tibial	-	No
8	p31.1	rs71658797	Y	N	2	0.117214	65.9874	rs71658797	0.900793	1	77967507	A	T	0.0135411	0.00194836	3.663e-12	0.1213	1	AK5	protein_coding	intronic	10.96	5	0.139499	PsychENCODE_eQTLs:eQTLGen_cis_eQTLs:BIOSQTL/BIOS_eQTL_geneLevel:GTEx/v8/Whole_Blood:GTEx/v8/Nerve_Tibial	-	No
8	p31.1	rs71658797	Y	N	2	0.117214	62.4967	rs12042177	0.712783	1	77986638	A	G	-0.008679	0.00153883	1.696e-08	0.7813	0.455081	AK5	protein_coding	intronic	3.614	5	0.139499	PsychENCODE_eQTLs:eQTLGen_cis_eQTLs:BIOSQTL/BIOS_eQTL_geneLevel:GTEx/v8/Whole_Blood:GTEx/v8/Nerve_Tibial	-	No
9	p22.2	rs17130426	Y	Y	3	1	117.977	rs75391630	1	1	88702696	T	C	-0.0155818	0.00280703	2.845e-08	0.0543	0.335792	CTA-21C21.1	pseudogene	intergenic	0.075	5
9	p22.2	rs17130426	Y	Y	3	1	72.2492	rs4656036	1	1	88815650	A	C	0.0118352	0.00204443	7.092e-09	0.8914	0.82114	CTA-21C21.1	pseudogene	intergenic	2.256	7
9	p22.2	rs17130426	Y	Y	3	1	46.8487	rs926795	0.650109	1	88823272	T	C	0.0103725	0.00176794	4.429e-09	0.8472	0.621703	CTA-21C21.1	pseudogene	intergenic	0.461	7
10	p21.3	rs6658412	Y	N	3	1	489.374	rs12077962	1	1	98446194	C	G	0.00831951	0.00147981	1.884e-08	0.2446	0.740777	MIR137HG	lincRNA	intergenic	2.39	5
10	p21.3	rs6658412	Y	N	3	1	230.677	rs7524038	0.628434	1	98345019	A	G	-0.00890426	0.00147275	1.484e-09	0.7519	0.954497	DPYD	protein_coding	intronic	10.66	6	4.18972e-09	PsychENCODE_eQTLs:eQTLGen_cis_eQTLs:BIOSQTL/BIOS_eQTL_geneLevel	-	Yes	Hippocampus
10	p21.3	rs6658412	Y	N	3	1	209.548	rs4970721	1	1	98342067	A	C	-0.00889755	0.00147335	1.552e-09	0.7522	0.954497	DPYD	protein_coding	intronic	2.433	5	4.18972e-09	PsychENCODE_eQTLs:eQTLGen_cis_eQTLs:BIOSQTL/BIOS_eQTL_geneLevel	-	Yes	Hippocampus
11	p21.1	rs12722976	Y	N	3	1	85.0298	rs4907985	1	1	103341016	A	T	0.00705705	0.00127269	2.936e-08	0.5139	0.988205	COL11A1	protein_coding	intergenic	4.159	6	0.999981	PsychENCODE_eQTLs:GTEx/v8/Nerve_Tibial	+	No
11	p21.1	rs12722976	Y	N	3	1	62.6845	rs12722976	0.893679	1	103345744	C	G	-0.00719383	0.00127257	1.575e-08	0.4879	1	COL11A1	protein_coding	intronic	0.19	6	0.999981	PsychENCODE_eQTLs:GTEx/v8/Nerve_Tibial	+	No
11	p21.1	rs12722976	Y	N	3	1	13.9953	rs12046389	0.504295	1	103409100	A	C	-0.00719368	0.00128298	2.053e-08	0.4353	0.537106	COL11A1	protein_coding	intronic	1.701	6	0.999981	PsychENCODE_eQTLs:GTEx/v8/Nerve_Tibial	+	No
12	p13.3	rs12033257	Y	N	3	1	299.138	rs12033257	1	1	112318484	A	G	0.0100266	0.001604	4.067e-10	0.6194	1	KCND3	protein_coding	UTR3	1.056	5	0.803753	PsychENCODE_eQTLs	-	No
12	p13.3	rs12033257	Y	N	3	1	209.402	rs6687953	1	1	112293512	A	G	-0.00671648	0.0012894	1.901e-07	0.5814	0.311007			intronic	1.083	7
12	p13.3	rs12033257	Y	N	3	1	76.0014	rs72646553	0.841421	1	109940503	C	G	-0.00911463	0.00190404	1.691e-06	0.2218	0.829847			exonic	18.7	4
13	p12	rs1289948	Y	N	3	0.999433	33.9517	rs1289948	0.148719	1	117957288	A	G	-0.00863575	0.00147117	4.356e-09	0.2489	1	MAN1A2	protein_coding	intronic	1.338	7	0.996263	PsychENCODE_eQTLs:eQTLGen_cis_eQTLs:BIOSQTL/BIOS_eQTL_geneLevel:GTEx/v8/Adipose_Subcutaneous:GTEx/v8/Adipose_Visceral_Omentum:GTEx/v8/Artery_Tibial:GTEx/v8/Muscle_Skeletal:GTEx/v8/Nerve_Tibial	-	No
13	p12	rs1289948	Y	N	3	0.999433	31.5438	rs3820500	1	1	118013322	A	G	0.00776151	0.00135383	9.887e-09	0.671	0.663582	MAN1A2	protein_coding	intronic	5.367	5	0.996263	PsychENCODE_eQTLs:eQTLGen_cis_eQTLs:BIOSQTL/BIOS_eQTL_geneLevel:GTEx/v8/Adipose_Subcutaneous:GTEx/v8/Adipose_Visceral_Omentum:GTEx/v8/Artery_Tibial:GTEx/v8/Muscle_Skeletal:GTEx/v8/Nerve_Tibial	-	No
13	p12	rs1289948	Y	N	3	0.999433	5.00263	rs1289882	1	1	117903516	T	C	0.013916	0.00241054	7.771e-09	0.1184	1	RP11-188D8.1	lincRNA	intergenic	1.673	6
14	q21.2	rs60709164	Y	N	3	1	319.153	rs4351684	1	1	153636860	A	G	-0.00695002	0.00127336	4.805e-08	0.4786	0.771522	ILF2	protein_coding	intronic	4.058	1f	0.997052	eQTLGen_cis_eQTLs:BIOSQTL/BIOS_eQTL_geneLevel	+	No
14	q21.2	rs60709164	Y	N	3	1	99.2727	rs28416529	1	1	153595381	A	G	0.00698919	0.00127308	4.018e-08	0.5186	0.949937	S100A13	protein_coding	intronic	1.882	6	0.0351531	PsychENCODE_eQTLs:eQTLGen_cis_eQTLs:BIOSQTL/BIOS_eQTL_geneLevel:BRAINEAC/HIPP:BRAINEAC/TCTX:BRAINEAC/THAL:BRAINEAC/WHMT:GTEx/v8/Adipose_Subcutaneous:GTEx/v8/Cells_EBV-transformed_lymphocytes:GTEx/v8/Whole_Blood:GTEx/v8/Artery_Aorta:GTEx/v8/Artery_Tibial:GTEx/v8/Brain_Amygdala:GTEx/v8/Brain_Anterior_cingulate_cortex_BA24:GTEx/v8/Brain_Caudate_basal_ganglia:GTEx/v8/Brain_Cerebellum:GTEx/v8/Brain_Co…	+	No
14	q21.2	rs60709164	Y	N	3	1	81.8134	rs115815732	1	1	150382759	T	C	0.0145094	0.0026477	4.243e-08	0.9385	1	RPRD2	protein_coding	intronic	4.799	3a	0.999977	PsychENCODE_eQTLs:eQTLGen_cis_eQTLs:BIOSQTL/BIOS_eQTL_geneLevel:GTEx/v8/Adipose_Subcutaneous:GTEx/v8/Adipose_Visceral_Omentum:GTEx/v8/Whole_Blood:GTEx/v8/Artery_Aorta:GTEx/v8/Artery_Coronary:GTEx/v8/Artery_Tibial:GTEx/v8/Brain_Caudate_basal_ganglia:GTEx/v8/Brain_Hippocampus:GTEx/v8/Muscle_Skeletal:GTEx/v8/Nerve_Tibial	+	No
15	q24.1	rs686610	Y	Y	3	1	345.798	rs525275	0.989736	1	168708851	A	T	0.00817119	0.00127277	1.363e-10	0.5151	1	AL049798.1	miRNA	intergenic	3.979	7
15	q24.1	rs686610	Y	Y	3	1	174.427	rs60267036	1	1	168716860	A	AC	-0.00864112	0.00155864	2.952e-08	0.5183	0.916371	AL049798.1	miRNA	downstream	0.754
15	q24.1	rs686610	Y	Y	3	1	172.286	rs7534485	1	1	168720621	T	C	-0.00807859	0.00127222	2.158e-10	0.5033	0.916371	AL049798.1	miRNA	intergenic	2.353	2b
16	q25.1	rs7536102	Y	N	3	1	718.223	rs6685314	1	1	174059043	A	G	0.00922261	0.00128056	5.948e-13	0.5571	0.453147	RPL30P1	pseudogene	downstream	0.737	7
16	q25.1	rs7536102	Y	N	3	1	443.258	rs12083628	0.53473	1	174541235	C	G	-0.0107252	0.00142075	4.384e-14	0.2774	1	RABGAP1L	protein_coding	intronic	0.823	5	0.0891727	PsychENCODE_eQTLs:eQTLGen_cis_eQTLs:BIOSQTL/BIOS_eQTL_geneLevel:GTEx/v8/Adipose_Subcutaneous:GTEx/v8/Adipose_Visceral_Omentum:GTEx/v8/Whole_Blood:GTEx/v8/Artery_Aorta:GTEx/v8/Brain_Cortex:GTEx/v8/Brain_Frontal_Cortex_BA9:GTEx/v8/Muscle_Skeletal:GTEx/v8/Nerve_Tibial	-	No
16	q25.1	rs7536102	Y	N	3	1	295.599	rs202227715	1	1	174116289	CAT	C	-0.0111867	0.00176391	2.273e-10	0.2789	0.972316	RP11-160H22.5	lincRNA	ncRNA_intronic	11.81
17	q31.1	rs11332270	Y	N	3	1	404.265	rs1246703	1	1	191300385	T	C	-0.00898967	0.00136704	4.831e-11	0.683	0.788661	RP11-309H21.2	lincRNA	intergenic	0.493	6
17	q31.1	rs11332270	Y	N	3	1	312.069	rs57759357	1	1	191408693	T	C	0.00899613	0.00133335	1.512e-11	0.3503	0.945306	RP11-309H21.2	lincRNA	intergenic	0.203	6
17	q31.1	rs11332270	Y	N	3	1	95.3733	rs1246840	0.999979	1	191262219	A	T	0.0089277	0.00136509	6.156e-11	0.3187	0.7892	RP11-309H21.2	lincRNA	intergenic	1.887	6
18	q31.3	rs12561959	Y	N	3	1	393.692	rs10922386	1	1	198199803	T	C	-0.0101564	0.00146262	3.805e-12	0.7467	0.931287	NEK7	protein_coding	intronic	0.513	7	0.707658	PsychENCODE_eQTLs:eQTLGen_cis_eQTLs:BIOSQTL/BIOS_eQTL_geneLevel:GTEx/v8/Artery_Tibial:GTEx/v8/Brain_Spinal_cord_cervical_c-1:GTEx/v8/Nerve_Tibial	+	Yes	Adult_Cortex:Fetal_Cortex
18	q31.3	rs12561959	Y	N	3	1	282.862	rs10922382	0.768572	1	198190386	A	G	0.0101902	0.00146242	3.226e-12	0.2534	0.931287	NEK7	protein_coding	intronic	0.704	5	0.707658	PsychENCODE_eQTLs:eQTLGen_cis_eQTLs:BIOSQTL/BIOS_eQTL_geneLevel:GTEx/v8/Artery_Tibial:GTEx/v8/Brain_Spinal_cord_cervical_c-1:GTEx/v8/Nerve_Tibial	+	Yes	Adult_Cortex:Fetal_Cortex
18	q31.3	rs12561959	Y	N	3	1	115.077	rs12561959	0.99889	1	198293574	A	G	0.0102096	0.00143939	1.315e-12	0.2661	1	NEK7	protein_coding	intergenic	0.283	7	0.707658	PsychENCODE_eQTLs:eQTLGen_cis_eQTLs:BIOSQTL/BIOS_eQTL_geneLevel:GTEx/v8/Artery_Tibial:GTEx/v8/Brain_Spinal_cord_cervical_c-1:GTEx/v8/Nerve_Tibial	+	Yes	Adult_Cortex:Fetal_Cortex
19	q32.2	rs4328122	Y	Y	2	0.999997	7.1268	rs4328122	0.217893	1	210834507	A	G	-0.00833305	0.00136028	8.993e-10	0.677	1	HHAT	protein_coding	intronic	7.695	7	0.000341684	eQTLGen_cis_eQTLs	+	No
19	q32.2	rs4328122	Y	Y	2	0.999997	6.99468	rs12121954	0.261352	1	210830431	T	C	-0.00827938	0.00135973	1.138e-09	0.6765	0.995742	HHAT	protein_coding	intronic	2.796	5	0.000341684	eQTLGen_cis_eQTLs	+	No
20	q32.3	rs12124666	N	Y	3	1	112.543	rs4655245	1	1	214502465	T	C	-0.0098706	0.00196313	4.965e-07	0.1192	0.788822			intronic	4.971	3a
20	q32.3	rs12124666	N	Y	3	1	58.0573	rs1134647	1	1	214492286	A	G	0.0117671	0.00213948	3.788e-08	0.902	1	SMYD2	protein_coding	exonic	16.68	4	0.00536894	PsychENCODE_eQTLs:eQTLGen_cis_eQTLs	+	No
20	q32.3	rs12124666	N	Y	3	1	55.863	rs12124666	1	1	214491961	T	C	0.0116551	0.00209361	2.599e-08	0.8971	1	SMYD2	protein_coding	intronic	0.259	4	0.00536894	PsychENCODE_eQTLs:eQTLGen_cis_eQTLs	+	No
21	q42.13	rs6666360	Y	Y	2	0.617732	2.45935	rs6666360	0.441226	1	229830140	A	C	-0.0103497	0.00185912	2.598e-08	0.1354	1	RP11-108F13.2	pseudogene	intergenic	4.726	4
21	q42.13	rs6666360	Y	Y	2	0.617732	1.07124	rs28723630	1	1	230150116	A	G	-0.0102643	0.00205697	6.026e-07	0.1071	0.330028			intergenic	3.787	7
21	q42.13	rs6666360	Y	Y	1	0.382268	5.42372	rs6666360	0.493475	1	229830140	A	C	-0.0103497	0.00185912	2.598e-08	0.1354	1	RP11-108F13.2	pseudogene	intergenic	4.726	4
22	q43	rs12032174	Y	N	2	0.679544	7.12355	rs12032174	0.963666	1	237856168	T	C	0.00838334	0.0013345	3.343e-10	0.651	1	RYR2	protein_coding	intronic	0.38	5	1			No
22	q43	rs12032174	Y	N	2	0.679544	1.25578	rs7532996	0.988886	1	237858185	A	G	0.00589233	0.00167111	0.0004216	0.661	0.90641			intronic	0.034	7
22	q43	rs12032174	Y	N	1	0.304064	7.25592	rs12032174	0.963906	1	237856168	T	C	0.00838334	0.0013345	3.343e-10	0.651	1	RYR2	protein_coding	intronic	0.38	5	1			No
23	q43	rs3897821	Y	N	3	1	563.303	rs12741781	1	1	243428152	T	G	-0.00910862	0.00136071	2.175e-11	0.6774	0.9105	SDCCAG8	protein_coding	intronic	12.73	1b	1.32893e-07	PsychENCODE_eQTLs:eQTLGen_cis_eQTLs:BIOSQTL/BIOS_eQTL_geneLevel:GTEx/v8/Adipose_Subcutaneous:GTEx/v8/Adipose_Visceral_Omentum:GTEx/v8/Cells_EBV-transformed_lymphocytes:GTEx/v8/Whole_Blood:GTEx/v8/Artery_Aorta:GTEx/v8/Artery_Coronary:GTEx/v8/Artery_Tibial:GTEx/v8/Brain_Caudate_basal_ganglia:GTEx/v8/Brain_Cerebellum:GTEx/v8/Brain_Cortex:GTEx/v8/Brain_Frontal_Cortex_BA9:GTEx/v8/Brain_Hippocampus:GTE…	+	No
23	q43	rs3897821	Y	N	3	1	287.913	rs12084733	0.999889	1	243467236	A	G	0.00837802	0.00138755	1.563e-09	0.3004	0.845878	SDCCAG8	protein_coding	intronic	0.059	7	1.32893e-07	PsychENCODE_eQTLs:eQTLGen_cis_eQTLs:BIOSQTL/BIOS_eQTL_geneLevel:GTEx/v8/Adipose_Subcutaneous:GTEx/v8/Adipose_Visceral_Omentum:GTEx/v8/Cells_EBV-transformed_lymphocytes:GTEx/v8/Whole_Blood:GTEx/v8/Artery_Aorta:GTEx/v8/Artery_Coronary:GTEx/v8/Artery_Tibial:GTEx/v8/Brain_Caudate_basal_ganglia:GTEx/v8/Brain_Cerebellum:GTEx/v8/Brain_Cortex:GTEx/v8/Brain_Frontal_Cortex_BA9:GTEx/v8/Brain_Hippocampus:GTE…	+	No
23	q43	rs3897821	Y	N	3	1	274.908	rs35899158	1	1	243146373	T	C	0.0081307	0.00134015	1.303e-09	0.3428	0.307627	RP11-331N16.1	pseudogene	intergenic	3.082
24	p24.3	rs13012094	Y	N	2	0.872239	201.794	rs13012094	1	2	16631289	T	C	0.00773519	0.00136351	1.403e-08	0.6799	1	AC010880.1	lincRNA	intergenic	16.22	7
24	p24.3	rs13012094	Y	N	2	0.872239	200.416	rs11889461	1	2	16700727	A	G	-0.00714758	0.00140617	3.72e-07	0.287	0.641106			intergenic	0.742	7
24	p24.3	rs13012094	Y	N	3	0.127761	202.879	rs13012094	1	2	16631289	T	C	0.00773519	0.00136351	1.403e-08	0.6799	1	AC010880.1	lincRNA	intergenic	16.22	7
24	p24.3	rs13012094	Y	N	3	0.127761	169.476	rs11889461	1	2	16700727	A	G	-0.00714758	0.00140617	3.72e-07	0.287	0.641106			intergenic	0.742	7
24	p24.3	rs13012094	Y	N	3	0.127761	0.286001	rs6531114	0.61143	2	16617781	T	C	-0.00813429	0.00176296	3.944e-06	0.2794	0.811803			intergenic	0.062	7
25	p24.1	rs4416248	Y	N	3	1	323.11	rs1554268	1	2	22431110	T	C	0.00814386	0.0012937	3.071e-10	0.5908	0.58485	AC068490.2	lincRNA	ncRNA_intronic	1.533	6
25	p24.1	rs4416248	Y	N	3	1	286.444	rs12052648	1	2	22535566	A	C	-0.00777945	0.00127323	9.958e-10	0.4798	0.515878	AC068490.2	lincRNA	ncRNA_intronic	5.077	6
25	p24.1	rs4416248	Y	N	3	1	41.484	rs57974740	1	2	22495845	T	C	-0.00783569	0.00127223	7.325e-10	0.4959	0.524284	AC068490.2	lincRNA	ncRNA_intronic	2.655	7
26	p23.3	rs6705514	Y	N	3	1	934.407	rs6716275	1	2	27227707	A	G	-0.0108026	0.00130909	1.559e-16	0.3821	0.949737	MAPRE3	protein_coding	ncRNA_intronic	1.814	6	0.799864	PsychENCODE_eQTLs:eQTLGen_cis_eQTLs:BIOSQTL/BIOS_eQTL_geneLevel:GTEx/v8/Adipose_Subcutaneous:GTEx/v8/Adipose_Visceral_Omentum:GTEx/v8/Adrenal_Gland:GTEx/v8/Whole_Blood:GTEx/v8/Artery_Aorta:GTEx/v8/Artery_Tibial:GTEx/v8/Muscle_Skeletal:GTEx/v8/Nerve_Tibial	-	No
26	p23.3	rs6705514	Y	N	3	1	537.012	rs13014240	0.995008	2	27286398	C	G	0.0105575	0.00131639	1.059e-15	0.6285	0.798263	AGBL5	protein_coding	intronic	0.922	5	0.0206949	eQTLGen_cis_eQTLs	-	No
26	p23.3	rs6705514	Y	N	3	1	400.05	rs11887401	1	2	27181112	T	G	0.0107568	0.00131021	2.211e-16	0.6196	0.899481	AC013472.4	antisense	ncRNA_intronic	1.503	6
27	p23.1	rs56229323	Y	N	3	1	915.447	rs4952205	0.99999	2	32297273	A	G	-0.00994429	0.00130691	2.768e-14	0.6145	0.965922	SPAST	protein_coding	intronic	0.458	7	0.997075	eQTLGen_cis_eQTLs:BIOSQTL/BIOS_eQTL_geneLevel:GTEx/v8/Adipose_Subcutaneous:GTEx/v8/Muscle_Skeletal	+	No
27	p23.1	rs56229323	Y	N	3	1	463.832	rs3769604	1	2	32322495	A	G	0.00995772	0.001302	2.044e-14	0.3936	0.980787	SPAST	protein_coding	intronic	3.159		0.997075	eQTLGen_cis_eQTLs:BIOSQTL/BIOS_eQTL_geneLevel:GTEx/v8/Adipose_Subcutaneous:GTEx/v8/Muscle_Skeletal	+	No
27	p23.1	rs56229323	Y	N	3	1	454.088	rs212737	1	2	32474291	T	C	0.00925737	0.00131143	1.676e-12	0.3786	0.90348	NLRC4	protein_coding	intronic	2.205		4.35115e-08	PsychENCODE_eQTLs:eQTLGen_cis_eQTLs:BIOSQTL/BIOS_eQTL_geneLevel:GTEx/v8/Adipose_Subcutaneous:GTEx/v8/Cells_EBV-transformed_lymphocytes:GTEx/v8/Whole_Blood:GTEx/v8/Artery_Tibial:GTEx/v8/Brain_Cortex:GTEx/v8/Nerve_Tibial	-	No
28	p16.3	rs76376207	Y	N	3	1	395.142	rs858937	1	2	50969073	T	C	-0.0107913	0.00196669	4.089e-08	0.8813	0.516798	NRXN1	protein_coding	intronic	8.649	6	0.999949	eQTLGen_cis_eQTLs:GTEx/v8/Nerve_Tibial	-	No
28	p16.3	rs76376207	Y	N	3	1	178.398	rs79552484	0.998167	2	51086538	A	C	0.0143681	0.00237058	1.355e-09	0.0781	0.898035	NRXN1	protein_coding	intronic	1.5	5	0.999949	eQTLGen_cis_eQTLs:GTEx/v8/Nerve_Tibial	-	No
28	p16.3	rs76376207	Y	N	3	1	150.692	rs17569963	0.999967	2	51077569	A	G	0.0111685	0.00187202	2.431e-09	0.1332	0.452528	NRXN1	protein_coding	intronic	0.335	7	0.999949	eQTLGen_cis_eQTLs:GTEx/v8/Nerve_Tibial	-	No
29	p16.1	rs359258	Y	N	3	1	266.208	rs2668732	1	2	60487015	A	C	-0.0104127	0.00165491	3.14e-10	0.3533	0.948052	AC007381.3	lincRNA	intergenic	0.843	6
29	p16.1	rs359258	Y	N	3	1	156.995	rs359260	1	2	60486936	T	G	0.0102459	0.00165684	6.264e-10	0.6485	0.98776	AC007381.3	lincRNA	intergenic	1.525	7
29	p16.1	rs359258	Y	N	3	1	104.141	rs1553933	1	2	60509080	T	C	0.0102447	0.00129745	2.884e-15	0.5982	0.812455	AC007381.3	lincRNA	intergenic	1.187	4
30	p12	rs114089087	Y	Y	3	1	624.564	rs59716473	1	2	80708973	A	G	0.0105477	0.00174833	1.607e-09	0.7128	0.970271	CTNNA2	protein_coding	intronic	1.7	5	0.999718			No
30	p12	rs114089087	Y	Y	3	1	324.998	rs61668542	0.620135	2	83246143	T	G	-0.0113805	0.00185623	8.706e-10	0.8641	0.881408	AC098817.5	pseudogene	intergenic	0.082	7
30	p12	rs114089087	Y	Y	3	1	319.882	rs10210869	1	2	83226540	C	G	-0.0113628	0.00188407	1.634e-09	0.8688	0.973947	AC098817.5	pseudogene	intergenic	3.178	6
31	q11.2	rs4850917	Y	N	3	1	237.773	rs6713944	1	2	100500839	T	C	0.0104009	0.00163742	2.123e-10	0.6289	0.983541	AFF3	protein_coding	intronic	5.071	7	0.998913	eQTLGen_cis_eQTLs:GTEx/v8/Adipose_Subcutaneous:GTEx/v8/Brain_Anterior_cingulate_cortex_BA24:GTEx/v8/Nerve_Tibial	+	No
31	q11.2	rs4850917	Y	N	3	1	169.279	rs10514777	1	2	100264229	A	G	-0.00903731	0.00159839	1.568e-08	0.8027	0.16216	AFF3	protein_coding	intronic	6.529	7	0.998913	eQTLGen_cis_eQTLs:GTEx/v8/Adipose_Subcutaneous:GTEx/v8/Brain_Anterior_cingulate_cortex_BA24:GTEx/v8/Nerve_Tibial	+	No
31	q11.2	rs4850917	Y	N	3	1	77.2853	rs7590354	0.997951	2	100497843	T	C	-0.0103877	0.00165094	3.136e-10	0.3571	0.967805	AFF3	protein_coding	intronic	11.42	7	0.998913	eQTLGen_cis_eQTLs:GTEx/v8/Adipose_Subcutaneous:GTEx/v8/Brain_Anterior_cingulate_cortex_BA24:GTEx/v8/Nerve_Tibial	+	No
32	q12.1	rs264957	Y	N	3	1	94.6659	rs2971638	0.995106	2	107625202	A	G	-0.00715665	0.00127275	1.881e-08	0.5147	0.981216	AC005040.3	pseudogene	intergenic	4.608
32	q12.1	rs264957	Y	N	3	1	77.2283	rs10204051	0.999991	2	103775435	T	G	0.00738101	0.0012956	1.222e-08	0.4054	1	AC073987.1	lincRNA	ncRNA_intronic	2.299	7
32	q12.1	rs264957	Y	N	3	1	21.4025	rs12996280	0.97632	2	107575336	C	G	0.00703321	0.00128884	4.843e-08	0.4199	0.464781	AC005040.3	pseudogene	intergenic	2.643	6
33	q22.1	rs28396876	Y	N	3	1	61.8079	rs56771465	1	2	139437131	A	C	0.00726382	0.00132915	4.621e-08	0.3552	0.995683	NXPH2	protein_coding	intronic	0.088	7	0.798014			No
33	q22.1	rs28396876	Y	N	3	1	54.5505	rs35942385	0.677697	2	144208523	T	G	-0.00797288	0.00133415	2.281e-09	0.3494	0.931645	ARHGAP15	protein_coding	ncRNA_intronic	18.94	5	5.25406e-06	PsychENCODE_eQTLs:eQTLGen_cis_eQTLs:BIOSQTL/BIOS_eQTL_geneLevel:GTEx/v8/Adipose_Visceral_Omentum:GTEx/v8/Artery_Tibial:GTEx/v8/Muscle_Skeletal:GTEx/v8/Nerve_Tibial	-	No
33	q22.1	rs28396876	Y	N	3	1	11.6792	rs10172890	0.997101	2	144493822	A	C	-0.00879471	0.00131973	2.672e-11	0.367	0.967362	ARHGAP15	protein_coding	ncRNA_intronic	2.884	6	5.25406e-06	PsychENCODE_eQTLs:eQTLGen_cis_eQTLs:BIOSQTL/BIOS_eQTL_geneLevel:GTEx/v8/Adipose_Visceral_Omentum:GTEx/v8/Artery_Tibial:GTEx/v8/Muscle_Skeletal:GTEx/v8/Nerve_Tibial	-	No
34	q24.2	rs35698743	Y	Y	3	1	277.441	rs12992748	1	2	164394526	A	G	-0.0100168	0.00172407	6.249e-09	0.6987	0.858373	FIGN	protein_coding	intergenic	12.86	5	0.741736	GTEx/v8/Brain_Putamen_basal_ganglia	+	No
34	q24.2	rs35698743	Y	Y	3	1	177.248	rs7421396	1	2	164403334	A	G	0.0105993	0.00175835	1.659e-09	0.2818	1	FIGN	protein_coding	intergenic	0.55	7	0.741736	GTEx/v8/Brain_Putamen_basal_ganglia	+	No
34	q24.2	rs35698743	Y	Y	3	1	100.738	rs6744345	1	2	160510847	T	C	0.0207032	0.00367013	1.692e-08	0.969	0.227499	AC009961.3	lincRNA	intergenic	6.193	7
35	q31.1	rs10182067	Y	N	3	1	495.676	rs959465	1	2	171588502	T	G	-0.00922388	0.00133738	5.328e-12	0.6542	1	AC007405.4	lincRNA	ncRNA_intronic	0.376
35	q31.1	rs10182067	Y	N	3	1	405.355	rs28780764	0.999997	2	171591943	A	C	0.00928793	0.00133774	3.831e-12	0.3454	0.995555	AC007405.4	lincRNA	ncRNA_intronic	14.06	7
35	q31.1	rs10182067	Y	N	3	1	101.152	rs7582425	1	2	171598302	A	T	0.0085542	0.00135351	2.623e-10	0.3293	0.952314	AC007405.4	lincRNA	ncRNA_intronic	0.192	7
36	q33.3	rs55772859	Y	N	3	1	602.691	rs114354942	1	2	206891138	T	C	-0.0145333	0.00215724	1.618e-11	0.0962	1	INO80D	protein_coding	intronic	1.987	6	0.99818			No
36	q33.3	rs55772859	Y	N	3	1	411.505	rs7586399	0.995047	2	208046439	A	G	0.0105527	0.00132973	2.083e-15	0.3545	0.836465	AC007879.1	lincRNA	ncRNA_intronic	12.78	5
36	q33.3	rs55772859	Y	N	3	1	194.587	rs6732156	1	2	208044947	T	C	0.0104537	0.00133117	4.057e-15	0.3528	0.839151	AC007879.1	lincRNA	ncRNA_intronic	0.79	5
37	q35	rs2280039	Y	N	3	1	397.19	rs1078212	1	2	220357594	A	C	-0.00858242	0.00135648	2.499e-10	0.3265	0.916421	SPEG	protein_coding	ncRNA_intronic	8.286	4	0.99979	BIOSQTL/BIOS_eQTL_geneLevel:GTEx/v8/Brain_Cerebellar_Hemisphere:GTEx/v8/Brain_Cerebellum:GTEx/v8/Muscle_Skeletal	-	Yes	Adult_Cortex:Fetal_Cortex
37	q35	rs2280039	Y	N	3	1	260.504	rs1397429	1	2	220350587	T	C	0.00797708	0.00134839	3.302e-09	0.6657	0.868803	SPEG	protein_coding	ncRNA_intronic	1.102	5	0.99979	BIOSQTL/BIOS_eQTL_geneLevel:GTEx/v8/Brain_Cerebellar_Hemisphere:GTEx/v8/Brain_Cerebellum:GTEx/v8/Muscle_Skeletal	-	Yes	Adult_Cortex:Fetal_Cortex
37	q35	rs2280039	Y	N	3	1	121.495	rs17315907	1	2	222879533	A	G	0.00767309	0.00127228	1.626e-09	0.4943	1	AC009302.4	pseudogene	intergenic	4.984	7
38	p26.3	rs75120399	Y	Y	1	1	5.80622	rs75120399	0.194922	3	2306480	T	C	-0.0103396	0.00185165	2.353e-08	0.8633	1	CNTN4	protein_coding	intronic	5.685	6	0.996606			No
39	p24.3	rs62237509	Y	N	3	0.999992	92.8859	rs62237509	1	3	20724955	A	T	-0.00856741	0.00144305	2.912e-09	0.264	1	RNU6-815P	snRNA	intergenic	5.947	7
39	p24.3	rs62237509	Y	N	3	0.999992	91.9089	rs4635727	1	3	18705035	A	G	0.0077582	0.00139913	2.933e-08	0.7081	1	AC144521.1	processed_transcript	ncRNA_intronic	11
39	p24.3	rs62237509	Y	N	3	0.999992	6.20138	rs56286961	0.558278	3	20727350	A	G	0.0085206	0.00144148	3.397e-09	0.7351	1	RNU6-815P	snRNA	intergenic	7.95	7
40	p24.1 p22.1	rs6551129 rs6551129			3	1	1683.16	rs2271960	1	3	49878078	T	C	-0.0142302	0.00127785	8.36e-29	0.5472	1	TRAIP	protein_coding	intronic	1.828	1f	0.125104			Yes	Adult_Cortex:Fetal_Cortex
40	p24.1 p22.1	rs6551129 rs6551129			3	1	886.547	rs6807194	1	3	50236373	A	G	0.0138001	0.00137314	9.148e-24	0.3118	0.261478	GNAT1	protein_coding	intergenic	1.82	7	2.50523e-06			Yes	EP_links_oneway:Adult_Cortex:Fetal_Cortex
40	p24.1 p22.1	rs6551129 rs6551129			3	1	811.975	rs6446187	1	3	49907111	A	C	0.0139414	0.00127435	7.459e-28	0.4706	0.674714	CAMKV	protein_coding	intronic	9.891	4	0.996846	PsychENCODE_eQTLs:BRAINEAC/FCTX:BRAINEAC/aveALL:GTEx/v8/Brain_Cortex	+	Yes	Adult_Cortex:Fetal_Cortex
41	p22.1	rs2271961	Y	N	3	1	1408.42	rs13085679	1	3	49869631	A	G	0.0140969	0.00127736	2.563e-28	0.4549	0.987666	TRAIP	protein_coding	intronic	7.673	7	0.125104			Yes	Adult_Cortex:Fetal_Cortex
41	p22.1	rs2271961	Y	N	3	1	867.002	rs35275715	1	3	49959148	A	G	-0.0143149	0.00129959	3.249e-28	0.6022	0.477663	MON1A	protein_coding	intronic	3.488	6	0.00636811	eQTLGen_cis_eQTLs:GTEx/v8/Adrenal_Gland:GTEx/v8/Whole_Blood:GTEx/v8/Artery_Tibial	-	Yes	Adult_Cortex:Fetal_Cortex
41	p22.1	rs2271961	Y	N	3	1	551.312	rs62259947	1	3	49439924	T	C	-0.0105257	0.00148124	1.196e-12	0.7561	0.738145	RHOA	protein_coding	intronic	3.29	6	0.804698	GTEx/v8/Artery_Tibial:GTEx/v8/Muscle_Skeletal:GTEx/v8/Nerve_Tibial	+	Yes	Promoter_anchored_loops:Adult_Cortex:Fetal_Cortex
42	p14.3	rs13071861	Y	N	1	1	5.73515	rs13071861	0.230825	3	58371332	C	G	-0.00974971	0.00174757	2.418e-08	0.8428	1	PXK	protein_coding	intronic	2.372	7	0.932144	PsychENCODE_eQTLs:eQTLGen_cis_eQTLs:BIOSQTL/BIOS_eQTL_geneLevel:GTEx/v8/Adipose_Subcutaneous:GTEx/v8/Adipose_Visceral_Omentum:GTEx/v8/Adrenal_Gland:GTEx/v8/Whole_Blood:GTEx/v8/Artery_Aorta:GTEx/v8/Artery_Coronary:GTEx/v8/Artery_Tibial:GTEx/v8/Brain_Cerebellar_Hemisphere:GTEx/v8/Brain_Cerebellum:GTEx/v8/Muscle_Skeletal:GTEx/v8/Nerve_Tibial	+	No
43	p14.1	rs5849952	Y	N	3	1	335.195	rs4302345	1	3	78530022	A	G	-0.00790837	0.00133362	3.034e-09	0.35	0.810322	MRPS17P3	pseudogene	intergenic	0.455
43	p14.1	rs5849952	Y	N	3	1	181.225	rs11918489	1	3	70541784	T	C	0.0119334	0.00168242	1.311e-12	0.6701	0.97069	RP11-231I13.2	antisense	intergenic	1.431	6
43	p14.1	rs5849952	Y	N	3	1	111.177	rs9809844	0.548644	3	75103553	C	G	0.0083747	0.00151523	3.264e-08	0.2284	0.847567	NIPA2P2	pseudogene	intergenic	0.657	7
44	q13.12	rs638293	Y	N	3	1	292.148	rs683194	1	3	107299698	A	G	-0.00828456	0.00139871	3.17e-09	0.7078	0.876686	BBX	protein_coding	intronic	0.257	7	0.958098	eQTLGen_cis_eQTLs:BIOSQTL/BIOS_eQTL_geneLevel:GTEx/v8/Whole_Blood	+	No
44	q13.12	rs638293	Y	N	3	1	149.543	rs1648890	1	3	107285743	A	C	0.00960996	0.00174188	3.451e-08	0.2908	0.910992	BBX	protein_coding	intronic	5.518	7	0.958098	eQTLGen_cis_eQTLs:BIOSQTL/BIOS_eQTL_geneLevel:GTEx/v8/Whole_Blood	+	No
44	q13.12	rs638293	Y	N	3	1	91.0469	rs583593	1	3	107253001	A	G	0.00953294	0.00174118	4.377e-08	0.2912	0.906524	BBX	protein_coding	intronic	1.804		0.958098	eQTLGen_cis_eQTLs:BIOSQTL/BIOS_eQTL_geneLevel:GTEx/v8/Whole_Blood	+	No
45	q13.31	rs9837485	Y	Y	3	1	268.732	rs9837485	1	3	114106253	A	G	0.00724876	0.00127889	1.444e-08	0.5511	1	ZBTB20	protein_coding	ncRNA_intronic	4.174	7	0.982557	eQTLGen_cis_eQTLs:BIOSQTL/BIOS_eQTL_geneLevel:GTEx/v8/Muscle_Skeletal	+	No
45	q13.31	rs9837485	Y	Y	3	1	101.095	rs2722005	1	3	114097560	A	T	-0.00743524	0.00159966	3.359e-06	0.4261	0.722943			ncRNA_intronic	10.57	7
45	q13.31	rs9837485	Y	Y	3	1	81.9869	rs7626635	1	3	114089653	C	G	-0.0075303	0.00161145	2.968e-06	0.405	0.708045			ncRNA_intronic	0.79	4
46	q13.32	rs6438417	Y	N	3	1	678.77	rs17667088	1	3	117722101	A	G	-0.010046	0.00148918	1.515e-11	0.7599	0.994304	RP11-384F7.1	lincRNA	intergenic	16.52	6
46	q13.32	rs6438417	Y	N	3	1	357.981	rs1353914	0.5	3	117756940	T	C	0.0100683	0.00148939	1.384e-11	0.24	0.994304	RP11-384F7.1	lincRNA	ncRNA_intronic	3.426
46	q13.32	rs6438417	Y	N	3	1	323.98	rs6792102	1	3	117553543	A	C	0.00887592	0.00145126	9.589e-10	0.2594	0.855398	LSAMP	protein_coding	ncRNA_intronic	1.188	6	0.946284	GTEx/v8/Adrenal_Gland	-	No
47	q22.2	rs9852075	Y	N	3	1	858.952	rs17200216	1	3	136067232	A	C	0.0114521	0.00149388	1.773e-14	0.2379	0.889862	STAG1	protein_coding	intronic	7.553	7	1	eQTLGen_cis_eQTLs:BIOSQTL/BIOS_eQTL_geneLevel:BRAINEAC/WHMT	-	Yes	Adult_Cortex:Fetal_Cortex:Hippocampus
47	q22.2	rs9852075	Y	N	3	1	475.727	rs3905668	1	3	135931586	A	G	-0.0106232	0.00144357	1.86e-13	0.7363	0.7899	RP11-463H24.1	pseudogene	intergenic	4.248
47	q22.2	rs9852075	Y	N	3	1	383.955	rs4678452	1	3	136621717	A	C	-0.00823973	0.00137306	1.961e-09	0.3119	0.978044	NCK1	protein_coding	intronic	1.483	5	0.00103503	PsychENCODE_eQTLs:eQTLGen_cis_eQTLs:GTEx/v8/Brain_Caudate_basal_ganglia:GTEx/v8/Brain_Hypothalamus	+	No
48	q26.31	rs556464	Y	N	3	1	434.036	rs556464	1	3	173113680	C	G	-0.00787814	0.00127664	6.797e-10	0.4583	1	NLGN1	protein_coding	upstream	10.38	4	0.755798			No
48	q26.31	rs556464	Y	N	3	1	165.949	rs3752769	1	3	173114721	A	G	0.00726016	0.00127371	1.198e-08	0.5244	0.895863	NLGN1	protein_coding	intronic	12.36	4	0.755798			No
48	q26.31	rs556464	Y	N	3	1	143.124	rs3752768	1	3	173114686	A	T	0.00722732	0.00127399	1.405e-08	0.5265	0.899205	NLGN1	protein_coding	intronic	9.521	4	0.755798			No
49	q26.33	rs12696498	Y	N	3	1	574.779	rs639889	1	3	182589764	T	C	0.00834567	0.00134434	5.379e-10	0.6616	0.944901	ATP11B	protein_coding	intronic	1.407		0.992835	eQTLGen_cis_eQTLs:BIOSQTL/BIOS_eQTL_geneLevel:GTEx/v8/Adipose_Subcutaneous:GTEx/v8/Adipose_Visceral_Omentum:GTEx/v8/Adrenal_Gland:GTEx/v8/Cells_EBV-transformed_lymphocytes:GTEx/v8/Artery_Aorta:GTEx/v8/Artery_Coronary:GTEx/v8/Artery_Tibial:GTEx/v8/Brain_Cerebellar_Hemisphere:GTEx/v8/Muscle_Skeletal:GTEx/v8/Nerve_Tibial	+	No
49	q26.33	rs12696498	Y	N	3	1	302.409	rs9832401	1	3	182567400	A	G	-0.00819134	0.0013497	1.286e-09	0.333	0.940821	ATP11B	protein_coding	intronic	12.63	6	0.992835	eQTLGen_cis_eQTLs:BIOSQTL/BIOS_eQTL_geneLevel:GTEx/v8/Adipose_Subcutaneous:GTEx/v8/Adipose_Visceral_Omentum:GTEx/v8/Adrenal_Gland:GTEx/v8/Cells_EBV-transformed_lymphocytes:GTEx/v8/Artery_Aorta:GTEx/v8/Artery_Coronary:GTEx/v8/Artery_Tibial:GTEx/v8/Brain_Cerebellar_Hemisphere:GTEx/v8/Muscle_Skeletal:GTEx/v8/Nerve_Tibial	+	No
49	q26.33	rs12696498	Y	N	3	1	270.296	rs13067698	0.942638	3	182585500	T	G	-0.00838634	0.00135701	6.405e-10	0.326	0.990414	ATP11B	protein_coding	intronic	1.028	6	0.992835	eQTLGen_cis_eQTLs:BIOSQTL/BIOS_eQTL_geneLevel:GTEx/v8/Adipose_Subcutaneous:GTEx/v8/Adipose_Visceral_Omentum:GTEx/v8/Adrenal_Gland:GTEx/v8/Cells_EBV-transformed_lymphocytes:GTEx/v8/Artery_Aorta:GTEx/v8/Artery_Coronary:GTEx/v8/Artery_Tibial:GTEx/v8/Brain_Cerebellar_Hemisphere:GTEx/v8/Muscle_Skeletal:GTEx/v8/Nerve_Tibial	+	No
50	q29	rs145646459	Y	Y	3	1	190.125	rs145646459	0.999844	3	196937941	T	TTA	-0.0118837	0.00216225	3.884e-08	0.1532	1	DLG1	protein_coding	intronic	6.087		0.998742	eQTLGen_cis_eQTLs:BIOSQTL/BIOS_eQTL_geneLevel:GTEx/v8/Brain_Cerebellar_Hemisphere:GTEx/v8/Brain_Cerebellum:GTEx/v8/Muscle_Skeletal:GTEx/v8/Nerve_Tibial	-	No
50	q29	rs145646459	Y	Y	3	1	108.816	rs73208281	1	3	196823055	A	G	0.00863911	0.00170262	3.905e-07	0.8323	0.852793			intronic	0.854	6
50	q29	rs145646459	Y	Y	3	1	83.5448	rs9847229	0.992782	3	196815810	C	G	0.0096142	0.00182398	1.354e-07	0.8583	0.918476			intronic	0.637	5
51	p16.3	rs1475974	Y	N	3	1	681.665	rs12649553	1	4	2911761	A	T	-0.0098332	0.00138926	1.466e-12	0.2991	0.581197	ADD1	protein_coding	intronic	1.381	4	0.611299	eQTLGen_cis_eQTLs:BIOSQTL/BIOS_eQTL_geneLevel:GTEx/v8/Adipose_Subcutaneous:GTEx/v8/Adrenal_Gland:GTEx/v8/Whole_Blood:GTEx/v8/Nerve_Tibial	-	No
51	p16.3	rs1475974	Y	N	3	1	361.891	rs2471338	1	4	2994107	T	G	0.0100416	0.00133995	6.659e-14	0.657	0.931857	GRK4	protein_coding	intronic	2.044		5.69042e-07	PsychENCODE_eQTLs:eQTLGen_cis_eQTLs:BIOSQTL/BIOS_eQTL_geneLevel:GTEx/v8/Adipose_Subcutaneous:GTEx/v8/Adipose_Visceral_Omentum:GTEx/v8/Adrenal_Gland:GTEx/v8/Whole_Blood:GTEx/v8/Artery_Aorta:GTEx/v8/Artery_Coronary:GTEx/v8/Artery_Tibial:GTEx/v8/Brain_Anterior_cingulate_cortex_BA24:GTEx/v8/Brain_Caudate_basal_ganglia:GTEx/v8/Brain_Cerebellar_Hemisphere:GTEx/v8/Brain_Cerebellum:GTEx/v8/Brain_Cortex:G…	+	No
51	p16.3	rs1475974	Y	N	3	1	335.363	rs2960295	1	4	2976638	T	C	0.00875912	0.00128151	8.207e-12	0.5602	0.687567	GRK4	protein_coding	intronic	3.932		5.69042e-07	PsychENCODE_eQTLs:eQTLGen_cis_eQTLs:BIOSQTL/BIOS_eQTL_geneLevel:GTEx/v8/Adipose_Subcutaneous:GTEx/v8/Adipose_Visceral_Omentum:GTEx/v8/Adrenal_Gland:GTEx/v8/Whole_Blood:GTEx/v8/Artery_Aorta:GTEx/v8/Artery_Coronary:GTEx/v8/Artery_Tibial:GTEx/v8/Brain_Anterior_cingulate_cortex_BA24:GTEx/v8/Brain_Caudate_basal_ganglia:GTEx/v8/Brain_Cerebellar_Hemisphere:GTEx/v8/Brain_Cerebellum:GTEx/v8/Brain_Cortex:G…	+	No
52	p15.2	rs34811474	Y	N	3	0.99999	259.056	rs12512541	0.975442	4	28360964	A	C	0.00802833	0.00142346	1.703e-08	0.2757	0.860535	RP11-180C1.1	protein_coding	intergenic	0.021	7				No
52	p15.2	rs34811474	Y	N	3	0.99999	252.471	rs13139194	1	4	28359687	A	C	-0.0080141	0.00142346	1.806e-08	0.7243	0.860535	RP11-180C1.1	protein_coding	intergenic	4.608	4				No
52	p15.2	rs34811474	Y	N	3	0.99999	6.67856	rs138739216	0.140276	4	25355782	A	AAAG	-0.0108071	0.00191683	1.725e-08	0.2177	0.673258	ZCCHC4	protein_coding	intronic	7.197		3.21958e-05	GTEx/v8/Adipose_Subcutaneous:GTEx/v8/Adrenal_Gland:GTEx/v8/Cells_EBV-transformed_lymphocytes:GTEx/v8/Whole_Blood:GTEx/v8/Brain_Cerebellar_Hemisphere:GTEx/v8/Brain_Cerebellum:GTEx/v8/Muscle_Skeletal	+	No
53	p15.1	rs66944385	Y	Y	2	1	268.837	rs6823966	1	4	34252534	A	G	0.0133647	0.00233935	1.11e-08	0.0804	0.987425	RP11-548L20.1	lincRNA	ncRNA_intronic	1.938	5
53	p15.1	rs66944385	Y	Y	2	1	268.682	rs6836755	0.639476	4	34257748	A	G	-0.0134004	0.00234068	1.035e-08	0.9197	1	RP11-548L20.1	lincRNA	ncRNA_intronic	10.17	7
54	p14	rs13102095	Y	Y	1	1	5.40773	rs13102095	0.336985	4	38626522	T	C	-0.00732537	0.00133504	4.09e-08	0.3484	1	RP11-617D20.1	antisense	ncRNA_exonic	13.37	7
55	q12	rs12505880	Y	N	2	1	19.7856	rs13134752	0.548694	4	56408511	A	T	-0.00894239	0.00161853	3.291e-08	0.6359	0.804975	CLOCK	protein_coding	intronic	0.018	6	0.99848	eQTLGen_cis_eQTLs:BIOSQTL/BIOS_eQTL_geneLevel:GTEx/v8/Adipose_Subcutaneous:GTEx/v8/Adrenal_Gland:GTEx/v8/Cells_EBV-transformed_lymphocytes:GTEx/v8/Whole_Blood:GTEx/v8/Artery_Aorta:GTEx/v8/Artery_Tibial:GTEx/v8/Muscle_Skeletal:GTEx/v8/Nerve_Tibial	+	No
55	q12	rs12505880	Y	N	2	1	19.7819	rs55762320	0.565699	4	56422214	T	TTTTTG	0.00896376	0.00162123	3.217e-08	0.3613	0.799326	PDCL2	protein_coding	downstream	0.834		0.0413603			No
56	q13.1	rs55776420	Y	Y	3	0.999962	7.64902	rs55776420	0.796149	4	62887838	T	TA	0.0107841	0.00188468	1.05e-08	0.1311	1	LPHN3	protein_coding	intronic	0.165		0.999993			No
56	q13.1	rs55776420	Y	Y	3	0.999962	5.88194	rs7695892	1	4	62765438	T	C	-0.00704887	0.00127305	3.079e-08	0.5183	1	LPHN3	protein_coding	intronic	0.542	7	0.999993			No
56	q13.1	rs55776420	Y	Y	3	0.999962	5.4888	rs13122283	0.370897	4	62993563	A	G	-0.00719837	0.00129958	3.035e-08	0.3979	1	RP11-84A1.3	antisense	ncRNA_intronic	10.53	7
57	q13.2	rs17087844	Y	N	3	1	285.049	rs11131666	0.958929	4	67863307	T	G	0.00803522	0.00127929	3.363e-10	0.4474	0.940591	RNU6-699P	snRNA	intergenic	5.436	5
57	q13.2	rs17087844	Y	N	3	1	277.753	rs17087844	1	4	67863736	T	C	-0.00821947	0.0012777	1.252e-10	0.5464	1	RNU6-699P	snRNA	intergenic	0.178	5
57	q13.2	rs17087844	Y	N	3	1	17.6243	rs2217823	0.456952	4	67877865	C	G	-0.00801219	0.00127929	3.771e-10	0.5526	0.940591	RNU6-699P	snRNA	intergenic	1.96	7
58	q21.21	rs71662898	Y	Y	2	1	87.7552	rs71662898	0.833784	4	81147550	A	ATTTTCT	-0.00795857	0.0013464	3.402e-09	0.3363	1	PRDM8	protein_coding	intergenic	1.642			eQTLGen_cis_eQTLs:BIOSQTL/BIOS_eQTL_geneLevel:GTEx/v8/Adipose_Visceral_Omentum:GTEx/v8/Brain_Cerebellum:GTEx/v8/Brain_Cortex:GTEx/v8/Brain_Frontal_Cortex_BA9:GTEx/v8/Brain_Putamen_basal_ganglia:GTEx/v8/Muscle_Skeletal:GTEx/v8/Nerve_Tibial	+	No
58	q21.21	rs71662898	Y	Y	2	1	87.4435	rs1379701	1	4	81146332	A	G	0.00765293	0.00134309	1.212e-08	0.6603	1	PRDM8	protein_coding	intergenic	5.45	4		eQTLGen_cis_eQTLs:BIOSQTL/BIOS_eQTL_geneLevel:GTEx/v8/Adipose_Visceral_Omentum:GTEx/v8/Brain_Cerebellum:GTEx/v8/Brain_Cortex:GTEx/v8/Brain_Frontal_Cortex_BA9:GTEx/v8/Brain_Putamen_basal_ganglia:GTEx/v8/Muscle_Skeletal:GTEx/v8/Nerve_Tibial	+	No
59	q24	rs13107325	Y	N	3	1	663.091	rs13107325	1	4	103188709	T	C	0.0248834	0.00273685	9.679e-20	0.0573	1	SLC39A8	protein_coding	exonic	23.1	5	0.891567	eQTLGen_cis_eQTLs:BIOSQTL/BIOS_eQTL_geneLevel:GTEx/v8/Brain_Frontal_Cortex_BA9:GTEx/v8/Muscle_Skeletal	+	No
59	q24	rs13107325	Y	N	3	1	627.674	rs13135092	1	4	103198082	A	G	-0.0229184	0.0026337	3.267e-18	0.9378	0.92726	SLC39A8	protein_coding	intronic	10.31	6	0.891567	eQTLGen_cis_eQTLs:BIOSQTL/BIOS_eQTL_geneLevel:GTEx/v8/Brain_Frontal_Cortex_BA9:GTEx/v8/Muscle_Skeletal	+	No
59	q24	rs13107325	Y	N	3	1	35.5424	rs13105682	1	4	102702364	T	G	-0.0199124	0.00319673	4.697e-10	0.9587	0.463705	BANK1	protein_coding	intronic	3.926	7	1.76433e-10	eQTLGen_trans_eQTLs	+	No
60	q25	rs3934797	Y	N	3	1	132.11	rs79532211	1	4	112396533	A	G	0.00979579	0.00189144	2.227e-07	0.87	0.661606			intergenic	5.095	5
60	q25	rs3934797	Y	N	3	1	81.872	rs11729080	1	4	112503872	A	G	-0.00937991	0.00174803	8.072e-08	0.1571	0.864277			intergenic	2.045	6
60	q25	rs3934797	Y	N	3	1	50.8457	rs72678859	1	4	112406961	T	C	-0.0094567	0.00175579	7.21e-08	0.1554	0.856848			intergenic	0.144	5
61	q28.2	rs72516830	Y	N	3	1	295.947	rs56267640	0.968756	4	130243888	CAAACA	C	0.0101112	0.00155629	8.187e-11	0.212	0.947748	RP11-419L4.1	lincRNA	intergenic	11.03
61	q28.2	rs72516830	Y	N	3	1	275.497	rs995637	1	4	130364383	A	G	-0.00711992	0.00128914	3.333e-08	0.5808	0.165811	RP11-419L4.1	lincRNA	intergenic	3.174
61	q28.2	rs72516830	Y	N	3	1	18.4528	rs4975211	0.866463	4	130241934	T	C	-0.0104728	0.00154808	1.33e-11	0.7849	1	RP11-419L4.1	lincRNA	intergenic	0.387	6
62	q31.1	rs12505942	Y	N	3	1	357.014	rs6536603	1	4	140886506	A	G	-0.0111719	0.00167695	2.702e-11	0.3342	0.8546	MAML3	protein_coding	intronic	3.597	6	0.329895	eQTLGen_cis_eQTLs:BIOSQTL/BIOS_eQTL_geneLevel:GTEx/v8/Whole_Blood	-	No
62	q31.1	rs12505942	Y	N	3	1	285.52	rs10016848	1	4	140853533	A	G	0.00895601	0.00159558	1.987e-08	0.4351	0.192072	MAML3	protein_coding	intronic	1.253	7	0.329895	eQTLGen_cis_eQTLs:BIOSQTL/BIOS_eQTL_geneLevel:GTEx/v8/Whole_Blood	-	No
62	q31.1	rs12505942	Y	N	3	1	73.3743	rs12505942	1	4	140906390	T	C	0.0138862	0.00134257	4.494e-25	0.6598	1	MAML3	protein_coding	intronic	2.756	5	0.329895	eQTLGen_cis_eQTLs:BIOSQTL/BIOS_eQTL_geneLevel:GTEx/v8/Whole_Blood	-	No
63	q32.1	rs1354252	Y	Y	3	0.99999	114.222	rs6839982	1	4	160475754	T	C	-0.00641606	0.00127252	4.595e-07	0.5113	0.170778			intergenic	0.085	6
63	q32.1	rs1354252	Y	Y	3	0.99999	111.848	rs4340759	1	4	160488892	A	G	0.00646019	0.00127244	3.844e-07	0.4902	0.167742			intergenic	3.344	7
63	q32.1	rs1354252	Y	Y	3	0.99999	6.46886	rs6856295	0.222094	4	160488360	A	G	0.00647027	0.00127242	3.667e-07	0.4906	0.167742			intergenic	0.861	7
64	p15.31	rs17813430	Y	Y	3	1	355.966	rs17207543	0.993207	5	7388622	T	G	0.00984945	0.00153132	1.256e-10	0.7783	0.909508	ADCY2	protein_coding	intergenic	1.238	6	0.999995	GTEx/v8/Artery_Tibial	+	No
64	p15.31	rs17813430	Y	Y	3	1	312.47	rs6866171	1	5	7416007	A	C	-0.00992345	0.00153305	9.634e-11	0.221	0.988361	ADCY2	protein_coding	intronic	2.042	5	0.999995	GTEx/v8/Artery_Tibial	+	No
64	p15.31	rs17813430	Y	Y	3	1	45.69	rs112058676	1	5	7409142	T	C	-0.00990696	0.0015343	1.071e-10	0.2205	0.965534	ADCY2	protein_coding	intronic	6.495	7	0.999995	GTEx/v8/Artery_Tibial	+	No
65	p15.2	rs17239989	Y	Y	1	1	6.12798	rs17239989	0.178174	5	13013974	A	C	-0.00757307	0.00132512	1.098e-08	0.3601	1	RP11-419C19.2	lincRNA	ncRNA_intronic	0.136	6
66	p13.3	rs56070621	Y	N	3	1	461.567	rs2066928	1	5	30843787	A	G	-0.0119798	0.00158254	3.725e-14	0.4877	0.501602	RPL19P11	pseudogene	intergenic	15.14
66	p13.3	rs56070621	Y	N	3	1	364.911	rs2178487	1	5	30843788	A	T	0.0128366	0.00159203	7.432e-16	0.5559	0.577044	RPL19P11	pseudogene	intergenic	14.64	6
66	p13.3	rs56070621	Y	N	3	1	98.8136	rs4502841	1	5	30863015	A	G	0.0113297	0.00158281	8.21e-13	0.5153	0.302248	RPL19P11	pseudogene	intergenic	1.81	7
67	p12	rs145678215	Y	Y	2	1	115.531	rs4267876	0.750102	5	45116967	A	G	0.0100363	0.00174757	9.303e-09	0.8428	0.992914	RP11-357F12.1	lincRNA	intergenic	0.714	7
67	p12	rs145678215	Y	Y	2	1	115.103	rs1472584	0.930594	5	45210282	A	G	-0.00976841	0.00174218	2.058e-08	0.1584	0.971716	HCN1	protein_coding	intergenic	9.423		0.953139	GTEx/v8/Adipose_Subcutaneous:GTEx/v8/Muscle_Skeletal	-	No
68	q11.2	rs62359143	Y	N	3	1	68.0263	rs13175618	0.999107	5	57232003	A	G	0.00764649	0.00132544	7.979e-09	0.6403	0.701434	RP11-478P10.1	lincRNA	intergenic	3.162	7
68	q11.2	rs62359143	Y	N	3	1	27.2417	rs62359143	0.964038	5	57242700	T	C	-0.0086643	0.00143615	1.61e-09	0.268	1	RP11-478P10.1	lincRNA	intergenic	3.059	7
68	q11.2	rs62359143	Y	N	3	1	24.5252	rs6450450	1	5	57260835	T	C	-0.00752477	0.00135777	2.988e-08	0.3253	0.633884	RP11-478P10.1	lincRNA	intergenic	2.22	7
69	q14.3	rs112161672	Y	N	3	1	466.432	rs151017858	1	5	93340732	A	G	-0.0160775	0.00227404	1.548e-12	0.1357	0.926964	FAM172A	protein_coding	intronic	0.806	6	0.0182871	PsychENCODE_eQTLs:eQTLGen_cis_eQTLs:GTEx/v8/Artery_Tibial	-	No
69	q14.3	rs112161672	Y	N	3	1	267.945	rs60548086	1	5	92397594	T	G	0.00916238	0.00139564	5.196e-11	0.7056	0.995102	CTD-2091N23.1	lincRNA	ncRNA_intronic	1.071	6
69	q14.3	rs112161672	Y	N	3	1	204.82	rs2578487	1	5	92382252	T	G	0.00909083	0.00139195	6.512e-11	0.7029	0.995101	CTD-2091N23.1	lincRNA	ncRNA_intronic	2.161	7
70	q21.2	rs34073570	Y	N	3	1	239.376	rs76025409	1	5	103783801	C	G	0.00907242	0.00165706	4.378e-08	0.3513	0.334671	RP11-6N13.1	lincRNA	ncRNA_intronic	0.342	6
70	q21.2	rs34073570	Y	N	3	1	202.356	rs325481	1	5	104000752	A	G	-0.00919	0.00162167	1.457e-08	0.6098	0.411814	RP11-6N13.1	lincRNA	ncRNA_intronic	6.004
70	q21.2	rs34073570	Y	N	3	1	38.2169	rs325501	0.986989	5	104007433	C	G	-0.00946623	0.00161982	5.083e-09	0.6073	0.403357	RP11-6N13.1	lincRNA	ncRNA_intronic	0.907	7
71	q21.3	rs10065099	Y	N	3	1	407.96	rs4392673	0.999844	5	109070953	T	G	-0.0077545	0.00142914	5.779e-08	0.2722	0.929377			intronic	1.215	7
71	q21.3	rs10065099	Y	N	3	1	251.878	rs11745926	1	5	109145190	T	C	0.00778831	0.00143062	5.208e-08	0.7287	0.958573			intronic	1.664	7
71	q21.3	rs10065099	Y	N	3	1	173.712	rs11748408	1	5	109012276	T	C	0.0165246	0.00327285	4.435e-07	0.9377	0.170473			intergenic	9.505	6
72	q22.3	rs41236	Y	N	3	1	219.297	rs62379173	1	5	113765331	A	G	-0.00951785	0.00204114	3.119e-06	0.109
72	q22.3	rs41236	Y	N	3	1	200.614	rs2974455	0.946184	5	113402383	T	C	0.00878663	0.00173821	4.296e-07	0.2929
72	q22.3	rs41236	Y	N	3	1	29.4517	rs62378430	0.999998	5	113746948	T	G	0.00942853	0.00202895	3.362e-06	0.8895
73	q23.1	rs2122194	Y	N	3	1	568.017	rs17429749	1	5	120014865	C	G	0.00986591	0.00172813	1.135e-08	0.1616	0.341929	PRR16	protein_coding	intronic	9.209	5	0.526199	PsychENCODE_eQTLs	+	No
73	q23.1	rs2122194	Y	N	3	1	340.274	rs7734839	0.913293	5	120079467	T	C	-0.0107858	0.00137608	4.578e-15	0.6906	0.990668	RNU4-69P	snRNA	intergenic	4.019	7
73	q23.1	rs2122194	Y	N	3	1	240.408	rs17443405	1	5	120053028	T	C	-0.0112255	0.00141933	2.588e-15	0.7217	0.849685	RNU4-69P	snRNA	intergenic	3.07	7
74	q31.1	rs35096828	Y	N	3	1	502.107	rs34981024	1	5	133899351	A	G	0.0111965	0.00142994	4.879e-15	0.7283	0.990175	JADE2	protein_coding	intronic	6.383	5	0.99931	eQTLGen_cis_eQTLs:BIOSQTL/BIOS_eQTL_geneLevel:GTEx/v8/Adipose_Visceral_Omentum	-	No
74	q31.1	rs35096828	Y	N	3	1	484.198	rs2044318	1	5	133902288	T	C	-0.0111255	0.00143094	7.554e-15	0.2711	0.985306	JADE2	protein_coding	intronic	3.361	5	0.99931	eQTLGen_cis_eQTLs:BIOSQTL/BIOS_eQTL_geneLevel:GTEx/v8/Adipose_Visceral_Omentum	-	No
74	q31.1	rs35096828	Y	N	3	1	23.2077	rs6891328	0.708888	5	133851526	C	G	-0.00877266	0.00129946	1.471e-11	0.6019	0.201643	RN7SL541P	misc_RNA	intergenic	4.074	5
75	q31.3	rs246039	Y	Y	3	1	386.582	rs246057	0.999985	5	140325583	A	G	-0.00806954	0.0012722	2.258e-10	0.4986	0.76932	PCDHA1	protein_coding	intronic	11.82		0.000559475	BRAINEAC/WHMT:GTEx/v8/Brain_Cerebellar_Hemisphere:GTEx/v8/Brain_Cerebellum	+	No
75	q31.3	rs246039	Y	Y	3	1	318.048	rs550475	1	5	140273528	C	G	0.00823621	0.0012722	9.546e-11	0.4983	0.749815	PCDHA1	protein_coding	intronic	0.265	6	0.000559475	BRAINEAC/WHMT:GTEx/v8/Brain_Cerebellar_Hemisphere:GTEx/v8/Brain_Cerebellum	+	No
75	q31.3	rs246039	Y	Y	3	1	48.7868	rs246012	1	5	140336277	T	C	0.00795634	0.0012722	4.012e-10	0.4982	0.772375	PCDHA1	protein_coding	intronic	12.55		0.000559475	BRAINEAC/WHMT:GTEx/v8/Brain_Cerebellar_Hemisphere:GTEx/v8/Brain_Cerebellum	+	No
76	q33.2	rs2963998	Y	N	3	1	379.844	rs7731282	1	5	153239976	T	G	0.0112471	0.00187921	2.168e-09	0.132	0.195982	AC091962.3	lincRNA	intergenic	2.522	7
76	q33.2	rs2963998	Y	N	3	1	320.786	rs2964026	1	5	153162394	A	G	-0.0089026	0.00127563	2.966e-12	0.5367	1	GRIA1	protein_coding	intronic	1.087	4	0.999436	GTEx/v8/Brain_Nucleus_accumbens_basal_ganglia	+	No
76	q33.2	rs2963998	Y	N	3	1	60.4147	rs35156413	1	5	153360261	CTG	C	-0.0110161	0.00189704	6.352e-09	0.8709	0.126569	FAM114A2	protein_coding	intergenic	7.435		3.0787e-07	PsychENCODE_eQTLs:eQTLGen_cis_eQTLs:BIOSQTL/BIOS_eQTL_geneLevel:GTEx/v8/Adipose_Subcutaneous:GTEx/v8/Brain_Putamen_basal_ganglia	-	No
77	q34	rs62381583	Y	N	2	0.999996	7.74342	rs17522604	0.161223	5	160942725	T	C	-0.00895589	0.00147495	1.264e-09	0.247	1	GABRB2	protein_coding	intronic	2.551	6	0.940299			No
77	q34	rs62381583	Y	N	2	0.999996	7.19457	rs6881515	0.518143	5	160911968	T	C	0.00878815	0.00146959	2.233e-09	0.7503	1	GABRB2	protein_coding	intronic	0.433	6	0.940299			No
78	q34	rs34772405	Y	N	3	1	144.782	rs11134697	1	5	170820316	A	G	-0.00972231	0.00158861	9.372e-10	0.5453	0.983725	NPM1	protein_coding	intronic	1.837	1d	0.959044			No
78	q34	rs34772405	Y	N	3	1	109.457	rs10060619	1	5	170429074	T	C	0.0074199	0.00135227	4.095e-08	0.6695	0.990818	RANBP17	protein_coding	intronic	0.76	7	8.61018e-36	PsychENCODE_eQTLs:eQTLGen_cis_eQTLs:BIOSQTL/BIOS_eQTL_geneLevel:GTEx/v8/Adipose_Subcutaneous:GTEx/v8/Adipose_Visceral_Omentum:GTEx/v8/Artery_Aorta:GTEx/v8/Artery_Tibial:GTEx/v8/Brain_Amygdala:GTEx/v8/Brain_Caudate_basal_ganglia:GTEx/v8/Brain_Cerebellar_Hemisphere:GTEx/v8/Brain_Cerebellum:GTEx/v8/Brain_Cortex:GTEx/v8/Brain_Hippocampus:GTEx/v8/Brain_Nucleus_accumbens_basal_ganglia:GTEx/v8/Brain_Put…	+	No
78	q34	rs34772405	Y	N	3	1	35.2069	rs11741392	1	5	170332782	T	C	0.00746756	0.00135331	3.42e-08	0.6705	0.995391	RANBP17	protein_coding	intronic	3.498	6	8.61018e-36	PsychENCODE_eQTLs:eQTLGen_cis_eQTLs:BIOSQTL/BIOS_eQTL_geneLevel:GTEx/v8/Adipose_Subcutaneous:GTEx/v8/Adipose_Visceral_Omentum:GTEx/v8/Artery_Aorta:GTEx/v8/Artery_Tibial:GTEx/v8/Brain_Amygdala:GTEx/v8/Brain_Caudate_basal_ganglia:GTEx/v8/Brain_Cerebellar_Hemisphere:GTEx/v8/Brain_Cerebellum:GTEx/v8/Brain_Cortex:GTEx/v8/Brain_Hippocampus:GTEx/v8/Brain_Nucleus_accumbens_basal_ganglia:GTEx/v8/Brain_Put…	+	No
79	q35.2	rs1966265	Y	N	3	1	30.0737	rs67334206	1	5	176378981	C	G	-0.00750323	0.00161499	3.381e-06	0.808	0.230342			intronic	1.348	7
79	q35.2	rs1966265	Y	N	3	1	27.3356	rs2011077	1	5	176521456	T	C	0.00817483	0.00150605	5.692e-08	0.2324	0.99327			intronic	7.504	4
79	q35.2	rs1966265	Y	N	3	1	9.07354	rs1966265	0.940339	5	176516631	A	G	0.00823903	0.00150402	4.297e-08	0.2333	1	FGFR4	protein_coding	exonic	6.204	5	1.30017e-06	PsychENCODE_eQTLs:eQTLGen_cis_eQTLs:BIOSQTL/BIOS_eQTL_geneLevel:GTEx/v8/Adipose_Subcutaneous:GTEx/v8/Adipose_Visceral_Omentum:GTEx/v8/Whole_Blood:GTEx/v8/Artery_Tibial:GTEx/v8/Brain_Cerebellar_Hemisphere:GTEx/v8/Brain_Cerebellum:GTEx/v8/Brain_Cortex:GTEx/v8/Brain_Frontal_Cortex_BA9:GTEx/v8/Brain_Hippocampus:GTEx/v8/Brain_Nucleus_accumbens_basal_ganglia:GTEx/v8/Nerve_Tibial	+	No
80	p24.1	rs12202891	Y	N	3	1	292.94	rs7753800	0.695284	6	12006926	A	T	-0.0114559	0.00196028	5.109e-09	0.8804	0.955964	RP11-456H18.2	lincRNA	upstream	3.751	5
80	p24.1	rs12202891	Y	N	3	1	105.593	rs62395444	0.542569	6	11972254	T	C	0.0113844	0.00192206	3.163e-09	0.1252	1	RP11-456H18.1	antisense	intergenic	2.792	5
80	p24.1	rs12202891	Y	N	3	1	33.7315	rs9462329	0.999959	6	11976703	A	T	0.0112012	0.00196099	1.115e-08	0.1195	0.929627	RP11-456H18.1	antisense	intergenic	3.586	5
81	p22.3	rs34292681	Y	Y	1	1	5.95478	rs34292681	0.200317	6	17014588	A	G	-0.0087426	0.00154627	1.566e-08	0.2158	1	STMND1	protein_coding	intergenic	0.539	7
82	p22.2	rs2113864070	Y	N	3	1	582.718	rs2237235	1	6	26391395	A	G	0.0107732	0.00180364	2.33e-09	0.7401	1	BTN2A2	protein_coding	UTR3	11.26	6	0.000150288	eQTLGen_cis_eQTLs:BIOSQTL/BIOS_eQTL_geneLevel:GTEx/v8/Adipose_Subcutaneous:GTEx/v8/Adipose_Visceral_Omentum:GTEx/v8/Artery_Aorta:GTEx/v8/Artery_Coronary:GTEx/v8/Artery_Tibial:GTEx/v8/Brain_Anterior_cingulate_cortex_BA24:GTEx/v8/Brain_Caudate_basal_ganglia:GTEx/v8/Brain_Cortex:GTEx/v8/Brain_Hypothalamus:GTEx/v8/Brain_Nucleus_accumbens_basal_ganglia:GTEx/v8/Brain_Putamen_basal_ganglia:GTEx/v8/Muscl…	+	No
82	p22.2	rs2113864070	Y	N	3	1	301.35	rs10484400	0.999983	6	27670917	T	C	-0.0126021	0.00203785	6.23e-10	0.8906	0.865059	RP1-97D16.1	pseudogene	intergenic	3.646	6
82	p22.2	rs2113864070	Y	N	3	1	290.416	rs16867983	1	6	27732240	C	G	-0.013289	0.00214928	6.299e-10	0.903	0.937567	RSL24D1P1	pseudogene	intergenic	3.19	5
83	p21.32	rs9296130	Y	N	3	1	1040.83	rs9462022	0.988672	6	34761684	A	G	-0.00974576	0.0013502	5.281e-13	0.6675	0.374697	UHRF1BP1	protein_coding	intronic	5.752	6	2.46541e-07	PsychENCODE_eQTLs:eQTLGen_cis_eQTLs:BIOSQTL/BIOS_eQTL_geneLevel:GTEx/v8/Adipose_Subcutaneous:GTEx/v8/Adipose_Visceral_Omentum:GTEx/v8/Adrenal_Gland:GTEx/v8/Cells_EBV-transformed_lymphocytes:GTEx/v8/Whole_Blood:GTEx/v8/Artery_Aorta:GTEx/v8/Artery_Coronary:GTEx/v8/Artery_Tibial:GTEx/v8/Brain_Amygdala:GTEx/v8/Brain_Anterior_cingulate_cortex_BA24:GTEx/v8/Brain_Caudate_basal_ganglia:GTEx/v8/Brain_Cere…	+	Yes	Promoter_anchored_loops
83	p21.32	rs9296130	Y	N	3	1	564.745	rs7755822	1	6	34722282	T	G	0.0157071	0.00164679	1.462e-21	0.1825	0.99244	SNRPC	protein_coding	intergenic	1.583	7	0.727262	PsychENCODE_eQTLs:eQTLGen_cis_eQTLs:BIOSQTL/BIOS_eQTL_geneLevel:GTEx/v8/Adipose_Subcutaneous:GTEx/v8/Adipose_Visceral_Omentum:GTEx/v8/Adrenal_Gland:GTEx/v8/Whole_Blood:GTEx/v8/Artery_Aorta:GTEx/v8/Artery_Tibial:GTEx/v8/Brain_Amygdala:GTEx/v8/Brain_Anterior_cingulate_cortex_BA24:GTEx/v8/Brain_Caudate_basal_ganglia:GTEx/v8/Brain_Cerebellum:GTEx/v8/Brain_Cortex:GTEx/v8/Brain_Frontal_Cortex_BA9:GTEx/…	-	Yes	Promoter_anchored_loops
83	p21.32	rs9296130	Y	N	3	1	477.673	rs148024643	1	6	34731649	A	G	0.0117583	0.00142715	1.73e-16	0.2734	0.482998	SNRPC	protein_coding	intronic	1.068	7	0.727262	PsychENCODE_eQTLs:eQTLGen_cis_eQTLs:BIOSQTL/BIOS_eQTL_geneLevel:GTEx/v8/Adipose_Subcutaneous:GTEx/v8/Adipose_Visceral_Omentum:GTEx/v8/Adrenal_Gland:GTEx/v8/Whole_Blood:GTEx/v8/Artery_Aorta:GTEx/v8/Artery_Tibial:GTEx/v8/Brain_Amygdala:GTEx/v8/Brain_Anterior_cingulate_cortex_BA24:GTEx/v8/Brain_Caudate_basal_ganglia:GTEx/v8/Brain_Cerebellum:GTEx/v8/Brain_Cortex:GTEx/v8/Brain_Frontal_Cortex_BA9:GTEx/…	-	Yes	Promoter_anchored_loops
84	p21.1	rs11444709	Y	N	3	1	151.532	rs12662201	1	6	43131136	A	G	0.0107856	0.00190524	1.504e-08	0.1278	1	PTK7	protein_coding	intergenic	1.746	7	0.975879	PsychENCODE_eQTLs:eQTLGen_cis_eQTLs:BIOSQTL/BIOS_eQTL_geneLevel:GTEx/v8/Adipose_Subcutaneous:GTEx/v8/Whole_Blood:GTEx/v8/Artery_Aorta:GTEx/v8/Artery_Coronary:GTEx/v8/Artery_Tibial:GTEx/v8/Brain_Cerebellum:GTEx/v8/Brain_Cortex:GTEx/v8/Brain_Spinal_cord_cervical_c-1:GTEx/v8/Muscle_Skeletal:GTEx/v8/Nerve_Tibial	+	Yes	Promoter_anchored_loops
84	p21.1	rs11444709	Y	N	3	1	114.166	rs11967948	1	6	43132792	T	C	-0.0110448	0.00190461	6.663e-09	0.8721	1	PTK7	protein_coding	intergenic	0.962	5	0.975879	PsychENCODE_eQTLs:eQTLGen_cis_eQTLs:BIOSQTL/BIOS_eQTL_geneLevel:GTEx/v8/Adipose_Subcutaneous:GTEx/v8/Whole_Blood:GTEx/v8/Artery_Aorta:GTEx/v8/Artery_Coronary:GTEx/v8/Artery_Tibial:GTEx/v8/Brain_Cerebellum:GTEx/v8/Brain_Cortex:GTEx/v8/Brain_Spinal_cord_cervical_c-1:GTEx/v8/Muscle_Skeletal:GTEx/v8/Nerve_Tibial	+	Yes	Promoter_anchored_loops
84	p21.1	rs11444709	Y	N	3	1	40.6331	rs11967116	1	6	43133020	A	G	-0.0107905	0.00191423	1.729e-08	0.8736	0.978671	PTK7	protein_coding	intergenic	1.27	6	0.975879	PsychENCODE_eQTLs:eQTLGen_cis_eQTLs:BIOSQTL/BIOS_eQTL_geneLevel:GTEx/v8/Adipose_Subcutaneous:GTEx/v8/Whole_Blood:GTEx/v8/Artery_Aorta:GTEx/v8/Artery_Coronary:GTEx/v8/Artery_Tibial:GTEx/v8/Brain_Cerebellum:GTEx/v8/Brain_Cortex:GTEx/v8/Brain_Spinal_cord_cervical_c-1:GTEx/v8/Muscle_Skeletal:GTEx/v8/Nerve_Tibial	+	Yes	Promoter_anchored_loops
85	q12	rs56016894	Y	N	2	1	297.38	rs56016894	1	6	69610898	A	T	-0.0121471	0.00198418	9.26e-10	0.8837	1	BAI3	protein_coding	intronic	1.651	6
85	q12	rs56016894	Y	N	2	1	296.486	rs71750095	1	6	69602083	T	TCTAAA	0.0115386	0.00199768	7.637e-09	0.1145	0.960427	BAI3	protein_coding	intronic	2.393
86	q13	rs9352202	Y	N	3	1	252.211	rs4380723	1	6	76048141	A	G	0.00651085	0.00136039	1.705e-06	0.6771	0.632167			intronic	10.54	6
86	q13	rs9352202	Y	N	3	1	174.3	rs6902022	1	6	76038328	A	C	-0.00662492	0.00135952	1.099e-06	0.3237	0.649057			intronic	1.786	7
86	q13	rs9352202	Y	N	3	1	77.5136	rs2998391	1	6	76145070	T	C	-0.00611399	0.00132481	3.922e-06	0.3605	0.576304			intronic	0.483
87	q14.2	rs12193842	Y	N	3	1	369.941	rs217290	1	6	84398565	T	C	-0.00815768	0.00127883	1.784e-10	0.4491	0.376084	SNAP91	protein_coding	intronic	0.403	6	0.974351	PsychENCODE_eQTLs:GTEx/v8/Artery_Aorta	-	No
87	q14.2	rs12193842	Y	N	3	1	316.45	rs35157273	1	6	84339296	A	G	0.00965814	0.00148518	7.864e-11	0.242	0.662153	SNAP91	protein_coding	intronic	2.655	7	0.974351	PsychENCODE_eQTLs:GTEx/v8/Artery_Aorta	-	No
87	q14.2	rs12193842	Y	N	3	1	29.0916	rs91894	1	6	84387905	C	G	0.00816876	0.00127897	1.692e-10	0.5514	0.374578	SNAP91	protein_coding	intronic	1.28	5	0.974351	PsychENCODE_eQTLs:GTEx/v8/Artery_Aorta	-	No
88	q16.1	rs12524320	Y	Y	3	1	513.05	rs1601855	1	6	94617609	T	C	0.00859055	0.00127855	1.828e-11	0.5498	0.963734	RP11-524K14.1	lincRNA	intergenic	1.715
88	q16.1	rs12524320	Y	Y	3	1	326.937	rs1463677	1	6	94650604	T	C	-0.00871915	0.00127847	9.076e-12	0.4505	1	RP11-524K14.1	lincRNA	intergenic	2.764	5
88	q16.1	rs12524320	Y	Y	3	1	188.231	rs12528499	1	6	94623839	A	G	-0.0086509	0.00127802	1.294e-11	0.4523	0.963734	RP11-524K14.1	lincRNA	intergenic	0.137	7
89	q16.3	rs9480737	Y	Y	3	1	117.658	rs4946651	0.998344	6	105369510	A	G	-0.00777302	0.00127993	1.252e-09	0.4451	0.995961	LINC00577	lincRNA	intergenic	4.601	7
89	q16.3	rs9480737	Y	Y	3	1	84.7858	rs72935795	0.999998	6	107441735	A	T	0.0086263	0.00135103	1.717e-10	0.6683	0.990828	BEND3	protein_coding	intergenic	8.974	6	0.498329	eQTLGen_cis_eQTLs:BIOSQTL/BIOS_eQTL_geneLevel:GTEx/v8/Whole_Blood:GTEx/v8/Artery_Tibial	-	No
89	q16.3	rs9480737	Y	Y	3	1	20.1492	rs1475120	0.85571	6	105389953	A	G	0.00776995	0.00127985	1.272e-09	0.5546	1	LINC00577	lincRNA	intergenic	1.463
90	q21	rs697642	Y	N	3	1	304.695	rs73544123	0.818965	6	112086884	T	C	0.0185128	0.00292415	2.441e-10	0.0498	0.565471	FYN	protein_coding	intronic	3.011	5	0.995636	PsychENCODE_eQTLs:eQTLGen_cis_eQTLs:BIOSQTL/BIOS_eQTL_geneLevel:GTEx/v8/Brain_Caudate_basal_ganglia:GTEx/v8/Brain_Nucleus_accumbens_basal_ganglia	-	Yes	Promoter_anchored_loops:Hippocampus
90	q21	rs697642	Y	N	3	1	218.32	rs706895	1	6	112041359	T	C	-0.00948285	0.00155177	9.876e-10	0.7863	0.316323	FYN	protein_coding	intronic	0.882	5	0.995636	PsychENCODE_eQTLs:eQTLGen_cis_eQTLs:BIOSQTL/BIOS_eQTL_geneLevel:GTEx/v8/Brain_Caudate_basal_ganglia:GTEx/v8/Brain_Nucleus_accumbens_basal_ganglia	-	Yes	Promoter_anchored_loops:Hippocampus
90	q21	rs697642	Y	N	3	1	84.9396	rs6568702	0.999209	6	112065620	T	C	-0.0182435	0.00288071	2.405e-10	0.9486	0.599072	FYN	protein_coding	intronic	8.327	5	0.995636	PsychENCODE_eQTLs:eQTLGen_cis_eQTLs:BIOSQTL/BIOS_eQTL_geneLevel:GTEx/v8/Brain_Caudate_basal_ganglia:GTEx/v8/Brain_Nucleus_accumbens_basal_ganglia	-	Yes	Promoter_anchored_loops:Hippocampus
91	q22.32	rs1490384	Y	Y	3	1	396.848	rs9398808	1	6	126758791	T	G	-0.00781481	0.00127881	9.885e-10	0.4492	0.866151	MIR588	miRNA	intergenic	8.816	6
91	q22.32	rs1490384	Y	Y	3	1	301.737	rs4053271	0.924366	6	126830512	T	C	0.0078765	0.00127865	7.295e-10	0.5502	0.866151	MIR588	miRNA	intergenic	6.815
91	q22.32	rs1490384	Y	Y	3	1	81.1272	rs9375608	0.588171	6	129346357	T	C	0.008763	0.00138261	2.325e-10	0.6958	1	LAMA2	protein_coding	intronic	0.92	6	1.18465e-24	BRAINEAC/OCTX		No
92	q24.3	rs12199557	Y	Y	1	1	5.84622	rs12199557	0.101785	6	147972241	T	C	-0.00699511	0.00127253	3.87e-08	0.5115	1	SAMD5	protein_coding	intronic	6.611	5	0.000898004	PsychENCODE_eQTLs:GTEx/v8/Adipose_Visceral_Omentum:GTEx/v8/Brain_Cerebellar_Hemisphere:GTEx/v8/Brain_Cerebellum:GTEx/v8/Brain_Hypothalamus	-	No
93	q25.1	rs4870063	Y	N	3	1	446.584	rs4870063	1	6	152244647	A	C	-0.0109957	0.00133282	1.589e-16	0.6491	1	ESR1	protein_coding	intronic	9.39	7	0.987167			No
93	q25.1	rs4870063	Y	N	3	1	302.58	rs4371852	1	6	152242900	T	G	0.0105939	0.00136361	7.887e-15	0.32	0.898754	ESR1	protein_coding	intronic	2.618	7	0.987167			No
93	q25.1	rs4870063	Y	N	3	1	157.401	rs6927072	1	6	152257687	T	G	0.0109794	0.00133343	1.816e-16	0.3502	1	ESR1	protein_coding	intronic	5.952	7	0.987167			No
94	q26	rs370097730	Y	N	3	1	573.815	rs1893537	1	6	163122220	T	G	-0.0094795	0.00150899	3.335e-10	0.7689	0.89905	PARK2	protein_coding	intronic	3.132	5	0.0218088			Yes	Adult_Cortex:Fetal_Cortex
94	q26	rs370097730	Y	N	3	1	309.93	rs10945852	0.992644	6	163030233	A	C	0.00905836	0.00152935	3.168e-09	0.2225	0.866662	PARK2	protein_coding	intronic	0.985	7	0.0218088			Yes	Adult_Cortex:Fetal_Cortex
94	q26	rs370097730	Y	N	3	1	273.334	rs4360108	1	6	163092298	T	C	0.00954734	0.00150922	2.52e-10	0.231	0.893818	PARK2	protein_coding	intronic	2.951	6	0.0218088			Yes	Adult_Cortex:Fetal_Cortex
95	p22.3	rs138324521	Y	N	3	1	648.075	rs2141821	1	7	3531275	T	C	-0.00770632	0.00137958	2.324e-08	0.3066	0.22624	SDK1	protein_coding	intronic	5.965	5	0.005016	PsychENCODE_eQTLs:eQTLGen_cis_eQTLs:BIOSQTL/BIOS_eQTL_geneLevel:GTEx/v8/Adipose_Subcutaneous:GTEx/v8/Adipose_Visceral_Omentum:GTEx/v8/Whole_Blood:GTEx/v8/Artery_Tibial:GTEx/v8/Brain_Nucleus_accumbens_basal_ganglia:GTEx/v8/Muscle_Skeletal:GTEx/v8/Nerve_Tibial	-	No
95	p22.3	rs138324521	Y	N	3	1	489.007	rs11770612	1	7	1915493	A	C	0.0147702	0.00156414	3.607e-21	0.7909	0.89918	MAD1L1	protein_coding	intronic	4.071	4	2.03781e-10	eQTLGen_cis_eQTLs:BIOSQTL/BIOS_eQTL_geneLevel:GTEx/v8/Whole_Blood	+	No
95	p22.3	rs138324521	Y	N	3	1	183.129	rs6462231	1	7	3727379	A	G	0.0106073	0.00173862	1.053e-09	0.8408	0.208965	SDK1	protein_coding	intronic	0.271	4	0.005016	PsychENCODE_eQTLs:eQTLGen_cis_eQTLs:BIOSQTL/BIOS_eQTL_geneLevel:GTEx/v8/Adipose_Subcutaneous:GTEx/v8/Adipose_Visceral_Omentum:GTEx/v8/Whole_Blood:GTEx/v8/Artery_Tibial:GTEx/v8/Brain_Nucleus_accumbens_basal_ganglia:GTEx/v8/Muscle_Skeletal:GTEx/v8/Nerve_Tibial	-	No
96	p21.3	rs59700575	Y	Y	1	1	5.76151	rs59700575	0.236272	7	13691252	A	G	-0.00764903	0.0013659	2.139e-08	0.682	1	AC011288.2	lincRNA	ncRNA_intronic	9.22	7
97	p15.3	rs28541530	Y	N	3	1	487.204	rs10269168	1	7	21503566	C	G	0.0114233	0.001646	3.915e-12	0.362	0.822582	SP4	protein_coding	intronic	0.237	5	0.951288	eQTLGen_cis_eQTLs:BIOSQTL/BIOS_eQTL_geneLevel:GTEx/v8/Adipose_Visceral_Omentum:GTEx/v8/Artery_Aorta:GTEx/v8/Artery_Tibial:GTEx/v8/Brain_Nucleus_accumbens_basal_ganglia:GTEx/v8/Nerve_Tibial	+	No
97	p15.3	rs28541530	Y	N	3	1	327.892	rs6461568	1	7	21524635	T	C	-0.0110843	0.00164749	1.72e-11	0.6395	0.844718	SP4	protein_coding	intronic	1.464	7	0.951288	eQTLGen_cis_eQTLs:BIOSQTL/BIOS_eQTL_geneLevel:GTEx/v8/Adipose_Visceral_Omentum:GTEx/v8/Artery_Aorta:GTEx/v8/Artery_Tibial:GTEx/v8/Brain_Nucleus_accumbens_basal_ganglia:GTEx/v8/Nerve_Tibial	+	No
97	p15.3	rs28541530	Y	N	3	1	161.839	rs9639378	0.999976	7	21479009	T	C	-0.0112943	0.00163378	4.759e-12	0.6248	0.806312	SP4	protein_coding	intronic	1.742	6	0.951288	eQTLGen_cis_eQTLs:BIOSQTL/BIOS_eQTL_geneLevel:GTEx/v8/Adipose_Visceral_Omentum:GTEx/v8/Artery_Aorta:GTEx/v8/Artery_Tibial:GTEx/v8/Brain_Nucleus_accumbens_basal_ganglia:GTEx/v8/Nerve_Tibial	+	No
98	p15.2	rs7779546	Y	N	3	0.999985	32.2368	rs7779546	1	7	28126159	T	C	-0.0136896	0.00248001	3.393e-08	0.9292	1	JAZF1	protein_coding	intronic	7.58	3a	0.958302	PsychENCODE_eQTLs:eQTLGen_cis_eQTLs	+	No
98	p15.2	rs7779546	Y	N	3	0.999985	30.6985	rs508347	0.82514	7	28212824	T	C	0.00695051	0.00136821	3.773e-07	0.316
98	p15.2	rs7779546	Y	N	3	0.999985	5.63538	rs6963763	0.919044	7	28126077	A	G	0.0135735	0.00247196	4.003e-08	0.0713	1	JAZF1	protein_coding	intronic	14.57	4	0.958302	PsychENCODE_eQTLs:eQTLGen_cis_eQTLs	+	No
99	p14.3	rs10233473	Y	Y	3	1	228.971	rs10233473	0.768488	7	32265007	T	C	0.0112077	0.00187827	2.415e-09	0.2305	1	PDE1C	protein_coding	intronic	2.454	5	0.000270704	BIOSQTL/BIOS_eQTL_geneLevel:GTEx/v8/Nerve_Tibial	+	No
99	p14.3	rs10233473	Y	Y	3	1	204.486	rs9639646	1	7	32280243	A	G	-0.0103264	0.00184104	2.04e-08	0.7557	0.927455	PDE1C	protein_coding	intronic	7.333	6	0.000270704	BIOSQTL/BIOS_eQTL_geneLevel:GTEx/v8/Nerve_Tibial	+	No
99	p14.3	rs10233473	Y	Y	3	1	24.6644	rs11764155	1	7	32272112	C	G	-0.0102937	0.00184079	2.248e-08	0.7556	0.921535	PDE1C	protein_coding	intronic	1.402	7	0.000270704	BIOSQTL/BIOS_eQTL_geneLevel:GTEx/v8/Nerve_Tibial	+	No
100	p13	rs10275309	Y	N	3	1	413.257	rs12702071	1	7	44302370	A	G	-0.00726857	0.00145604	5.985e-07	0.7432	0.69022			intronic	0.084	5
100	p13	rs10275309	Y	N	3	1	218.944	rs10250265	1	7	44321062	T	C	0.00751525	0.00142523	1.339e-07	0.2746	0.940817			intronic	1.88	5
100	p13	rs10275309	Y	N	3	1	200.867	rs10252113	1	7	44316488	A	C	0.00759233	0.00143279	1.163e-07	0.27	0.921436			intronic	3.583	5
101	p12.2	rs2661876	Y	N	3	0.999997	34.4532	rs6961340	1	7	49857860	A	T	-0.00626937	0.00159323	8.322e-05	0.441	0.615059			intronic	2.001	7
101	p12.2	rs2661876	Y	N	3	0.999997	33.3139	rs2661876	1	7	49874533	A	C	0.00720394	0.00130957	3.786e-08	0.6186	1	VWC2	protein_coding	intronic	4.771	7
101	p12.2	rs2661876	Y	N	3	0.999997	7.65152	rs12333649	0.70772	7	49827987	T	C	0.00681963	0.001723	7.552e-05	0.1628
102	q11.22	rs75141388	Y	Y	3	1	546.165	rs142285204	1	7	71612643	T	C	0.0176424	0.00272134	8.985e-11	0.942	0.75448	CALN1	protein_coding	intronic	0.711	6	0.15365			No
102	q11.22	rs75141388	Y	Y	3	1	347.424	rs11769084	1	7	71828688	A	G	-0.0191879	0.00282424	1.091e-11	0.0536	0.722763	CALN1	protein_coding	intronic	0.758	5	0.15365			No
102	q11.22	rs75141388	Y	Y	3	1	197.3	rs10255669	1	7	69786742	T	C	-0.0160192	0.00292695	4.416e-08	0.9503	0.663758	AUTS2	protein_coding	intronic	0.952	5	0.996187	eQTLGen_cis_eQTLs	+	No
103	q21.11	rs4730347	Y	Y	3	1	282.36	rs10279625	1	7	78115537	A	T	-0.0103692	0.00152041	9.13e-12	0.2262	0.255182	MAGI2	protein_coding	intronic	5.296	7	0.883174	GTEx/v8/Artery_Tibial:GTEx/v8/Brain_Caudate_basal_ganglia:GTEx/v8/Brain_Cortex:GTEx/v8/Brain_Nucleus_accumbens_basal_ganglia:GTEx/v8/Brain_Putamen_basal_ganglia	+	No
103	q21.11	rs4730347	Y	Y	3	1	243.288	rs10485896	1	7	78103473	A	G	0.00968638	0.00169698	1.14e-08	0.8309	0.16341	MAGI2	protein_coding	intronic	5.812	4	0.883174	GTEx/v8/Artery_Tibial:GTEx/v8/Brain_Caudate_basal_ganglia:GTEx/v8/Brain_Cortex:GTEx/v8/Brain_Nucleus_accumbens_basal_ganglia:GTEx/v8/Brain_Putamen_basal_ganglia	+	No
103	q21.11	rs4730347	Y	Y	3	1	39.022	rs6466258	0.996892	7	78143956	A	T	0.00818335	0.00128205	1.731e-10	0.5619	0.666994	MAGI2	protein_coding	intronic	13.45	7	0.883174	GTEx/v8/Artery_Tibial:GTEx/v8/Brain_Caudate_basal_ganglia:GTEx/v8/Brain_Cortex:GTEx/v8/Brain_Nucleus_accumbens_basal_ganglia:GTEx/v8/Brain_Putamen_basal_ganglia	+	No
104	q21.11	rs71117513	Y	N	3	0.992989	8.4355	rs71117513	0.999859	7	86261480	T	TA	-0.00908285	0.00163067	2.553e-08	0.648	1	GRM3	protein_coding	intergenic	11.84		0.98471	PsychENCODE_eQTLs:GTEx/v8/Brain_Cerebellum	-	No
104	q21.11	rs71117513	Y	N	3	0.992989	6.40806	rs802463	0.995514	7	86261977	A	G	0.00614128	0.00132298	3.447e-06	0.3628	0.995821			intergenic	11.62	6
104	q21.11	rs71117513	Y	N	3	0.992989	3.33551	rs62488001	0.377802	7	86319761	A	T	-0.00903422	0.00196055	4.065e-06	0.7953	0.56877			intronic	1.923	6
105	q21.3	rs4236530	Y	N	3	1	656.643	rs10262388	1	7	95857300	T	C	0.0105631	0.00132503	1.567e-15	0.3602	1	SLC25A13	protein_coding	intronic	10.46	5	1.94046e-15	eQTLGen_cis_eQTLs:BIOSQTL/BIOS_eQTL_geneLevel:GTEx/v8/Whole_Blood:GTEx/v8/Brain_Cerebellar_Hemisphere:GTEx/v8/Brain_Cerebellum:GTEx/v8/Muscle_Skeletal	+	Yes	Adult_Cortex:Fetal_Cortex
105	q21.3	rs4236530	Y	N	3	1	386.825	rs3779487	1	7	95801906	A	G	-0.0103973	0.00131995	3.357e-15	0.6333	0.964379	SLC25A13	protein_coding	intronic	0.045	7	1.94046e-15	eQTLGen_cis_eQTLs:BIOSQTL/BIOS_eQTL_geneLevel:GTEx/v8/Whole_Blood:GTEx/v8/Brain_Cerebellar_Hemisphere:GTEx/v8/Brain_Cerebellum:GTEx/v8/Muscle_Skeletal	+	Yes	Adult_Cortex:Fetal_Cortex
105	q21.3	rs4236530	Y	N	3	1	272.104	rs6974235	1	7	95726175	T	G	-0.008853	0.00158259	2.214e-08	0.4874	0.298514	DYNC1I1	protein_coding	intronic	0.421	6	0.0116377	GTEx/v8/Brain_Cerebellar_Hemisphere:GTEx/v8/Brain_Cerebellum:GTEx/v8/Muscle_Skeletal	+	No
106	q31.1	rs12672452	Y	Y	3	1	214.333	rs10278004	1	7	109157038	A	G	0.00814164	0.00128033	2.031e-10	0.4437	0.995782	AC073071.1	lincRNA	intergenic	0.122	7
106	q31.1	rs12672452	Y	Y	3	1	185.619	rs58683261	1	7	109132039	T	G	-0.00796897	0.00127708	4.384e-10	0.5437	0.893007	AC073071.1	lincRNA	intergenic	1.763	7
106	q31.1	rs12672452	Y	Y	3	1	39.6469	rs1721447	0.999964	7	109214139	T	G	-0.00729904	0.00127717	1.098e-08	0.5441	0.569685	AC073071.1	lincRNA	ncRNA_intronic	1.642
107	q31.1	rs2040658	Y	N	3	1	1113.39	rs12705960	1	7	114015707	A	C	-0.0141748	0.00127254	8.14e-29	0.5124	0.662	FOXP2	protein_coding	intronic	1.01	6	0.996179	PsychENCODE_eQTLs:GTEx/v8/Adipose_Subcutaneous:GTEx/v8/Adrenal_Gland	-	Yes	Fetal_Cortex
107	q31.1	rs2040658	Y	N	3	1	905.546	rs2040658	1	7	114138751	C	G	0.0145677	0.00128883	1.273e-29	0.5802	1	FOXP2	protein_coding	intronic	1.027	6	0.996179	PsychENCODE_eQTLs:GTEx/v8/Adipose_Subcutaneous:GTEx/v8/Adrenal_Gland	-	Yes	Fetal_Cortex
107	q31.1	rs2040658	Y	N	3	1	156.164	rs1852470	1	7	114027269	T	G	0.0142597	0.00127364	4.264e-29	0.4758	0.621476	FOXP2	protein_coding	intronic	1.586	5	0.996179	PsychENCODE_eQTLs:GTEx/v8/Adipose_Subcutaneous:GTEx/v8/Adrenal_Gland	-	Yes	Fetal_Cortex
108	q31.32	rs3757540	Y	N	3	1	585.478	rs11773731	1	7	121965058	A	G	-0.00824919	0.00131315	3.344e-10	0.6239	1	CADPS2	protein_coding	intronic	7.041	7	0.997779	GTEx/v8/Artery_Aorta:GTEx/v8/Nerve_Tibial	+	No
108	q31.32	rs3757540	Y	N	3	1	300.529	rs1443749	0.518217	7	121960438	T	C	0.00825139	0.00131287	3.285e-10	0.3765	0.995714	CADPS2	protein_coding	intronic	0.591	5	0.997779	GTEx/v8/Artery_Aorta:GTEx/v8/Nerve_Tibial	+	No
108	q31.32	rs3757540	Y	N	3	1	300.439	rs11766895	1	7	121965082	A	G	0.0082505	0.00131315	3.329e-10	0.3761	1	CADPS2	protein_coding	intronic	5.949	7	0.997779	GTEx/v8/Artery_Aorta:GTEx/v8/Nerve_Tibial	+	No
109	q31.33	rs10487502	Y	N	3	1	458.306	rs17718395	1	7	127378652	A	G	0.014043	0.00251127	2.243e-08	0.1117	0.964505	SND1	protein_coding	intronic	3.662	5	0.999917	eQTLGen_cis_eQTLs:BIOSQTL/BIOS_eQTL_geneLevel:GTEx/v8/Adipose_Subcutaneous:GTEx/v8/Adipose_Visceral_Omentum:GTEx/v8/Artery_Aorta:GTEx/v8/Artery_Coronary:GTEx/v8/Artery_Tibial:GTEx/v8/Brain_Amygdala:GTEx/v8/Brain_Caudate_basal_ganglia:GTEx/v8/Brain_Cerebellar_Hemisphere:GTEx/v8/Brain_Cortex:GTEx/v8/Brain_Hippocampus:GTEx/v8/Brain_Putamen_basal_ganglia:GTEx/v8/Brain_Spinal_cord_cervical_c-1:GTEx/v8…	+	No
109	q31.33	rs10487502	Y	N	3	1	208.789	rs10487502	1	7	127600378	T	C	-0.0094596	0.00149891	2.768e-10	0.2356	1	SND1	protein_coding	intronic	11.72	7	0.999917	eQTLGen_cis_eQTLs:BIOSQTL/BIOS_eQTL_geneLevel:GTEx/v8/Adipose_Subcutaneous:GTEx/v8/Adipose_Visceral_Omentum:GTEx/v8/Artery_Aorta:GTEx/v8/Artery_Coronary:GTEx/v8/Artery_Tibial:GTEx/v8/Brain_Amygdala:GTEx/v8/Brain_Caudate_basal_ganglia:GTEx/v8/Brain_Cerebellar_Hemisphere:GTEx/v8/Brain_Cortex:GTEx/v8/Brain_Hippocampus:GTEx/v8/Brain_Putamen_basal_ganglia:GTEx/v8/Brain_Spinal_cord_cervical_c-1:GTEx/v8…	+	No
109	q31.33	rs10487502	Y	N	3	1	178.337	rs6963614	1	7	127594304	T	C	-0.0143807	0.00249189	7.873e-09	0.8863	0.940979	SND1	protein_coding	intronic	6.512	2b	0.999917	eQTLGen_cis_eQTLs:BIOSQTL/BIOS_eQTL_geneLevel:GTEx/v8/Adipose_Subcutaneous:GTEx/v8/Adipose_Visceral_Omentum:GTEx/v8/Artery_Aorta:GTEx/v8/Artery_Coronary:GTEx/v8/Artery_Tibial:GTEx/v8/Brain_Amygdala:GTEx/v8/Brain_Caudate_basal_ganglia:GTEx/v8/Brain_Cerebellar_Hemisphere:GTEx/v8/Brain_Cortex:GTEx/v8/Brain_Hippocampus:GTEx/v8/Brain_Putamen_basal_ganglia:GTEx/v8/Brain_Spinal_cord_cervical_c-1:GTEx/v8…	+	No
110	q34	rs79453306	Y	N	3	1	1044.59	rs111862082	1	7	140178554	T	C	-0.0138257	0.00145014	1.52e-21	0.26	0.985074	MKRN1	protein_coding	UTR5	6.798	4	0.979424	PsychENCODE_eQTLs	-	No
110	q34	rs79453306	Y	N	3	1	735.989	rs79453306	1	7	140173170	A	G	0.0139608	0.00145123	6.606e-22	0.7406	1	MKRN1	protein_coding	intronic	5.32	7	0.979424	PsychENCODE_eQTLs	-	No
110	q34	rs79453306	Y	N	3	1	317.618	rs12216582	0.995137	7	140125361	C	G	0.0120379	0.00140368	9.821e-18	0.7113	0.812673	RAB19	protein_coding	intronic	0.308	6
111	q35	rs10081335	Y	Y	3	1	337.213	rs1916942	1	7	146613869	A	T	0.0090065	0.00159492	1.635e-08	0.5633	0.737832	CNTNAP2	protein_coding	intronic	1.182	7	3.82883e-05			No
111	q35	rs10081335	Y	Y	3	1	103.261	rs11983087	1	7	146646459	T	C	-0.00918215	0.00159773	9.072e-09	0.4302	0.797204	CNTNAP2	protein_coding	intronic	1.861	5	3.82883e-05			No
111	q35	rs10081335	Y	Y	3	1	83.282	rs12703867	1	7	146660788	T	G	-0.00871315	0.00129026	1.445e-11	0.4166	0.807134	CNTNAP2	protein_coding	intronic	0.033	7	3.82883e-05			No
112	q36.3	rs7802866	Y	N	3	1	69.9115	rs56036340	0.999999	7	157706942	A	G	-0.0122642	0.00244844	5.472e-07	0.8816	0.263823			intronic	0.266	7
112	q36.3	rs7802866	Y	N	3	1	62.5791	rs56303020	0.999929	7	157729065	A	G	0.00950329	0.00204021	3.197e-06	0.1843	0.354218			intronic	1.334	7
112	q36.3	rs7802866	Y	N	3	1	14.0539	rs7802866	1	7	157689081	A	G	0.00913588	0.00167446	4.878e-08	0.1749	1	PTPRN2	protein_coding	intronic	0.413	5
113	p23.1	rs7461062	Y	N	3	1	310.114	rs7016561	1	8	9580493	T	C	-0.00803006	0.00140312	1.046e-08	0.7109	0.159545	TNKS	protein_coding	intronic	2.264	7	0.777116	PsychENCODE_eQTLs:eQTLGen_cis_eQTLs:GTEx/v8/Brain_Hippocampus:GTEx/v8/Brain_Nucleus_accumbens_basal_ganglia:GTEx/v8/Brain_Putamen_basal_ganglia:GTEx/v8/Brain_Spinal_cord_cervical_c-1:GTEx/v8/Nerve_Tibial	-	No
113	p23.1	rs7461062	Y	N	3	1	153.608	rs2979217	1	8	8189084	A	G	0.0101921	0.00175212	5.991e-09	0.1562	0.149529	SGK223	protein_coding	intronic	2.663	3a	5.12369e-20	eQTLGen_cis_eQTLs:BIOSQTL/BIOS_eQTL_geneLevel	+	No
113	p23.1	rs7461062	Y	N	3	1	146.264	rs6601344	1	8	9548145	A	G	0.00752767	0.00133612	1.759e-08	0.3472	0.196894	TNKS	protein_coding	intronic	3.171	7	0.777116	PsychENCODE_eQTLs:eQTLGen_cis_eQTLs:GTEx/v8/Brain_Hippocampus:GTEx/v8/Brain_Nucleus_accumbens_basal_ganglia:GTEx/v8/Brain_Putamen_basal_ganglia:GTEx/v8/Brain_Spinal_cord_cervical_c-1:GTEx/v8/Nerve_Tibial	-	No
114	p12	rs76947678	Y	Y	1	0.99884	6.45787	rs76947678	0.0971608	8	36452534	A	G	0.0126174	0.00219548	9.093e-09	0.0925	1	RP11-962G15.1	lincRNA	ncRNA_intronic	0.27	7
115	q12.3	rs2011689	Y	N	3	0.999932	120.268	rs964436	0.353308	8	66228793	A	C	-0.00901352	0.0015791	1.146e-08	0.7962	1	RP11-678D18.1	pseudogene	intergenic	3.212
115	q12.3	rs2011689	Y	N	3	0.999932	120.186	rs12546130	0.574225	8	66227163	A	G	0.00901352	0.0015791	1.141e-08	0.2038	1	RP11-678D18.1	pseudogene	intergenic	0.578	7
115	q12.3	rs2011689	Y	N	3	0.999932	5.6621	rs10109545	0.587747	8	66266131	A	C	-0.0088455	0.00156226	1.499e-08	0.7902	0.88837	RP11-678D18.1	pseudogene	intergenic	3.823	6
116	q21.11	rs78864863	Y	Y	3	1	408.931	rs78864863	0.99439	8	76645780	A	T	0.0187163	0.00341913	4.393e-08	0.0359	1	AC016194.1	miRNA	intergenic	0.885	7
116	q21.11	rs78864863	Y	Y	3	1	212.801	rs80322571	0.508771	8	76584978	A	G	-0.0175283	0.00336113	1.835e-07	0.9628	0.948907			intergenic	0.872	6
116	q21.11	rs78864863	Y	Y	3	1	202.103	rs57858194	1	8	76743281	A	G	-0.016195	0.00327767	7.791e-07	0.9608	0.896497			intergenic	4.296	5
117	q21.3	rs5893143	Y	Y	1	1	6.55598	rs763099270	0.104718	8	91922449	T	TATC	0.00986703	0.00169916	6.354e-09	0.286	0.953091	NECAB1	protein_coding	intronic	1.203		0.377812	GTEx/v8/Adipose_Subcutaneous:GTEx/v8/Artery_Aorta	-	No
118	q22.1	rs34358161	Y	N	3	1	586.279	rs9642927	1	8	95613642	T	C	0.00779453	0.0013324	4.925e-09	0.6486	0.982358	RP11-267M23.7	pseudogene	intergenic	2.464	4
118	q22.1	rs34358161	Y	N	3	1	300.33	rs67127950	1	8	95612174	T	TTAAA	-0.0105117	0.00167064	3.131e-10	0.3192	0.995574	RP11-267M23.7	pseudogene	intergenic	9.741
118	q22.1	rs34358161	Y	N	3	1	300.112	rs72674881	1	8	95614104	T	C	-0.00777105	0.00133249	5.486e-09	0.3513	0.982358	RP11-267M23.7	pseudogene	intergenic	1.653	7
119	q22.3	rs10098039	Y	N	3	1	225.838	rs10108728	1	8	106238481	A	C	0.00672836	0.00132058	3.492e-07	0.6341	0.270919			intronic	3.44	7
119	q22.3	rs10098039	Y	N	3	1	219.266	rs2256236	1	8	106243818	C	G	-0.00915134	0.00172342	1.096e-07	0.1627	0.952989			intronic	1.381	3a
119	q22.3	rs10098039	Y	N	3	1	10.076	rs146092219	0.704343	8	106239592	T	TTAA	-0.00905744	0.00172556	1.527e-07	0.1622	0.937639			intronic	3.409
120	q23.3	rs57603195	Y	Y	3	1	271.365	rs903947	0.999997	8	115558465	C	G	-0.00817375	0.0013099	4.37e-10	0.6191	1	RP11-393K19.1	pseudogene	intergenic	1.327	7
120	q23.3	rs57603195	Y	Y	3	1	191.443	rs10955725	1	8	115706328	A	C	0.00773896	0.00131839	4.362e-09	0.3688	0.817037	RP11-192P9.1	pseudogene	intergenic	1.895	7
120	q23.3	rs57603195	Y	Y	3	1	78.997	rs9642825	0.995241	8	115487251	T	G	0.00898332	0.00151899	3.339e-09	0.2268	0.527322	RP11-393K19.1	pseudogene	intergenic	2.102	7
121	q24.3	rs59918340	Y	N	3	1	315.71	rs35066418	1	8	142214873	T	C	0.00977003	0.00163817	2.458e-09	0.185	0.275155	SLC45A4	protein_coding	intergenic	0.314	5	0.00458961	eQTLGen_cis_eQTLs:BIOSQTL/BIOS_eQTL_geneLevel:GTEx/v8/Adipose_Subcutaneous:GTEx/v8/Adipose_Visceral_Omentum:GTEx/v8/Artery_Tibial:GTEx/v8/Nerve_Tibial	-	Yes	Fetal_Cortex
121	q24.3	rs59918340	Y	N	3	1	165.743	rs59918340	1	8	142232256	A	G	-0.0103454	0.00127281	4.377e-16	0.5158	1	SLC45A4	protein_coding	intronic	2.221	4	0.00458961	eQTLGen_cis_eQTLs:BIOSQTL/BIOS_eQTL_geneLevel:GTEx/v8/Adipose_Subcutaneous:GTEx/v8/Adipose_Visceral_Omentum:GTEx/v8/Artery_Tibial:GTEx/v8/Nerve_Tibial	-	Yes	Fetal_Cortex
121	q24.3	rs59918340	Y	N	3	1	110.678	rs3739235	1	8	142229145	A	G	-0.00953974	0.00129528	1.767e-13	0.406	0.614189	SLC45A4	protein_coding	intronic	0.421		0.00458961	eQTLGen_cis_eQTLs:BIOSQTL/BIOS_eQTL_geneLevel:GTEx/v8/Adipose_Subcutaneous:GTEx/v8/Adipose_Visceral_Omentum:GTEx/v8/Artery_Tibial:GTEx/v8/Nerve_Tibial	-	Yes	Fetal_Cortex
122	p23	rs10959640	Y	Y	3	0.999993	138.429	rs1358921	1	9	10522476	A	G	-0.00698069	0.00127269	4.13e-08	0.4861	0.991874	PTPRD	protein_coding	intronic	1.253	7	1			No
122	p23	rs10959640	Y	Y	3	0.999993	138.391	rs10756059	1	9	10522652	A	C	0.00695971	0.00127258	4.524e-08	0.5122	0.991874	PTPRD	protein_coding	intronic	1.719	7	1			No
122	p23	rs10959640	Y	Y	3	0.999993	6.45756	rs9298667	0.612646	9	11228608	A	G	0.00770857	0.00127225	1.367e-09	0.4952	0.835928	RP11-23D5.1	lincRNA	intergenic	3.393	7
123	p21.3	rs10966547	Y	Y	1	1	5.57717	rs10966547	0.224071	9	24898113	A	G	0.00922503	0.00167484	3.625e-08	0.1748	1	RMRPP5	misc_RNA	intergenic	1.607	7
124	p21.1	rs13288673	Y	N	3	1	564.087	rs1413174	1	9	31245966	A	T	-0.00841965	0.00135648	5.413e-10	0.3265	0.848149	SLC25A6P2	pseudogene	intergenic	3.751	7
124	p21.1	rs13288673	Y	N	3	1	310.41	rs7860503	0.871537	9	31229023	A	G	0.00799901	0.00133495	2.077e-09	0.6515	0.804136	SLC25A6P2	pseudogene	intergenic	0.765	7
124	p21.1	rs13288673	Y	N	3	1	257.798	rs1333615	1	9	31237213	A	G	0.00847873	0.00135573	3.994e-10	0.6728	0.848149	SLC25A6P2	pseudogene	intergenic	8.994	5
125	q21.2	rs11145538	Y	Y	3	1	227.915	rs11790609	1	9	80301163	A	G	0.0066804	0.00139524	1.687e-06	0.7053	0.957146			intergenic	2.038	6
125	q21.2	rs11145538	Y	Y	3	1	101.218	rs7039088	0.999976	9	80337403	C	G	-0.00700685	0.00139773	5.369e-07	0.2929	0.929144			intronic	0.47	5
125	q21.2	rs11145538	Y	Y	3	1	51.438	rs72498506	1	9	80301468	A	G	-0.00678321	0.00139774	1.217e-06	0.2929	0.93848			intergenic	3.641	7
126	q22.31	rs2895249	Y	N	3	1	586.862	rs10761241	1	9	96368536	T	C	-0.0106136	0.00130085	3.384e-16	0.3956	0.979343	PHF2	protein_coding	intronic	0.625	7	0.994132	eQTLGen_cis_eQTLs	-	No
126	q22.31	rs2895249	Y	N	3	1	467.62	rs10761242	0.978754	9	96368656	T	C	0.0104683	0.00130074	8.426e-16	0.6042	0.975262	PHF2	protein_coding	intronic	4.407	6	0.994132	eQTLGen_cis_eQTLs	-	No
126	q22.31	rs2895249	Y	N	3	1	85.5456	rs10821153	0.910547	9	96300885	A	G	0.00924973	0.00164821	2.002e-08	0.6402	0.678053	FAM120A	protein_coding	intronic	1.077	7	0.999907	eQTLGen_cis_eQTLs	+	No
127	q31.2	rs996826	Y	Y	1	1	5.47088	rs996826	0.266617	9	108847224	A	G	-0.00869649	0.00158521	4.115e-08	0.2017	1	RP11-6F6.1	lincRNA	intergenic	5.539	6
128	q33.1	rs1333907	Y	N	3	1	434.281	rs191242857	1	9	127870796	A	G	-0.0112685	0.00143767	4.565e-15	0.2671	0.990966	SCAI	protein_coding	intronic	0.482	6	0.999445	PsychENCODE_eQTLs:eQTLGen_cis_eQTLs:GTEx/v8/Adipose_Subcutaneous:GTEx/v8/Adipose_Visceral_Omentum:GTEx/v8/Adrenal_Gland:GTEx/v8/Artery_Aorta:GTEx/v8/Artery_Tibial:GTEx/v8/Brain_Caudate_basal_ganglia:GTEx/v8/Brain_Cortex:GTEx/v8/Muscle_Skeletal:GTEx/v8/Nerve_Tibial	+	No
128	q33.1	rs1333907	Y	N	3	1	368.65	rs4837010	1	9	127923013	T	C	0.0110451	0.00144286	1.935e-14	0.7359	0.98641	PPP6C	protein_coding	intronic	8.9	5	0.988609	PsychENCODE_eQTLs:eQTLGen_cis_eQTLs:BIOSQTL/BIOS_eQTL_geneLevel:GTEx/v8/Adipose_Subcutaneous:GTEx/v8/Adipose_Visceral_Omentum:GTEx/v8/Adrenal_Gland:GTEx/v8/Whole_Blood:GTEx/v8/Artery_Tibial:GTEx/v8/Brain_Caudate_basal_ganglia:GTEx/v8/Brain_Frontal_Cortex_BA9:GTEx/v8/Brain_Hippocampus:GTEx/v8/Brain_Nucleus_accumbens_basal_ganglia:GTEx/v8/Brain_Putamen_basal_ganglia:GTEx/v8/Brain_Spinal_cord_cervic…	+	No
128	q33.1	rs1333907	Y	N	3	1	57.9247	rs1333910	0.612165	9	122662247	T	C	0.0107467	0.001302	1.533e-16	0.6064	0.968274	RP11-360A18.2	lincRNA	intergenic	0.19
129	q34.3	rs79140116	Y	N	3	1	644.172	rs73581567	0.942341	9	140247759	T	C	0.0178632	0.00200553	5.241e-19	0.1927	0.967253	EXD3	protein_coding	intronic	3.175	5
129	q34.3	rs79140116	Y	N	3	1	437.962	rs28545754	1	9	140243844	T	C	-0.00863294	0.00129139	2.312e-11	0.5859	0.32047	EXD3	protein_coding	exonic	11.99	5
129	q34.3	rs79140116	Y	N	3	1	205.289	rs28483507	1	9	140282506	T	C	-0.0116594	0.00145252	9.996e-16	0.7413	0.31927	EXD3	protein_coding	intronic	1.104	4
130	p15.1	rs10795105	Y	Y	3	1	258.81	rs10751948	1	10	4018095	T	C	-0.00696756	0.00127354	4.475e-08	0.477	0.73213	RP11-464C19.3	lincRNA	intergenic	6.84	7
130	p15.1	rs10795105	Y	Y	3	1	185.201	rs10751949	1	10	4020714	A	G	0.0070333	0.00127323	3.312e-08	0.5201	0.739185	RP11-464C19.3	lincRNA	intergenic	1.624	3a
130	p15.1	rs10795105	Y	Y	3	1	84.6048	rs10795107	1	10	4016152	A	G	0.00705181	0.00127358	3.08e-08	0.5233	0.724432	RP11-464C19.3	lincRNA	intergenic	2.468	6
131	p13	rs10828248	Y	N	3	1	807.756	rs1467643	1	10	21058916	T	C	0.00825537	0.00130149	2.25e-10	0.6055	0.630774	NEBL	protein_coding	intergenic	1.407	6	5.76984e-24	eQTLGen_cis_eQTLs:GTEx/v8/Whole_Blood	-	No
131	p13	rs10828248	Y	N	3	1	490.781	rs12251016	1	10	21821918	A	T	-0.0124157	0.0013405	1.999e-20	0.6576	0.952006	MLLT10	protein_coding	intergenic	1.781	2c
131	p13	rs10828248	Y	N	3	1	333.259	rs10491053	1	10	21058133	A	G	-0.00854563	0.00130348	5.529e-11	0.3911	0.624083	NEBL	protein_coding	intergenic	3.752	4	5.76984e-24	eQTLGen_cis_eQTLs:GTEx/v8/Whole_Blood	-	No
132	q22.2	rs4746339	Y	N	2	0.999915	5.47349	rs10762686	0.273889	10	77659243	A	G	-0.0081763	0.00148876	3.965e-08	0.2403	1	C10orf11	protein_coding	intronic	4.177	7	0.0410566	eQTLGen_cis_eQTLs	-	No
132	q22.2	rs4746339	Y	N	2	0.999915	5.20821	rs2208947	1	10	77657667	A	G	-0.00809822	0.00147778	4.263e-08	0.2456	1	C10orf11	protein_coding	intronic	0.217	7	0.0410566	eQTLGen_cis_eQTLs	-	No
133	q23.1	rs28800841	Y	Y	2	0.987769	236.818	rs17255092	0.999923	10	86020605	A	G	0.0122687	0.00214338	1.04e-08	0.0976	1	RGR	protein_coding	downstream	5.829	7	1.56159e-06	PsychENCODE_eQTLs:GTEx/v8/Brain_Cerebellar_Hemisphere:GTEx/v8/Brain_Cerebellum:GTEx/v8/Brain_Cortex:GTEx/v8/Brain_Nucleus_accumbens_basal_ganglia:GTEx/v8/Nerve_Tibial	+	No
133	q23.1	rs28800841	Y	Y	2	0.987769	236.609	rs35984466	1	10	86015399	CA	C	-0.0121534	0.00215525	1.706e-08	0.9036	0.712316	RGR	protein_coding	intronic	8.517		1.56159e-06	PsychENCODE_eQTLs:GTEx/v8/Brain_Cerebellar_Hemisphere:GTEx/v8/Brain_Cerebellum:GTEx/v8/Brain_Cortex:GTEx/v8/Brain_Nucleus_accumbens_basal_ganglia:GTEx/v8/Nerve_Tibial	+	No
134	q24.32	rs12250380	Y	N	3	1	271.214	rs145535890	1	10	104696990	A	ATGATAGCCC	-0.0131822	0.00230822	1.121e-08	0.0828	0.954101	CNNM2	protein_coding	intronic	5.47		0.994106	PsychENCODE_eQTLs:eQTLGen_cis_eQTLs:GTEx/v8/Whole_Blood:GTEx/v8/Artery_Tibial:GTEx/v8/Brain_Cerebellum:GTEx/v8/Brain_Frontal_Cortex_BA9	+	Yes	Promoter_anchored_loops:Adult_Cortex:Fetal_Cortex
134	q24.32	rs12250380	Y	N	3	1	242.971	rs10883798	1	10	104660688	A	G	0.0131096	0.00230316	1.255e-08	0.9168	0.942685	C10orf32-ASMT	protein_coding	UTR3	4.245	6		BRAINEAC/CRBL:BRAINEAC/FCTX:BRAINEAC/THAL:BRAINEAC/aveALL		Yes	Promoter_anchored_loops
134	q24.32	rs12250380	Y	N	3	1	25.6523	rs61867287	0.999888	10	106526734	A	T	0.00986844	0.00157141	3.378e-10	0.7935	0.864032	SORCS3	protein_coding	intronic	2.277	6	0.325134	PsychENCODE_eQTLs:eQTLGen_cis_eQTLs:BIOSQTL/BIOS_eQTL_geneLevel:GTEx/v8/Adipose_Subcutaneous:GTEx/v8/Adrenal_Gland:GTEx/v8/Nerve_Tibial	-	Yes	Adult_Cortex:Fetal_Cortex
135	q26.13	rs10901842	Y	Y	3	1	211.577	rs77111523	1	10	126661677	A	T	-0.0110511	0.00201075	3.89e-08	0.8872	0.275945	ZRANB1	protein_coding	intronic	3.909	7	0.99984	eQTLGen_cis_eQTLs:BIOSQTL/BIOS_eQTL_geneLevel:BRAINEAC/WHMT:GTEx/v8/Muscle_Skeletal	-	No
135	q26.13	rs10901842	Y	Y	3	1	201.438	rs76509216	1	10	126661361	A	G	0.0111077	0.00201153	3.355e-08	0.1127	0.275945	ZRANB1	protein_coding	intronic	1.794	6	0.99984	eQTLGen_cis_eQTLs:BIOSQTL/BIOS_eQTL_geneLevel:BRAINEAC/WHMT:GTEx/v8/Muscle_Skeletal	-	No
135	q26.13	rs10901842	Y	Y	3	1	10.2576	rs10901842	0.63417	10	126635262	A	G	0.0085335	0.00145548	4.536e-09	0.2571	1	ZRANB1	protein_coding	intronic	0.491	1f	0.99984	eQTLGen_cis_eQTLs:BIOSQTL/BIOS_eQTL_geneLevel:BRAINEAC/WHMT:GTEx/v8/Muscle_Skeletal	-	No
136	q26.3	rs12773533	Y	Y	3	1	244.175	rs11101597	0.999997	10	134975317	A	G	-0.00804815	0.00141593	1.317e-08	0.7195	0.816916	KNDC1	protein_coding	intronic	6.625	5
136	q26.3	rs12773533	Y	Y	3	1	176.382	rs34774469	1	10	134953920	A	G	0.0109771	0.00182042	1.644e-09	0.2412	0.92451	RPL5P28	pseudogene	intergenic	0.237
136	q26.3	rs12773533	Y	Y	3	1	64.7263	rs12781601	0.999748	10	134972378	A	G	0.00813608	0.00141966	9.981e-09	0.2781	0.832928	KNDC1	protein_coding	intergenic	0.625	5
137	p15.2	rs10766073	Y	N	3	1	461.128	rs10832017	1	11	13309671	A	G	-0.00987266	0.00143227	5.463e-12	0.2703	0.927581	ARNTL	protein_coding	intronic	1.677	5	0.987643	eQTLGen_cis_eQTLs:BIOSQTL/BIOS_eQTL_geneLevel:GTEx/v8/Whole_Blood	-	No
137	p15.2	rs10766073	Y	N	3	1	349.403	rs11022749	1	11	13307366	A	G	0.00980882	0.00143111	7.204e-12	0.729	0.917712	ARNTL	protein_coding	intronic	1.294	6	0.987643	eQTLGen_cis_eQTLs:BIOSQTL/BIOS_eQTL_geneLevel:GTEx/v8/Whole_Blood	-	No
137	p15.2	rs10766073	Y	N	3	1	114.324	rs11022752	0.999996	11	13307622	A	G	0.00978819	0.00143144	8.02e-12	0.7292	0.917712	ARNTL	protein_coding	intronic	9.149	5	0.987643	eQTLGen_cis_eQTLs:BIOSQTL/BIOS_eQTL_geneLevel:GTEx/v8/Whole_Blood	-	No
138	p14.3	rs11028033	Y	Y	1	1	6.43275	rs11028033	0.0556855	11	24595442	T	C	0.00753513	0.00133389	1.609e-08	0.6503	1	LUZP2	protein_coding	intronic	6.096	6	8.71328e-05			No
139	q12.1	rs61904011	Y	Y	2	1	223.466	rs11607308	0.742567	11	57808954	T	C	0.00801633	0.00142766	1.963e-08	0.2731	1	OR9Q1	protein_coding	ncRNA_exonic	1.924	7	0.0085949			No
139	q12.1	rs61904011	Y	Y	2	1	223.422	rs11605988	1	11	57797100	A	T	-0.0078925	0.00142799	3.264e-08	0.7271	0.990269	OR9Q1	protein_coding	intronic	0.002	7	0.0085949			No
140	q12.3	rs584845	Y	N	3	1	409.471	rs10897290	0.98045	11	62451681	T	C	-0.00930528	0.00153883	1.478e-09	0.2187	0.981302	LRRN4CL	protein_coding	intergenic	1.562	7	5.43721e-05			No
140	q12.3	rs584845	Y	N	3	1	276.945	rs2957114	1	11	62510764	T	C	0.00931914	0.00154214	1.51e-09	0.7826	1	TTC9C	protein_coding	intergenic	2.449		0.000139735	eQTLGen_cis_eQTLs:BIOSQTL/BIOS_eQTL_geneLevel:GTEx/v8/Adipose_Subcutaneous:GTEx/v8/Adipose_Visceral_Omentum:GTEx/v8/Adrenal_Gland:GTEx/v8/Cells_EBV-transformed_lymphocytes:GTEx/v8/Whole_Blood:GTEx/v8/Artery_Aorta:GTEx/v8/Artery_Coronary:GTEx/v8/Artery_Tibial:GTEx/v8/Brain_Anterior_cingulate_cortex_BA24:GTEx/v8/Brain_Cerebellar_Hemisphere:GTEx/v8/Brain_Cerebellum:GTEx/v8/Brain_Cortex:GTEx/v8/Brain…	-	No
140	q12.3	rs584845	Y	N	3	1	150.239	rs693486	1	11	62493912	T	C	0.00914164	0.0015442	3.213e-09	0.7834	0.987496	HNRNPUL2-BSCL2	protein_coding	intronic	1.473			BIOSQTL/BIOS_eQTL_geneLevel	+	No
141	q13.5	rs7123238	Y	N	3	1	280.075	rs10793195	1	11	76504732	A	G	0.0101863	0.00190434	8.822e-08	0.7783	0.280265			intronic	18.51	2b
141	q13.5	rs7123238	Y	N	3	1	187.303	rs6144398	0.999999	11	76464812	G	GCGGGAAAAAGTTA	-0.00994363	0.00193909	2.936e-07	0.2109	0.280479			intergenic	6.619
141	q13.5	rs7123238	Y	N	3	1	62.5771	rs28428842	1	11	76445728	T	G	-0.00855149	0.00165534	2.392e-07	0.1801	0.83388			intergenic	1.293	1f
142	q23.2	rs236911	Y	Y	3	1	73.6713	rs10750019	0.997502	11	112875768	C	G	0.00719042	0.00127445	1.677e-08	0.4703	0.210428	NCAM1	protein_coding	intronic	0.26	7		eQTLGen_cis_eQTLs:BIOSQTL/BIOS_eQTL_geneLevel:GTEx/v8/Artery_Tibial:GTEx/v8/Muscle_Skeletal	+	Yes	Dorsolateral_Prefrontal_Cortex:Hippocampus
142	q23.2	rs236911	Y	Y	3	1	59.1218	rs7108081	0.880149	11	112865115	A	G	-0.00728363	0.00127448	1.094e-08	0.5299	0.210428	NCAM1	protein_coding	intronic	5.848	5		eQTLGen_cis_eQTLs:BIOSQTL/BIOS_eQTL_geneLevel:GTEx/v8/Artery_Tibial:GTEx/v8/Muscle_Skeletal	+	Yes	Dorsolateral_Prefrontal_Cortex:Hippocampus
142	q23.2	rs236911	Y	Y	3	1	26.3481	rs7950836	1	11	112856137	T	C	-0.00863494	0.00158236	4.847e-08	0.4907	0.210428	NCAM1	protein_coding	intronic	4.786	5		eQTLGen_cis_eQTLs:BIOSQTL/BIOS_eQTL_geneLevel:GTEx/v8/Artery_Tibial:GTEx/v8/Muscle_Skeletal	+	Yes	Dorsolateral_Prefrontal_Cortex:Hippocampus
143	q25	rs6590700	Y	N	3	0.999986	252.181	rs74622686	1	11	134264227	A	G	-0.0103641	0.0018597	2.5e-08	0.8647	1	B3GAT1	protein_coding	intronic	1.321	5	0.789153	eQTLGen_cis_eQTLs:eQTLGen_trans_eQTLs:BIOSQTL/BIOS_eQTL_geneLevel:GTEx/v8/Adipose_Subcutaneous:GTEx/v8/Adipose_Visceral_Omentum:GTEx/v8/Whole_Blood:GTEx/v8/Artery_Aorta	-	No
143	q25	rs6590700	Y	N	3	0.999986	252.015	rs78975867	1	11	134264729	A	G	0.0102679	0.00186553	3.706e-08	0.1343	1	B3GAT1	protein_coding	intronic	4.374	5	0.789153	eQTLGen_cis_eQTLs:eQTLGen_trans_eQTLs:BIOSQTL/BIOS_eQTL_geneLevel:GTEx/v8/Adipose_Subcutaneous:GTEx/v8/Adipose_Visceral_Omentum:GTEx/v8/Whole_Blood:GTEx/v8/Artery_Aorta	-	No
143	q25	rs6590700	Y	N	3	0.999986	6.1065	rs6590700	0.137576	11	133315491	T	C	0.00853057	0.00150424	1.418e-08	0.7668	1	OPCML	protein_coding	intronic	1.082	7	0.578156			No
144	p13.31	rs7965269	Y	Y	3	1	359.097	rs12306707	1	12	7008616	C	G	-0.00763409	0.00143958	1.142e-07	0.734	0.679907			intronic	1.247	7
144	p13.31	rs7965269	Y	Y	3	1	148.249	rs7134129	1	12	6998158	C	G	0.00780032	0.00144183	6.3e-08	0.2647	0.681579			intronic	6.273	7
144	p13.31	rs7965269	Y	Y	3	1	127.373	rs7309573	1	12	7008438	A	G	0.00762903	0.00143565	1.075e-07	0.2683	0.683712			intronic	2.432	6
145	p12.3	rs12309210	Y	N	3	1	896.87	rs112973000	0.951153	12	15400589	G	GA	0.0104786	0.00136796	1.857e-14	0.3162	0.995654	RERG	protein_coding	intronic	2.932		0.00116496	PsychENCODE_eQTLs	+	No
145	p12.3	rs12309210	Y	N	3	1	487.287	rs73055263	1	12	15417595	A	C	-0.010457	0.00136854	2.15e-14	0.6843	0.986954	RERG	protein_coding	intronic	2.256	7	0.00116496	PsychENCODE_eQTLs	+	No
145	p12.3	rs12309210	Y	N	3	1	424.374	rs12307658	1	12	15388131	A	C	-0.0104873	0.0013675	1.734e-14	0.6834	1	RERG	protein_coding	intronic	1.907	7	0.00116496	PsychENCODE_eQTLs	+	No
146	p12.3	rs4763522	Y	N	3	1	379.154	rs1388693	1	12	19359192	A	G	0.00915073	0.00147355	5.296e-10	0.7523	0.905784	PLEKHA5	protein_coding	intronic	3.834	7	0.999999	PsychENCODE_eQTLs:eQTLGen_cis_eQTLs:BIOSQTL/BIOS_eQTL_geneLevel	+	No
146	p12.3	rs4763522	Y	N	3	1	351.542	rs1399471	1	12	19312221	C	G	-0.00985379	0.00144909	1.049e-11	0.2606	0.981743	PLEKHA5	protein_coding	intronic	2.383	5	0.999999	PsychENCODE_eQTLs:eQTLGen_cis_eQTLs:BIOSQTL/BIOS_eQTL_geneLevel	+	No
146	p12.3	rs4763522	Y	N	3	1	31.8139	rs10841196	0.995514	12	19421256	A	G	-0.0093526	0.00163307	1.023e-08	0.1865	0.572893	PLEKHA5	protein_coding	intronic	2.418	7	0.999999	PsychENCODE_eQTLs:eQTLGen_cis_eQTLs:BIOSQTL/BIOS_eQTL_geneLevel	+	No
147	p12.1	rs9804988	Y	N	3	1	514.346	rs4520683	1	12	23946204	A	G	-0.00746704	0.0013107	1.223e-08	0.3797	0.10936	SOX5	protein_coding	intronic	6.795	7	0.999399			No
147	p12.1	rs9804988	Y	N	3	1	280.752	rs7134575	1	12	23978200	A	G	0.014407	0.00197681	3.152e-13	0.1173	0.955106	SOX5	protein_coding	intronic	0.305	7	0.999399			No
147	p12.1	rs9804988	Y	N	3	1	176.169	rs10734730	1	12	23954548	T	G	0.00767719	0.0012836	2.216e-09	0.4335	0.198109	SOX5	protein_coding	intronic	0.532	6	0.999399			No
148	q12	rs60064985	Y	Y	3	1	344.504	rs10880966	1	12	46801782	C	G	-0.00762122	0.00131016	6.004e-09	0.3805	1	RP11-96H19.1	lincRNA	ncRNA_intronic	3.997	7
148	q12	rs60064985	Y	Y	3	1	208.15	rs2408506	0.999705	12	46725139	T	C	0.00746087	0.00130549	1.095e-08	0.6122	0.760175	SLC38A2	protein_coding	intergenic	0.093	7	0.969357	PsychENCODE_eQTLs:eQTLGen_cis_eQTLs	-	No
148	q12	rs60064985	Y	Y	3	1	140.488	rs4238102	1	12	46726496	A	T	0.00723604	0.00130756	3.123e-08	0.6155	0.790737	SLC38A2	protein_coding	intergenic	9.718	7	0.969357	PsychENCODE_eQTLs:eQTLGen_cis_eQTLs	-	No
149	q13.2	rs1081975	Y	N	3	1	311.083	rs705699	1	12	56384804	A	G	-0.00837664	0.0012981	1.096e-10	0.4006	0.979684	RAB5B	protein_coding	intronic	15.06		0.215699	eQTLGen_cis_eQTLs:GTEx/v8/Artery_Tibial:GTEx/v8/Muscle_Skeletal	+	No
149	q13.2	rs1081975	Y	N	3	1	165.827	rs11171739	1	12	56470625	T	C	0.00817183	0.00128731	2.182e-10	0.5764	0.808872	ERBB3	protein_coding	intergenic	2.614	1f	4.35825e-06	eQTLGen_cis_eQTLs:BIOSQTL/BIOS_eQTL_geneLevel	+	No
149	q13.2	rs1081975	Y	N	3	1	150.905	rs61937247	0.958409	12	56381484	A	C	0.00756708	0.00136763	3.144e-08	0.6835	0.727501	RAB5B	protein_coding	intronic	2.59	7	0.215699	eQTLGen_cis_eQTLs:GTEx/v8/Artery_Tibial:GTEx/v8/Muscle_Skeletal	+	No
150	q21.1	rs7977748	Y	Y	3	1	42.4475	rs11180254	0.998232	12	75240991	A	T	-0.00983961	0.00170235	7.473e-09	0.3154	0.848804	RP11-361A23.3	pseudogene	intergenic	0.074	5
150	q21.1	rs7977748	Y	Y	3	1	33.1205	rs11180256	0.987752	12	75247486	T	C	0.00981865	0.00171625	1.06e-08	0.6938	0.85793	RP11-361A23.3	pseudogene	intergenic	3.001	5
150	q21.1	rs7977748	Y	Y	3	1	8.2851	rs4298976	0.201215	12	75247151	T	G	0.00986164	0.00171656	9.185e-09	0.694	0.871526	RP11-361A23.3	pseudogene	intergenic	4.601
151	q21.31	rs401687	Y	Y	3	1	213.443	rs370604	1	12	83926427	T	C	-0.00806737	0.00127225	2.281e-10	0.495	1	RP11-384P14.1	lincRNA	intergenic	2.725
151	q21.31	rs401687	Y	Y	3	1	206.233	rs7971256	1	12	84093378	A	T	0.00759466	0.00130807	6.415e-09	0.3837	0.530975	RP11-384P14.1	lincRNA	intergenic	2.974	6
151	q21.31	rs401687	Y	Y	3	1	11.1017	rs11115900	0.96777	12	83923359	A	G	0.00795688	0.00127229	4.006e-10	0.5061	0.995988	RP11-384P14.1	lincRNA	intergenic	1.258	6
152	q21.33	rs60689454	Y	N	2	1	49.8527	rs59679178	0.5	12	90415433	CT	C	-0.0102376	0.0018543	3.378e-08	0.7713	1	RP11-654D12.2	lincRNA	intergenic	0.63
152	q21.33	rs60689454	Y	N	2	1	48.4968	rs10745521	0.999922	12	90423754	T	G	0.00738098	0.0014875	6.968e-07	0.2409	0.784708			intergenic	1.841	7
153	q23.1	rs76904423	Y	Y	3	1	537.505	rs117534558	1	12	101178124	C	G	-0.0268918	0.00461186	5.525e-09	0.9806	1	ANO4	protein_coding	intronic	1.212	7	0.844045			No
153	q23.1	rs76904423	Y	Y	3	1	270.476	rs17030496	0.999999	12	101128866	A	C	0.0244125	0.0042799	1.167e-08	0.0226	0.896289	ANO4	protein_coding	intronic	1.043	7	0.844045			No
153	q23.1	rs76904423	Y	Y	3	1	263.611	rs76904423	1	12	101188744	A	G	0.0273068	0.00463535	3.829e-09	0.0192	1	ANO4	protein_coding	UTR5	6.253	4	0.844045			No
154	q23.3	rs3764002	Y	N	3	1	401.319	rs11113256	1	12	107690149	T	C	0.00833637	0.00128926	1.007e-10	0.5811	1	BTBD11	protein_coding	intergenic	3.98	6	0.993433	eQTLGen_cis_eQTLs:BIOSQTL/BIOS_eQTL_geneLevel	-	No
154	q23.3	rs3764002	Y	N	3	1	361.993	rs3764002	1	12	108618630	T	C	-0.0104171	0.00140733	1.343e-13	0.2862	1	WSCD2	protein_coding	exonic	28.1	7	0.494026			No
154	q23.3	rs3764002	Y	N	3	1	36.9353	rs4964208	0.398834	12	107694429	T	C	-0.00857975	0.00128961	2.871e-11	0.4181	0.995846	BTBD11	protein_coding	intergenic	2.985	5	0.993433	eQTLGen_cis_eQTLs:BIOSQTL/BIOS_eQTL_geneLevel	-	No
155	q24.31	rs67624109	Y	N	3	1	943.568	rs2695478	0.5	12	123689521	T	C	0.0126978	0.00160144	2.205e-15	0.8037	0.920254	MPHOSPH9	protein_coding	intronic	6.869		0.000759987	eQTLGen_cis_eQTLs:BIOSQTL/BIOS_eQTL_geneLevel:GTEx/v8/Adipose_Visceral_Omentum:GTEx/v8/Artery_Aorta:GTEx/v8/Artery_Tibial:GTEx/v8/Muscle_Skeletal:GTEx/v8/Nerve_Tibial	-	No
155	q24.31	rs67624109	Y	N	3	1	503.217	rs10846515	1	12	123801672	T	G	-0.0126392	0.00156581	6.91e-16	0.2085	0.987831	SBNO1	protein_coding	intronic	0.328	7	1	eQTLGen_cis_eQTLs:BIOSQTL/BIOS_eQTL_geneLevel:GTEx/v8/Muscle_Skeletal	+	Yes	Promoter_anchored_loops:Adult_Cortex:Fetal_Cortex
155	q24.31	rs67624109	Y	N	3	1	455.028	rs28768122	1	12	123885974	T	C	-0.0108149	0.00148455	3.208e-13	0.2423	0.734877	SETD8	protein_coding	intronic	0.695	6	0.945359	PsychENCODE_eQTLs:eQTLGen_cis_eQTLs:BIOSQTL/BIOS_eQTL_geneLevel:GTEx/v8/Whole_Blood:GTEx/v8/Artery_Tibial:GTEx/v8/Brain_Cerebellar_Hemisphere:GTEx/v8/Brain_Cerebellum:GTEx/v8/Muscle_Skeletal:GTEx/v8/Nerve_Tibial	-	Yes	Adult_Cortex:Fetal_Cortex
156	q13.2	rs67277443	Y	N	3	1	155.678	rs67277443	1	13	34622370	CAGG	C	-0.00745301	0.00130617	1.158e-08	0.3867	1	VDAC1P12	pseudogene	intergenic	2.34
156	q13.2	rs67277443	Y	N	3	1	139.482	rs7333319	0.997868	13	34584388	A	G	0.00709304	0.00127229	2.475e-08	0.4938	0.421781	RFC3	protein_coding	intergenic	9.3	6	0.00098446			Yes	Fetal_Cortex
156	q13.2	rs67277443	Y	N	3	1	18.7819	rs7139664	0.205459	13	34627269	A	G	0.00735802	0.00130623	1.774e-08	0.6134	0.987305	VDAC1P12	pseudogene	intergenic	0.132	6
157	q14.3	rs2408858	Y	N	3	1	630.626	rs73201847	1	13	53929134	T	C	0.00982209	0.00138926	1.549e-12	0.2991	0.380066	AL450423.1	miRNA	intergenic	4.064	6
157	q14.3	rs2408858	Y	N	3	1	424.704	rs7326433	1	13	53922268	A	G	-0.00926479	0.00127896	4.362e-13	0.4486	1	AL450423.1	miRNA	intergenic	3.702	7
157	q14.3	rs2408858	Y	N	3	1	208.758	rs7982061	1	13	60324979	A	G	-0.0102232	0.00148227	5.304e-12	0.2434	0.934855	DIAPH3	protein_coding	intronic	19.55	4	1.22546e-12	PsychENCODE_eQTLs:GTEx/v8/Adipose_Visceral_Omentum:GTEx/v8/Artery_Tibial:GTEx/v8/Brain_Anterior_cingulate_cortex_BA24:GTEx/v8/Brain_Caudate_basal_ganglia:GTEx/v8/Brain_Cortex:GTEx/v8/Brain_Frontal_Cortex_BA9:GTEx/v8/Brain_Hippocampus:GTEx/v8/Brain_Nucleus_accumbens_basal_ganglia	-	No
158	q21.31	rs1460655	Y	Y	3	0.999987	188.558	rs4126981	0.947564	13	66495671	A	G	0.0105046	0.00184486	1.24e-08	0.1379	0.863242	LINC01052	lincRNA	intergenic	6.169
158	q21.31	rs1460655	Y	Y	3	0.999987	188.335	rs113119613	1	13	66584716	T	C	-0.00949118	0.00172598	3.819e-08	0.8379	0.394425	MIR548X2	miRNA	intergenic	0.893	7
158	q21.31	rs1460655	Y	Y	3	0.999987	6.34191	rs17837236	0.223565	13	66589579	A	G	0.0141496	0.00242246	5.181e-09	0.0745	0.329723	MIR548X2	miRNA	intergenic	0.389	7
159	q22.1	rs78116502	Y	N	2	1	284.366	rs9592970	1	13	74691126	A	T	0.0109222	0.00181704	1.846e-09	0.143	0.992209	KLF12	protein_coding	intronic	3.091	6	0.982233	eQTLGen_cis_eQTLs:BIOSQTL/BIOS_eQTL_geneLevel:GTEx/v8/Whole_Blood	-	No
159	q22.1	rs78116502	Y	N	2	1	284.295	rs9600232	1	13	74692807	T	C	-0.0108668	0.00181598	2.178e-09	0.8568	0.992209	KLF12	protein_coding	intronic	6.488	3a	0.982233	eQTLGen_cis_eQTLs:BIOSQTL/BIOS_eQTL_geneLevel:GTEx/v8/Whole_Blood	-	No
160	q12	rs28826952	Y	N	3	0.999977	87.9904	rs111819728	0.903847	14	29462589	T	C	-0.011596	0.00208112	2.523e-08	0.1684	0.843494	RP11-148E17.1	lincRNA	ncRNA_intronic	0.002	6
160	q12	rs28826952	Y	N	3	0.999977	87.4604	rs118085418	1	14	29487482	T	C	0.011247	0.00200946	2.183e-08	0.8159	0.994124	RP11-148E17.1	lincRNA	ncRNA_intronic	1.02	6
160	q12	rs28826952	Y	N	3	0.999977	5.56196	rs72671483	0.900918	14	29697709	A	G	0.0147979	0.0026915	3.847e-08	0.0955	1	RP11-562L8.1	processed_transcript	intergenic	2.013	4
161	q13.2	rs34034928	Y	N	3	1	360.164	rs10145536	1	14	37738197	T	C	0.00760352	0.0013568	2.091e-08	0.6738	0.953825	MIPOL1	protein_coding	intronic	1.588	6	6.81656e-06	GTEx/v8/Adipose_Subcutaneous:GTEx/v8/Adipose_Visceral_Omentum:GTEx/v8/Artery_Tibial:GTEx/v8/Nerve_Tibial	-	No
161	q13.2	rs34034928	Y	N	3	1	211.744	rs17106535	0.947893	14	37740272	A	G	-0.00823951	0.00137808	2.24e-09	0.3078	1	MIPOL1	protein_coding	intronic	1.61	7	6.81656e-06	GTEx/v8/Adipose_Subcutaneous:GTEx/v8/Adipose_Visceral_Omentum:GTEx/v8/Artery_Tibial:GTEx/v8/Nerve_Tibial	-	No
161	q13.2	rs34034928	Y	N	3	1	130.287	rs10151106	1	14	37803019	A	G	-0.00741881	0.00135702	4.571e-08	0.326	0.953825	MIPOL1	protein_coding	intronic	5.998	7	6.81656e-06	GTEx/v8/Adipose_Subcutaneous:GTEx/v8/Adipose_Visceral_Omentum:GTEx/v8/Artery_Tibial:GTEx/v8/Nerve_Tibial	-	No
162	q21.1	rs1137567	Y	N	3	1	351.54	rs10483526	1	14	42086798	T	G	0.00711297	0.00127222	2.262e-08	0.497	0.933202	LRFN5	protein_coding	intronic	4.757		0.712325	PsychENCODE_eQTLs:GTEx/v8/Adipose_Subcutaneous:GTEx/v8/Artery_Aorta:GTEx/v8/Artery_Tibial:GTEx/v8/Brain_Cerebellar_Hemisphere:GTEx/v8/Brain_Cerebellum:GTEx/v8/Nerve_Tibial	-	No
162	q21.1	rs1137567	Y	N	3	1	165.742	rs8020581	1	14	42096100	T	C	-0.00728511	0.00127273	1.043e-08	0.5145	0.954881	LRFN5	protein_coding	intronic	0.094	6	0.712325	PsychENCODE_eQTLs:GTEx/v8/Adipose_Subcutaneous:GTEx/v8/Artery_Aorta:GTEx/v8/Artery_Tibial:GTEx/v8/Brain_Cerebellar_Hemisphere:GTEx/v8/Brain_Cerebellum:GTEx/v8/Nerve_Tibial	-	No
162	q21.1	rs1137567	Y	N	3	1	102.685	rs61990288	0.842616	14	42074726	A	G	-0.00711331	0.00127228	2.254e-08	0.4943	0.948973	CTD-2298J14.2	lincRNA	upstream	2.868	4
163	q21.2	rs1491905	Y	N	3	1	307.812	rs12885033	1	14	47311988	A	C	-0.00905412	0.001589	1.214e-08	0.5466	0.947478	MDGA2	protein_coding	intronic	0.833	7	0.993217	GTEx/v8/Brain_Caudate_basal_ganglia:GTEx/v8/Brain_Cerebellar_Hemisphere:GTEx/v8/Brain_Cortex:GTEx/v8/Brain_Nucleus_accumbens_basal_ganglia	-	No
163	q21.2	rs1491905	Y	N	3	1	189.783	rs12885458	1	14	47303114	T	G	0.00920734	0.00159021	7.025e-09	0.4495	0.97586	MDGA2	protein_coding	intergenic	1.148	7	0.993217	GTEx/v8/Brain_Caudate_basal_ganglia:GTEx/v8/Brain_Cerebellar_Hemisphere:GTEx/v8/Brain_Cortex:GTEx/v8/Brain_Nucleus_accumbens_basal_ganglia	-	No
163	q21.2	rs1491905	Y	N	3	1	111.726	rs12879453	1	14	47309879	A	G	0.009082	0.00159054	1.131e-08	0.4485	0.94798	MDGA2	protein_coding	UTR3	18.74	6	0.993217	GTEx/v8/Brain_Caudate_basal_ganglia:GTEx/v8/Brain_Cerebellar_Hemisphere:GTEx/v8/Brain_Cortex:GTEx/v8/Brain_Nucleus_accumbens_basal_ganglia	-	No
164	q22.2	rs56262555	Y	Y	1	1	5.68274	rs56262555	0.314845	14	55561962	T	C	-0.00715479	0.00127673	2.092e-08	0.4579	1	MAPK1IP1L	protein_coding	intergenic	0.764	5	0.389494	eQTLGen_cis_eQTLs:GTEx/v8/Adipose_Subcutaneous:GTEx/v8/Muscle_Skeletal:GTEx/v8/Nerve_Tibial	-	Yes	Adult_Cortex:Fetal_Cortex
165	q24.1	rs10135971	Y	N	3	1	507.532	rs10148614	1	14	69534982	A	T	0.0102937	0.00135551	3.105e-14	0.3274	0.986111	DCAF5	protein_coding	intronic	4.649	6	0.999969	PsychENCODE_eQTLs:eQTLGen_cis_eQTLs	-	No
165	q24.1	rs10135971	Y	N	3	1	460.125	rs10147369	1	14	69610725	T	C	-0.0103542	0.00135455	2.102e-14	0.6717	0.981526	DCAF5	protein_coding	intronic	7.632	5	0.999969	PsychENCODE_eQTLs:eQTLGen_cis_eQTLs	-	No
165	q24.1	rs10135971	Y	N	3	1	47.2342	rs4902677	1	14	69403695	T	C	-0.00773234	0.00137415	1.833e-08	0.311	1	ACTN1	protein_coding	intronic	1.741	5	0.999931	eQTLGen_cis_eQTLs:GTEx/v8/Artery_Tibial	+	No
166	q24.3	rs34253239	Y	N	3	1	199.526	rs888415	1	14	75109195	A	G	-0.00909297	0.00158996	1.074e-08	0.4503	0.588354	AREL1	protein_coding	intergenic	5.259	7	0.0118021	PsychENCODE_eQTLs:GTEx/v8/Artery_Tibial:GTEx/v8/Brain_Caudate_basal_ganglia:GTEx/v8/Brain_Cerebellar_Hemisphere:GTEx/v8/Brain_Cortex:GTEx/v8/Brain_Frontal_Cortex_BA9	-	No
166	q24.3	rs34253239	Y	N	3	1	173.512	rs4530060	0.968913	14	75090005	C	G	0.00920677	0.00162606	1.5e-08	0.6155	0.398318	CTD-2207P18.2	lincRNA	intergenic	1.263	7
166	q24.3	rs34253239	Y	N	3	1	15.8607	rs2884668	1	14	75281576	A	T	0.00693984	0.0012722	4.884e-08	0.501	0.92727	YLPM1	protein_coding	intronic	1.383	6	0.999933	GTEx/v8/Adipose_Subcutaneous:GTEx/v8/Nerve_Tibial	+	No
167	q32.2	rs3803286	Y	N	3	1	382.279	rs60658776	1	14	103383200	T	C	0.00813326	0.00147475	3.481e-08	0.2471	0.446575	TRAF3	protein_coding	intergenic	3.279	4	0.998406	PsychENCODE_eQTLs:eQTLGen_cis_eQTLs:BIOSQTL/BIOS_eQTL_geneLevel:GTEx/v8/Brain_Cortex:GTEx/v8/Brain_Hypothalamus:GTEx/v8/Brain_Spinal_cord_cervical_c-1	+	No
167	q32.2	rs3803286	Y	N	3	1	261.992	rs12887521	1	14	103247844	A	C	-0.00923435	0.00133792	5.111e-12	0.6548	0.973173	TRAF3	protein_coding	intronic	2.977	5	0.998406	PsychENCODE_eQTLs:eQTLGen_cis_eQTLs:BIOSQTL/BIOS_eQTL_geneLevel:GTEx/v8/Brain_Cortex:GTEx/v8/Brain_Hypothalamus:GTEx/v8/Brain_Spinal_cord_cervical_c-1	+	No
167	q32.2	rs3803286	Y	N	3	1	100.801	rs12436513	1	14	103269755	A	C	-0.00875795	0.00131996	3.238e-11	0.6333	0.864366	TRAF3	protein_coding	intronic	0.116	5	0.998406	PsychENCODE_eQTLs:eQTLGen_cis_eQTLs:BIOSQTL/BIOS_eQTL_geneLevel:GTEx/v8/Brain_Cortex:GTEx/v8/Brain_Hypothalamus:GTEx/v8/Brain_Spinal_cord_cervical_c-1	+	No
168	q14	rs35134214	Y	N	3	1	252.934	rs6495979	1	15	38847359	T	C	0.00751671	0.0014293	1.445e-07	0.2721	0.617722			intronic	4.963	7
168	q14	rs35134214	Y	N	3	1	147.963	rs16967103	0.997316	15	38899190	T	C	-0.00765672	0.00158787	1.424e-06	0.7992	0.884782			intergenic	5.273	5
168	q14	rs35134214	Y	N	3	1	47.3151	rs17574546	0.9999	15	38902476	A	C	-0.00776036	0.00158699	1.01e-06	0.7989	0.871917			intergenic	8.111	5
169	q21.1	rs1915159	Y	N	3	1	324.468	rs1915159	1	15	46406722	A	G	-0.00782407	0.00127428	8.262e-10	0.4714	1	RP11-315O8.1	pseudogene	intergenic	1.768
169	q21.1	rs1915159	Y	N	3	1	300.836	rs1915158	0.920083	15	46406948	T	G	0.00775526	0.00131758	3.955e-09	0.3699	0.555375	RP11-315O8.1	pseudogene	intergenic	1.474
169	q21.1	rs1915159	Y	N	3	1	33.275	rs12441014	0.999991	15	46425973	T	C	0.00797501	0.00145291	4.053e-08	0.2585	0.276679	RP11-315O8.1	pseudogene	intergenic	1.39	7
170	q23	rs11630322	Y	N	2	1	203.78	rs11630322	1	15	69951728	A	G	-0.00755942	0.00132204	1.078e-08	0.636	1	RP11-279F6.3	lincRNA	ncRNA_intronic	5.411	5
170	q23	rs11630322	Y	N	2	1	200.337	rs58825917	1	15	69956205	A	G	0.00681065	0.00165992	4.082e-05	0.3487	0.952965			ncRNA_intronic	0.029	5
171	q24.1	rs71137359	Y	N	3	1	36.0576	rs76112860	0.608598	15	73791386	C	G	0.0154247	0.00278776	3.152e-08	0.0551	0.954468	C15orf60	protein_coding	intronic	0.589	4	0.00343584			No
171	q24.1	rs71137359	Y	N	3	1	22.996	rs77954930	0.999997	15	73904021	T	C	-0.0152333	0.00279254	4.893e-08	0.9451	0.977439	NPTN	protein_coding	intronic	0.227	6	0.988918	GTEx/v8/Artery_Tibial:GTEx/v8/Brain_Cerebellum	-	No
171	q24.1	rs71137359	Y	N	3	1	16.394	rs71137359	0.999837	15	74165781	CTTT	C	-0.0141919	0.00209815	1.339e-11	0.835	1	RP11-24D15.1	antisense	upstream	0.595
172	q25.3	rs4369625	Y	N	3	1	289.955	rs4887460	1	15	86981652	T	C	-0.00753211	0.00129529	6.047e-09	0.406	0.632896	AGBL1	protein_coding	intronic	0.973	6	3.60067e-23			No
172	q25.3	rs4369625	Y	N	3	1	250.463	rs2346308	1	15	86963879	T	G	0.0078189	0.00128833	1.29e-09	0.5789	0.689494	AGBL1	protein_coding	intronic	0.108	6	3.60067e-23			No
172	q25.3	rs4369625	Y	N	3	1	61.6318	rs4243098	0.999812	15	86928354	T	C	0.00861429	0.00135637	2.134e-10	0.6734	1	AGBL1	protein_coding	intronic	1.071	7	3.60067e-23			No
173	q26.1	rs6496748	Y	N	3	1	584.068	rs11073964	1	15	91543761	T	C	0.0103528	0.0012975	1.479e-15	0.4017	0.988147	VPS33B	protein_coding	exonic	22	6	2.91337e-09	eQTLGen_cis_eQTLs:BIOSQTL/BIOS_eQTL_geneLevel:GTEx/v8/Adipose_Subcutaneous:GTEx/v8/Adipose_Visceral_Omentum:GTEx/v8/Whole_Blood:GTEx/v8/Artery_Aorta:GTEx/v8/Artery_Tibial:GTEx/v8/Brain_Caudate_basal_ganglia:GTEx/v8/Brain_Cerebellum:GTEx/v8/Brain_Cortex:GTEx/v8/Brain_Putamen_basal_ganglia:GTEx/v8/Muscle_Skeletal:GTEx/v8/Nerve_Tibial	-	No
173	q26.1	rs6496748	Y	N	3	1	368.291	rs7164916	1	15	91561446	T	C	-0.0100887	0.00130547	1.089e-14	0.6122	0.91623	VPS33B	protein_coding	intronic	4.003	7	2.91337e-09	eQTLGen_cis_eQTLs:BIOSQTL/BIOS_eQTL_geneLevel:GTEx/v8/Adipose_Subcutaneous:GTEx/v8/Adipose_Visceral_Omentum:GTEx/v8/Whole_Blood:GTEx/v8/Artery_Aorta:GTEx/v8/Artery_Tibial:GTEx/v8/Brain_Caudate_basal_ganglia:GTEx/v8/Brain_Cerebellum:GTEx/v8/Brain_Cortex:GTEx/v8/Brain_Putamen_basal_ganglia:GTEx/v8/Muscle_Skeletal:GTEx/v8/Nerve_Tibial	-	No
173	q26.1	rs6496748	Y	N	3	1	85.8683	rs10775251	1	15	91554425	T	G	-0.0101568	0.00130634	7.544e-15	0.6136	0.91623	VPS33B	protein_coding	intronic	7.991	5	2.91337e-09	eQTLGen_cis_eQTLs:BIOSQTL/BIOS_eQTL_geneLevel:GTEx/v8/Adipose_Subcutaneous:GTEx/v8/Adipose_Visceral_Omentum:GTEx/v8/Whole_Blood:GTEx/v8/Artery_Aorta:GTEx/v8/Artery_Tibial:GTEx/v8/Brain_Caudate_basal_ganglia:GTEx/v8/Brain_Cerebellum:GTEx/v8/Brain_Cortex:GTEx/v8/Brain_Putamen_basal_ganglia:GTEx/v8/Muscle_Skeletal:GTEx/v8/Nerve_Tibial	-	No
174	q26.2	rs12438687	Y	Y	3	0.98008	5.41487	rs12438687	0.62106	15	96955776	T	C	0.0105865	0.00189892	2.469e-08	0.1288	1	RP11-522B15.4	lincRNA	intergenic	0.808	4
174	q26.2	rs12438687	Y	Y	3	0.98008	3.00291	rs16975040	1	15	95888064	T	C	0.0070888	0.00128072	3.111e-08	0.5576	1	CTD-2536I1.1	lincRNA	intergenic	5.215	7
174	q26.2	rs12438687	Y	Y	3	0.98008	2.82307	rs12324403	1	15	95878496	T	C	0.00815008	0.00149433	4.923e-08	0.7623	0.178792	CTD-2536I1.1	lincRNA	intergenic	0.719	5
175	p13.3	rs3752490	Y	Y	3	1	472.129	rs8045262	1	16	704529	A	T	-0.00736731	0.00129752	1.36e-08	0.4017	0.979623	WDR90	protein_coding	intronic	4.392	7	4.01806e-46	eQTLGen_cis_eQTLs:BIOSQTL/BIOS_eQTL_geneLevel:GTEx/v8/Adipose_Subcutaneous:GTEx/v8/Adipose_Visceral_Omentum:GTEx/v8/Adrenal_Gland:GTEx/v8/Cells_EBV-transformed_lymphocytes:GTEx/v8/Whole_Blood:GTEx/v8/Artery_Aorta:GTEx/v8/Artery_Tibial:GTEx/v8/Brain_Caudate_basal_ganglia:GTEx/v8/Brain_Cerebellum:GTEx/v8/Brain_Cortex:GTEx/v8/Brain_Nucleus_accumbens_basal_ganglia:GTEx/v8/Brain_Putamen_basal_ganglia:…	-	No
175	p13.3	rs3752490	Y	Y	3	1	200.269	rs4984908	1	16	713747	A	G	0.00741178	0.00129986	1.181e-08	0.6026	0.995884	WDR90	protein_coding	intronic	3.492	5	4.01806e-46	eQTLGen_cis_eQTLs:BIOSQTL/BIOS_eQTL_geneLevel:GTEx/v8/Adipose_Subcutaneous:GTEx/v8/Adipose_Visceral_Omentum:GTEx/v8/Adrenal_Gland:GTEx/v8/Cells_EBV-transformed_lymphocytes:GTEx/v8/Whole_Blood:GTEx/v8/Artery_Aorta:GTEx/v8/Artery_Tibial:GTEx/v8/Brain_Caudate_basal_ganglia:GTEx/v8/Brain_Cerebellum:GTEx/v8/Brain_Cortex:GTEx/v8/Brain_Nucleus_accumbens_basal_ganglia:GTEx/v8/Brain_Putamen_basal_ganglia:…	-	No
175	p13.3	rs3752490	Y	Y	3	1	199.974	rs8046298	1	16	713596	T	G	0.00740398	0.00129986	1.224e-08	0.6026	0.995884	WDR90	protein_coding	intronic	1.113	5	4.01806e-46	eQTLGen_cis_eQTLs:BIOSQTL/BIOS_eQTL_geneLevel:GTEx/v8/Adipose_Subcutaneous:GTEx/v8/Adipose_Visceral_Omentum:GTEx/v8/Adrenal_Gland:GTEx/v8/Cells_EBV-transformed_lymphocytes:GTEx/v8/Whole_Blood:GTEx/v8/Artery_Aorta:GTEx/v8/Artery_Tibial:GTEx/v8/Brain_Caudate_basal_ganglia:GTEx/v8/Brain_Cerebellum:GTEx/v8/Brain_Cortex:GTEx/v8/Brain_Nucleus_accumbens_basal_ganglia:GTEx/v8/Brain_Putamen_basal_ganglia:…	-	No
176	p13.2	rs6497316	Y	Y	3	1	219.746	rs4781557	0.999999	16	9713228	A	G	-0.00759796	0.0013695	2.885e-08	0.3149	0.97719	RNA5SP404	rRNA	intergenic	2.421	7
176	p13.2	rs6497316	Y	Y	3	1	169.693	rs7190267	1	16	9715460	T	C	0.00827049	0.00136589	1.407e-09	0.682	0.995425	RNA5SP404	rRNA	intergenic	0.332	6
176	p13.2	rs6497316	Y	Y	3	1	74.0948	rs7190668	1	16	9715712	T	C	0.00824891	0.00136821	1.646e-09	0.684	0.995425	RNA5SP404	rRNA	intergenic	2.009	6
177	p12.1	rs62032342	Y	N	3	1	558.939	rs13335399	1	16	25432873	A	G	-0.0123924	0.00185737	2.522e-11	0.8643	0.870817	CTA-249B10.1	lincRNA	ncRNA_intronic	1.566	7
177	p12.1	rs62032342	Y	N	3	1	412.308	rs4787317	1	16	25353267	T	G	0.014165	0.00178288	1.934e-15	0.1497	0.993053	CTA-249B10.1	lincRNA	intergenic	0.522	5
177	p12.1	rs62032342	Y	N	3	1	161.683	rs12935786	1	16	25370671	A	G	0.0139569	0.00178386	5.101e-15	0.1495	0.986117	CTA-249B10.1	lincRNA	intergenic	0.515	7
178	p11.2	rs8044030	Y	N	3	1	308.846	rs375452507	1	16	31115259	A	T	0.00970976	0.00160359	1.402e-09	0.6189	0.572686	BCKDK	protein_coding	intergenic	4.686	7	0.00580436	eQTLGen_cis_eQTLs:BIOSQTL/BIOS_eQTL_geneLevel:BRAINEAC/HIPP:GTEx/v8/Whole_Blood	-	No
178	p11.2	rs8044030	Y	N	3	1	193.912	rs35351013	1	16	31069854	A	G	-0.00731164	0.00131056	2.423e-08	0.3799	0.709312	ZNF668	protein_coding	intergenic	6.342		0.268892	PsychENCODE_eQTLs:eQTLGen_cis_eQTLs:BIOSQTL/BIOS_eQTL_geneLevel:GTEx/v8/Adipose_Subcutaneous:GTEx/v8/Adipose_Visceral_Omentum:GTEx/v8/Whole_Blood:GTEx/v8/Artery_Aorta:GTEx/v8/Artery_Tibial	-	Yes	Promoter_anchored_loops:Adult_Cortex:Fetal_Cortex
178	p11.2	rs8044030	Y	N	3	1	76.1953	rs1549293	0.99997	16	31141993	T	C	-0.00722707	0.00131929	4.292e-08	0.3676	0.626274	KAT8	protein_coding	UTR3	1.379		0.912576	PsychENCODE_eQTLs:eQTLGen_cis_eQTLs:BIOSQTL/BIOS_eQTL_geneLevel:GTEx/v8/Adipose_Subcutaneous:GTEx/v8/Adipose_Visceral_Omentum:GTEx/v8/Adrenal_Gland:GTEx/v8/Cells_EBV-transformed_lymphocytes:GTEx/v8/Whole_Blood:GTEx/v8/Artery_Aorta:GTEx/v8/Artery_Coronary:GTEx/v8/Artery_Tibial:GTEx/v8/Brain_Amygdala:GTEx/v8/Brain_Anterior_cingulate_cortex_BA24:GTEx/v8/Brain_Caudate_basal_ganglia:GTEx/v8/Brain_Cere…	+	No
179	q12.1	rs7187662	Y	N	3	1	57.3222	rs746157	1	16	49593393	T	C	-0.01143	0.00169938	1.743e-11	0.8315	0.690285	ZNF423	protein_coding	intronic	1.469	5	0.990469			Yes	Fetal_Cortex
179	q12.1	rs7187662	Y	N	3	1	32.7407	rs12925456	1	16	49596645	A	T	0.0114232	0.00169938	1.794e-11	0.1685	0.690285	ZNF423	protein_coding	intronic	4.299	7	0.990469			Yes	Fetal_Cortex
179	q12.1	rs7187662	Y	N	3	1	26.683	rs11643007	0.448099	16	49612461	A	C	0.010764	0.0018626	7.514e-09	0.1348	0.526294	ZNF423	protein_coding	intronic	18.85	5	0.990469			Yes	Fetal_Cortex
180	q21	rs1369788	Y	Y	3	1	31.8053	rs1369788	0.998453	16	60591948	A	T	0.008384	0.00129783	1.047e-10	0.4011	1	RP11-354I13.1	lincRNA	intergenic	5.114	6
180	q21	rs1369788	Y	Y	3	1	25.3735	rs8047758	0.998826	16	60597532	T	C	-0.00833952	0.00129859	1.342e-10	0.6003	0.991909	RP11-354I13.1	lincRNA	intergenic	1.045	6
180	q21	rs1369788	Y	Y	3	1	12.7583	rs8057168	0.35743	16	60595796	T	C	-0.00834896	0.00129864	1.285e-10	0.6004	0.995936	RP11-354I13.1	lincRNA	intergenic	0.958	6
181	q21	rs62053265	Y	N	3	1	368.168	rs146743763	1	16	70127480	A	AAT	0.00718176	0.00129099	2.65e-08	0.415	0.767498	RP11-106J23.1	pseudogene	intergenic	3.248
181	q21	rs62053265	Y	N	3	1	144.826	rs1983016	0.999976	16	69970329	A	G	-0.00823488	0.0014632	1.821e-08	0.253	0.233417	WWP2	protein_coding	exonic	0.418	5	0.977902	PsychENCODE_eQTLs:eQTLGen_cis_eQTLs:BIOSQTL/BIOS_eQTL_geneLevel:GTEx/v8/Artery_Coronary:GTEx/v8/Artery_Tibial:GTEx/v8/Brain_Cerebellar_Hemisphere:GTEx/v8/Brain_Cerebellum:GTEx/v8/Brain_Cortex:GTEx/v8/Brain_Hypothalamus:GTEx/v8/Brain_Spinal_cord_cervical_c-1	+	No
181	q21	rs62053265	Y	N	3	1	120.163	rs2549066	1	16	70136868	A	G	-0.00717594	0.0012904	2.682e-08	0.5837	0.761249	PDPR	protein_coding	intergenic	3.732	6	4.85026e-08	eQTLGen_cis_eQTLs:BIOSQTL/BIOS_eQTL_geneLevel:GTEx/v8/Adipose_Subcutaneous:GTEx/v8/Adipose_Visceral_Omentum:GTEx/v8/Whole_Blood:GTEx/v8/Artery_Aorta:GTEx/v8/Brain_Cerebellum:GTEx/v8/Muscle_Skeletal:GTEx/v8/Nerve_Tibial	-	No
182	q23.1	rs1683399	Y	N	3	1	376.325	rs17701060	1	16	77094513	A	T	0.0124101	0.00197173	3.092e-10	0.882	0.213302	MON1B	protein_coding	intergenic	2.781	6	0.22974	PsychENCODE_eQTLs:eQTLGen_cis_eQTLs:BIOSQTL/BIOS_eQTL_geneLevel:GTEx/v8/Adipose_Subcutaneous:GTEx/v8/Whole_Blood:GTEx/v8/Artery_Aorta:GTEx/v8/Artery_Tibial:GTEx/v8/Brain_Putamen_basal_ganglia:GTEx/v8/Muscle_Skeletal:GTEx/v8/Nerve_Tibial	+	No
182	q23.1	rs1683399	Y	N	3	1	308.939	rs664408	1	16	77104820	A	G	-0.00898931	0.00128108	2.272e-12	0.4412	0.992045	MON1B	protein_coding	intergenic	4.793		0.22974	PsychENCODE_eQTLs:eQTLGen_cis_eQTLs:BIOSQTL/BIOS_eQTL_geneLevel:GTEx/v8/Adipose_Subcutaneous:GTEx/v8/Whole_Blood:GTEx/v8/Artery_Aorta:GTEx/v8/Artery_Tibial:GTEx/v8/Brain_Putamen_basal_ganglia:GTEx/v8/Muscle_Skeletal:GTEx/v8/Nerve_Tibial	+	No
182	q23.1	rs1683399	Y	N	3	1	45.4272	rs139888698	1	16	77241309	CAG	C	-0.00956185	0.0015719	1.178e-09	0.4327	0.458834	SYCE1L	protein_coding	ncRNA_intronic	1.079		0.0721375	eQTLGen_cis_eQTLs:BIOSQTL/BIOS_eQTL_geneLevel:GTEx/v8/Adipose_Subcutaneous:GTEx/v8/Adipose_Visceral_Omentum:GTEx/v8/Adrenal_Gland:GTEx/v8/Whole_Blood:GTEx/v8/Artery_Aorta:GTEx/v8/Artery_Coronary:GTEx/v8/Artery_Tibial:GTEx/v8/Brain_Amygdala:GTEx/v8/Brain_Anterior_cingulate_cortex_BA24:GTEx/v8/Brain_Caudate_basal_ganglia:GTEx/v8/Brain_Cerebellum:GTEx/v8/Brain_Cortex:GTEx/v8/Brain_Frontal_Cortex_BA9…	-	No
183	q24.3	rs164749	Y	N	3	1	251.171	rs164749	1	16	89708224	T	G	-0.00886093	0.00128271	4.928e-12	0.5639	1	CHMP1A	protein_coding	intergenic	1.21		0.252037	PsychENCODE_eQTLs:eQTLGen_cis_eQTLs:BIOSQTL/BIOS_eQTL_geneLevel:GTEx/v8/Adipose_Subcutaneous:GTEx/v8/Adrenal_Gland:GTEx/v8/Artery_Aorta:GTEx/v8/Artery_Tibial:GTEx/v8/Nerve_Tibial	-	No
183	q24.3	rs164749	Y	N	3	1	194.688	rs3212358	1	16	89984739	A	G	0.00805006	0.0012784	3.037e-10	0.5492	0.987606	MC1R	protein_coding	UTR5	6.637	4	3.24606e-07	eQTLGen_cis_eQTLs:BIOSQTL/BIOS_eQTL_geneLevel:GTEx/v8/Adipose_Subcutaneous:GTEx/v8/Artery_Tibial:GTEx/v8/Brain_Caudate_basal_ganglia:GTEx/v8/Muscle_Skeletal:GTEx/v8/Nerve_Tibial	+	No
183	q24.3	rs164749	Y	N	3	1	75.3831	rs9932089	1	16	89997381	A	G	0.00711417	0.00127471	2.395e-08	0.5314	0.625576	TUBB3	protein_coding	UTR5	0.015	7		BIOSQTL/BIOS_eQTL_geneLevel	-	No
184	p13.2	rs79940062	Y	N	3	1	146.05	rs76696724	1	17	5253983	A	G	-0.0206781	0.0042434	1.099e-06	0.977	0.280588			intronic	7.486	5
184	p13.2	rs79940062	Y	N	3	1	92.2168	rs141291482	1	17	4765760	A	G	0.0241038	0.00456599	1.301e-07	0.0198	0.900007			intronic	1.619	7
184	p13.2	rs79940062	Y	N	3	1	54.4332	rs79940062	0.999917	17	4797910	A	G	0.0242192	0.00442602	4.45e-08	0.0211	1	MINK1	protein_coding	exonic	26.9	5	0.999984			No
185	p11.2	rs203462	Y	N	2	1	159.351	rs2108978	1	17	19861458	T	C	0.00745975	0.00131287	1.333e-08	0.3765	1	AKAP10	protein_coding	exonic	13.5		0.932283	eQTLGen_cis_eQTLs:BIOSQTL/BIOS_eQTL_geneLevel:GTEx/v8/Adipose_Subcutaneous:GTEx/v8/Adipose_Visceral_Omentum:GTEx/v8/Whole_Blood:GTEx/v8/Artery_Aorta:GTEx/v8/Artery_Coronary:GTEx/v8/Artery_Tibial:GTEx/v8/Muscle_Skeletal:GTEx/v8/Nerve_Tibial	+	No
185	p11.2	rs203462	Y	N	2	1	159.26	rs7222403	0.999857	17	19879164	T	C	-0.00731249	0.00129539	1.652e-08	0.5942	0.907865	AKAP10	protein_coding	intronic	1.359	1f	0.932283	eQTLGen_cis_eQTLs:BIOSQTL/BIOS_eQTL_geneLevel:GTEx/v8/Adipose_Subcutaneous:GTEx/v8/Adipose_Visceral_Omentum:GTEx/v8/Whole_Blood:GTEx/v8/Artery_Aorta:GTEx/v8/Artery_Coronary:GTEx/v8/Artery_Tibial:GTEx/v8/Muscle_Skeletal:GTEx/v8/Nerve_Tibial	+	No
186	q11.2	rs28494843	Y	N	3	1	297.89	rs76529457	0.999752	17	29142622	T	C	-0.0124349	0.0024609	4.341e-07	0.1129	0.195149			intronic	2.397	5
186	q11.2	rs28494843	Y	N	3	1	196.506	rs12103447	1	17	29174735	A	T	0.0117614	0.00253097	3.363e-06	0.8941	0.188141			ncRNA_intronic	0.249	6
186	q11.2	rs28494843	Y	N	3	1	100.354	rs2874724	1	17	29072433	T	C	0.0124897	0.00245522	3.64e-07	0.8865	0.193898			ncRNA_intronic	0.542	7
187	q21.31	rs12936234	Y	Y	3	0.975695	28.0748	rs12946454	1	17	43208121	A	T	-0.00810663	0.00145567	2.564e-08	0.743	0.263352	PLCD3	protein_coding	intronic	3.417	4	0.000143297	BIOSQTL/BIOS_eQTL_geneLevel:GTEx/v8/Adipose_Subcutaneous:GTEx/v8/Adipose_Visceral_Omentum:GTEx/v8/Artery_Aorta:GTEx/v8/Artery_Tibial:GTEx/v8/Muscle_Skeletal:GTEx/v8/Nerve_Tibial	+	Yes	EP_links_oneway:Promoter_anchored_loops
187	q21.31	rs12936234	Y	Y	3	0.975695	22.557	rs12936234	0.999983	17	43177951	T	C	0.00978175	0.00163574	2.234e-09	0.3473	1	NMT1	protein_coding	intronic	2.317	6	0.998501	eQTLGen_cis_eQTLs:BIOSQTL/BIOS_eQTL_geneLevel:GTEx/v8/Adipose_Subcutaneous:GTEx/v8/Adipose_Visceral_Omentum:GTEx/v8/Adrenal_Gland:GTEx/v8/Artery_Aorta:GTEx/v8/Artery_Coronary:GTEx/v8/Artery_Tibial:GTEx/v8/Brain_Anterior_cingulate_cortex_BA24:GTEx/v8/Brain_Caudate_basal_ganglia:GTEx/v8/Brain_Cerebellar_Hemisphere:GTEx/v8/Brain_Cerebellum:GTEx/v8/Brain_Cortex:GTEx/v8/Brain_Frontal_Cortex_BA9:GTEx/v…	+	No
187	q21.31	rs12936234	Y	Y	3	0.975695	2.51482	rs10714830	0.999522	17	43112822	CG	C	0.00909846	0.00156411	6.009e-09	0.4544	0.580123	DCAKD	protein_coding	intronic	0.907		0.0293861	PsychENCODE_eQTLs:eQTLGen_cis_eQTLs:BIOSQTL/BIOS_eQTL_geneLevel:GTEx/v8/Adipose_Subcutaneous:GTEx/v8/Adipose_Visceral_Omentum:GTEx/v8/Adrenal_Gland:GTEx/v8/Whole_Blood:GTEx/v8/Artery_Aorta:GTEx/v8/Artery_Coronary:GTEx/v8/Artery_Tibial:GTEx/v8/Brain_Anterior_cingulate_cortex_BA24:GTEx/v8/Brain_Cerebellar_Hemisphere:GTEx/v8/Brain_Cerebellum:GTEx/v8/Brain_Cortex:GTEx/v8/Brain_Frontal_Cortex_BA9:GTEx…	-	No
188	q21.33	rs12453010	Y	N	3	1	899.537	rs34889414	1	17	50276929	C	G	-0.0109784	0.00139302	3.24e-15	0.7037	0.650333	snoZ178	snoRNA	intergenic	0.338	7
188	q21.33	rs12453010	Y	N	3	1	546.951	rs12601842	1	17	50271517	A	G	0.0109803	0.00139343	3.273e-15	0.296	0.650333	snoZ178	snoRNA	intergenic	3.408	7
188	q21.33	rs12453010	Y	N	3	1	377.732	rs4605214	1	17	50282834	T	C	0.0109443	0.00139275	3.907e-15	0.2965	0.654939	snoZ178	snoRNA	intergenic	2.441	7
189	q23.2	rs117140195	Y	N	3	1	404.195	rs72845226	1	17	61343753	A	G	0.00861598	0.00159054	6.06e-08	0.8001	0.992842			ncRNA_intronic	5.875	6
189	q23.2	rs117140195	Y	N	3	1	186.704	rs117917984	0.900315	17	61334783	A	T	-0.00861771	0.00159204	6.212e-08	0.1994	0.992842			ncRNA_intronic	2.963	7
189	q23.2	rs117140195	Y	N	3	1	171.654	rs72843166	1	17	61098296	T	G	-0.00812072	0.00160425	4.154e-07	0.1954	0.957363			intronic	1.416	5
190	q24.2	rs113985803	Y	N	3	1	952.358	rs12449442	1	17	65947640	A	G	0.0136927	0.0015465	8.457e-19	0.2157	0.841419	BPTF	protein_coding	ncRNA_exonic	0.013	5	1	PsychENCODE_eQTLs:eQTLGen_cis_eQTLs:GTEx/v8/Cells_EBV-transformed_lymphocytes:GTEx/v8/Artery_Aorta:GTEx/v8/Brain_Caudate_basal_ganglia:GTEx/v8/Brain_Cerebellar_Hemisphere:GTEx/v8/Brain_Cerebellum:GTEx/v8/Nerve_Tibial	-	No
190	q24.2	rs113985803	Y	N	3	1	511.37	rs62084234	1	17	65847060	A	G	-0.0142196	0.00155439	5.809e-20	0.7873	0.875276	BPTF	protein_coding	intronic	2.115	6	1	PsychENCODE_eQTLs:eQTLGen_cis_eQTLs:GTEx/v8/Cells_EBV-transformed_lymphocytes:GTEx/v8/Artery_Aorta:GTEx/v8/Brain_Caudate_basal_ganglia:GTEx/v8/Brain_Cerebellar_Hemisphere:GTEx/v8/Brain_Cerebellum:GTEx/v8/Nerve_Tibial	-	No
190	q24.2	rs113985803	Y	N	3	1	448.098	rs28512206	1	17	66089873	A	T	-0.013663	0.00185085	1.56e-13	0.7595	0.64667	LOC732538	pseudogene	intergenic	1.575	7
191	q25.1	rs62086015	Y	Y	2	1	249.489	rs9905269	1	17	74808710	T	C	-0.0165942	0.00277635	2.268e-09	0.9139	1	CTD-2246P4.1	lincRNA	intergenic	0.147	4
191	q25.1	rs62086015	Y	Y	2	1	249.272	rs9900565	1	17	74812015	T	C	0.0161837	0.00274625	3.803e-09	0.0882	0.939489	CTD-2246P4.1	lincRNA	intergenic	1.296	7
192	q11.2	rs1788823	Y	Y	3	1	244.997	rs303762	1	18	21082317	T	C	-0.00818537	0.00133857	9.628e-10	0.6555	0.626629	C18orf8	protein_coding	intergenic	0.126		0.999882	eQTLGen_cis_eQTLs:BIOSQTL/BIOS_eQTL_geneLevel:BRAINEAC/CRBL:GTEx/v8/Adipose_Subcutaneous:GTEx/v8/Adipose_Visceral_Omentum:GTEx/v8/Whole_Blood:GTEx/v8/Artery_Aorta:GTEx/v8/Artery_Coronary:GTEx/v8/Artery_Tibial:GTEx/v8/Brain_Anterior_cingulate_cortex_BA24:GTEx/v8/Brain_Caudate_basal_ganglia:GTEx/v8/Brain_Cerebellar_Hemisphere:GTEx/v8/Brain_Cerebellum:GTEx/v8/Brain_Cortex:GTEx/v8/Brain_Frontal_Corte…	-	Yes	Adult_Cortex:Fetal_Cortex:Hippocampus
192	q11.2	rs1788823	Y	Y	3	1	215.067	rs1367085	1	18	21079654	T	C	0.00708679	0.00128617	3.591e-08	0.5735	0.33314	C18orf8	protein_coding	intergenic	3.079	2b	0.999882	eQTLGen_cis_eQTLs:BIOSQTL/BIOS_eQTL_geneLevel:BRAINEAC/CRBL:GTEx/v8/Adipose_Subcutaneous:GTEx/v8/Adipose_Visceral_Omentum:GTEx/v8/Whole_Blood:GTEx/v8/Artery_Aorta:GTEx/v8/Artery_Coronary:GTEx/v8/Artery_Tibial:GTEx/v8/Brain_Anterior_cingulate_cortex_BA24:GTEx/v8/Brain_Caudate_basal_ganglia:GTEx/v8/Brain_Cerebellar_Hemisphere:GTEx/v8/Brain_Cerebellum:GTEx/v8/Brain_Cortex:GTEx/v8/Brain_Frontal_Corte…	-	Yes	Adult_Cortex:Fetal_Cortex:Hippocampus
192	q11.2	rs1788823	Y	Y	3	1	38.7319	rs6507716	1	18	21115060	A	G	0.00730021	0.0012727	9.666e-09	0.5141	0.433625	NPC1	protein_coding	intronic	4.553	1f	0.000213375	eQTLGen_cis_eQTLs:BIOSQTL/BIOS_eQTL_geneLevel:GTEx/v8/Adipose_Subcutaneous:GTEx/v8/Adipose_Visceral_Omentum:GTEx/v8/Adrenal_Gland:GTEx/v8/Artery_Aorta:GTEx/v8/Artery_Coronary:GTEx/v8/Artery_Tibial:GTEx/v8/Brain_Anterior_cingulate_cortex_BA24:GTEx/v8/Brain_Caudate_basal_ganglia:GTEx/v8/Brain_Cerebellar_Hemisphere:GTEx/v8/Brain_Cerebellum:GTEx/v8/Brain_Cortex:GTEx/v8/Brain_Frontal_Cortex_BA9:GTEx/v…	-	No
193	q12.1	rs17747003	Y	Y	3	1	80.0034	rs1384876	0.60558	18	31203929	T	C	0.00715777	0.00127249	1.857e-08	0.4892	0.499242	ASXL3	protein_coding	intronic	0.247	6	0.999977			Yes	Adult_Cortex
193	q12.1	rs17747003	Y	Y	3	1	40.6485	rs35738516	0.822653	18	31195424	A	G	-0.00720367	0.00127251	1.509e-08	0.5111	0.501285	ASXL3	protein_coding	intronic	2.446	6	0.999977			Yes	Adult_Cortex
193	q12.1	rs17747003	Y	Y	3	1	40.3403	rs12961600	0.961103	18	31206380	A	C	-0.00717561	0.0012725	1.709e-08	0.5109	0.499242	ASXL3	protein_coding	intronic	4.937	7	0.999977			Yes	Adult_Cortex
194	q12.2	rs12967741	Y	Y	3	1	552.3	rs12969480	1	18	35147621	C	G	0.011497	0.00187065	7.938e-10	0.2332	0.587449	CELF4	protein_coding	intergenic	10.71	3a	0.974365			No
194	q12.2	rs12967741	Y	Y	3	1	328.561	rs12962050	1	18	35179808	A	G	-0.00932636	0.00134521	4.11e-12	0.6625	0.983116	CELF4	protein_coding	intergenic	0.376	7	0.974365			No
194	q12.2	rs12967741	Y	Y	3	1	226.872	rs11082011	1	18	35145122	T	C	-0.0102095	0.00172984	3.582e-09	0.7022	0.906309	CELF4	protein_coding	intronic	19.67	2b	0.974365			No
195	q12.3	rs6507431	Y	N	3	1	512.311	rs2217731	0.7287	18	39305562	A	G	0.0121725	0.00168594	5.213e-13	0.8281	0.837937	RP11-188I24.1	pseudogene	intergenic	8.608
195	q12.3	rs6507431	Y	N	3	1	291.256	rs4890356	1	18	39303976	A	G	-0.0121713	0.00168788	5.542e-13	0.1714	0.843381	RP11-188I24.1	pseudogene	intergenic	6.497	7
195	q12.3	rs6507431	Y	N	3	1	220.093	rs983294	1	18	39314744	A	G	-0.0114872	0.00162111	1.385e-12	0.1901	0.921448	RP11-188I24.1	pseudogene	intergenic	3.479
196	q12.3	rs72902653	Y	Y	3	1	84.7939	rs72902653	1	18	42749081	A	G	-0.0103529	0.00148707	3.359e-12	0.2411	1	RP11-846C15.2	antisense	ncRNA_exonic	6.663	4
196	q12.3	rs72902653	Y	Y	3	1	48.9915	rs72902669	0.5	18	42753258	A	G	0.0103261	0.00148749	3.863e-12	0.7591	1	RP11-846C15.2	antisense	ncRNA_intronic	7.775	7
196	q12.3	rs72902653	Y	Y	3	1	39.1695	rs11082430	0.999997	18	42752377	C	G	0.0102863	0.0014856	4.392e-12	0.7582	1	RP11-846C15.2	antisense	ncRNA_intronic	0.522	7
197	q21.2	rs17411339	Y	N	3	1	788.282	rs62097986	1	18	50818827	A	C	0.0146558	0.00160982	8.713e-20	0.4075	0.93459	DCC	protein_coding	intronic	0.113	7	0.999999	PsychENCODE_eQTLs:GTEx/v8/Adrenal_Gland:GTEx/v8/Nerve_Tibial	-	Yes	Fetal_Cortex
197	q21.2	rs17411339	Y	N	3	1	500.014	rs11663694	1	18	50559986	T	C	-0.0130041	0.00161863	9.41e-16	0.6057	0.599611	DCC	protein_coding	intronic	2.525	6	0.999999	PsychENCODE_eQTLs:GTEx/v8/Adrenal_Gland:GTEx/v8/Nerve_Tibial	-	Yes	Fetal_Cortex
197	q21.2	rs17411339	Y	N	3	1	291.085	rs1431196	0.999958	18	50832102	A	G	-0.0132543	0.00128707	7.158e-25	0.5759	0.979011	DCC	protein_coding	intronic	10.5	7	0.999999	PsychENCODE_eQTLs:GTEx/v8/Adrenal_Gland:GTEx/v8/Nerve_Tibial	-	Yes	Fetal_Cortex
198	q23	rs11665567	Y	N	3	1	490.807	rs143283559	1	18	77567761	T	G	-0.0117842	0.0017422	1.342e-11	0.724	0.562761	RP11-154H12.3	lincRNA	ncRNA_intronic	4.393	7
198	q23	rs11665567	Y	N	3	1	334.6	rs140504125	1	18	77567765	T	C	0.011865	0.00174357	1.01e-11	0.2753	0.550626	RP11-154H12.3	lincRNA	ncRNA_intronic	5.537	7
198	q23	rs11665567	Y	N	3	1	162.403	rs11664298	1	18	77578986	A	G	0.0128369	0.0015672	2.601e-16	0.208	0.952321	RP11-154H12.3	lincRNA	intergenic	4.359	5
199	p13.3	rs13169	Y	N	3	1	282.451	rs3180287	1	19	804396	T	C	0.0102895	0.00165426	4.958e-10	0.1804	1	PTBP1	protein_coding	exonic	19.64		0.998739	eQTLGen_cis_eQTLs	-	No
199	p13.3	rs13169	Y	N	3	1	205.146	rs72980731	1	19	2711234	A	G	-0.00832646	0.00152667	4.922e-08	0.2236	0.746826	DIRAS1	protein_coding	intergenic	6.1	5	0.623342	eQTLGen_cis_eQTLs:BIOSQTL/BIOS_eQTL_geneLevel:GTEx/v8/Whole_Blood:GTEx/v8/Artery_Aorta	-	No
199	p13.3	rs13169	Y	N	3	1	70.5769	rs73490587	0.998867	19	807075	C	G	-0.00985745	0.00164648	2.141e-09	0.8174	0.984005	PTBP1	protein_coding	intronic	5.313	2b	0.998739	eQTLGen_cis_eQTLs	-	No
200	p13.2	rs57148308	Y	N	3	1	62.6393	rs10401513	1	19	10778763	A	T	0.00609205	0.00132724	4.429e-06	0.3575	0.964724			intronic	0.851	4
200	p13.2	rs57148308	Y	N	3	1	52.3613	rs12974306	1	19	10830281	T	G	-0.00648149	0.00127313	3.561e-07	0.4809	0.443654			intronic	5.713	4
200	p13.2	rs57148308	Y	N	3	1	12.0891	rs12976577	1	19	10778173	A	G	-0.00612467	0.00132741	3.947e-06	0.6427	0.964724			intronic	2.065	7
201	p13.11	rs2023878	Y	N	3	1	456.617	rs2023878	0.884682	19	18834124	T	C	-0.0091946	0.0015563	3.458e-09	0.212	1	CRTC1	protein_coding	intronic	0.15	5	0.980548	GTEx/v8/Muscle_Skeletal	+	No
201	p13.11	rs2023878	Y	N	3	1	243.382	rs11880800	1	19	18841157	C	G	0.0087655	0.00154731	1.47e-08	0.7846	0.93056	CRTC1	protein_coding	intronic	1.106	4	0.980548	GTEx/v8/Muscle_Skeletal	+	No
201	p13.11	rs2023878	Y	N	3	1	215.06	rs34482977	1	19	18824038	C	G	0.00916669	0.00155737	3.952e-09	0.7884	1	CRTC1	protein_coding	intronic	0.905	2b	0.980548	GTEx/v8/Muscle_Skeletal	+	No
202	q13.12	rs4586564	Y	N	3	1	543.388	rs496730	0.991267	19	37451439	T	C	0.00758611	0.00127626	2.783e-09	0.5399	0.175967	ZNF568	protein_coding	intronic	1.815	6	4.90823e-09	PsychENCODE_eQTLs:eQTLGen_cis_eQTLs:BIOSQTL/BIOS_eQTL_geneLevel:GTEx/v8/Adipose_Subcutaneous:GTEx/v8/Adipose_Visceral_Omentum:GTEx/v8/Artery_Aorta:GTEx/v8/Artery_Tibial:GTEx/v8/Brain_Cerebellum:GTEx/v8/Muscle_Skeletal:GTEx/v8/Nerve_Tibial	+	No
202	q13.12	rs4586564	Y	N	3	1	296.619	rs7259605	0.997415	19	37466079	T	C	-0.00763169	0.0012762	2.23e-09	0.4604	0.178883	ZNF568	protein_coding	intronic	4.345	7	4.90823e-09	PsychENCODE_eQTLs:eQTLGen_cis_eQTLs:BIOSQTL/BIOS_eQTL_geneLevel:GTEx/v8/Adipose_Subcutaneous:GTEx/v8/Adipose_Visceral_Omentum:GTEx/v8/Artery_Aorta:GTEx/v8/Artery_Tibial:GTEx/v8/Brain_Cerebellum:GTEx/v8/Muscle_Skeletal:GTEx/v8/Nerve_Tibial	+	No
202	q13.12	rs4586564	Y	N	3	1	250.934	rs1644654	0.620073	19	37467861	C	G	-0.00784461	0.00127389	7.349e-10	0.4742	0.169507	ZNF568	protein_coding	intronic	0.091	6	4.90823e-09	PsychENCODE_eQTLs:eQTLGen_cis_eQTLs:BIOSQTL/BIOS_eQTL_geneLevel:GTEx/v8/Adipose_Subcutaneous:GTEx/v8/Adipose_Visceral_Omentum:GTEx/v8/Artery_Aorta:GTEx/v8/Artery_Tibial:GTEx/v8/Brain_Cerebellum:GTEx/v8/Muscle_Skeletal:GTEx/v8/Nerve_Tibial	+	No
203	q13.32	rs429358	Y	N	3	1	157.093	rs12721051	1	19	45422160	C	G	0.0121623	0.00156388	7.423e-15	0.7908	0.659115	APOC1	protein_coding	UTR3	1.377	5	0.0507383	GTEx/v8/Adrenal_Gland	+	No
203	q13.32	rs429358	Y	N	3	1	99.2884	rs74579864	1	19	45342007	C	G	-0.00766567	0.0013594	1.715e-08	0.3238	0.838371	PVRL2	protein_coding	intergenic	0.519	7	0.531937	PsychENCODE_eQTLs:eQTLGen_cis_eQTLs:BIOSQTL/BIOS_eQTL_geneLevel:GTEx/v8/Muscle_Skeletal	-	No
203	q13.32	rs429358	Y	N	3	1	71.832	rs58446550	1	19	45328380	A	C	-0.00836534	0.00133931	4.214e-10	0.3437	0.718132	BCAM	protein_coding	intergenic	0.59	5
204	q13.33	rs10401643	Y	Y	3	1	200.312	rs62128062	1	19	49962892	A	G	-0.00637366	0.00137068	3.318e-06	0.3139	0.92291			intronic	0.328	2b
204	q13.33	rs10401643	Y	Y	3	1	99.8857	rs2335090	1	19	49950413	C	G	0.00630583	0.00136431	3.793e-06	0.6806	0.893354			intronic	1.916	5
204	q13.33	rs10401643	Y	Y	3	1	94.4032	rs10401643	0.999991	19	49965475	T	C	0.009621	0.00162682	3.334e-09	0.6443	1	ALDH16A1	protein_coding	intronic	0.178	7	1.35195e-07	eQTLGen_cis_eQTLs:BIOSQTL/BIOS_eQTL_geneLevel:GTEx/v8/Adipose_Subcutaneous:GTEx/v8/Adipose_Visceral_Omentum:GTEx/v8/Adrenal_Gland:GTEx/v8/Cells_EBV-transformed_lymphocytes:GTEx/v8/Whole_Blood:GTEx/v8/Artery_Aorta:GTEx/v8/Artery_Coronary:GTEx/v8/Artery_Tibial:GTEx/v8/Brain_Amygdala:GTEx/v8/Brain_Anterior_cingulate_cortex_BA24:GTEx/v8/Brain_Caudate_basal_ganglia:GTEx/v8/Brain_Cerebellar_Hemisphere:…	+	No
205	p13	rs56301259	Y	Y	3	1	445.581	rs67414469	1	20	1895273	T	C	-0.00783358	0.0013159	2.638e-09	0.6278	0.918269	SIRPA	protein_coding	intronic	8.994	5	0.137721	eQTLGen_cis_eQTLs:BIOSQTL/BIOS_eQTL_geneLevel	-	No
205	p13	rs56301259	Y	Y	3	1	235.167	rs66523711	1	20	1895570	T	C	0.0075887	0.00131817	8.553e-09	0.3691	0.896443	SIRPA	protein_coding	intronic	0.302	7	0.137721	eQTLGen_cis_eQTLs:BIOSQTL/BIOS_eQTL_geneLevel	-	No
205	p13	rs56301259	Y	Y	3	1	198.089	rs68064046	1	20	1895016	A	G	0.0078168	0.00131685	2.912e-09	0.3709	0.963808	SIRPA	protein_coding	intronic	6.224	7	0.137721	eQTLGen_cis_eQTLs:BIOSQTL/BIOS_eQTL_geneLevel	-	No
206	p12.1	rs80044408	Y	Y	3	0.999851	24.141	rs10485543	1	20	15986886	C	G	0.00656541	0.00183597	0.0003484	0.8605	0.305533			intronic	8.605	5
206	p12.1	rs80044408	Y	Y	3	0.999851	18.9601	rs1885945	1	20	16002856	T	C	-0.00609629	0.00172944	0.0004242	0.1613	0.261004			intronic	1.709	7
206	p12.1	rs80044408	Y	Y	3	0.999851	4.96026	rs80044408	1	20	16025289	T	G	-0.0136673	0.00235683	6.676e-09	0.0791	1	MACROD2	protein_coding	intronic	17.1	4	0.0113567			No
207	p11.23	rs6112505	Y	N	3	1	459.869	rs112758438	1	20	19709392	A	G	0.0153734	0.002657	7.196e-09	0.9017	0.453525	SLC24A3	protein_coding	intergenic	4.813	7	0.959518			No
207	p11.23	rs6112505	Y	N	3	1	271.699	rs111304671	1	20	19628740	A	T	-0.0172812	0.00281408	8.208e-10	0.0865	0.367855	SLC24A3	protein_coding	intronic	5.032	2b	0.959518			No
207	p11.23	rs6112505	Y	N	3	1	189.641	rs7272615	1	20	19706617	A	C	-0.0138014	0.00216765	1.933e-10	0.1582	0.786672	SLC24A3	protein_coding	intergenic	10.48	5	0.959518			No
208	q11.21	rs6119267	Y	N	3	1	411.001	rs293553	1	20	31085360	A	G	-0.00893621	0.00158472	1.715e-08	0.5288	0.43927	C20orf112	protein_coding	intronic	0.4	4	0.973021	eQTLGen_cis_eQTLs:BIOSQTL/BIOS_eQTL_geneLevel:GTEx/v8/Adipose_Subcutaneous:GTEx/v8/Adrenal_Gland:GTEx/v8/Whole_Blood:GTEx/v8/Artery_Aorta:GTEx/v8/Nerve_Tibial	+	Yes	Adult_Cortex
208	q11.21	rs6119267	Y	N	3	1	242.459	rs4911232	1	20	31029615	C	G	0.00774971	0.00129356	2.088e-09	0.4095	0.217819	C20orf112	protein_coding	intergenic	3.503	4	0.973021	eQTLGen_cis_eQTLs:BIOSQTL/BIOS_eQTL_geneLevel:GTEx/v8/Adipose_Subcutaneous:GTEx/v8/Adrenal_Gland:GTEx/v8/Whole_Blood:GTEx/v8/Artery_Aorta:GTEx/v8/Nerve_Tibial	+	Yes	Adult_Cortex
208	q11.21	rs6119267	Y	N	3	1	179.406	rs34627022	1	20	31170277	A	G	0.00823356	0.00144044	1.088e-08	0.2655	0.638188	C20orf112	protein_coding	ncRNA_intronic	13.68	5	0.973021	eQTLGen_cis_eQTLs:BIOSQTL/BIOS_eQTL_geneLevel:GTEx/v8/Adipose_Subcutaneous:GTEx/v8/Adrenal_Gland:GTEx/v8/Whole_Blood:GTEx/v8/Artery_Aorta:GTEx/v8/Nerve_Tibial	+	Yes	Adult_Cortex
209	q12	rs4583528	Y	Y	3	1	43.6693	rs4812705	0.955625	20	42000591	A	G	0.00893407	0.00159196	1.995e-08	0.5556	0.479446	RP5-862K6.4	pseudogene	intergenic	0.8	7
209	q12	rs4583528	Y	Y	3	1	21.9814	rs6065606	0.731731	20	42002322	T	C	-0.0087172	0.00158783	4.026e-08	0.4575	0.467908	RP5-862K6.4	pseudogene	intergenic	1.329	5
209	q12	rs4583528	Y	Y	3	1	12.847	rs2205776	1	20	41932868	T	C	-0.00699869	0.00128322	4.916e-08	0.4346	0.533964	PPIAP21	pseudogene	upstream	3.903
210	q13.2	rs1964133	Y	N	3	1	370.453	rs80211464	1	20	51108192	A	G	-0.00895933	0.0016946	1.242e-07	0.1697	0.136466			ncRNA_intronic	9.17	5
210	q13.2	rs1964133	Y	N	3	1	206.493	rs34320357	0.992084	20	51168305	T	C	0.00908512	0.0016934	8.082e-08	0.83	0.136466			ncRNA_intronic	4.44	6
210	q13.2	rs1964133	Y	N	3	1	169.316	rs6021771	1	20	50782303	A	G	0.00683647	0.00127285	7.811e-08	0.484	0.98325			intronic	3.087	6
211	q13.33	rs66486049	Y	N	3	1	369.857	rs66493913	0.532129	20	62426005	A	G	-0.0184641	0.00250633	1.746e-13	0.0692	1	ZBTB46	protein_coding	intronic	0.61	5	0.814437	PsychENCODE_eQTLs:BIOSQTL/BIOS_eQTL_geneLevel	-	No
211	q13.33	rs66486049	Y	N	3	1	311.934	rs2738758	0.868672	20	62349625	C	G	0.00898746	0.00151687	3.123e-09	0.7723	0.246101	ZGPAT	protein_coding	intronic	1.256	6	2.80186e-05	eQTLGen_cis_eQTLs:BIOSQTL/BIOS_eQTL_geneLevel:GTEx/v8/Brain_Cerebellar_Hemisphere	-	Yes	Fetal_Cortex
211	q13.33	rs66486049	Y	N	3	1	55.3406	rs2750482	0.803167	20	62343164	T	C	0.00934902	0.00152862	9.585e-10	0.7772	0.250806	ZGPAT	protein_coding	intronic	5.037	6	2.80186e-05	eQTLGen_cis_eQTLs:BIOSQTL/BIOS_eQTL_geneLevel:GTEx/v8/Brain_Cerebellar_Hemisphere	-	Yes	Fetal_Cortex
212	q22.3	rs150770076	Y	N	3	1	73.2594	rs11910362	1	21	44042101	T	C	0.00746665	0.00130331	1.012e-08	0.6086	0.984012	AP001626.1	lincRNA	intergenic	0.637	5
212	q22.3	rs150770076	Y	N	3	1	37.7644	rs11908723	0.592155	21	44052297	A	G	-0.00712608	0.00129848	4.059e-08	0.3999	0.983861	AP001626.2	antisense	intergenic	0.09	6
212	q22.3	rs150770076	Y	N	3	1	36.3602	rs9984236	1	21	46499471	A	G	-0.00754163	0.00130977	8.526e-09	0.3811	0.482059	ADARB1	protein_coding	intronic	0.914	3a	0.843939	PsychENCODE_eQTLs:eQTLGen_cis_eQTLs	-	No
213	q12.2	rs111230813	Y	Y	3	1	509.072	rs136257	1	22	31204628	A	T	0.011256	0.00199929	1.806e-08	0.1943	0.947833	OSBP2	protein_coding	intronic	3.72	7	0.0361487	eQTLGen_cis_eQTLs:eQTLGen_trans_eQTLs:BIOSQTL/BIOS_eQTL_geneLevel:GTEx/v8/Adrenal_Gland:GTEx/v8/Muscle_Skeletal	+	Yes	Fetal_Cortex
213	q12.2	rs111230813	Y	Y	3	1	258.869	rs136286	1	22	31193079	T	C	-0.0113434	0.00200519	1.54e-08	0.8072	0.994129	OSBP2	protein_coding	intronic	7.33		0.0361487	eQTLGen_cis_eQTLs:eQTLGen_trans_eQTLs:BIOSQTL/BIOS_eQTL_geneLevel:GTEx/v8/Adrenal_Gland:GTEx/v8/Muscle_Skeletal	+	Yes	Fetal_Cortex
213	q12.2	rs111230813	Y	Y	3	1	246.689	rs557506862	1	22	31989463	T	TGGC	-0.0259159	0.00461795	1.999e-08	0.0293	0.580326	SFI1	protein_coding	intronic	1.247		5.98725e-25	eQTLGen_cis_eQTLs:BIOSQTL/BIOS_eQTL_geneLevel:GTEx/v8/Adipose_Subcutaneous:GTEx/v8/Adipose_Visceral_Omentum:GTEx/v8/Artery_Aorta:GTEx/v8/Artery_Tibial:GTEx/v8/Brain_Cerebellar_Hemisphere:GTEx/v8/Brain_Cerebellum:GTEx/v8/Brain_Cortex:GTEx/v8/Brain_Putamen_basal_ganglia:GTEx/v8/Muscle_Skeletal:GTEx/v8/Nerve_Tibial	+	No
214	q13.2	rs11373181	Y	N	3	1	161.663	rs5751263	1	22	42723032	T	C	-0.00643024	0.0012972	7.154e-07	0.4023	0.656085			intronic	0.603	5
214	q13.2	rs11373181	Y	N	3	1	85.2306	rs5758708	0.999501	22	42721010	A	G	0.0069239	0.00127442	5.553e-08	0.5295	0.880063			intronic	3.558	4
214	q13.2	rs11373181	Y	N	3	1	70.4371	rs6002679	1	22	42707584	A	G	0.00681503	0.00127265	8.555e-08	0.5133	1			intronic	7.982	5
215	NaN	rs12877	Y	N	1	0.968308	5.95404	rs12877	0.20066	23	153630255	C	G	-0.0123455	0.00218351	1.567e-08	0.8553	1	not_found	.	UTR3	0.641	3a

## Sheet: ST8
Supplementary Table 7. Associated lead SNPs for chronic pain from the male GWAS meta-analyses (N = 583,066). GRCh37_bp: base position, P-values are considered GWS after correction for multiple testing at p<5e-08.
GenomicLocus	Genomic_cord	rsID	CHR	GRCh37_bp	Effect allele	Other allele	BETA	SE	Freq1	P	Direction	mvp_Pval	ukb_Pval	GWS_in_inputGWAS	HetPVal	female_beta	female_p	meta_beta	meta_p	start	end	nearestGene	dist	func	biotype	CADD	RDB	Indep_loci	Cond_Sig	Pain-related trait in GWAS catalog and MVP (within 1 Mb upstream and downstream of lead SNP)	Novel pain loci
1	p36.23	rs12140566	1	8677188	T	G	0.0140909	0.0023754	0.1869	2.997e-09	++	2.65e-08	0.019	Y	0.2606	0.00911474	0.01401	0.00953273	9.467e-09	8375842	8980238	RERE	0	intronic	protein_coding	2.709	3a	L1	Y	Pain intensity (PMID:38429522), Response to tocilizumab in rheumatoid arthritis (GCST001476)	N
2	p34.3	rs9726828	1	38315796	A	G	0.0133762	0.00209167	0.2676	1.61e-10	++	4.86e-08	0.00083	Y	0.8139	-0.00175831	0.5932	0.00707429	1.647e-06	38198744	40089945	MTF1	0	intronic	protein_coding	8.279	6	L2	Y	Pain intensity (PMID:38429522)	N
2	p34.3	rs4660293	1	40028180	A	G	-0.0136473	0.00217037	0.7607	3.222e-10	--	2.18e-07	0.00037	N	0.9224	-0.010174	0.002691	-0.0110085	3.051e-13	38198744	40089945	PABPC4	0	intronic	protein_coding	10.12	4	L3	Y	Pain (pleiotropy) (GCST90104572)	N
3	p34.1	rs6699418	1	46100181	A	G	-0.0121378	0.00202264	0.299	1.964e-09	--	5.68e-09	0.038	Y	0.1347	-0.00328834	0.2935	-0.00829182	3.093e-09	45765523	46837749	GPBP1L1	0	intronic	protein_coding	4.359	6	L4	Y	Pain intensity (PMID:38429522)	N
4	p31.1	rs61771932	1	73239539	A	G	0.0145662	0.00261653	0.8532	2.588e-08	++	4.77e-06	0.0015	N	0.9103	0.0113031	0.004308	0.0115854	3.123e-09	72562230	74162910	RP4-660H19.1	0	ncRNA_intronic	lincRNA	0.427	6	L5	Y	Migraine (GCST90102553)	N
5	p31.1	rs71658797	1	77967507	A	T	0.0181258	0.00290153	0.1151	4.188e-10	++	1.59e-08	0.0054	Y	0.4179	0.0168791	0.0001195	0.0135411	3.663e-12	77557339	78623626	AK5	0	intronic	protein_coding	10.96	5	L6	Y	Pain intensity (PMID:38429522)	N
6	p13.2	rs116290371	1	115571390	T	C	0.0445381	0.00790945	0.0139	1.787e-08	++	1.07e-06	0.0046	N	0.7344	0.0105429	0.4535	0.0348112	1.499e-07	114727921	116459090	TSHB	1024	intergenic		2.156	7	L7	Y	Pain (pleiotropy) (GCST90104572)	N
7	q24.1	rs11576904	1	166878464	C	G	-0.0108629	0.00191113	0.3766	1.315e-08	--	2.08e-10	0.48	Y	0.003407	-0.00624856	0.03465	-0.00828644	4.546e-10	166516601	167091899	RP4-782G3.1	1146	intergenic	lincRNA	4.131	1f	L8	Y	Pain intensity (PMID:38429522), Osteoarthritis of the knee (with total joint replacement) (GCST005574)	N
8	q31.1	rs623111	1	191393679	A	C	0.010641	0.00191419	0.3736	2.72e-08	++	2.05e-07	0.026	N	0.3076	0.00702836	0.01803	0.00899987	1.095e-11	190593664	191843158	RP11-309H21.2	196081	intergenic	lincRNA	0.135	7	L9	Y	Smoking initiation (GCST90243968)	Y
9	q32.1	rs10920270	1	201856521	C	G	0.0120349	0.00208433	0.7294	7.747e-09	++	2.63e-05	4e-05	N	0.2734	0.00689352	0.0327	0.00586044	4.431e-05	201685606	201919674	SHISA4	1286	intergenic		8.883	4	L10	Y	Rheumatoid arthritis (GCST90016625)	N
10	q43	rs34967813	1	237841390	A	G	0.012709	0.00200362	0.6908	2.26e-10	++	1.39e-09	0.019	Y	0.1621	0.00686402	0.02698	0.00802403	9.733e-09	237833352	237937874	RYR2	0	exonic	protein_coding	22.6	4	L11	Y	Pain intensity (PMID:38429522)	N
11	q43	rs3897821	1	243420388	A	G	-0.0115645	0.00195975	0.6635	3.615e-09	--	1.7e-06	0.00054	N	0.8153	-0.0122763	5.902e-05	-0.00926561	8.991e-12	243098453	244093433	SDCCAG8	0	intronic	protein_coding	2.802		L12	N	Pain intensity (PMID:38429522), multisite chronic pain (GCST008512)	N
11	q43	rs35570502	1	243728212	T	C	-0.0160754	0.0026584	0.8587	1.478e-09	--	1.91e-09	0.059	Y	0.08004	-0.00772984	0.06458	-0.0112839	2.967e-10	243098453	244093433	AKT3	0	intronic	protein_coding	4.736	7	L12	Y	Pain intensity (PMID:38429522), multisite chronic pain (GCST008512)	N
12	p24.1	rs1355178	2	22588525	T	G	-0.0113538	0.00191786	0.6299	3.212e-09	--	1.05e-05	4.8e-05	N	0.3436	-0.00825866	0.005447	-0.00879132	1.474e-11	22430795	22722766	AC068490.2	0	ncRNA_intronic	lincRNA	7.431	7	L13	Y	Pain (pleiotropy) (GCST90104572)	N
13	p23.3	rs6705514	2	27213937	T	C	-0.0129817	0.00185665	0.5354	2.703e-12	--	5.37e-12	0.024	Y	0.0529	-0.00925931	0.001529	-0.0114348	2.038e-18	26937669	27386349	MAPRE3	0	ncRNA_intronic	protein_coding	0.008	7	L14	Y	Pain intensity (PMID:38429522)	N
14	p23.1	rs176416	2	32652223	A	G	-0.0102799	0.00185559	0.531	3.029e-08	--	6.99e-07	0.011	N	0.5301	-0.00580541	0.04453	-0.00922178	7.066e-13	31672777	33058768	BIRC6	0	intronic	protein_coding	0.677	7	L15	Y	Pain intensity (PMID:38429522), Osteoarthritis of the hip or knee (GCST007092, GCST90034521), osteoarthritis (GCST007093), Knee osteoarthritis (GCST006925, GCST007090)	N
15	p16.3	rs76376207	2	51093698	T	C	0.0217547	0.00358929	0.0717	1.351e-09	++	2.37e-07	0.0015	N	0.8293	0.0122152	0.03038	0.0174774	4.609e-12	50884338	53379489	NRXN1	0	intronic	protein_coding	1.589	6	L16	Y	Pain intensity (PMID:38429522), neuropathic pain (GCST90095046), Response to tocilizumab in rheumatoid arthritis (GCST001476)	N
15	p16.3	rs72807818	2	51819019	A	G	-0.017247	0.00276528	0.1287	4.464e-10	--	7.17e-10	0.046	Y	0.08045	-0.00468933	0.2671	-0.0113318	9.175e-09	50884338	53379489	AC007682.1	0	ncRNA_intronic	lincRNA	0.333	7	L17	Y	Pain intensity (PMID:38429522), neuropathic pain (GCST90095046), Response to tocilizumab in rheumatoid arthritis (GCST001476)	N
15	p16.3	rs12622966	2	53078420	C	G	-0.0148297	0.0018748	0.4222	2.576e-15	--	7.92e-10	4.6e-07	Y	0.4246	-0.00416778	0.1515	-0.00849662	7.077e-11	50884338	53379489	AC010967.2	0	ncRNA_intronic	lincRNA	0.691	7	L18	Y	Pain intensity (PMID:38429522), neuropathic pain (GCST90095046)	N
16	p16.1	rs71420327	2	59777138	T	C	-0.0181104	0.00297379	0.8912	1.13e-09	--	2.5e-06	8.9e-05	N	0.51	-0.0158916	0.0007323	-0.0111242	1.925e-08	59312947	59945789	RP11-444A22.1	0	ncRNA_intronic	lincRNA	4.524	6	L19	Y	Osteoarthritis (GCST90034531)	N
17	q11.2	rs4850917	2	100493439	A	G	0.0109027	0.00190973	0.622	1.133e-08	++	0.00101676	7.8e-08	N	0.00791	0.00758577	0.01052	0.0093276	1.457e-12	100202482	100543061	AFF3	0	intronic	protein_coding	1.137	7	L20	Y	Pain intensity (PMID:38429522)	N
18	q12.1	rs12712181	2	104354232	A	G	0.011844	0.00185381	0.5221	1.667e-10	++	2.18e-08	0.0018	Y	0.6189	0.00325347	0.2622	0.000956882	0.5505	103783737	104662813	AC018880.2	113943	intergenic	pseudogene	8.006	6	L21	Y	Pain intensity (PMID:38429522)	N
18	q12.1	rs2582974	2	104578923	T	C	0.0111166	0.0018571	0.537	2.154e-09	++	4.66e-10	0.15	Y	0.02454	0.00581613	0.0452	0.00694103	1.078e-07	103783737	104662813	RP11-76I14.1	0	ncRNA_intronic	lincRNA	0.077		L21	N	Pain intensity (PMID:38429522)	N
19	q22.1	rs1522907	2	138798579	T	C	-0.0101202	0.00185624	0.4663	4.976e-08	--	7.37e-06	0.0019	N	0.9156	-0.00321611	0.2659	-0.00741207	5.809e-09	138698117	139488033	HNMT	24648	intergenic		17.08		L22	N	Smoking initiation (GCST90243968)	Y
19	q22.1	rs17651262	2	139437714	A	G	0.0112649	0.00192628	0.3625	4.988e-09	++	7.86e-08	0.013	N	0.3665	0.00134575	0.6502	0.00727185	4.495e-08	138698117	139488033	NXPH2	0	intronic	protein_coding	2.662	7	L22	Y	Smoking initiation (GCST90243968)	Y
20	q24.2	rs7568198	2	160418196	T	C	0.0167772	0.0030677	0.8986	4.525e-08	++	5.85e-06	0.0022	N	0.9662	0.013913	0.003711	0.0135577	4.871e-10	160257558	161140731	BAZ2B	0	intronic	protein_coding	4.063	7	L23	Y	Opioid use disorder (GCST90296425)	Y
21	q33.3	rs55772859	2	208042581	A	C	0.012434	0.00199262	0.3155	4.387e-10	++	1.07e-06	8.4e-05	N	0.5646	0.0116631	0.0001723	0.010915	9.027e-16	207886157	211543147	AC007879.1	0	ncRNA_intronic	lincRNA	0.619	6	L24	Y	Pain (pleiotropy) (GCST90104572)	N
21	q33.3	rs7569963	2	208473184	A	G	-0.0119844	0.0020186	0.3011	2.903e-09	--	2.35e-07	0.0032	N	0.6852	-0.00794684	0.01079	-0.00737912	1.085e-07	207886157	211543147	METTL21A	0	intronic	protein_coding	1.892	7	L25	Y	Pain (pleiotropy) (GCST90104572)	N
21	q33.3	rs28485712	2	211347806	T	C	0.0122305	0.00213483	0.7487	1.011e-08	++	2.87e-06	0.00094	N	0.8687	0.0148348	8.429e-06	0.0102413	2.046e-12	207886157	211543147	CPS1	0	intronic	protein_coding	3.52	6	L26	Y	General pain factor (GCST90129461), Pain (pleiotropy) (GCST90104572)	N
22	q35	rs34537949	2	220340880	T	TG	0.0131008	0.00231954	0.3576	1.627e-08	+?	1.63e-08		Y	1	0.0128567	0.1177	0.00833929	3.228e-07	220339466	220393317	SPEG	0	intronic	protein_coding	2.498		L27	Y	Pain intensity (PMID:38429522)	N
23	p21.31	rs73078304	3	48579409	A	G	0.0169733	0.0030207	0.895	1.918e-08	++	2.16e-06	0.0025	N	0.9175	0.000143549	0.9752	0.0107675	4.729e-09	47638657	53282653	PFKFB4	0	intronic	protein_coding	3.461	6	L28	N	Pain intensity (PMID:38429522), multisite chronic pain (GCST008512), Migraine (GCST90102553)	N
23	p21.31	rs144483183	3	48626745	T	C	0.0312243	0.00520665	0.0327	2.01e-09	++	1.69e-09	0.077	Y	0.06271	-0.00586682	0.4532	0.0144087	0.0001237	47638657	53282653	COL7A1	0	intronic	protein_coding	5.007	5	L28	N	Pain intensity (PMID:38429522), multisite chronic pain (GCST008512), Migraine (GCST90102553)	N
23	p21.31	rs7653505	3	49518023	A	G	-0.0113074	0.00193554	0.3547	5.154e-09	--	1.49e-06	0.00092	N	0.9226	-0.0177176	7.71e-06	-0.0235423	8.475e-14	47638657	53282653	DAG1	0	intronic	protein_coding	2.595	7	L28	N	Pain intensity (PMID:38429522), multisite chronic pain (GCST008512), Migraine (GCST90102553)	N
23	p21.31	rs115506546	3	49808007	A	G	-0.027344	0.00423676	0.9497	1.088e-10	--	7.57e-11	0.062	Y	0.04061	-0.00565504	0.385	-0.0206458	2.662e-11	47638657	53282653	IP6K1	0	intronic	protein_coding	3.951	6	L28	N	Pain intensity (PMID:38429522), multisite chronic pain (GCST008512), Migraine (GCST90102553)	N
23	p21.31	rs34484573	3	49880399	A	G	-0.0220926	0.0028353	0.1214	6.59e-15	--	2.44e-10	5.3e-06	Y	0.7728	-0.00709274	0.1031	-0.0142661	9.077e-16	47638657	53282653	TRAIP	0	intronic	protein_coding	0.636	2b	L28	N	Pain intensity (PMID:38429522), multisite chronic pain (GCST008512), Migraine (GCST90102553)	N
23	p21.31	rs1317154	3	49910084	T	C	-0.0189802	0.00185191	0.4982	1.199e-24	--	1e-20	7.9e-06	Y	0.1484	-0.0085471	0.002996	-0.0139537	6.633e-28	47638657	53282653	ACTBP13	695	downstream	pseudogene	9.246	5	L28	Y	Pain intensity (PMID:38429522), multisite chronic pain (GCST008512), Migraine (GCST90102553)	N
23	p21.31	rs142344547	3	49956036	A	G	-0.0285881	0.00392371	0.0592	3.199e-13	--	1.14e-09	6.3e-05	Y	0.9708	-0.0176951	0.003809	-0.0198776	1.612e-15	47638657	53282653	MON1A	0	intronic	protein_coding	2.617	7	L28	N	Pain intensity (PMID:38429522), multisite chronic pain (GCST008512), Migraine (GCST90102553)	N
23	p21.31	rs114783302	3	50566730	A	G	-0.0331965	0.00557455	0.0284	2.6e-09	--	9.85e-05	9.6e-07	N	0.0541	-0.0125437	0.1378	-0.0217176	1.035e-07	47638657	53282653	CACNA2D2	25054	intergenic		0.042	5	L28	N	Pain intensity (PMID:38429522), multisite chronic pain (GCST008512), Migraine (GCST90102553)	N
23	p21.31	rs35640835	3	52888116	CT	C	0.0138475	0.00227269	0.6035	1.106e-09	+?	1.11e-09		Y	1	-0.000879234	0.9136	0.00746907	2.927e-06	47638657	53282653	TMEM110-MUSTN1	0	intronic	protein_coding	3.281		L29	Y	Pain intensity (PMID:38429522), osteoarthritis (GCST006926)	N
24	p12.3	rs35149182	3	77307430	A	C	-0.0129349	0.00209743	0.2653	6.979e-10	--	2.09e-07	0.00087	N	0.9206	-0.00830881	0.01028	-0.00725902	1.329e-06	77174700	77438258	ROBO2	0	intronic	protein_coding	1.543	7	L30	Y	General pain factor (GCST90129461), Pain (pleiotropy) (GCST90104572)	N
25	q13.12	rs149566819	3	107066826	CTTCTGTAAAATAAGAAGG	C	0.0169166	0.00305354	0.8427	3.016e-08	+?	3.02e-08		Y	1	-0.0245482	0.02266	0.00701207	0.0001095	106986766	107232574	RP11-446H18.5	0	ncRNA_intronic	lincRNA	12.5		L31	Y	Pain intensity (PMID:38429522), multisite chronic pain (GCST008512; GCST012332)	N
26	q22.2	rs9852075	3	135947144	T	G	-0.0123429	0.0021507	0.7542	9.516e-09	--	2.15e-06	0.0012	N	0.9398	-0.0141744	2.459e-05	-0.011905	1.165e-15	135468347	136866553	PCCB	22003	intergenic		2.197	6	L32	Y	multisite chronic pain (GCST008512; GCST012332)	N
27	p16.3	rs34884217	4	944210	A	C	-0.0171303	0.00296782	0.8907	7.834e-09	--	5.26e-05	1.4e-05	N	0.1675	-0.0118784	0.009578	-0.0108988	9.799e-07	749620	3448228	TMEM175	0	exonic:splicing	protein_coding	0.091		L33	Y	Back pain (GCST90245851)	N
27	p16.3	rs11937729	4	3017169	T	C	0.014286	0.00198279	0.6786	5.784e-13	++	1.4e-08	7.4e-06	Y	0.5528	0.00897682	0.003498	0.0100628	4.467e-14	749620	3448228	GRK4	0	intronic	protein_coding	4.75	6	L34	Y	Pain intensity (PMID:38429522)	N
27	p16.3	rs12510489	4	3282774	A	T	0.0152972	0.00277173	0.128	3.406e-08	++	1.18e-06	0.0078	N	0.6365	0.0154125	0.000315	0.0132487	8.12e-12	749620	3448228	MSANTD1	9308	intergenic		5.502	6	L34	N	Pain intensity (PMID:38429522)	N
28	p15.2	rs34811474	4	25408838	A	G	-0.0177613	0.00222489	0.2229	1.433e-15	--	1.39e-09	1.1e-07	Y	0.2842	-0.0147967	1.511e-05	-0.0137494	1.443e-19	25114664	25455733	ANAPC4	0	exonic	protein_coding	23.7	6	L35	Y	multisite chronic pain (GCST008512; GCST012332)	N
29	q13.2	rs11725618	4	67053769	T	C	-0.011421	0.00205747	0.7178	2.837e-08	--	1.14e-08	0.15	Y	0.05001	-0.00458119	0.1582	-0.00846627	2.664e-09	67041359	68058681	RP11-25H12.1	38038	intergenic	lincRNA	5.034	6	L36	N	Pain intensity (PMID:38429522)	N
29	q13.2	rs2318541	4	67831578	T	C	-0.011119	0.00185224	0.492	1.938e-09	--	6.95e-07	0.00073	N	0.9463	-0.010642	0.0002414	-0.00815217	1.782e-10	67041359	68058681	RNU6-699P	68488	intergenic	snRNA	4.941		L36	Y	Pain intensity (PMID:38429522)	N
30	q22.1	rs140695649	4	90712556	CT	C	-0.0113604	0.00204178	0.2895	2.637e-08	--	3.78e-07	0.016	N	0.4211	-0.00336842	0.2871	-0.00893415	1.918e-07	90508340	90968924	SNCA	0	intronic	protein_coding	0.98		L37	Y	Smoking initiation (GCST90243968)	Y
31	q24	rs13107325	4	103188709	T	C	0.0318465	0.00339768	0.0808	7.068e-21	++	3.5e-15	3.6e-07	Y	0.9066	0.0321465	4.527e-09	0.0248834	9.679e-20	102321252	104069822	SLC39A8	0	exonic	protein_coding	23.1	5	L38	Y	Pain intensity (PMID:38429522), multisite chronic pain (GCST008512; GCST012332, GCST012334)	N
32	q31.1	rs13136239	4	140908755	A	G	-0.01534	0.00196013	0.3362	5.029e-15	--	1.56e-14	0.0099	Y	0.03547	-0.016658	3.839e-08	-0.0137798	8.321e-25	140837043	140971038	MAML3	0	intronic	protein_coding	3.311	4	L39	Y	multisite chronic pain (GCST008512)	N
33	p13.3	rs56070621	5	30825684	A	T	0.0103475	0.00185573	0.4684	2.468e-08	++	4.16e-07	0.014	N	0.4507	0.0104469	0.0003217	0.0113424	1.217e-18	30575163	30913155	RPL19P11	227987	intergenic	pseudogene	2.537	7	L40	Y	Back pain (GCST90245851), General pain factor (GCST90129461), Pain (pleiotropy) (GCST90104572)	N
34	q11.2	rs140344995	5	56269756	CT	C	-0.015069	0.00275787	0.2042	4.646e-08	-?	4.65e-08		Y	1	0.000345137	0.9721	-0.00590562	0.00222	55993235	56277009	AC114973.1	1663	intergenic	pseudogene	2.861		L41	Y	Pain intensity (PMID:38429522)	N
35	q15	rs10078941	5	93279029	T	C	-0.017963	0.00277078	0.1281	8.983e-11	--	8.5e-09	0.0023	Y	0.5174	-0.0151759	0.000353	-0.0127928	1.748e-09	92689558	93634656	FAM172A	0	intronic	protein_coding	3.605	7	L42	Y	Migraine (GCST002081)	N
36	q23.1	rs7726836	5	120065919	A	T	-0.0123426	0.00187635	0.4197	4.775e-11	--	1.11e-12	0.24	Y	0.003081	-0.0175287	8.921e-09	-0.0112075	4.626e-16	119920720	120322392	RNU4-69P	19383	intergenic	snRNA	1.093	5	L43	Y	Pain intensity (PMID:38429522), multisite chronic pain (GCST008512)	N
37	q31.1	rs35096828	5	133897439	T	C	0.014531	0.00206056	0.7192	1.765e-12	++	5.42e-10	0.00067	Y	0.5476	0.00837828	0.009159	0.0112264	3.85e-15	133793417	134306784	JADE2	0	intronic	protein_coding	4.866	4	L44	Y	Pain intensity (PMID:38429522), migraine disorder (GCST010178)	N
38	q33.2	rs2963998	5	153177053	T	C	-0.010607	0.00185211	0.4948	1.024e-08	--	1.52e-09	0.21	Y	0.02147	-0.00794349	0.005852	-0.00899552	1.774e-12	153053621	153483653	GRIA1	0	intronic	protein_coding	2.784		L45	Y	Pain intensity (PMID:38429522), Response to amphetamines (GCST001651)	N
39	p22.3	rs6916251	6	19761215	T	C	0.0106499	0.00187202	0.5729	1.28e-08	++	2.02e-07	0.014	N	0.4069	-6.69522e-05	0.9819	0.00459668	0.000337	19701688	19823252	RP1-167F1.2	0	ncRNA_intronic	antisense	1.903	6	L46	Y	Opioid use disorder (GCST90134625)	Y
40	p21.32	rs9278029	6	33341424	A	C	0.0122192	0.00206058	0.7192	3.027e-09	++	2.84e-07	0.0028	N	0.7252	0.00348394	0.2785	0.00942917	2.311e-12	33194717	35492740	LYPLA2P1	7403	intergenic	pseudogene	2.182	6	L47	N	Pain intensity (PMID:38429522), multisite chronic pain (GCST008512)	N
40	p21.32	rs3818528	6	33661091	A	G	-0.0117993	0.00186433	0.4426	2.47e-10	--	3.11e-06	1e-05	N	0.272	-0.0115841	7.656e-05	-0.0105505	3.84e-15	33194717	35492740	ITPR3	0	intronic	protein_coding	3.455	1f	L47	Y	Pain intensity (PMID:38429522), multisite chronic pain (GCST008512)	N
40	p21.32	rs552109265	6	34785628	A	AT	0.0206145	0.00284535	0.188	4.327e-13	+?	4.33e-13		Y	1	0.0190398	0.0575	0.0107247	6.638e-17	33194717	35492740	UHRF1BP1	0	intronic	protein_coding	1.379		L48	Y	Pain intensity (PMID:38429522), multisite chronic pain (GCST008512)	N
41	q12	rs72903001	6	69608392	T	C	0.0189079	0.00292602	0.1129	1.032e-10	++	8.13e-10	0.015	Y	0.1697	0.0147499	0.001018	0.0121353	1.224e-09	69449455	70203760	BAI3	0	intronic	protein_coding	0.523	6	L49	Y	Pain intensity (PMID:38429522), response to antidepressant (GCST012157)	N
42	q14.2	rs12193281	6	84325184	T	C	-0.0131059	0.00197736	0.6752	3.393e-11	--	3.45e-11	0.045	Y	0.04582	-0.014311	2.934e-06	-0.0120747	9.487e-19	84226294	84412876	SNAP91	0	intronic	protein_coding	11.92	4	L50	Y	Pain intensity (PMID:38429522)	N
43	q16.1	rs12527158	6	98408610	A	G	-0.0152775	0.00277823	0.8727	3.814e-08	--	1.12e-08	0.18	Y	0.04096	-0.00762305	0.07596	-0.0124971	1.502e-10	97855748	98886500	RP11-436D23.1	0	ncRNA_intronic	lincRNA	1.436	6	L51	N	Pain intensity (PMID:38429522), Response to amphetamines (GCST001651)	N
43	q16.1	rs62422661	6	98545611	T	G	-0.0115587	0.00189861	0.3899	1.146e-09	--	3.46e-09	0.035	Y	0.1302	-0.00358817	0.2237	-0.00635073	1.37e-06	97855748	98886500	RP11-436D23.1	0	ncRNA_intronic	lincRNA	4.939	5	L51	Y	Pain intensity (PMID:38429522), Response to amphetamines (GCST001651)	N
44	q16.3	rs314281	6	105400605	T	C	-0.0101289	0.00185274	0.514	4.574e-08	--	8.32e-05	7.6e-05	N	0.2635	-0.00917335	0.001482	-0.00777763	1.227e-09	105001954	105528088	LIN28B	4317	intergenic		10.09		L52	Y	Rheumatoid arthritis (GCST90132223)	N
45	q22.32	rs9388489	6	126698719	A	G	0.0113977	0.00185902	0.5434	8.74e-10	++	2.81e-05	1.8e-06	N	0.09709	0.00260571	0.3674	0.00820956	1.35e-10	126574712	127183470	CENPW	28697	intergenic		11.48	6	L53	Y	Migraine (GCST002081), migraine disorder (GCST90429186)	N
46	q23.1	rs10563584	6	130363602	CTTT	C	0.0124684	0.00224251	0.565	2.702e-08	+?	2.7e-08		Y	1	0.0108651	0.1715	0.00604092	2.759e-06	130311920	130447089	L3MBTL3	0	intronic	protein_coding	8.126		L54	Y	Pain intensity (PMID:38429522), migraine disorder (GCST002079)	N
47	q25.1	rs6927072	6	152257687	T	G	0.0110104	0.00186554	0.5601	3.582e-09	++	5.31e-11	0.43	Y	0.002939	0.00681632	0.02059	0.0109794	1.816e-16	152171113	152404238	ESR1	0	intronic	protein_coding	5.952	7	L55	Y	Pain intensity (PMID:38429522), osteoporosis (GCST90086122)	N
48	q26	rs12190823	6	163092643	A	G	0.0131678	0.00225824	0.2139	5.515e-09	++	2.69e-07	0.0052	N	0.6037	0.0030723	0.3791	0.00957103	2.06e-10	162931993	163304941	PARK2	0	intronic	protein_coding	7.115	6	L56	Y	Lumbar disk degeneration (PMID:22993228)	N
49	p22.3	rs13234909	7	1866931	A	G	0.0108269	0.00189713	0.3916	1.147e-08	++	4.55e-07	0.0065	N	0.5998	0.00852991	0.003771	0.0078798	1.184e-09	1798931	4001233	MAD1L1	0	intronic	protein_coding	3.194	5	L57	N	Pain intensity (PMID:38429522), Neuropathic pain in head and neck cancer (GCST005934)	N
49	p22.3	rs56180486	7	2050747	T	C	-0.0189873	0.00235896	0.1903	8.326e-16	--	8.25e-14	0.00094	Y	0.1687	-0.0142334	0.0001294	-0.0152103	3.524e-23	1798931	4001233	MAD1L1	0	intronic	protein_coding	0.254	5	L57	Y	Pain intensity (PMID:38429522), Neuropathic pain in head and neck cancer (GCST005934)	N
49	p22.3	rs7789656	7	3546920	A	C	0.0125657	0.00220684	0.7719	1.244e-08	++	1.28e-06	0.0027	N	0.8564	0.0137769	5.78e-05	0.0102733	2.58e-12	1798931	4001233	SDK1	0	intronic	protein_coding	2.558	7	L58	Y	multisite chronic pain (GCST008512; GCST012332)	N
50	p15.3	rs12672629	7	21531831	A	G	0.0123094	0.0018679	0.5651	4.401e-11	++	2.11e-09	0.0038	Y	0.3663	0.0120552	5.925e-05	0.0117111	2.265e-17	21422023	21698780	SP4	0	intronic	protein_coding	1.38	6	L59	Y	Pain intensity (PMID:38429522), multisite chronic pain (GCST008512; GCST012332)	N
51	q21.3	rs12155198	7	95840943	A	C	0.0109757	0.00185808	0.5404	3.48e-09	++	0.000105917	1.3e-06	N	0.05931	0.00841398	0.004268	0.0103559	3.503e-15	95705989	96065364	SLC25A13	0	intronic	protein_coding	0.11	5	L60	Y	multisite chronic pain (GCST008512; GCST012332)	N
52	q31.1	rs1881447	7	109118570	T	C	0.0121251	0.00185882	0.4572	6.913e-11	++	1.95e-08	0.00086	Y	0.7397	0.00792412	0.006085	0.00809058	2.351e-10	108924976	109235327	AC073071.1	43467	intergenic	lincRNA	16.94	7	L61	Y	Pain intensity (PMID:38429522)	N
53	q31.1	rs6466488	7	114145525	A	G	0.0183525	0.00185398	0.4764	4.215e-23	++	1.44e-18	3.3e-06	Y	0.321	0.00949195	0.001107	0.0145127	2.073e-29	113741727	114551514	FOXP2	0	intronic	protein_coding	13.23	7	L62	Y	Pain intensity (PMID:38429522), Neck or shoulder pain (GCST010080), multisite chronic pain (GCST008512; GCST012332)	N
53	q32.1	rs13312596	7	114351527	A	G	-0.0111354	0.00188704	0.5959	3.622e-09	--	5.43e-07	0.0018	N	0.8628	-0.0113592	9.823e-05	-0.00959237	1.137e-13	127155539	127836132	FOXP2	17699	intergenic		11.88	4	L62	N	Pain intensity (PMID:38429522), Neck or shoulder pain (GCST010080), multisite chronic pain (GCST008512; GCST012332)	N
54	q32.1	rs17151639	7	127637816	A	G	0.0129316	0.00208071	0.7279	5.129e-10	++	1.26e-11	0.3	Y	0.003915	0.00670983	0.0379	0.00919798	6.686e-10	127155539	127836132	SND1	0	intronic	protein_coding	1.844	3a	L63	Y	Pain intensity (PMID:38429522)	N
55	q34	rs17621014	7	140155800	T	C	0.0172589	0.00306769	0.1014	1.845e-08	++	1.1e-10	0.65	Y	0.001408	0.0101788	0.03508	0.0143397	6.097e-11	140058376	140183018	MKRN1	0	intronic	protein_coding	13.84	4	L64	N	Pain intensity (PMID:38429522), Migraine without aura (GCST002078)	N
55	q34	rs79453306	7	140173170	A	G	0.0144943	0.00210123	0.7362	5.263e-12	++	6.78e-11	0.0082	Y	0.1588	0.0174794	9.107e-08	0.0139608	6.606e-22	140058376	140183018	MKRN1	0	intronic	protein_coding	5.32	7	L64	Y	Pain intensity (PMID:38429522), Migraine without aura (GCST002078)	N
56	p23.1	rs1914825	8	8221311	C	G	-0.016545	0.00269638	0.8634	8.441e-10	--	2.93e-08	0.0061	Y	0.4327	-0.00593138	0.1626	-0.010387	6.442e-09	8088230	12303418	SGK223	0	intronic	protein_coding	0.482	7	L65	Y	Pain intensity (PMID:38429522), Osteoarthritis of the hip or knee (GCST007092), osteoarthritis (GCST007091, GCST007093)	N
56	p23.1	rs4841117	8	9130132	T	C	-0.0114615	0.00196798	0.3309	5.756e-09	--	1.2e-06	0.0013	N	0.9935	-0.00143834	0.6373	-0.0065572	1.784e-06	8088230	12303418	RP11-115J16.1	0	ncRNA_intronic	lincRNA	6.901	2c	L65	N	Pain intensity (PMID:38429522), Osteoarthritis of the hip or knee (GCST007092), osteoarthritis (GCST007091, GCST007093)	N
56	p23.1	rs12682109	8	9275335	C	G	0.0158371	0.00277358	0.1278	1.13e-08	++	1.37e-06	0.0023	N	0.8936	0.00759156	0.07668	0.00865378	3.136e-06	8088230	12303418	RP11-115J16.2	0	ncRNA_intronic	lincRNA	13.71	5	L65	N	Pain intensity (PMID:38429522), Osteoarthritis of the hip or knee (GCST007092), osteoarthritis (GCST007091, GCST007093)	N
56	p23.1	rs13270870	8	10770782	A	G	0.0114391	0.00185309	0.5171	6.697e-10	++	8.35e-09	0.013	Y	0.263	0.00444335	0.1228	0.00777773	1.195e-09	8088230	12303418	XKR6	0	intronic	protein_coding	0.165	5	L66	Y	Pain intensity (PMID:38429522), Osteoarthritis of the hip or knee (GCST007092), osteoarthritis (GCST007091, GCST007093)	N
56	p23.1	rs7459547	8	11854888	T	G	-0.0112719	0.00185241	0.5105	1.168e-09	--	3.97e-07	0.00077	N	0.9964	-0.00440849	0.1258	-0.00832049	6.428e-11	8088230	12303418	DEFB134	1066	intergenic		1.38		L66	N	Pain intensity (PMID:38429522), Osteoarthritis of the hip or knee (GCST007092), osteoarthritis (GCST007091, GCST007093)	N
57	q12.3	rs4538926	8	65929990	A	T	0.0121437	0.00221965	0.2244	4.463e-08	++	3.4e-07	0.027	N	0.3271	0.00431374	0.2164	0.00718259	7.296e-06	65795702	65986889	RP11-89A16.1	43906	intergenic	pseudogene	19.91	4	L67	Y	Smoking initiation (GCST90243968)	Y
58	q22.1	rs10104041	8	95571602	A	G	-0.0123591	0.00204114	0.2898	1.405e-09	--	3.88e-08	0.0076	Y	0.4133	-0.00643383	0.04379	-0.00752307	2.615e-08	95350630	95663371	RP11-267M23.4	0	ncRNA_intronic	lincRNA	11	7	L68	Y	Pain intensity (PMID:38429522)	N
59	q24.3	rs59918340	8	142232256	A	G	-0.0129999	0.001855	0.5285	2.409e-12	--	3.77e-11	0.0067	Y	0.1612	-0.00859945	0.002847	-0.0103454	4.377e-16	142198315	142253481	SLC45A4	0	intronic	protein_coding	2.221	4	L69	Y	Pain intensity (PMID:38429522), multisite chronic pain (GCST008512)	N
60	p21.3	rs10757346	9	22599344	A	C	-0.0110676	0.00191184	0.3759	7.076e-09	--	3.1e-06	0.00058	N	0.7758	-0.00399395	0.2169	-0.00832578	5.888e-08	22334480	22876746	RP11-399D6.2	46854	intergenic	lincRNA	1.641	7	L70	Y	Pain (pleiotropy) (GCST90104572)	N
61	q22.31	rs10992800	9	96373818	A	G	-0.0134609	0.00190018	0.3881	1.402e-12	--	9.68e-08	1.8e-06	N	0.3049	-0.0123828	2.575e-05	-0.01067	2.449e-16	96136620	98129955	PHF2	0	intronic	protein_coding	0.348	7	L71	Y	Pain intensity (PMID:38429522), Osteoarthritis of the hip or knee (GCST90034536)	N
61	q22.31	rs141442828	9	97773266	T	TAATA	0.0246274	0.00443737	0.0673	2.855e-08	+?	2.85e-08		Y	1	-0.00976224	0.5354	0.0124302	6.481e-07	96136620	98129955	C9orf3	0	intronic	protein_coding	15.35		L71	N	Pain intensity (PMID:38429522), Osteoarthritis of the hip or knee (GCST90034536)	N
62	q31.1	rs3793639	9	108359539	A	C	0.0180016	0.00304648	0.103	3.436e-09	++	4.28e-05	6.2e-06	N	0.1336	0.000183222	0.9689	0.00737366	0.0002363	107883644	108754169	FKTN	0	intronic	protein_coding	5.634	7	L72	Y	Osteoarthritis (GCST90034524)	N
63	q33.2	rs10465137	9	122659596	T	C	0.0106115	0.00185874	0.4575	1.133e-08	++	9.25e-10	0.27	Y	0.01355	0.00965778	0.0008897	0.010888	6.526e-17	122625226	122676273	RP11-360A18.2	37734	intergenic	lincRNA	3.808	7	L73	Y	Pain intensity (PMID:38429522)	N
64	q33.3	rs656322	9	127834277	A	G	-0.0112924	0.00191073	0.377	3.419e-09	--	3.28e-09	0.076	Y	0.07245	-0.010711	0.0003125	-0.00968042	8.64e-13	127603434	128748566	SCAI	0	intronic	protein_coding	1.685	7	L74	N	Pain intensity (PMID:38429522)	N
64	q33.3	rs10819064	9	128499956	T	G	0.0118407	0.00185999	0.4537	1.94e-10	++	2.77e-10	0.045	Y	0.06834	0.0036779	0.2104	0.00825108	7.942e-10	127603434	128748566	RP11-423C15.3	6076	intergenic	lincRNA	0.672	6	L74	Y	Pain intensity (PMID:38429522)	N
65	p14	rs10905560	10	9468874	A	C	0.0103047	0.00185203	0.4982	2.634e-08	++	1.15e-07	0.038	N	0.2279	0.000662415	0.8179	0.0051788	4.724e-05	9357454	9625926	LINC00709	139853	intergenic	lincRNA	0.181	7	L75	Y	Pain intensity (PMID:38429522), Migraine (GCST90102553), Rheumatoid arthritis (GCST90132222)	N
66	p12.33	rs1325993	10	18662768	A	G	-0.0117105	0.00185234	0.4905	2.585e-10	--	4.58e-11	0.13	Y	0.0172	-0.00697381	0.01574	-0.00921173	7.334e-13	18556124	22299503	CACNB2	0	intronic	protein_coding	1.18		L76	Y	Pain intensity (PMID:38429522)	N
66	p12.33	rs10828248	10	21824619	A	G	-0.0138541	0.00193332	0.6435	7.735e-13	--	1.11e-10	0.0012	Y	0.383	-0.0124612	3.868e-05	-0.0126348	4.033e-21	18556124	22299503	MLLT10	0	intronic	protein_coding	3.906	4	L77	Y	Pain intensity (PMID:38429522), multisite chronic pain (GCST008512; GCST012332)	N
67	q22.2	rs57204459	10	76892995	CA	C	-0.0135361	0.00225452	0.5827	1.923e-09	-?	1.92e-09		Y	1	-0.0165584	0.03835	-0.00677242	1.37e-07	76664836	77106565	SAMD8	0	intronic	protein_coding	0.101		L78	Y	Pain intensity (PMID:38429522), Osteoarthritis of the hip or knee (with total joint replacement) (GCST90034526)	N
68	q24.32	rs57602965	10	105020445	CACAA	C	-0.0122948	0.00224644	0.4287	4.424e-08	-?	4.42e-08		Y	1	-0.0116655	0.143	-0.00933242	3.08e-09	104547610	106820700	RPEL1	12671		protein_coding	0.543		L79	Y	Pain intensity (PMID:38429522), multisite chronic pain (GCST008512; GCST012332)	N
68	q24.32	rs11192193	10	106569253	A	G	0.012077	0.001856	0.5328	7.655e-11	++	1.42e-09	0.0081	Y	0.2525	0.0138265	1.877e-06	0.0104942	1.13e-15	104547610	106820700	SORCS3	0	intronic	protein_coding	5.193	2b	L80	Y	Pain intensity (PMID:38429522), multisite chronic pain (GCST008512; GCST012332)	N
69	p15.1	rs757081	11	17351683	C	G	0.0120399	0.00196827	0.6693	9.532e-10	++	4.61e-08	0.0047	Y	0.5028	0.00476085	0.1189	0.00803911	2.552e-09	17000864	17418477	NUCB2	0	exonic	protein_coding	21.1	7	L81	Y	Pain intensity (PMID:38429522)	N
70	p14.1	rs34474658	11	29048276	CGTT	C	-0.0220509	0.00403642	0.9173	4.672e-08	-?	4.67e-08		Y	1	-0.00169266	0.9063	-0.00675754	0.02605	28090599	29449857	RP11-115J23.1	0	ncRNA_intronic	lincRNA	2.846		L82	Y	Pain intensity (PMID:38429522), Back pain (GCST90245851), Osteoarthritis of the hip or knee (GCST007092)	N
71	q12.3	rs2165737	11	62488448	T	C	-0.0105742	0.00188758	0.5966	2.115e-08	--	1.01e-06	0.0057	N	0.6869	-0.00692862	0.02524	-0.00924889	1.615e-09	62317925	62685230	HNRNPUL2-BSCL2	0	intronic	protein_coding	3.341	6	L83	Y	migraine disorder (GCST90102553)	N
72	q13.2	rs554032973	11	67110656	A	ATTT	-0.0254174	0.00456901	0.0632	2.65e-08	-?	2.65e-08		Y	1	-0.0112176	0.4812	-0.0150833	1.061e-05	66302577	67408033	POLD4	7591	intergenic		2.959		L84	Y	Pain intensity (PMID:38429522), Migraine (GCST90102553)	N
73	q23.2	rs7125588	11	113436072	A	G	0.0105909	0.00187119	0.5714	1.509e-08	++	2.11e-06	0.002	N	0.9596	0.00935959	0.001247	0.00892536	8.853e-12	113318907	113451229	DRD2	89658	intergenic		1.64	7	L85	Y	Back pain (GCST90245851), Pain (pleiotropy) (GCST90104572)	N
74	q23.3	rs236911	11	117085270	A	C	0.0160712	0.00280964	0.876	1.066e-08	++	2.56e-07	0.0099	N	0.4817	0.00933914	0.03394	0.0129752	7.302e-13	116519358	117175658	PCSK7	0	intronic	protein_coding	1.923	7	L86	Y	Pain intensity (PMID:38429522)	N
75	p12.3	rs6486925	12	19148654	A	G	-0.0145396	0.00246059	0.8292	3.436e-09	--	9.25e-08	0.0083	N	0.4491	-0.00766068	0.0443	-0.00911693	1.117e-07	18875354	19645861	RPL7P6	93319	intergenic	pseudogene	0.28	7	L87	Y	Smoking initiation (GCST90243968)	Y
75	p12.3	rs954976	12	19314915	A	T	-0.0102804	0.00187769	0.5824	4.38e-08	--	1.59e-06	0.0076	N	0.6653	-0.0102836	0.0008729	-0.00997379	4.532e-12	18875354	19645861	PLEKHA5	0	intronic	protein_coding	1.417	6	L87	N	Smoking initiation (GCST90243968)	Y
76	p12.1	rs9804988	12	23982559	T	C	0.0177466	0.00281157	0.1238	2.756e-10	++	8.18e-06	2.7e-06	N	0.1498	0.0141329	0.0009462	0.0150995	4.917e-15	23784488	24118604	SOX5	0	intronic	protein_coding	0.412	7	L88	Y	Back pain (GCST007152), multisite chronic pain (GCST012332)	N
77	q12	rs11183219	12	46231953	T	C	-0.0116297	0.00209468	0.2664	2.817e-08	--	3.53e-05	0.00014	N	0.3772	-0.00141394	0.6648	-0.00774743	4.941e-08	46076419	46515405	ARID2	0	intronic	protein_coding	5.637	6	L89	Y	Rheumatoid arthritis (GCST90132222)	N
78	q13.2	rs7312770	12	56467587	T	C	0.0109228	0.00185352	0.4798	3.785e-09	++	7.2e-08	0.011	N	0.3883	0.00771364	0.007374	0.00845058	3.179e-11	56354272	56691600	ERBB3	6053	intergenic		2.935	6	L90	Y	Chronic pain (GCST90309352), Pain (pleiotropy) (GCST90104572)	N
79	q24.31	rs1060105	12	123806219	T	C	-0.0161977	0.00231066	0.201	2.386e-12	--	1.4e-12	0.045	Y	0.02442	-0.0132005	0.0002305	-0.0128964	3.074e-16	122961353	123985990	SBNO1	0	exonic	protein_coding	22.9		L91	Y	Pain intensity (PMID:38429522), Migraine (GCST90102553), Knee osteoarthritis (GCST006925, GCST007090, GCST90034523), Hip osteoarthritis (GCST002155, GCST007091), Osteoarthritis ( GCST007093)	N
80	q21.1	rs144102170	13	56765148	A	AT	0.0133327	0.00231711	0.6407	8.707e-09	+?	8.71e-09		Y	1	0.0180472	0.02754			56126436	60829361	SPATA2P1	23358	intergenic	pseudogene	0.417		L92	Y	Pain intensity (PMID:38429522)	N
80	q21.1	rs12866976	13	60332473	T	C	-0.0128204	0.00213709	0.2505	1.982e-09	--	6.22e-07	0.00084	N	0.9815	-0.008658	0.008862	-0.0112061	1.063e-13	56126436	60829361	DIAPH3	0	intronic	protein_coding	0.364	6	L93	Y	Smoking initiation (GCST90243968)	Y
81	q21.2	rs17681972	14	47243109	A	G	-0.0119106	0.00185206	0.5042	1.266e-10	--	1.15e-10	0.055	Y	0.04895	-0.00919436	0.001411	-0.0102714	7.423e-16	46794666	47407743	MDGA2	65716	intergenic		4.825	7	L94	Y	Pain intensity (PMID:38429522)	N
82	q23.1	rs12896930	14	59812408	C	G	-0.0111442	0.0018642	0.5571	2.26e-09	--	1.29e-07	0.0043	N	0.5867	-0.000926917	0.749	-0.00592033	3.269e-06	59677692	60033018	DAAM1	0	intronic	protein_coding	7.817	7	L95	Y	Smoking initiation (GCST90243968)	Y
83	q24.1	rs4902704	14	69703588	C	G	0.0134702	0.0018577	0.4608	4.137e-13	++	6.14e-10	0.00015	Y	0.7903	0.00489395	0.0935	0.0101304	7.887e-15	69376658	69791113	EXD2	0	intronic	protein_coding	1.314	5	L96	Y	Pain intensity (PMID:38429522), Osteoporosis (GCST90018887)	N
84	q32.31	rs3803286	14	103246470	A	G	0.0115953	0.0018639	0.5564	4.93e-10	++	6.84e-08	0.0018	N	0.6996	0.00831171	0.005151	0.00994251	1.387e-13	103113552	103506777	TRAF3	0	intronic	protein_coding	11.87		L97	Y	Pain intensity (PMID:38429522), multisite chronic pain (GCST012332)	N
85	q24.1	rs35697698	15	74177250	T	C	0.0166223	0.0025151	0.1617	3.862e-11	++	4.88e-08	0.00019	Y	0.9288	0.0101144	0.009343	0.0102254	1.968e-09	74091680	75485373	TBC1D21	0	intronic	protein_coding	2.414	5	L98	Y	Pain intensity (PMID:38429522), multisite chronic pain (GCST012332)	N
85	q24.1	rs4886860	15	74340336	C	G	-0.0104699	0.00189844	0.3901	3.49e-08	--	2.06e-06	0.0048	N	0.7809	-0.00975885	0.001783	-0.00731022	5.794e-07	74091680	75485373	PML	182	downstream	protein_coding	2.778	4	L98	N	Pain intensity (PMID:38429522), multisite chronic pain (GCST012332)	N
85	q24.1	rs12594062	15	75102851	T	C	-0.010259	0.00186188	0.5514	3.598e-08	--	0.000115107	3.3e-05	N	0.1855	-0.00732787	0.01395	-0.00688653	1.65e-07	74091680	75485373	LMAN1L	2205	intergenic		1.427	6	L98	N	Pain intensity (PMID:38429522), multisite chronic pain (GCST012332)	N
86	q26.1	rs6496748	15	91546936	A	G	-0.0121862	0.00189227	0.6026	1.196e-10	--	3.12e-05	7.9e-08	N	0.03017	-0.0118987	5.632e-05	-0.0104064	1.047e-15	91444476	91581269	VPS33B	0	intronic	protein_coding	3.604	7	L99	Y	Pain (pleiotropy) (GCST90104572), multisite chronic pain (GCST008512; GCST012332)	N
87	p12.1	rs62032342	16	25338151	A	G	-0.0157659	0.00254535	0.843	5.85e-10	--	1.68e-07	0.0009	N	0.897	-0.00938017	0.01685	-0.0142409	1.45e-15	25227828	25486225	ZKSCAN2	68898	intergenic		2.919	7	L100	Y	Smoking initiation (GCST90243968)	Y
88	p11.2	rs7201780	16	30147265	T	C	-0.0101862	0.00186015	0.4533	4.36e-08	--	1.07e-07	0.058	N	0.1732	-0.00349288	0.2283	-0.00765094	2.104e-09	29871730	31378235	MAPK3	12437	intergenic		1.747	6	L101	N	Rheumatoid arthritis (GCST90132222)	N
88	p11.2	rs13336347	16	30951566	C	G	0.0104544	0.00188469	0.5927	2.912e-08	++	1.81e-07	0.03	N	0.2803	0.00944874	0.001281	0.00707053	4.222e-08	29871730	31378235	FBXL19	0	intronic	protein_coding	1.404	5	L101	Y	Rheumatoid arthritis (GCST90132222)	N
89	q12.1	rs746157	16	49593393	T	C	-0.0146099	0.00247919	0.8324	3.796e-09	--	1.02e-06	0.001	N	0.9717	-0.00419114	0.2786	-0.01143	1.743e-11	49549531	49653496	ZNF423	0	intronic	protein_coding	1.469	5	L102	Y	Smoking initiation (GCST90243968)	Y
90	q22.2	rs12926905	16	71978643	T	C	0.010933	0.00193299	0.6432	1.549e-08	++	0.000315046	1.6e-06	N	0.04518	0.00767255	0.02678	0.00834455	1.993e-05	71417498	72898348	PKD1L3	0	ncRNA_intronic	processed_transcript	2.877	7	L103	Y	Neck or shoulder pain (GCST010080), General pain factor (GCST90129461), Pain (pleiotropy) (GCST90104572)	N
91	q24.3	rs72805578	16	89682491	A	C	-0.0133809	0.00230983	0.2012	6.904e-09	--	7.3e-08	0.018	N	0.3131	-0.00751938	0.03328	-0.00903431	3.069e-09	89067131	90124316	DPEP1	0	intronic	protein_coding	0.134	2b	L104	Y	Pain (pleiotropy) (GCST90104572)	N
92	q21.33	rs967823	17	50317276	A	G	-0.0121334	0.00189703	0.6083	1.597e-10	--	2.33e-07	0.00016	N	0.7772	-0.0175536	2.735e-09	-0.0104623	1.286e-15	50188905	50342947	snoZ178	13568	intergenic	snoRNA	2.051	7	L105	Y	Pain (pleiotropy) (GCST90104572)	N
93	q24.2	rs11653507	17	65892064	A	T	-0.0118416	0.00187962	0.4146	2.967e-10	--	4.01e-08	0.0018	Y	0.661	-0.010438	0.0009068	-0.0133931	4.242e-20	65762341	66158546	BPTF	0	intronic	protein_coding	8.935	6	L106	Y	Pain intensity (PMID:38429522), neuropathic pain (GCST003963)	N
94	q24.3	rs150636180	17	71402677	T	C	-0.110652	0.0199985	0.0031	3.143e-08	-?	3.14e-08		Y	1	-0.0129813	0.8621	-0.0587836	1.001e-06	70416679	72396866	SDK2	0	intronic	protein_coding	0.129	7	L107	Y	Pain intensity (PMID:38429522)	N
95	q21.2	rs10502966	18	50748499	A	G	-0.0135586	0.00187585	0.5795	4.894e-13	--	1.65e-07	2.2e-07	N	0.156	-0.0110684	0.0001471	-0.0131449	1.711e-24	50199585	53725063	DCC	0	intronic	protein_coding	3.805	6	L108	Y	Osteoarthritis (GCST90296702)	N
95	q21.2	rs34704187	18	52800390	A	G	-0.0114879	0.00196678	0.6683	5.182e-09	--	8.2e-08	0.013	N	0.3687	-0.00661647	0.03077	-0.00747539	3.724e-08	50199585	53725063	CTD-2171N6.1	8852	intergenic	lincRNA	3.911	7	L109	N	Pain intensity (PMID:38429522), multisite chronic pain (GCST008512; GCST012332), chronic back pain (GCST007152)	N
95	q21.2	rs79471052	18	52853788	T	C	0.0271686	0.00369088	0.0675	1.821e-13	++	1.02e-11	0.0022	Y	0.2244	0.0168467	0.003372	0.024283	9.267e-18	50199585	53725063	TCF4	35773	intergenic		0.93	5	L109	Y	Pain intensity (PMID:38429522), multisite chronic pain (GCST008512; GCST012332), chronic back pain (GCST007152)	N
95	q21.2	rs73488976	18	52945949	A	G	-0.0245644	0.00425284	0.9501	7.665e-09	--	7.62e-08	0.019	N	0.3071	-0.0144768	0.03369	-0.0169649	1.794e-07	50199585	53725063	TCF4	0	intronic	protein_coding	0.148	6	L109	N	Pain intensity (PMID:38429522), multisite chronic pain (GCST008512; GCST012332), chronic back pain (GCST007152)	N
95	q21.2	rs651350	18	53320738	A	G	0.0195596	0.00272001	0.8662	6.415e-13	++	7.54e-10	0.00019	Y	0.7662	0.0170117	3.52e-05	0.013224	1.518e-12	50199585	53725063	TCF4	0	intronic	protein_coding	0.397	6	L110	Y	Pain intensity (PMID:38429522), multisite chronic pain (GCST008512; GCST012332), chronic back pain (GCST007152)	N
96	q23	rs7241572	18	77580712	A	G	0.0153148	0.00230853	0.2015	3.257e-11	++	3.19e-09	0.0021	Y	0.4745	0.00915034	0.01009	0.012784	3.649e-16	77406443	77934588	RP11-154H12.3	4346	intergenic	lincRNA	3.887	7	L111	Y	Pain intensity (PMID:38429522), Opioid sensitivity (GCST002235)	N
97	q13.32	rs429358	19	45411941	T	C	0.0185593	0.00263066	0.8551	1.727e-12	++	1.09e-10	0.0024	Y	0.2971	0.0113843	0.004254	0.0153218	1.302e-18	45232161	45541782	APOE	0	exonic	protein_coding	12.64	5	L112	Y	Pain intensity (PMID:38429522), Osteoarthritis of the hand (GCST90034527)	N
97	q13.32	rs7412	19	45412079	T	C	0.0196967	0.00340361	0.0805	7.183e-09	++	2.26e-06	0.00084	N	0.8693	0.00795228	0.1317	0.0132339	8.154e-08	45232161	45541782	APOE	0	exonic	protein_coding	25.1	4	L112	N	Pain intensity (PMID:38429522), Osteoarthritis of the hand (GCST90034527)	N
98	p11.23	rs6081722	20	19707101	T	C	-0.0275536	0.0049673	0.1305	2.9e-08	?-		2.9e-08	Y	1	-0.0147488	0.0013	-0.0137429	2.301e-10	19575990	19709392	SLC24A3	3519	intergenic		2.864	4	L113	Y	Pain (pleiotropy) (GCST90104572), multisite chronic pain (GCST008512; GCST012332)	N
99	q11.21	rs6119267	20	31163914	C	G	-0.0126528	0.00198975	0.6828	2.035e-10	--	2.44e-06	1.1e-05	N	0.292	-0.0063199	0.0416	-0.00976177	2.357e-13	30689924	31400673	C20orf112	0	intronic	protein_coding	0.498	5	L114	Y	migraine disorder (GCST003720)	N
100	q13.33	rs2427530	20	62361737	A	G	-0.0127155	0.00218592	0.2344	5.997e-09	--	1.35e-07	0.01	N	0.44	-0.00754677	0.02445	-0.00946079	5.68e-10	62193019	62567684	ZGPAT	0	intronic	protein_coding	2.529	5	L115	N	smoking cessation (GCST90243980)	Y
100	q13.33	rs28637955	20	62447327	A	G	0.0129474	0.00191785	0.6299	1.472e-11	++	6.4e-08	4.9e-05	N	0.6967	0.00464772	0.1183	0.0103645	1.278e-10	62193019	62567684	ZBTB46	0	ncRNA_intronic	protein_coding	7.65	4	L115	Y	smoking cessation (GCST90243980)	Y

## Sheet: ST9
Supplementary Table 8. Associated lead SNPs for chronic pain from the female GWAS meta-analyses (N = 241,266). GRCh37_bp: base position, P-values are considered GWS after correction for multiple testing at p<5e-08.
GenomicLocus	Genomic_cord	rsID	CHR	POS	Effect allele	Other allele	BETA	SE	Freq1	P	Direction	mvp_Pval	ukb_Pval	GWS_in_input_GWAS	HetPVal	male_beta	male_p	meta_beta	meta_p	start	end	nearestGene	dist	func	biotype	CADD	RDB	Indep_loci	Cond_Sig	Pain-related trait in GWAS catalog and MVP (within 1 Mb upstream and downstream of lead SNP)	Novel pain loci
1	p32.3	rs35072907	1	51189556	C	G	-0.0173377	0.00310711	0.4516	2.4e-08	?-		2.4e-08	Y	1	-0.0053715	0.11	-0.00784893	7.136e-07	50735395	51773078	FAF1	0	intronic	protein_coding	1.577	6	L1	Y	multisite chronic pain (GCST012332)	N
2	q21.2	rs59898460	1	150493004	T	C	0.0218139	0.00315869	0.6019	5e-12	?+		5e-12	Y	1	0.00823441	0.016	0.00620165	0.0001148	150163915	150759634	LINC00568	2495	intergenic	lincRNA	1.766	6	L2	Y	multisite chronic pain (GCST012332)	N
3	p25.2	rs147903676	2	5835352	CT	C	0.024771	0.00439982	0.1219	1.803e-08	++	0.257654	2.1e-08	Y	0.321	0.00948209	0.0006786	0.0101392	1.634e-07	5829704	5868452	SOX11	0	UTR3	protein_coding	19.48		L3	Y	multisite chronic pain (GCST012332)	N
4	q24	rs13135092	4	103198082	A	G	-0.032258	0.00524948	0.9181	8.017e-10	--	0.10698	2.4e-09	Y	0.4973	-0.0294523	5.911e-19	-0.0229184	3.267e-18	102507114	103858283	SLC39A8	0	intronic	protein_coding	10.31	6	L4	Y	multisite chronic pain (GCST012332)	N
5	q31.1	rs7675956	4	140911000	A	C	-0.0160783	0.00290065	0.561	2.974e-08	--	0.0355993	2.9e-07	N	0.9338	-0.00462725	0.17			140791102	140977528	MAML3	0	intronic	protein_coding	3.52	5	L5	Y	General pain factor (GCST90129461), multisite chronic pain (GCST008512)	N
6	q11.2	rs3080367	5	57576558	T	TACAC	-0.0212805	0.00382331	0.794	2.6e-08	?-		2.6e-08	Y	1	-0.00497233	0.23			57352665	57892530	PGAM1P1	118978	intergenic	pseudogene	1.682		L6	Y	multisite chronic pain (GCST012332)	N
7	q23.1	rs7718040	5	120150262	A	C	-0.0202993	0.00308453	0.6795	4.665e-11	--	1.34e-06	2.3e-07	N	0.009029	-0.0119446	1.967e-09	-0.0103577	1.674e-14	119913953	120486814	CTD-2334D19.1	23788	intergenic	lincRNA	5.938	7	L7	Y	multisite chronic pain (GCST012332), Pain (pleiotropy) (GCST90104572)	N
8	q34	rs1946247	5	160836620	T	G	-0.0194269	0.00339452	0.2351	1.047e-08	--	0.00378262	5.4e-07	N	0.3867	-0.00575884	0.002686	-0.0110025	3.219e-09	160571458	160960864	GABRB2	0	intronic	protein_coding	2.186	5	L8	Y	multisite chronic pain (GCST008512; GCST012332)	N
9	q35.1	rs34772405	5	170831912	T	C	-0.0163191	0.00288273	0.5255	1.509e-08	--	0.156531	3.3e-08	Y	0.4849	-0.00700708	0.0001567	-0.00922455	5.176e-13	170752596	170873076	NPM1	0	intronic	protein_coding	0.44	5	L9	Y	multisite chronic pain (GCST012332)	N
10	p21.31	rs9469913	6	34827085	A	T	-0.0230439	0.00388664	0.8359	3.046e-09	--	0.0631491	1.7e-08	Y	0.7416	-0.0171913	2.372e-12	-0.0156888	1.496e-21	34447945	35496861	UHRF1BP1	0	exonic	protein_coding	9.912	7	L10	Y	multisite chronic pain (GCST012332)	N
11	q14.3	rs1557171	13	54047205	T	C	-0.0185435	0.00287943	0.4906	1.196e-10	--	0.00897786	3.8e-09	Y	0.779	-0.0046369	0.01232	-0.00868675	8.797e-12	53605235	54172991	AL450423.1	105113	intergenic	miRNA	13.49	6	L11	Y	multisite chronic pain (GCST012332)	N
12	q21.33	rs967823	17	50317276	A	G	-0.0175536	0.00295167	0.6103	2.735e-09	--	0.119417	7.6e-09	Y	0.5093	-0.0121334	1.597e-10	-0.0104623	1.286e-15	50188905	50342947	snoZ178	13568	intergenic	snoRNA	2.051	7	L12	Y	multisite chronic pain (GCST012332)	N

[truncated: 14 more sheets: ST10, ST11, ST12, ST13, ST14, ST15, ST16, ST17, ST18, ST19, ST20, ST21, ST22, ST23]
